# Supplementary material for: Testing the link between genome size and growth rate in maize
Source: PeerJ. 2016 Sep 7;4:e2408. doi: 10.7717/peerj.2408 (PMC5018661; doi:10.7717/peerj.2408)
Supplement: Data S1 [file peerj-04-2408-s001.xlsx]

## Sheet: Sheet1
Inbred lines are shown in columns and SNPs in rows (the two rows correspond to the two alleles of a given locus). Missing data are indicated with 0.
Lines with genotyping data generated for this manuscript are indicated with *
	FV7_inra	FC209_inra	FV252_inra	FV71_inra	LAN496_inra	Mo17_inra	FC16	FV65	FC24_inra	FV75_inra	FC1852_inra	FV76	B73_inra	FV2_inra	EP1_inra	F39_inra	F471_inra	EA1197_inra	NY302_inra	EA1201_inra	N25_inra	W117U	A6_usa	CML245_inra	CML287_usa	EA1866_inra	N6	ARGL256_inra	CML333_usa	F2834T_usa	CML247_usa	BA90_inra	CML254_usa	CML91_usa	CI187-2_inra*	CML-P1_cim	YUBR05	TZI18_usa	EM1712_inra	K64R_cim	LP1037_inra	NC304_usa	CH10	MBS847_inra	KUI11_usa	LP1233_inra	NC320_usa	KUI3_usa	LP35_inra
PZE-101000060	C	C	0	A	A	C	C	A	C	C	0	A	C	A	C	C	C	C	C	C	A	C	A	A	A	C	C	A	C	A	C	C	C	C	A	C	C	C	C	A	C	C	C	0	C	A	C	C	A
	C	C	0	C	A	C	C	A	C	C	0	A	C	A	C	C	C	C	C	C	C	C	A	A	A	C	C	A	C	A	C	C	C	C	A	C	C	C	C	A	C	C	C	0	C	A	C	C	C
PZE-101000088	G	G	0	0	0	C	0	0	G	G	G	0	G	0	G	C	G	0	G	G	G	G	G	G	G	G	G	G	G	G	C	G	G	G	G	0	C	G	0	G	G	C	G	G	C	G	G	G	G
	G	G	0	0	0	C	0	0	G	G	G	0	G	0	G	C	G	0	G	G	G	G	G	G	G	G	G	G	G	G	C	G	G	G	G	0	C	G	0	G	G	C	G	G	C	G	G	G	G
PZE-101000108	G	G	G	0	0	G	G	0	A	G	G	0	G	0	G	G	G	G	G	G	G	G	G	G	G	G	G	G	G	G	G	G	A	G	G	G	G	G	G	G	G	G	A	G	G	A	G	G	0
	G	G	G	0	0	G	G	0	A	G	G	0	G	0	G	G	G	G	G	G	G	G	G	G	G	G	G	G	G	G	G	G	A	G	G	G	G	G	G	G	G	G	A	G	G	A	G	G	0
PZE-101000111	C	T	T	0	0	C	C	0	T	T	C	0	C	0	T	C	T	C	T	C	C	C	C	C	C	T	C	C	T	C	C	C	C	C	C	C	C	C	C	C	C	C	T	C	C	C	C	C	C
	C	T	T	0	0	C	C	0	T	T	C	0	C	0	T	C	T	C	T	C	C	C	C	C	C	T	C	C	T	C	C	C	C	C	C	C	C	C	C	C	C	C	T	C	C	C	C	C	C
PZE-101000161	C	T	T	0	0	C	C	0	T	T	T	0	T	0	T	T	T	C	T	T	T	T	T	T	T	T	T	T	T	T	T	T	T	T	C	T	C	C	T	C	C	T	T	0	T	T	T	T	T
	C	T	T	0	0	C	C	0	T	T	T	0	T	0	T	T	T	C	T	T	T	T	T	T	T	T	T	T	T	T	T	T	T	T	C	T	C	C	T	C	C	T	T	0	T	T	T	T	T
PZE-101000167	G	G	0	0	0	G	G	0	0	G	G	0	G	0	G	G	G	G	G	0	G	G	G	0	G	G	G	G	G	G	A	G	G	G	G	G	G	G	G	G	0	A	G	G	A	G	G	G	G
	G	G	0	0	0	G	G	0	0	G	G	0	G	0	G	G	G	G	G	0	G	G	G	0	G	G	G	G	G	G	A	G	G	G	G	G	G	G	G	G	0	A	G	G	A	G	G	G	G
PZE-101000169	T	C	C	C	C	T	T	C	C	C	T	C	C	C	C	C	C	T	C	C	T	T	C	0	C	C	T	T	C	T	C	T	C	T	T	C	T	T	T	T	C	0	C	T	C	T	T	C	T
	T	C	C	C	C	T	T	C	C	C	T	C	C	C	C	C	C	T	C	C	T	T	C	0	C	C	T	T	C	T	C	T	C	T	T	C	T	T	T	T	C	0	C	T	C	T	T	C	T
PZE-101000209	A	A	0	G	G	A	A	G	A	A	A	G	A	A	A	A	A	A	A	G	A	A	G	0	G	A	A	A	A	A	G	A	G	A	A	A	A	A	A	A	G	0	A	A	G	A	A	G	A
	A	A	0	G	G	A	A	G	A	A	A	G	A	A	A	A	A	A	A	G	A	A	G	0	G	A	A	A	A	A	G	A	G	A	A	A	A	A	A	A	G	0	G	A	G	A	A	G	A
PZE-101000256	G	C	0	C	C	G	G	C	G	C	G	C	C	C	C	G	G	G	C	G	G	G	C	C	G	G	G	G	G	G	C	G	C	G	G	G	G	C	G	G	G	C	C	G	C	G	G	C	G
	G	C	0	C	C	G	G	C	G	C	G	C	C	C	C	G	G	G	C	G	G	G	C	C	G	G	G	G	G	G	C	G	C	G	G	G	G	C	G	G	G	C	C	G	C	G	G	C	G
PZE-101000301	G	G	0	G	0	A	G	G	G	G	A	G	G	G	G	G	G	G	G	G	G	A	G	0	G	G	A	A	G	G	G	0	G	A	0	G	0	G	G	A	G	G	G	A	G	0	A	G	A
	G	G	0	G	0	A	G	G	G	G	A	G	G	G	G	G	G	G	G	G	G	A	G	0	G	G	A	A	G	G	G	0	G	A	0	G	0	G	G	A	G	G	G	A	G	0	A	G	A
PZE-101000344	C	C	C	C	C	T	C	C	0	C	0	C	C	C	C	C	C	C	C	C	C	C	C	0	T	C	C	C	C	C	C	T	C	T	T	C	T	T	C	C	C	C	C	T	C	C	T	C	0
	C	C	C	C	C	T	C	C	0	C	0	C	C	C	C	C	C	C	C	C	C	C	C	0	T	C	C	C	C	C	C	T	C	T	T	C	T	T	C	C	C	C	C	C	C	C	T	C	0
PZE-101000348	G	A	G	G	G	A	G	G	G	G	A	G	A	G	A	A	G	G	A	A	G	A	A	0	A	G	A	G	G	G	A	A	A	A	A	G	A	A	G	A	A	A	A	A	A	G	A	A	0
	G	A	G	G	G	A	G	G	G	G	A	G	A	G	A	A	G	G	A	A	G	A	A	0	A	G	A	G	G	G	A	A	A	A	A	G	A	A	G	A	A	A	A	A	A	G	A	A	0
PZE-101000349	T	G	0	T	T	T	T	T	T	T	T	T	G	T	G	T	T	T	G	T	T	T	T	T	T	T	T	T	T	T	T	T	T	T	T	T	T	T	T	G	T	T	G	T	T	T	T	T	T
	T	G	0	T	T	T	T	T	T	T	T	T	G	T	G	T	T	T	G	T	T	T	T	T	T	T	T	T	T	T	T	T	T	T	T	T	T	T	T	G	T	T	G	T	T	T	T	T	T
PZE-101000360	C	T	C	C	C	C	C	C	C	C	C	C	T	C	T	T	C	C	T	T	C	C	C	C	C	C	C	C	C	C	C	C	C	C	C	C	C	C	C	T	T	C	T	C	C	C	C	C	C
	C	T	C	C	C	C	C	C	C	C	C	C	T	C	T	T	C	C	T	T	C	C	C	C	C	C	C	C	C	C	C	C	C	C	C	C	C	C	C	T	T	C	T	C	C	C	C	C	C
PZE-101000359	C	C	C	C	C	C	C	C	C	C	C	C	C	C	C	C	C	C	C	C	C	C	A	A	C	C	C	C	C	C	0	C	0	C	C	C	C	C	C	C	C	A	C	C	A	C	C	A	C
	C	C	C	C	C	C	C	C	C	C	C	C	C	C	C	C	C	C	C	C	C	C	A	A	C	C	C	C	C	C	0	C	0	C	C	C	C	C	C	C	C	A	C	C	A	C	C	A	C
PZE-101000370	A	C	0	A	A	A	A	A	A	A	A	A	C	A	C	C	A	A	C	C	A	A	A	A	A	A	A	A	A	A	A	A	A	A	A	A	A	A	A	C	C	A	C	A	A	A	A	A	A
	A	C	0	A	A	A	A	A	A	A	A	A	C	A	C	C	A	A	C	C	A	A	A	A	A	A	A	A	A	A	A	A	A	A	A	A	A	A	A	C	C	A	C	A	A	A	A	A	A
PZE-101000424	C	A	A	A	A	A	C	A	A	C	A	A	A	C	A	A	A	C	A	A	C	A	A	A	A	A	A	C	A	C	A	C	A	C	A	A	A	C	A	A	A	A	A	A	A	C	A	A	C
	C	A	A	A	A	A	C	A	A	C	A	A	A	C	A	A	A	C	A	A	C	A	A	A	A	A	A	C	A	C	A	C	A	C	A	A	A	C	A	A	A	A	A	A	A	C	A	A	C
PZE-101000442	G	T	T	T	T	G	G	T	G	G	G	T	T	G	T	G	G	G	T	T	G	G	G	G	G	G	G	G	G	G	G	G	G	G	G	G	G	G	G	T	G	G	T	G	G	G	G	G	G
	G	T	T	T	T	G	G	T	G	G	G	T	T	G	T	G	G	G	T	T	G	G	G	G	G	G	G	G	G	G	G	G	G	G	G	G	G	G	G	T	G	G	T	G	G	G	G	G	G
PZE-101000449	T	T	T	T	T	T	C	T	T	C	C	T	T	C	T	T	T	T	T	T	T	C	C	0	T	T	C	T	C	T	C	T	C	T	T	T	T	T	T	T	T	C	T	0	C	T	T	C	T
	T	T	T	T	T	T	C	T	T	C	C	T	T	C	T	T	T	T	T	T	T	C	C	0	T	T	C	T	C	T	C	T	C	T	T	T	T	T	T	T	T	C	T	0	C	T	T	C	T
PZE-101000450	G	G	G	G	G	G	G	G	G	G	G	G	G	G	G	G	G	G	G	G	G	G	A	0	G	G	G	G	G	G	A	G	A	G	G	G	G	G	G	G	G	G	G	G	A	G	G	A	G
	G	G	G	G	G	G	G	G	G	G	G	G	G	G	G	G	G	G	G	G	G	G	A	0	G	G	G	G	G	G	A	G	A	G	G	G	G	G	G	G	G	G	G	G	A	G	G	A	G
PZE-101000451	G	A	A	0	0	A	G	0	A	G	A	0	A	G	A	A	A	G	A	A	A	G	G	0	A	A	G	G	G	A	G	A	G	A	A	A	A	A	A	A	G	G	A	A	G	G	A	G	0
	G	A	A	0	0	A	G	0	A	G	G	0	A	G	A	A	A	G	A	A	A	G	G	0	A	A	G	G	G	A	G	A	G	A	A	A	A	A	A	A	G	G	A	G	G	G	A	G	0
PZE-101000530	C	C	C	C	C	C	C	C	T	C	C	C	C	C	C	C	C	C	C	C	C	C	C	C	T	C	C	C	C	C	C	T	C	T	T	T	C	C	C	T	C	C	C	0	C	C	C	C	0
	C	C	C	C	C	C	C	C	T	C	C	C	C	C	C	C	C	C	C	C	C	C	C	C	C	C	C	C	C	C	C	T	C	T	T	C	C	C	C	T	C	C	C	0	C	C	C	C	0
PZE-101000557	G	G	G	G	G	G	G	G	G	G	G	G	G	G	G	G	G	G	G	G	G	G	A	G	G	G	G	G	G	G	A	G	A	G	G	G	G	G	G	G	G	A	G	G	A	G	G	A	G
	G	G	G	G	G	G	G	G	G	G	G	G	G	G	G	G	G	G	G	G	G	G	A	G	G	G	G	G	G	G	A	G	A	G	G	G	G	G	G	G	G	A	G	G	A	G	G	A	G
PZE-101000610	C	0	C	C	C	C	C	0	C	C	C	C	T	C	T	C	C	C	0	C	C	0	C	C	C	C	C	C	C	C	C	C	C	C	C	C	C	C	C	C	C	C	0	C	C	C	C	C	C
	C	0	C	C	C	C	C	0	C	C	C	C	T	C	T	C	C	C	0	C	C	0	C	C	C	C	C	C	C	C	C	C	C	C	C	C	C	C	C	C	C	C	0	C	C	C	C	C	C
PZE-101000659	C	C	C	C	C	C	C	C	T	C	C	C	C	C	C	C	T	C	C	T	C	C	C	C	T	T	0	C	C	C	C	C	C	C	T	C	C	C	T	T	C	C	C	0	C	C	C	C	C
	C	C	C	C	C	C	C	C	T	C	C	C	C	C	C	C	T	C	C	T	C	C	C	C	T	T	0	C	C	C	C	C	C	C	T	C	C	C	T	T	C	C	C	0	C	C	C	C	C
PZE-101000673	C	C	C	C	C	C	C	C	C	C	T	C	C	C	C	C	C	C	C	T	C	C	C	0	T	C	C	C	C	C	C	T	C	T	T	T	C	C	C	T	C	C	C	T	C	C	T	C	0
	C	C	C	C	C	C	C	C	C	C	T	C	C	C	C	C	C	C	C	T	C	C	C	0	T	C	C	C	C	C	C	T	C	T	T	T	C	C	C	T	C	C	C	T	C	C	T	C	0
PZE-101000740	C	C	C	C	C	T	C	C	C	T	C	C	C	T	C	C	C	T	C	T	C	C	C	C	C	C	0	C	C	T	C	T	C	T	C	C	T	T	C	T	C	T	C	C	C	C	T	C	T
	C	C	C	C	C	T	C	C	C	T	C	C	C	T	C	C	C	T	C	T	C	C	C	C	C	C	0	C	C	T	C	T	C	T	C	C	T	T	C	T	C	T	C	C	C	C	T	C	C
PZE-101000754	C	T	C	T	C	C	C	C	T	C	0	C	C	C	T	C	T	C	C	C	C	T	T	C	C	C	C	T	C	C	T	T	T	T	C	C	C	C	T	C	T	C	T	C	C	C	C	C	0
	C	T	C	T	C	C	C	C	T	C	0	C	C	C	T	C	T	C	C	C	C	T	T	C	C	C	C	T	C	C	T	T	T	T	C	C	C	C	T	C	T	C	T	C	C	C	C	C	0
PZE-101000788	C	C	C	T	C	C	C	C	C	C	C	C	C	C	C	C	T	C	C	C	C	C	C	C	C	C	C	C	C	C	T	C	C	C	C	C	C	T	T	C	T	C	C	C	T	C	T	T	C
	C	C	C	T	C	C	C	C	C	C	C	C	C	C	C	C	T	C	C	C	C	C	C	C	C	C	C	C	C	C	T	C	C	C	C	C	C	T	T	C	T	C	C	C	T	C	T	T	C
PZE-101001044	G	A	G	A	G	G	G	A	G	A	G	G	G	A	G	G	G	G	G	G	G	G	A	G	A	G	A	A	A	A	A	G	G	G	G	G	A	G	G	A	G	G	A	0	A	A	G	A	0
	G	A	G	A	G	G	G	A	G	A	G	G	G	A	G	G	G	G	G	G	G	G	A	G	A	G	A	A	A	A	A	G	G	G	G	G	A	G	G	A	G	G	A	0	A	A	G	A	0
PZE-101001094	C	T	T	T	T	T	T	T	T	T	T	T	C	T	T	T	C	T	T	T	T	T	C	T	T	T	T	T	T	T	T	C	C	C	T	C	T	T	T	T	T	C	T	T	T	T	T	C	T
	C	T	T	T	T	T	T	T	T	T	T	T	C	T	T	T	C	T	T	T	T	T	C	T	T	T	T	T	T	T	T	C	C	C	T	C	T	T	T	T	T	C	T	T	T	T	T	C	T
PZE-101001103	T	G	T	G	T	T	T	G	T	T	T	T	G	G	T	T	T	T	T	T	T	T	T	T	T	T	T	T	T	T	T	G	T	G	T	G	T	T	T	T	T	T	G	T	T	T	T	T	T
	T	G	T	G	T	T	T	G	T	T	T	T	G	G	T	T	T	T	T	T	T	T	T	T	T	T	T	T	T	T	T	G	T	G	T	G	T	T	T	T	T	T	G	T	T	T	T	T	T
PZE-101001107	C	C	C	C	A	A	C	C	A	A	A	A	C	C	A	A	A	A	A	A	A	A	C	0	C	A	A	C	C	A	C	C	C	C	A	C	C	C	A	A	C	A	A	C	C	A	C	C	A
	C	C	C	C	A	A	C	C	A	A	A	A	C	C	A	A	A	A	A	A	A	A	C	0	C	A	A	C	C	A	C	C	C	C	A	C	C	C	A	A	C	A	A	C	C	A	C	C	C
PZE-101001108	C	C	T	C	C	C	C	C	C	C	C	C	C	C	C	C	C	C	C	C	C	C	C	0	C	C	C	C	C	C	C	C	C	C	C	C	C	C	C	C	C	C	C	C	C	C	T	C	C
	C	C	T	C	C	C	C	C	C	C	C	C	C	C	C	C	C	C	C	C	C	C	C	0	C	C	C	C	C	C	C	C	C	C	C	C	C	C	C	C	C	C	C	C	C	C	T	C	C
PZE-101001110	G	G	G	G	G	G	G	G	G	G	G	G	G	G	G	G	G	G	G	G	G	G	G	G	G	G	G	G	A	G	G	G	G	G	G	G	A	A	G	G	G	G	G	0	A	G	G	A	A
	G	G	G	G	G	G	G	G	G	G	G	G	G	G	G	G	G	G	G	G	G	G	G	G	G	G	G	G	A	G	G	G	G	G	G	G	A	A	G	G	G	G	G	0	A	G	G	A	G
PZE-101001114	A	G	G	G	A	A	A	G	A	A	A	A	G	G	A	A	A	A	A	A	A	A	G	0	A	A	A	G	A	A	G	G	A	G	A	G	A	A	A	A	A	G	A	A	A	A	G	A	A
	A	G	G	G	A	A	A	G	A	A	A	A	G	G	A	A	A	A	A	A	A	A	G	0	A	A	A	G	A	A	G	G	A	G	A	G	A	A	A	A	A	G	A	A	A	A	G	A	A
PZE-101001115	C	T	T	T	C	C	C	T	C	C	C	C	T	T	C	C	C	C	C	C	C	C	T	0	C	C	C	T	C	C	T	T	C	T	C	T	C	C	C	C	C	T	C	C	C	C	T	C	C
	C	T	T	T	C	C	C	T	C	C	C	C	T	T	C	C	C	C	C	C	C	C	T	0	C	C	C	T	C	C	T	T	C	T	C	T	C	C	C	C	C	T	C	C	C	C	T	C	C
PZE-101001116	A	A	A	A	G	G	A	A	G	G	G	G	A	A	A	G	A	A	G	G	G	G	A	0	A	G	A	A	A	G	A	A	A	A	G	A	A	A	G	A	A	A	G	A	A	G	A	A	A
	A	A	A	A	G	G	A	A	G	G	G	G	A	A	A	G	A	A	G	G	G	G	A	0	A	G	A	A	A	G	A	A	A	A	G	A	A	A	G	A	A	A	G	A	A	G	A	A	G
PZE-101001265	0	C	C	C	C	C	0	C	C	C	C	C	C	C	C	C	C	C	C	C	C	C	C	C	C	0	C	C	T	C	C	C	C	C	C	C	C	C	C	C	0	C	T	C	C	C	C	T	C
	0	C	C	C	C	C	0	C	C	C	C	C	C	C	C	C	C	C	C	C	C	C	C	C	C	0	C	C	T	C	C	C	C	C	C	C	C	C	C	C	0	C	T	C	C	C	C	T	C
PZE-101001280	G	G	A	G	G	G	A	A	G	G	G	A	A	G	G	G	A	A	G	A	A	G	A	A	A	A	A	A	A	A	A	A	A	A	A	A	A	A	A	A	A	A	A	0	A	A	G	A	A
	G	G	A	G	G	G	A	A	G	G	G	A	A	G	G	G	A	A	G	A	A	G	A	A	A	A	A	A	A	A	A	A	A	A	A	A	A	A	A	A	A	A	A	0	A	A	G	A	A
PZE-101001380	C	C	C	C	T	C	T	T	C	C	C	T	T	C	C	C	C	C	C	T	C	C	T	0	C	T	T	C	C	C	T	C	T	C	T	C	C	C	T	C	T	T	C	0	T	T	C	T	T
	C	C	C	C	T	C	T	T	C	C	C	T	T	C	C	C	C	C	C	T	C	C	T	0	C	T	T	C	C	C	T	C	T	C	T	C	C	C	T	C	T	T	C	0	T	T	C	T	C
PZE-101001587	T	T	T	T	C	C	T	T	T	T	T	T	T	T	T	T	T	T	T	T	C	T	T	T	T	T	T	T	T	T	T	T	T	T	C	T	T	T	T	C	T	C	T	T	C	T	C	T	0
	T	T	T	T	C	C	T	T	T	T	T	T	T	T	T	T	T	T	T	T	C	T	T	T	T	T	T	T	T	T	T	T	T	T	C	T	T	T	T	C	T	C	T	T	C	T	C	T	0
PZE-101002081	A	G	A	G	A	G	G	A	0	A	0	A	G	A	G	G	G	G	A	G	G	G	G	G	G	A	G	G	G	G	G	G	G	G	G	G	A	G	G	G	G	G	G	A	G	G	G	G	G
	A	G	G	G	A	G	G	A	0	A	0	A	G	A	G	G	G	G	A	G	G	G	G	G	G	A	G	G	G	G	G	G	G	G	G	G	A	G	G	G	G	G	G	A	G	G	G	G	G
PZE-101002282	T	T	T	T	C	C	T	T	T	T	C	T	C	T	C	T	T	T	C	T	C	C	C	T	T	T	C	C	C	C	C	T	C	T	C	C	C	C	T	C	C	T	T	T	T	C	T	T	T
	T	T	T	T	C	C	T	T	T	T	C	T	C	T	C	T	T	T	C	T	C	C	C	T	C	T	C	C	C	C	C	T	C	T	C	C	C	C	T	C	C	T	T	T	T	C	C	T	C
PZE-101002367	T	T	G	T	T	G	G	T	T	G	T	G	T	T	G	G	T	T	T	G	T	T	G	0	T	T	T	T	T	G	G	G	G	G	T	G	T	G	T	T	T	T	T	T	T	G	T	T	0
	T	T	G	T	T	G	G	T	T	G	T	G	T	T	G	G	T	T	T	G	T	T	G	0	T	T	T	T	T	G	G	G	G	G	T	G	T	G	T	T	T	T	T	T	T	G	T	T	0
PZE-101002887	C	C	A	C	C	A	C	C	A	C	C	C	C	A	C	C	A	C	C	C	C	C	A	C	C	C	A	C	A	C	C	A	C	A	A	C	C	C	C	A	C	C	A	A	C	C	A	A	A
	C	C	C	C	C	A	C	C	A	C	C	C	C	A	C	C	A	C	C	C	C	C	A	C	C	C	A	C	A	C	C	A	C	A	A	C	C	C	C	A	C	C	A	A	C	C	A	A	C
PZE-101002919	T	C	T	T	T	T	T	C	C	T	C	T	T	T	C	T	C	C	T	C	T	T	T	T	C	T	C	T	T	T	C	T	C	C	T	T	C	T	T	T	T	C	C	T	C	T	T	C	T
	T	C	C	T	T	T	T	C	C	T	C	T	T	T	C	T	C	C	T	C	T	T	T	T	C	T	C	T	T	T	C	T	C	C	T	T	C	T	T	T	T	C	C	T	C	T	T	C	T
PZE-101003026	A	A	A	G	G	G	A	A	A	A	A	A	A	G	A	A	A	G	A	G	A	A	G	0	A	G	A	G	G	G	G	A	G	G	G	G	G	G	A	A	A	G	A	G	A	G	G	G	0
	A	A	G	G	G	G	A	A	A	A	A	A	A	G	A	A	A	G	A	G	A	A	G	0	A	G	A	G	G	G	G	A	G	G	G	G	G	G	A	A	A	G	A	G	A	G	G	G	0
PZE-101003031	C	C	C	C	C	C	C	C	C	C	0	C	T	C	C	T	C	C	C	C	C	C	C	C	C	C	T	C	C	C	C	C	C	C	C	C	C	C	C	C	T	C	T	C	T	C	C	C	C
	C	C	C	C	C	C	C	C	C	C	0	C	T	C	C	T	C	C	C	C	C	C	C	C	C	C	T	C	C	C	C	C	C	C	C	C	C	C	C	C	T	C	T	C	T	C	C	C	C
PZE-101003115	A	G	A	G	A	A	A	A	0	A	A	G	G	G	A	A	A	A	A	A	A	A	A	A	A	G	A	A	A	A	A	A	A	A	G	A	A	A	G	G	A	A	A	A	A	A	A	A	A
	A	G	A	G	A	A	A	A	0	A	A	G	G	G	A	A	A	A	A	A	A	A	A	A	A	G	A	A	A	A	A	A	A	A	G	A	A	A	G	G	A	A	A	A	A	A	A	A	G
PZE-101003133	A	G	A	G	A	G	A	A	A	A	A	G	A	G	A	A	A	A	A	G	A	A	A	A	A	G	G	A	A	A	G	A	A	A	G	A	A	A	G	G	A	A	A	G	A	A	A	A	0
	A	G	G	G	A	G	A	A	A	A	A	G	A	G	A	A	A	A	A	G	A	A	A	A	A	G	G	A	A	A	G	A	A	A	G	A	A	A	G	G	A	A	A	G	A	A	A	A	0
PZE-101003135	A	A	A	A	C	A	A	C	C	A	A	A	C	A	A	A	C	A	C	A	A	A	C	0	C	A	A	C	C	C	A	C	A	A	A	A	C	A	A	A	C	C	A	A	C	C	A	A	A
	A	A	C	A	C	A	A	C	C	A	A	A	C	A	A	A	C	A	C	A	A	A	C	0	C	A	A	C	C	C	A	C	A	A	A	A	C	A	A	A	C	C	A	A	C	C	A	A	A
PZE-101003141	C	A	C	C	C	C	A	C	C	C	C	C	C	C	A	A	C	A	C	A	A	A	C	C	C	A	0	A	C	C	A	C	C	A	C	A	C	A	C	C	C	0	A	0	C	C	A	0	C
	C	A	C	C	C	C	A	C	C	C	C	C	C	C	A	A	C	A	C	A	A	A	C	C	C	A	0	A	C	C	A	C	C	A	C	A	C	A	C	C	C	0	A	0	C	C	A	0	C
PZE-101003785	A	G	A	G	G	A	A	G	A	G	0	G	A	G	G	A	A	A	G	A	A	A	A	A	A	A	A	A	G	A	G	A	0	A	A	A	A	A	G	A	A	A	G	A	A	A	A	A	A
	A	G	A	G	G	A	A	G	A	G	0	G	A	G	G	A	A	A	G	A	A	A	A	A	A	A	A	A	G	A	G	A	0	A	A	A	A	A	G	A	A	A	G	A	A	A	A	A	A
PZE-101004328	C	C	C	C	C	C	C	C	C	C	0	C	C	C	C	C	C	C	C	C	C	C	C	C	C	C	C	C	C	C	C	C	C	C	C	C	C	C	C	C	C	C	C	C	C	C	C	C	A
	C	C	C	C	C	C	C	C	C	C	0	C	C	C	C	C	C	C	C	C	C	C	C	C	C	C	C	C	C	C	C	C	C	C	C	C	C	C	C	C	C	C	C	C	C	C	C	C	C
PZE-101004337	T	G	G	G	G	T	T	T	T	G	T	G	T	G	T	G	G	G	G	T	T	T	T	0	T	G	T	T	T	T	T	T	G	T	T	G	T	T	G	G	G	G	G	T	T	T	T	T	0
	T	G	G	G	G	T	T	T	T	G	T	G	T	G	T	G	G	G	G	T	T	T	T	0	T	G	T	T	T	T	T	T	G	T	T	G	T	T	G	G	G	G	G	T	T	T	T	T	0
PZE-101004387	0	T	G	G	T	T	T	G	G	0	0	T	T	G	G	G	T	G	T	G	T	T	G	G	T	G	G	G	T	G	G	G	G	G	T	G	T	G	T	T	T	G	T	T	T	T	G	G	T
	0	T	G	G	T	T	T	G	G	0	0	T	T	G	G	G	T	G	T	G	T	T	G	G	T	G	G	G	T	G	G	G	G	G	T	G	T	G	T	T	T	G	T	T	T	T	G	G	T
PZE-101004923	T	T	T	T	T	G	T	T	T	T	T	T	T	T	T	T	T	T	T	T	T	T	G	T	T	T	T	G	T	T	T	T	T	T	T	G	T	T	T	T	T	T	T	T	G	T	T	G	0
	T	T	T	T	T	G	T	T	T	T	T	T	T	T	T	T	T	T	T	T	T	T	G	T	T	T	T	G	T	T	T	T	T	T	T	G	T	T	T	T	T	T	T	T	G	T	T	G	0
PZE-101005032	0	0	A	A	A	A	A	A	0	0	G	A	A	G	A	A	0	G	A	G	G	G	A	A	A	A	G	A	G	A	G	G	G	G	0	A	0	A	G	A	0	A	G	A	G	A	A	A	A
	0	0	A	A	A	A	A	A	0	0	G	A	A	G	A	A	0	G	A	G	G	G	A	A	A	A	G	A	G	A	G	G	G	G	0	A	0	A	G	A	0	A	G	A	G	A	A	A	A
PZE-101005818	C	T	C	T	T	C	T	T	T	T	0	C	C	T	C	T	C	C	C	C	C	C	T	0	C	C	T	C	C	T	T	T	T	C	C	0	C	C	C	T	C	T	C	T	T	T	T	C	T
	C	T	C	T	T	C	T	T	T	T	0	C	C	T	C	T	C	C	C	C	C	C	T	0	C	C	T	C	C	T	T	T	T	C	C	0	C	C	C	T	C	T	C	T	T	T	T	C	T
PZE-101005806	G	G	G	G	G	G	G	G	G	G	G	G	G	G	G	G	G	0	G	G	G	G	G	0	G	0	G	G	G	A	G	G	G	G	G	G	G	G	G	G	G	G	G	A	G	G	G	A	A
	G	G	G	G	G	G	G	G	G	G	G	G	G	G	G	G	G	0	G	G	G	G	G	0	G	0	G	G	G	A	G	G	G	G	G	G	G	G	G	G	G	G	G	A	G	G	G	A	G
PZE-101005765	T	C	C	C	C	T	T	C	C	C	T	T	T	C	T	T	C	C	T	T	T	T	T	0	T	C	C	T	C	C	T	C	C	T	C	T	C	C	C	T	C	T	C	T	T	T	T	T	T
	T	C	C	C	C	T	T	C	C	C	T	T	T	C	T	T	C	C	T	T	T	T	T	0	T	C	C	T	C	C	T	C	C	T	C	T	C	C	C	T	C	T	C	T	T	T	T	T	T
PZE-101005766	T	T	T	C	C	T	T	T	C	T	T	T	T	C	T	T	T	C	T	T	T	T	T	0	T	T	C	T	T	C	T	T	T	T	T	T	C	C	C	T	C	T	C	T	T	T	T	T	T
	T	T	T	C	C	T	T	T	C	T	T	T	T	C	T	T	T	C	T	T	T	T	T	0	T	T	C	T	T	C	T	T	T	T	T	T	C	C	C	T	C	T	C	T	T	T	T	T	T
PZE-101005770	G	A	G	A	A	G	G	A	A	A	G	G	G	A	G	G	A	A	G	G	G	G	G	0	G	G	A	G	G	G	G	G	A	G	A	G	A	A	A	G	A	G	A	G	G	G	G	G	G
	G	A	G	A	A	G	G	A	A	A	G	G	G	A	G	G	A	A	G	G	G	G	G	0	G	G	A	G	G	G	G	G	A	G	A	G	A	A	A	G	A	G	A	G	G	G	G	G	G
PZE-101006745	A	G	G	A	A	G	0	G	A	G	G	A	A	A	G	A	A	A	A	A	A	G	A	A	A	A	G	A	A	A	A	A	A	A	A	0	A	A	A	A	G	A	A	A	A	A	A	A	A
	A	G	G	A	A	G	0	G	A	G	G	A	A	A	G	A	A	A	A	A	A	G	A	A	A	A	G	A	A	A	A	A	A	A	A	0	A	A	A	A	G	A	A	A	A	A	A	A	A
PZE-101006890	A	G	A	A	A	A	A	A	0	A	0	A	A	G	A	A	0	A	A	G	A	A	G	A	G	A	0	A	A	A	G	A	A	0	G	G	A	A	A	A	G	A	G	A	G	A	A	G	A
	A	G	A	A	A	A	A	A	0	A	0	A	A	G	A	A	0	A	A	G	A	A	G	A	G	A	0	A	A	A	G	A	A	0	G	G	A	A	A	A	G	A	G	A	G	A	A	G	A
PZE-101007769	C	C	T	C	T	T	C	C	C	C	T	C	C	C	C	C	C	T	C	T	T	T	C	0	T	C	C	C	T	T	C	T	T	0	T	T	T	C	C	0	C	C	C	C	T	T	C	T	T
	C	C	T	C	T	T	C	C	C	C	T	C	C	C	C	C	C	T	C	T	T	T	C	0	T	C	C	C	T	T	C	T	T	0	T	T	T	C	C	0	C	C	C	C	T	T	C	T	T
PZE-101008685	G	G	G	G	G	G	G	G	G	G	G	G	G	G	G	G	G	G	G	G	G	G	G	G	G	G	G	G	G	G	G	G	G	G	G	G	G	G	G	T	G	G	G	G	G	G	G	G	G
	G	G	G	G	G	G	G	G	G	G	G	G	G	G	G	G	G	G	G	G	G	G	G	G	G	G	G	G	G	G	G	G	G	G	G	G	G	G	G	T	G	G	G	G	G	G	G	G	G
PZE-101009163	C	C	T	C	T	T	T	T	T	T	0	C	T	C	T	C	C	C	C	C	0	C	T	T	C	0	T	T	T	T	C	T	T	T	T	T	C	C	C	C	C	C	T	C	T	T	T	T	T
	C	C	T	C	T	T	T	T	T	T	0	C	T	C	T	C	C	C	C	C	0	C	T	T	C	0	T	T	T	T	C	T	T	T	T	T	C	C	C	C	C	C	T	C	T	T	T	T	T
PZE-101009528	T	T	T	T	C	C	T	T	T	T	0	T	T	T	T	T	T	T	T	T	T	C	T	T	T	T	T	C	C	T	T	C	C	C	C	T	T	T	T	T	T	T	T	C	T	T	T	T	T
	T	T	T	T	C	C	T	T	T	T	0	T	T	T	T	T	T	T	T	T	T	C	T	T	T	T	T	C	C	T	T	C	C	C	C	T	T	T	T	T	T	T	T	C	T	T	T	T	T
PZE-101009312	T	C	C	C	T	C	C	C	T	C	C	T	T	C	C	C	C	C	0	T	C	C	C	C	C	C	C	C	C	C	C	T	C	C	T	C	T	C	C	T	0	C	T	C	C	T	T	C	C
	T	C	C	C	T	C	C	C	T	C	C	T	T	C	C	C	C	C	0	T	C	C	C	C	C	C	C	C	C	C	C	T	C	C	T	C	T	C	C	T	0	C	T	C	C	T	T	C	C
PZE-101009310	T	C	C	C	T	C	C	C	T	C	C	T	T	C	C	T	C	C	C	C	C	C	C	C	C	C	C	C	C	C	C	C	C	C	T	C	C	C	C	T	C	C	T	C	C	C	T	C	C
	T	C	C	C	T	C	C	C	T	C	C	T	T	C	C	T	C	C	C	C	C	C	C	C	C	C	C	C	C	C	C	C	C	C	T	C	C	C	C	T	C	C	T	C	C	C	T	C	C
PZE-101009215	A	G	A	G	A	A	G	A	A	A	0	A	A	G	A	A	G	G	A	A	G	G	A	A	A	G	A	A	G	A	A	A	A	A	G	A	A	A	G	A	A	A	A	A	A	A	A	A	A
	A	G	A	G	A	A	G	A	A	A	0	A	A	G	A	A	G	G	A	A	G	G	A	A	A	G	A	A	G	A	A	A	A	A	G	A	A	A	G	A	A	A	A	A	A	A	A	A	A
PZE-101009670	C	C	C	C	C	T	C	T	T	C	0	C	C	C	C	C	C	C	C	C	C	C	C	C	C	C	C	C	C	C	C	C	C	C	C	C	C	C	C	C	C	C	T	C	C	C	C	C	C
	C	C	C	C	C	T	C	T	T	C	0	C	C	C	C	C	C	C	C	C	C	C	C	C	C	C	C	C	C	C	C	C	C	C	C	C	C	C	C	C	C	C	T	C	C	C	C	C	C
PZE-101010560	G	T	G	G	T	G	G	G	G	T	0	G	G	G	G	G	G	T	G	T	G	T	T	T	T	G	G	G	T	G	G	T	G	G	G	G	G	T	G	G	G	T	G	T	G	T	T	G	0
	G	T	G	G	T	G	G	G	G	T	0	G	G	G	G	G	G	T	G	T	G	T	T	G	T	G	G	G	T	G	G	T	G	G	G	G	G	T	G	G	G	T	G	T	G	T	T	G	0
PZE-101010649	T	G	0	G	G	G	G	G	G	G	G	G	G	0	G	G	G	G	G	G	G	0	0	0	0	T	G	T	G	0	T	T	G	T	G	0	G	T	G	0	G	G	G	G	T	G	G	G	G
	T	G	0	G	G	G	G	G	G	G	G	G	G	0	G	G	G	G	G	G	G	0	0	0	0	T	G	T	G	0	T	T	G	T	G	0	G	T	G	0	G	G	G	G	T	G	G	G	G
PZE-101010821	G	G	G	A	A	G	G	G	G	A	G	A	A	A	A	A	G	G	G	G	G	G	A	0	G	G	A	G	G	G	G	G	G	G	G	G	G	G	G	G	G	G	A	G	G	G	G	G	G
	G	G	G	A	A	G	G	G	G	A	G	A	A	A	A	A	G	G	G	G	G	G	A	0	G	G	A	G	G	G	G	G	G	G	G	G	G	G	G	G	G	G	A	G	G	G	G	G	G
PZE-101010917	A	A	A	A	A	A	C	C	A	C	0	A	A	C	A	A	C	A	A	A	A	C	A	A	A	A	A	A	C	A	A	A	A	A	C	C	A	C	A	A	A	A	A	C	A	A	A	A	A
	A	A	A	A	A	A	C	C	A	C	0	A	A	C	A	A	C	A	A	A	A	C	A	A	A	A	A	A	C	A	A	A	A	A	C	C	A	C	A	A	A	A	A	C	A	A	A	A	A
PZE-101011048	T	T	T	T	T	T	T	T	T	T	T	T	C	T	T	T	T	T	T	C	T	T	C	C	T	T	T	C	C	T	T	C	T	C	T	T	T	T	T	T	T	T	T	C	T	T	T	T	T
	T	T	T	T	T	T	T	T	T	T	T	T	C	T	T	T	T	T	T	C	T	T	C	C	T	T	T	C	C	T	T	C	T	C	T	T	T	T	T	T	T	T	T	C	T	T	T	T	T
PZE-101011197	A	G	A	A	A	A	A	A	A	A	A	A	A	A	A	A	A	A	A	A	A	A	A	A	G	A	A	A	A	A	A	G	A	A	A	A	G	A	A	G	A	G	A	A	A	A	A	G	A
	A	G	A	A	A	A	A	A	A	A	A	A	A	A	A	A	A	A	A	A	A	A	A	A	G	A	A	A	A	A	A	G	A	A	A	A	G	A	A	G	A	G	A	A	A	A	A	G	A
PZE-101011230	A	A	A	0	A	A	A	A	0	A	A	G	A	A	G	A	A	A	A	A	A	A	A	A	A	A	A	G	A	0	A	A	A	A	A	A	A	A	A	A	A	A	A	A	G	G	A	A	A
	A	A	A	0	A	A	A	A	0	A	A	G	A	A	G	A	A	A	A	A	A	A	A	A	A	A	A	G	A	0	A	A	A	A	A	A	A	A	A	A	A	A	A	A	G	G	A	A	A
PZE-101011906	C	T	C	C	C	T	T	T	C	C	0	C	C	T	C	T	C	T	C	T	0	T	T	T	T	C	T	T	T	C	T	T	T	C	C	C	T	C	C	C	T	C	C	T	C	T	T	T	C
	C	T	C	C	C	T	T	T	C	C	0	C	C	T	C	T	C	T	C	T	0	T	T	T	T	C	T	T	T	C	T	T	T	C	C	C	T	C	C	C	T	C	C	T	C	T	T	T	C
PZE-101012517	A	A	G	A	G	A	A	A	A	A	A	G	A	A	A	A	G	G	G	A	G	A	A	A	G	A	A	G	A	A	G	A	A	A	G	A	G	G	G	G	G	G	A	G	A	G	A	A	G
	A	A	G	A	G	A	A	A	A	A	A	G	A	A	A	A	G	G	G	A	G	A	A	A	G	A	A	G	A	A	G	A	A	A	G	A	G	G	G	G	G	G	A	G	A	G	A	A	G
PZE-101013598	T	T	T	T	T	T	T	T	T	T	T	T	T	T	T	T	T	T	T	T	T	T	T	T	C	T	T	C	T	T	T	T	T	T	T	T	T	T	T	T	T	T	T	T	T	C	T	T	T
	T	T	T	T	T	T	T	T	T	T	T	T	T	T	T	T	T	T	T	T	T	T	T	T	C	T	T	C	T	T	T	T	T	T	T	T	T	T	T	T	T	T	T	T	T	C	T	T	T
PZE-101013646	G	G	G	G	G	G	G	G	G	G	G	G	G	G	G	G	G	G	G	G	G	G	G	G	A	G	G	G	G	G	G	G	G	A	A	A	G	A	G	G	A	G	G	G	A	G	G	A	G
	G	G	G	G	G	G	G	G	G	G	G	G	G	G	G	G	G	G	G	G	G	G	G	G	A	G	G	G	G	G	G	G	G	A	A	A	G	A	G	G	A	G	G	G	A	G	G	A	G
PZE-101013713	T	T	T	T	T	T	T	T	T	T	T	T	T	T	T	T	T	T	T	T	T	T	T	T	T	T	T	T	T	T	T	T	T	T	T	T	T	T	T	T	T	T	T	C	T	T	T	T	T
	T	T	T	T	T	T	T	T	T	T	T	T	T	T	T	T	T	T	T	T	T	T	T	T	T	T	T	T	T	T	T	T	T	T	T	T	T	T	T	T	T	T	T	C	T	T	T	T	T
PZE-101013772	A	A	A	A	A	A	A	A	A	A	0	A	A	A	A	A	A	A	A	A	A	G	G	G	A	A	A	G	A	A	G	A	A	A	A	G	G	A	A	G	G	G	A	A	A	G	A	G	A
	A	A	A	A	A	A	A	A	A	A	0	A	A	A	A	A	A	A	A	A	A	G	G	G	A	A	A	G	A	A	G	A	A	A	A	G	G	A	A	G	G	G	A	A	A	G	A	G	A
PZE-101013802	T	T	C	T	C	T	T	T	T	T	T	T	T	T	T	T	T	T	T	T	C	T	T	T	C	T	T	T	T	T	T	C	T	C	T	T	T	T	T	T	C	T	T	T	C	T	T	T	T
	T	T	C	T	C	T	T	T	T	T	T	T	T	T	T	T	T	T	T	T	C	T	T	T	C	T	T	T	T	T	T	C	T	C	T	T	T	T	T	T	C	T	T	T	C	T	T	T	T
PZE-101013818	T	T	T	T	T	C	T	C	T	T	T	T	T	C	T	T	T	T	T	C	T	T	T	T	T	T	T	T	T	T	T	T	C	T	T	T	T	T	T	T	T	T	T	T	T	T	T	C	T
	T	T	T	T	T	C	T	C	T	T	T	T	T	C	T	T	T	T	T	C	T	T	T	T	T	T	T	T	T	T	T	T	C	T	T	T	T	T	T	T	T	T	T	T	T	T	T	C	T
PZE-101014003	C	C	C	C	C	C	C	G	C	C	0	G	G	G	C	C	C	C	C	C	C	G	C	C	G	C	G	C	C	C	C	C	C	C	C	C	C	C	C	C	C	C	G	C	G	C	C	C	C
	C	C	C	C	C	C	C	G	C	C	0	G	G	G	C	C	C	C	C	C	C	G	C	C	G	C	G	C	C	C	C	C	C	C	C	C	C	C	C	C	C	C	G	C	G	C	C	C	C
PZE-101014266	A	G	A	A	G	G	A	A	G	A	G	G	A	A	G	G	A	A	G	G	G	A	G	G	G	A	A	G	A	A	G	G	G	G	G	G	G	A	A	G	A	A	G	A	A	A	G	A	G
	A	G	A	A	G	G	A	A	G	A	G	G	A	A	G	G	A	A	G	G	G	A	G	G	G	A	A	G	A	A	G	G	G	G	G	G	G	A	A	G	A	A	G	A	A	A	G	A	G
PZE-101015149	A	G	A	A	G	A	A	A	A	A	A	A	A	G	A	A	A	A	A	A	A	A	A	A	A	A	A	A	A	G	G	A	A	A	A	G	A	A	A	A	A	A	A	A	A	A	A	A	A
	A	G	A	A	G	A	A	A	A	A	A	A	A	G	A	A	A	A	A	A	A	A	A	A	A	A	A	A	A	G	G	A	A	A	A	G	A	A	A	A	A	A	A	A	A	A	A	A	A
PZE-101015469	C	C	C	C	C	C	C	C	C	C	C	C	T	C	C	C	C	T	C	T	C	C	C	C	C	C	C	C	C	C	C	C	C	T	C	C	C	C	C	C	C	C	C	C	C	C	C	C	C
	C	C	C	C	C	C	C	C	C	C	C	C	T	C	C	C	C	T	C	T	C	C	C	C	C	C	C	C	C	C	C	C	C	T	C	C	C	C	C	C	C	C	C	C	C	C	C	C	C
PZE-101015471	G	G	G	G	G	A	G	G	G	A	G	G	G	G	G	A	A	A	G	A	A	A	G	G	G	A	G	A	G	G	G	G	A	A	A	G	G	G	A	A	A	G	A	G	A	A	A	A	A
	G	G	G	G	G	A	G	G	G	A	G	G	G	G	G	A	A	A	G	A	A	A	G	G	G	A	G	A	G	G	G	G	A	A	A	G	G	G	A	A	A	G	A	G	A	A	A	A	A
PZE-101015503	A	A	A	A	G	A	A	A	A	A	A	A	A	A	A	G	G	A	A	A	A	A	A	A	G	G	0	A	0	A	A	A	A	A	A	A	A	A	G	G	A	G	A	A	A	A	A	A	A
	A	A	A	A	G	A	A	A	A	A	A	A	A	A	A	G	G	A	A	A	A	A	A	A	G	G	0	A	0	A	A	A	A	A	A	A	A	A	G	G	A	G	A	A	A	A	A	A	A
PZE-101016495	T	T	T	T	T	T	T	T	T	T	0	T	T	T	T	T	T	T	T	T	C	T	T	T	T	T	T	T	C	T	T	T	T	T	T	T	T	T	T	T	T	T	T	T	T	T	T	T	T
	T	T	T	T	T	T	T	T	T	T	0	T	T	T	T	T	T	T	T	T	C	T	T	T	T	T	T	T	C	T	T	T	T	T	T	T	T	T	T	T	T	T	T	T	T	T	T	T	T
PZE-101016496	G	A	A	A	G	A	A	A	G	A	0	A	A	A	A	G	A	G	G	G	G	A	G	G	G	A	A	G	G	G	A	G	G	G	G	A	A	G	G	A	G	G	A	A	G	G	G	G	G
	G	A	A	A	G	A	A	A	G	A	0	A	A	A	A	G	A	G	G	G	G	A	G	G	G	A	A	G	G	G	A	G	G	G	G	A	A	G	G	A	G	G	A	A	G	G	G	G	G
PZE-101016971	C	C	C	A	A	C	C	C	C	C	C	C	C	A	C	C	C	C	C	A	C	C	A	A	A	C	C	C	C	A	A	C	A	C	A	A	C	A	A	C	C	C	C	C	C	A	C	C	A
	C	C	C	A	A	C	C	C	C	C	C	C	C	A	C	C	C	C	C	A	C	C	A	A	A	C	C	C	C	A	A	C	A	C	A	A	C	A	A	C	C	C	C	C	C	A	C	C	A
PZE-101016973	T	T	G	T	T	G	G	T	T	T	G	T	G	T	T	G	T	T	G	T	T	G	T	T	T	T	T	G	G	T	T	G	G	G	G	T	T	T	T	G	G	G	T	G	T	T	G	G	T
	T	T	G	T	T	G	G	T	T	T	G	T	G	T	T	G	T	T	G	T	T	G	T	T	T	T	T	G	G	T	T	G	G	G	G	T	T	T	T	G	G	G	T	G	T	T	G	G	T
PZE-101017187	G	G	G	G	G	G	A	G	G	A	G	G	G	G	G	G	G	G	G	G	A	G	A	G	G	A	G	G	G	G	G	A	A	G	A	G	G	G	G	G	G	G	G	A	G	G	G	G	G
	G	G	G	G	G	G	A	G	G	A	G	G	G	G	G	G	G	G	G	G	A	G	A	G	G	A	G	G	G	G	G	A	A	G	A	G	G	G	G	G	G	G	G	A	G	G	G	G	G
PZE-101017262	A	A	A	G	G	A	G	A	G	G	A	A	G	A	G	G	A	G	A	G	G	A	A	G	A	A	G	A	A	A	A	G	A	A	A	A	G	A	A	A	A	G	G	G	G	G	G	A	G
	A	A	A	G	G	A	G	A	G	G	A	A	G	A	G	G	A	G	A	G	G	A	A	G	A	A	G	A	A	A	A	G	A	A	A	A	G	A	A	A	A	G	G	G	G	G	G	A	G
PZE-101017380	C	C	T	C	T	T	T	C	T	C	T	T	T	T	T	C	T	T	T	T	T	T	T	T	T	T	T	T	T	T	T	T	T	T	T	T	T	T	T	C	C	T	C	T	T	T	T	C	T
	C	C	T	C	T	T	T	C	T	C	T	T	T	T	T	C	T	T	T	T	T	T	T	T	T	T	T	T	T	T	T	T	T	T	T	T	T	T	T	C	C	T	C	T	T	T	T	C	T
PZE-101017463	A	G	A	A	G	G	G	A	G	A	G	G	G	A	G	A	G	G	G	G	G	A	G	0	G	G	G	G	G	G	G	G	A	G	G	G	A	G	G	G	G	G	A	G	A	G	A	G	G
	A	G	A	A	G	G	G	A	G	A	G	G	G	A	G	A	G	G	G	G	G	A	G	0	G	G	G	G	G	G	G	G	A	G	G	G	A	G	G	G	G	G	A	G	A	G	A	G	G
PZE-101017487	G	G	G	G	G	G	G	G	G	G	G	G	G	G	G	G	G	A	G	G	G	G	G	G	G	G	G	G	A	G	G	G	G	G	G	A	G	A	G	G	G	G	G	G	G	G	G	A	G
	G	G	G	G	G	G	G	G	G	G	G	G	G	G	G	G	G	A	G	G	G	G	G	G	G	G	G	G	A	G	G	G	G	G	G	A	G	A	G	G	G	G	G	G	G	G	G	A	G
PZE-101017580	A	G	G	A	0	0	G	A	A	A	0	G	A	A	A	A	G	A	0	A	0	G	A	A	A	G	A	G	A	A	A	A	0	0	0	G	A	A	A	A	G	G	A	A	G	A	A	A	A
	A	G	G	A	0	0	G	A	A	A	0	G	A	A	A	A	G	A	0	A	0	G	A	A	A	G	A	G	A	A	A	A	0	0	0	G	A	A	A	A	G	G	A	A	G	A	A	A	A
PZE-101017581	A	A	A	A	0	0	A	A	G	A	0	A	G	A	A	A	A	A	0	A	0	A	A	A	A	A	A	A	A	A	A	A	A	0	A	A	G	A	A	A	A	A	A	G	A	A	A	A	A
	A	A	A	A	0	0	A	A	G	A	0	A	G	A	A	A	A	A	0	A	0	A	A	A	A	A	A	A	A	A	A	A	A	0	A	A	G	A	A	A	A	A	A	G	A	A	A	A	A
PZE-101017779	C	C	C	C	C	C	C	C	C	C	0	C	T	C	C	C	T	C	C	C	T	T	C	C	C	C	T	C	C	T	C	C	C	T	T	C	T	C	T	C	C	C	C	C	C	C	C	C	C
	C	C	C	C	C	C	C	C	C	C	0	C	T	C	C	C	T	C	C	C	T	T	C	C	C	C	T	C	C	T	C	C	C	T	T	C	T	C	T	C	C	C	C	C	C	C	C	C	C
PZE-101017823	A	A	A	A	G	A	G	G	A	A	A	G	A	A	A	A	A	G	A	A	A	A	G	A	A	A	A	A	A	G	G	A	G	A	A	A	G	G	A	G	A	G	A	A	A	G	A	A	A
	A	A	A	A	G	A	G	G	A	A	A	G	A	A	A	A	A	G	A	A	A	A	G	G	A	A	A	A	A	G	G	A	G	A	A	A	G	G	A	G	A	G	A	A	A	G	A	A	A
PZE-101018023	C	C	C	T	C	T	T	C	C	C	C	T	T	C	C	C	C	C	C	C	C	C	C	0	C	0	C	C	C	C	C	C	C	C	C	C	C	C	C	C	0	C	C	C	C	C	C	C	T
	C	C	C	T	C	T	T	C	C	C	C	T	T	C	C	C	C	C	C	C	C	C	C	0	C	0	C	C	C	C	C	C	C	C	C	C	C	C	C	C	0	C	C	C	C	C	C	C	T
PZE-101018057	G	G	A	G	A	A	G	G	G	G	G	G	A	G	A	G	G	G	A	G	A	G	G	G	A	G	A	A	G	G	G	G	A	A	G	A	A	G	G	A	A	A	G	G	G	G	A	G	G
	G	G	A	G	A	A	G	G	G	G	G	G	A	G	A	G	G	G	A	G	A	G	G	G	A	G	A	A	G	G	G	G	A	A	G	A	A	G	G	A	A	A	G	G	G	G	A	G	G
PZE-101018160	C	0	C	C	C	C	T	T	C	C	C	T	C	C	0	0	C	T	C	0	C	C	C	0	C	C	C	C	T	C	T	C	T	C	C	T	C	C	0	C	C	C	C	C	C	0	C	T	C
	C	0	C	C	C	C	T	T	C	C	C	T	C	C	0	0	C	T	C	0	C	C	C	0	C	C	C	C	T	C	T	C	T	C	C	T	C	C	0	C	C	C	C	C	C	0	C	T	C
PZE-101018199	C	C	C	C	A	C	A	A	C	C	C	A	A	C	C	C	C	A	C	A	A	A	A	C	C	A	C	C	C	C	A	A	C	A	C	C	C	A	C	C	C	C	C	C	C	C	A	A	A
	C	C	C	C	A	C	A	A	C	C	C	A	A	C	C	C	C	A	C	A	A	A	A	C	C	A	C	C	C	C	A	A	C	A	C	C	C	A	C	C	C	C	C	C	C	C	A	A	A
PZE-101018214	T	T	C	C	0	0	C	C	T	T	C	C	C	T	C	T	T	C	C	C	T	T	T	0	0	T	0	C	T	C	C	C	T	C	C	C	T	C	C	T	T	C	T	C	C	C	T	C	C
	T	T	C	C	0	0	C	C	T	T	C	C	C	T	C	T	T	C	C	C	T	T	T	0	0	T	0	C	T	C	C	C	T	C	C	C	T	C	C	T	T	C	T	C	C	C	T	C	C
PZE-101018261	C	C	C	C	C	C	C	C	C	C	C	C	T	C	C	C	C	C	C	C	C	C	C	C	C	C	C	C	C	C	C	C	C	C	C	T	C	C	C	T	C	C	C	C	C	C	C	C	C
	C	C	C	C	C	C	C	C	C	C	C	C	T	C	C	C	C	C	C	C	C	C	C	C	C	C	C	C	C	C	C	C	C	C	C	T	C	C	C	T	C	C	C	C	C	C	C	C	C
PZE-101018356	A	A	C	C	A	A	C	C	A	A	A	C	A	A	C	A	A	C	C	C	A	A	C	0	C	A	0	A	A	C	C	C	A	A	C	C	A	C	C	A	A	C	A	C	A	C	A	A	A
	A	A	C	C	A	A	C	C	A	A	A	C	A	A	C	A	A	C	C	C	A	A	C	0	C	A	0	A	A	C	C	C	A	A	C	C	A	C	C	A	A	C	A	C	A	C	A	A	A
PZE-101018400	C	C	A	A	C	C	A	A	0	C	A	A	C	A	A	C	C	A	A	C	C	A	A	A	C	C	A	C	A	A	C	A	C	A	C	A	C	A	C	C	C	A	C	C	A	A	C	A	A
	C	C	A	A	C	C	A	A	0	C	C	A	C	A	A	C	C	A	A	C	C	A	A	A	C	C	A	C	A	A	C	A	C	A	C	A	C	A	C	C	C	A	C	C	A	A	C	A	A
PZE-101018404	G	G	A	A	A	G	A	A	0	G	A	A	G	A	A	G	G	A	A	A	G	A	A	0	G	G	A	A	A	A	A	A	G	A	A	A	G	A	G	A	A	A	G	A	A	A	G	A	A
	G	G	A	A	A	G	A	A	0	G	A	A	G	A	A	G	G	A	A	A	G	A	A	0	G	G	A	A	A	A	A	A	G	A	A	A	G	A	G	A	A	A	G	A	A	A	G	A	A
PZE-101018411	T	T	C	C	C	C	C	C	C	T	0	C	T	C	C	T	T	C	C	C	T	T	C	0	C	T	T	C	T	C	C	C	0	C	C	C	T	C	C	C	C	C	T	C	T	C	T	C	T
	T	T	C	C	C	C	C	C	C	T	0	C	T	C	C	T	T	C	C	C	T	T	C	0	C	T	T	C	T	C	C	C	0	C	C	C	T	C	C	C	C	C	T	C	T	C	T	C	T
PZE-101018453	G	G	G	G	G	G	G	G	G	G	G	G	G	G	G	G	G	G	G	G	G	G	G	G	G	G	G	G	G	G	T	G	G	G	G	G	G	G	G	G	G	G	G	G	T	G	G	G	G
	G	G	G	G	G	G	G	G	G	G	G	G	G	G	G	G	G	G	G	G	G	G	G	G	G	G	G	G	G	G	T	G	G	G	G	G	G	G	G	G	G	G	G	G	T	G	G	G	G
PZE-101018516	T	G	G	G	G	G	G	G	T	T	G	G	T	T	G	G	T	G	G	G	G	G	T	0	G	T	G	G	G	T	G	G	G	G	G	G	T	G	G	G	G	G	T	G	G	G	T	G	G
	T	G	G	G	G	G	G	G	T	T	G	G	T	T	G	G	T	G	G	G	G	G	T	0	G	T	G	G	G	T	G	G	G	G	G	G	T	G	G	G	G	G	T	G	G	G	T	G	G
PZE-101018567	G	G	G	G	G	G	G	G	G	G	0	G	G	G	G	G	G	G	G	A	G	G	G	G	G	G	G	G	G	G	A	G	G	G	G	G	G	A	G	G	G	A	G	A	G	G	G	G	G
	G	G	G	G	G	G	G	G	G	G	0	G	G	G	G	G	G	G	G	A	G	G	G	G	G	G	G	G	G	G	A	G	G	G	G	G	G	A	G	G	G	A	G	A	G	G	G	G	G
PZE-101018616	G	G	G	G	G	T	G	T	G	T	G	G	T	G	G	G	G	T	G	T	G	G	G	G	G	T	G	G	G	G	G	T	G	G	G	G	G	G	G	G	G	T	G	G	G	G	G	G	T
	G	G	G	G	G	T	G	T	G	T	G	G	T	G	G	G	G	T	G	T	G	G	G	G	G	T	G	G	G	G	G	T	G	G	G	G	G	G	G	G	G	T	G	G	G	G	G	G	T
PZE-101018668	G	A	A	A	A	G	G	G	G	G	0	G	G	G	G	G	A	A	A	A	G	A	G	0	A	A	G	A	G	G	G	G	A	G	G	G	G	A	G	G	G	G	G	G	A	A	G	G	G
	G	A	A	A	A	G	G	G	G	G	0	G	G	G	G	G	A	A	A	A	G	A	G	0	A	A	G	A	G	G	G	G	A	G	G	G	G	A	G	G	G	G	G	G	A	A	G	G	G
PZE-101018729	G	G	G	T	G	G	G	G	G	G	G	G	G	G	G	G	T	T	G	T	G	G	G	T	T	T	G	G	G	T	T	G	G	G	G	G	G	T	G	G	G	T	G	G	G	T	T	G	G
	G	G	G	T	G	G	G	G	G	G	G	G	G	G	G	G	T	T	G	T	G	G	G	T	T	T	G	G	G	T	T	G	G	G	G	G	G	T	G	G	G	T	G	G	G	T	T	G	G
PZE-101018769	C	T	C	C	C	T	T	T	C	C	T	T	T	T	T	T	C	C	T	C	T	T	T	C	C	C	C	T	T	C	C	0	C	C	T	C	C	C	T	T	T	C	T	C	C	C	T	T	T
	C	T	C	C	C	T	T	T	C	C	T	T	T	T	T	T	C	C	T	C	T	T	T	C	C	C	C	T	T	C	C	0	C	C	T	C	C	C	T	T	T	C	T	C	C	C	T	T	T
PZE-101018818	G	G	T	G	G	T	G	G	G	T	G	G	T	G	G	G	G	G	T	G	T	G	G	G	G	G	G	T	G	G	G	G	G	G	T	T	G	G	G	T	T	G	G	G	G	G	G	T	G
	G	G	T	G	G	T	G	G	G	T	G	G	T	G	G	G	G	G	T	G	T	G	G	G	G	G	G	T	G	G	G	G	G	G	T	T	G	G	G	T	T	G	G	G	G	G	G	T	G
PZE-101018826	G	A	A	G	A	A	G	G	G	A	A	A	A	G	G	G	G	A	A	A	A	A	G	A	G	G	G	A	A	A	A	G	G	A	A	A	G	G	A	A	G	A	A	A	A	G	A	A	G
	G	A	A	G	A	A	G	G	G	A	A	A	A	G	G	G	G	A	A	A	A	A	G	G	G	G	G	A	A	A	A	G	G	A	A	A	G	G	A	A	G	A	A	A	A	G	A	A	G
PZE-101018868	A	A	A	G	G	G	A	A	A	A	0	A	G	G	A	G	A	G	A	G	A	G	A	A	A	A	A	G	A	A	A	A	A	G	A	G	A	A	A	G	G	A	A	A	A	A	G	A	A
	A	A	A	G	G	G	A	A	A	A	0	A	G	G	A	G	A	G	A	G	A	G	A	A	A	A	A	G	A	A	A	A	A	G	A	G	A	A	A	G	G	A	A	A	A	A	G	A	A
PZE-101019294	A	A	A	A	A	A	A	C	A	A	A	A	A	A	A	A	A	A	A	A	A	A	A	A	A	A	A	A	A	A	A	A	A	A	A	C	A	A	A	A	A	A	A	A	A	C	A	A	A
	A	A	A	A	A	A	A	C	A	A	A	A	A	A	A	A	A	A	A	A	A	A	A	A	A	A	A	A	A	A	A	A	A	A	A	C	A	A	A	A	A	A	A	A	A	C	A	A	A
PZE-101019334	A	A	A	A	A	A	G	G	A	A	0	A	A	A	A	A	A	A	A	A	A	G	A	A	A	G	A	A	A	G	A	G	A	G	A	G	A	A	A	G	A	A	A	G	A	A	A	A	A
	A	A	A	A	A	A	G	G	A	A	0	A	A	A	A	A	A	A	A	A	A	G	A	A	A	G	A	A	A	G	A	G	A	G	A	G	A	A	A	G	A	A	A	G	A	A	A	A	A
PZE-101019350	A	A	A	G	A	A	G	0	A	A	A	A	A	A	A	G	G	A	A	A	A	0	A	A	A	A	A	G	A	A	G	0	G	A	A	0	A	G	A	0	G	A	A	0	G	A	A	A	G
	A	A	A	G	A	A	G	0	A	A	A	A	A	A	A	G	G	A	A	A	A	0	A	A	A	A	A	G	A	A	G	0	G	A	A	0	A	G	A	0	G	A	A	0	G	A	A	A	G
PZE-101019536	G	G	A	A	A	G	0	A	0	G	0	G	A	A	A	A	A	G	G	A	G	G	A	A	A	A	G	A	G	G	A	G	G	A	A	A	A	A	A	G	A	A	G	G	A	G	G	G	G
	G	G	A	A	A	G	0	A	0	G	0	G	A	A	A	A	A	G	G	A	G	G	A	A	A	A	G	A	G	G	A	G	G	A	A	A	A	A	A	G	A	A	G	G	A	G	G	G	G
PZE-101019537	G	G	A	A	A	G	A	A	A	G	A	G	A	A	A	A	A	G	G	A	G	G	A	A	A	A	G	A	G	G	A	G	G	A	A	A	A	A	A	G	A	A	G	G	A	G	G	G	G
	G	G	A	A	A	G	A	A	A	G	A	G	A	A	A	A	A	G	G	A	G	G	A	A	A	A	G	A	G	G	A	G	G	A	A	A	A	A	A	G	A	A	G	G	A	G	G	G	G
PZE-101019538	A	A	G	G	G	A	G	G	G	A	G	A	G	G	G	G	G	A	A	G	A	A	G	G	0	0	A	G	A	A	G	A	A	G	G	0	G	G	G	A	G	G	A	A	0	A	A	A	A
	A	A	G	G	G	A	G	G	G	A	G	A	G	G	G	G	G	A	A	G	A	A	G	G	0	0	A	G	A	A	G	A	A	G	G	0	G	G	G	A	G	G	A	A	0	A	A	A	A
PZE-101019557	T	T	C	C	C	T	T	T	C	T	C	T	C	C	T	C	C	T	T	C	C	C	C	C	C	C	C	C	C	T	C	T	C	C	C	C	C	T	C	T	C	C	C	T	C	C	C	C	T
	T	T	C	C	C	T	T	T	C	T	C	T	C	C	T	C	C	T	T	C	C	C	C	C	C	C	C	C	C	T	C	T	C	C	C	C	C	T	C	T	C	C	C	T	C	C	C	C	T
PZE-101019597	C	T	T	T	T	T	T	T	T	C	T	C	C	T	T	T	T	T	T	C	T	T	T	C	T	T	T	C	C	T	T	C	T	T	C	T	T	T	T	T	T	T	T	T	T	T	T	C	T
	C	T	T	T	T	T	T	T	T	C	T	C	C	T	T	T	T	T	T	C	T	T	T	C	T	T	T	C	C	T	T	C	T	T	C	T	T	T	T	T	T	T	T	T	T	T	T	C	T
PZE-101019726	C	T	C	T	C	C	C	C	T	C	C	C	C	C	C	C	T	C	C	C	C	T	C	C	C	C	T	C	T	C	C	T	T	C	C	C	T	C	C	T	C	C	T	0	T	T	C	C	C
	C	T	C	T	C	C	C	C	T	C	C	C	C	C	C	C	T	C	C	C	C	T	C	C	C	C	T	C	T	C	C	T	T	C	C	C	T	C	C	T	C	C	T	0	T	T	C	C	C
PZE-101019727	A	A	G	A	G	G	G	G	A	A	A	A	A	A	A	G	A	G	A	G	G	A	G	G	A	G	A	A	A	G	G	A	G	A	G	G	G	G	A	A	G	A	A	0	G	A	G	A	A
	A	A	G	A	G	G	G	G	A	A	A	A	A	A	A	G	A	G	A	G	G	A	G	G	A	G	A	A	A	G	G	A	G	A	G	G	G	G	A	A	G	A	A	0	G	A	G	A	A
PZE-101019728	C	C	C	C	C	C	A	C	C	C	C	C	C	C	C	C	C	C	C	C	C	C	C	C	C	C	C	C	C	C	C	C	A	C	C	C	A	C	C	C	C	C	C	C	A	C	C	C	C
	C	C	C	C	C	C	A	C	C	C	C	C	C	C	C	C	C	C	C	C	C	C	C	C	C	C	C	C	C	C	C	C	A	C	C	C	A	C	C	C	C	C	C	C	A	C	C	C	C
PZE-101019767	G	G	A	G	A	A	G	G	G	G	0	A	A	G	A	A	G	G	A	A	A	G	A	A	A	A	G	A	G	A	A	G	A	A	A	A	G	A	A	G	A	A	G	0	A	G	G	A	G
	G	G	A	G	A	A	G	G	G	G	0	A	A	G	A	A	G	G	A	A	A	G	A	A	A	A	G	A	G	A	A	G	A	A	A	A	G	A	A	G	A	A	G	0	A	G	G	A	G
PZE-101019781	T	C	T	C	T	T	C	T	C	T	0	T	T	T	T	T	C	C	T	T	T	C	T	T	T	T	T	T	C	T	T	T	T	T	T	T	C	T	T	C	T	T	T	0	T	T	T	T	T
	T	C	T	C	T	T	C	T	C	T	0	T	T	T	T	T	C	C	T	T	T	C	T	T	T	T	T	T	C	T	T	T	T	T	T	T	C	T	T	C	T	T	T	0	T	T	T	T	T
PZE-101019823	C	0	C	0	C	C	0	C	T	C	C	C	C	C	C	C	T	T	C	C	C	T	C	C	C	C	C	C	T	C	C	C	C	C	C	C	T	C	C	T	C	C	C	0	C	C	C	C	C
	C	0	C	0	C	C	0	C	C	C	C	C	C	C	C	C	T	T	C	C	C	T	C	C	C	C	C	C	T	C	C	C	C	C	C	C	C	C	C	T	C	C	C	0	C	C	C	C	C
PZE-101019853	A	G	A	G	A	A	G	A	G	A	0	A	A	A	A	A	G	G	A	A	A	G	A	A	A	A	A	A	G	A	A	A	A	A	G	A	G	A	A	G	A	A	A	G	A	A	A	A	A
	A	G	A	G	A	A	G	A	G	A	0	A	A	A	A	A	G	G	A	A	A	G	A	A	A	A	A	A	G	A	A	A	A	A	G	A	G	A	A	G	A	A	A	G	A	A	A	A	A
PZE-101020116	A	C	C	C	C	C	C	A	C	C	0	C	C	A	C	A	C	C	C	A	C	A	C	C	A	C	C	C	A	C	C	C	C	A	A	A	A	A	C	C	C	C	C	A	0	C	A	C	A
	A	C	C	C	C	C	C	A	C	C	0	C	C	A	C	C	C	C	C	A	C	C	C	C	A	C	C	C	C	C	C	C	C	A	A	A	C	A	C	C	C	C	C	C	0	C	A	C	A
PZE-101020456	C	C	T	C	T	C	C	C	C	C	0	C	T	C	C	T	C	C	T	T	C	C	C	C	C	C	C	C	C	C	C	T	T	C	T	T	C	T	C	C	C	C	T	0	T	C	C	C	C
	C	C	T	C	T	C	C	C	C	C	0	C	T	C	C	T	C	C	T	T	C	C	C	C	C	C	C	C	C	C	C	T	T	C	T	T	C	T	C	C	C	C	T	0	T	C	C	C	C
PZE-101020844	T	T	C	C	T	T	T	0	0	T	0	T	T	C	T	T	C	C	T	C	C	T	C	T	C	C	C	C	C	C	T	T	C	C	C	C	C	T	T	T	T	C	T	T	C	C	C	T	T
	T	T	C	C	T	T	T	0	0	T	0	T	T	C	T	T	C	C	T	C	C	T	C	T	C	C	C	C	C	C	T	T	C	C	C	C	C	T	T	T	T	C	T	T	C	C	C	T	T
PZE-101020931	G	G	G	A	G	G	A	G	G	A	0	G	G	G	G	G	A	A	G	G	G	A	G	G	G	G	G	A	A	G	G	G	G	G	G	G	A	G	G	G	G	G	G	G	G	G	A	G	G
	G	G	G	A	G	G	A	G	G	A	0	G	G	G	G	G	A	A	G	G	G	A	G	G	G	G	G	A	A	G	G	G	G	G	G	G	A	G	G	G	G	G	G	G	G	G	A	G	G
PZE-101020971	T	C	T	T	C	T	T	T	C	T	0	T	T	T	C	C	T	T	T	T	T	C	T	T	C	T	T	C	C	C	C	T	T	C	C	T	C	T	T	C	T	T	C	T	T	T	C	T	C
	T	C	T	T	C	T	T	T	C	T	0	T	T	T	C	C	T	T	T	T	T	C	T	T	C	T	T	C	C	C	C	T	T	C	C	T	C	T	T	C	T	T	C	T	T	T	C	T	C
PZE-101021308	C	C	C	C	C	C	C	C	C	G	C	C	C	C	G	C	C	C	C	C	C	C	C	C	C	G	C	C	C	C	C	C	G	C	G	C	G	C	C	G	G	G	G	0	C	C	C	G	C
	C	C	C	C	C	C	C	C	C	G	C	C	C	C	G	C	C	C	C	C	C	C	C	C	C	G	C	C	C	C	C	C	G	C	G	C	G	C	C	G	G	G	G	0	C	C	C	G	C
PZE-101021455	T	C	C	T	T	T	C	C	C	C	0	T	C	T	T	C	C	C	T	C	T	T	C	C	C	T	C	T	C	C	C	C	T	T	C	C	C	C	C	C	T	T	T	C	C	C	T	C	C
	T	C	C	T	T	T	C	C	C	C	0	T	C	T	T	C	C	C	T	C	T	T	C	C	C	T	C	T	C	C	C	C	T	T	C	C	C	C	C	C	T	T	T	C	C	C	T	C	C
PZE-101021479	G	G	G	G	G	G	G	G	G	A	0	G	G	A	G	G	G	G	A	A	G	A	G	G	0	G	G	G	G	A	G	G	G	G	G	G	G	G	G	G	A	A	A	G	G	G	G	G	G
	G	G	G	G	G	G	G	G	G	A	0	G	G	A	G	G	G	G	A	A	G	A	G	G	0	G	G	G	G	A	G	G	G	G	G	G	G	G	G	G	A	A	A	G	G	G	G	G	G
PZE-101021574	T	G	T	T	G	T	T	G	T	G	T	T	T	T	T	T	G	T	T	T	0	0	T	T	T	T	T	T	T	T	T	T	T	T	0	T	G	T	T	T	T	T	T	T	T	T	0	T	0
	T	G	T	T	G	T	T	G	T	G	T	T	T	T	T	T	G	T	T	T	0	0	T	T	T	T	T	T	T	T	T	T	T	T	0	T	G	T	T	T	T	T	T	T	T	T	0	T	0
PZE-101021585	A	0	A	A	0	A	A	0	A	0	A	A	A	A	A	A	0	A	A	A	A	A	A	A	A	A	A	C	A	A	C	A	0	A	A	A	0	A	A	C	C	A	A	C	C	A	C	C	A
	A	0	A	A	0	A	A	0	A	0	A	A	A	A	A	A	0	A	A	A	A	A	A	A	A	A	A	C	A	A	C	A	0	A	A	A	0	A	A	C	C	A	A	C	C	A	C	C	A
PZE-101021690	G	A	G	G	G	G	A	G	0	G	G	G	G	A	G	G	G	G	G	G	G	G	G	G	G	G	G	G	G	G	G	G	G	A	G	G	G	G	G	G	G	G	G	G	G	G	G	G	G
	G	A	G	G	G	G	A	G	0	G	G	G	G	A	G	G	G	G	G	G	G	G	G	G	G	G	G	G	G	G	G	G	G	A	G	G	G	G	G	G	G	G	G	G	G	G	G	G	G
PZE-101021745	C	C	C	C	C	C	C	C	C	A	C	C	C	C	C	C	A	C	C	A	C	C	C	C	C	C	0	C	C	C	C	C	C	C	C	C	C	C	C	C	C	C	C	C	C	C	C	C	C
	C	C	C	C	C	C	C	C	C	A	C	C	C	C	C	C	A	C	C	A	C	C	C	C	C	C	0	C	C	C	C	C	C	C	C	C	C	C	C	C	C	C	C	C	C	C	C	C	C
PZE-101021926	A	C	C	A	A	C	A	C	A	C	0	C	C	C	C	C	C	A	C	A	C	C	C	A	C	C	C	A	C	C	C	C	A	A	A	A	C	C	A	A	C	C	C	0	C	C	C	C	A
	A	C	C	A	A	C	A	C	A	C	0	C	C	C	C	C	C	A	C	A	C	C	C	A	C	C	C	A	C	C	C	C	A	A	A	A	C	C	A	A	C	C	C	0	C	C	C	C	A
PZE-101021930	G	G	A	G	A	A	G	G	0	G	G	G	G	G	G	G	G	G	A	G	G	G	G	G	A	A	G	G	A	G	A	G	G	G	G	G	A	A	G	A	G	G	G	A	G	G	G	G	G
	G	G	A	G	A	A	G	G	0	G	G	G	G	G	G	G	G	G	A	G	G	G	G	G	A	A	G	G	A	G	A	G	G	G	G	G	A	A	G	A	G	G	G	A	G	G	G	G	G
PZE-101021985	G	A	G	G	G	G	G	G	A	A	G	G	A	G	G	G	G	G	A	G	G	G	G	G	G	G	G	G	G	G	G	G	G	G	G	G	G	G	G	G	G	G	A	G	G	A	G	G	G
	G	A	G	G	G	G	G	G	A	A	G	G	A	G	G	G	G	G	A	G	G	G	G	G	G	G	G	G	G	G	G	G	G	G	G	G	G	G	G	G	G	G	A	G	G	A	G	G	G
PZE-101021986	C	T	C	C	T	C	C	C	T	T	C	C	T	C	C	T	C	C	T	C	T	C	C	C	T	C	C	C	C	C	C	C	C	C	C	C	T	C	C	C	C	C	T	C	C	T	T	C	C
	C	T	C	C	T	C	C	C	T	T	C	C	T	C	C	T	C	C	T	C	T	C	C	C	T	C	C	C	C	C	C	C	C	C	C	C	T	C	C	C	C	C	T	C	C	T	T	C	C
PZE-101021997	C	T	C	C	C	C	C	C	0	T	C	C	C	C	C	C	C	C	T	C	C	C	C	C	C	C	C	C	C	C	C	C	C	C	C	C	C	C	C	C	C	C	T	C	T	T	C	T	C
	C	T	C	C	C	C	C	C	0	T	C	C	C	C	C	C	C	C	T	C	C	C	C	C	C	C	C	C	C	C	C	C	C	C	C	C	C	C	C	C	C	C	T	C	T	T	C	T	C
PZE-101022341	C	C	C	C	C	C	C	C	C	C	C	T	C	T	C	T	C	C	C	C	C	T	C	C	C	C	C	C	T	C	C	C	C	C	C	C	C	C	C	C	C	C	C	C	T	C	C	T	C
	C	C	C	C	C	C	C	C	C	C	C	T	C	T	C	T	C	C	C	C	C	T	C	C	C	C	C	C	T	C	C	C	C	C	C	C	C	C	C	C	C	C	C	C	T	C	C	T	C
PZE-101022796	T	T	T	T	C	T	T	T	T	T	T	T	T	T	T	T	T	C	T	C	T	C	T	T	T	T	T	C	C	T	C	T	T	T	T	T	T	T	C	T	T	T	T	C	T	T	T	T	0
	T	T	T	T	C	T	T	T	T	T	C	T	T	T	T	T	T	C	T	C	T	C	T	T	T	T	T	C	C	T	C	T	T	T	T	T	T	T	C	T	T	T	T	C	T	T	T	T	0
PZE-101023271	G	G	G	G	T	G	G	G	G	T	G	G	G	T	G	T	G	G	G	G	G	G	G	G	G	G	G	G	G	T	G	G	G	G	T	G	T	G	G	G	G	G	G	G	G	G	G	G	T
	G	G	G	G	T	G	G	G	G	T	G	G	G	T	G	T	G	G	G	G	G	G	G	G	G	G	G	G	G	T	G	G	G	G	T	G	T	G	G	G	G	G	G	G	G	G	G	G	G
PZE-101023625	A	A	A	G	A	A	G	G	A	G	A	A	A	A	G	G	0	A	A	A	A	A	G	A	A	G	A	G	G	A	A	A	G	0	G	A	A	A	G	0	A	A	A	A	G	A	A	G	G
	A	A	A	G	A	A	G	G	A	G	A	A	A	A	G	G	0	A	A	A	A	A	G	A	A	G	A	G	G	A	A	A	G	0	G	A	A	A	G	0	A	A	A	A	G	A	A	G	G
PZE-101023852	A	A	G	A	A	G	G	G	A	A	0	G	A	A	A	G	G	G	A	G	A	G	G	G	G	G	A	G	G	0	G	G	G	A	G	A	A	G	G	G	G	A	A	G	A	0	G	A	G
	A	A	G	A	A	G	G	G	A	A	0	G	A	A	A	G	G	G	A	G	A	G	G	G	G	G	A	G	G	0	G	G	G	A	G	A	A	G	G	G	G	A	A	G	A	0	G	A	G
PZE-101024131	C	T	T	T	T	T	T	T	T	T	0	T	C	T	T	T	T	T	T	T	T	T	T	T	T	T	T	T	T	T	T	T	T	T	T	T	T	T	T	T	T	T	C	T	C	T	T	T	T
	C	T	T	T	T	T	T	T	T	T	0	T	C	T	T	T	T	T	T	T	T	T	T	T	T	T	T	T	T	T	T	T	T	T	T	T	T	T	T	T	T	T	C	T	C	T	T	T	T
PZE-101024353	0	0	T	C	T	0	T	T	0	T	T	T	T	T	T	T	T	T	T	T	T	T	T	T	T	T	T	T	C	0	T	T	T	T	T	T	T	T	T	T	T	T	T	0	0	T	0	T	T
	0	0	T	C	T	0	T	T	0	T	T	T	T	T	T	T	T	T	T	T	T	T	T	T	T	T	T	T	C	0	T	T	T	T	T	T	T	T	T	T	T	T	T	0	0	T	0	T	T
PZE-101024424	T	T	T	T	T	T	T	T	T	T	T	T	C	T	T	C	T	T	T	C	C	T	C	C	T	T	T	C	T	T	T	C	T	T	T	T	T	C	T	T	T	T	T	T	T	T	T	T	0
	T	T	T	T	T	T	T	T	T	T	T	T	C	T	T	C	T	T	T	C	C	T	C	C	T	T	T	C	T	T	T	C	T	T	T	T	T	C	T	T	T	T	T	T	T	T	T	T	0
PZE-101024452	G	G	G	G	G	G	G	G	G	A	G	A	G	A	A	A	A	G	G	A	G	G	A	A	G	A	A	A	G	A	G	G	G	A	G	A	G	A	A	G	G	G	G	A	G	G	G	G	0
	G	G	G	G	G	G	G	G	G	A	G	A	G	A	A	A	A	G	G	A	G	G	A	A	G	A	A	A	G	A	G	G	G	A	G	A	G	A	A	G	G	G	G	A	G	G	G	G	0
PZE-101024519	T	C	T	T	C	C	T	T	C	C	0	C	T	C	C	C	C	T	T	C	T	T	C	C	T	C	T	C	C	C	T	C	C	T	T	T	C	C	T	T	C	T	T	C	C	T	C	T	T
	T	C	T	T	C	C	T	T	C	C	0	C	T	C	C	C	C	T	T	C	T	T	C	C	T	C	T	C	C	C	T	C	C	T	T	T	C	C	T	T	C	T	T	C	C	T	C	T	T
PZE-101024556	A	G	G	G	G	G	G	G	A	A	G	G	A	A	G	G	0	G	G	G	A	G	G	G	G	A	G	G	G	A	G	G	G	G	G	G	G	G	G	G	0	G	0	A	G	G	0	G	0
	A	G	G	G	G	G	G	G	G	A	G	G	A	A	G	G	0	G	G	G	A	G	G	G	G	A	G	G	G	A	G	G	G	G	G	G	G	G	G	G	0	G	0	A	G	G	0	G	0
PZE-101024667	C	C	C	C	C	C	C	C	C	C	C	C	C	C	C	T	C	C	T	T	C	C	T	T	C	C	C	T	C	C	C	C	T	C	C	T	C	T	T	C	C	C	C	C	C	C	C	C	C
	C	C	C	C	C	C	C	C	C	C	C	C	C	C	C	T	C	C	T	T	C	C	T	T	C	C	C	T	C	C	C	C	T	C	C	T	C	T	T	C	C	C	C	C	C	C	C	C	C
PZE-101024700	A	A	A	G	G	A	A	G	G	A	0	A	A	A	A	A	A	A	A	A	G	A	A	A	A	G	A	A	G	A	A	A	A	A	G	A	A	A	A	A	A	A	A	A	A	A	A	A	A
	A	A	A	G	G	A	A	G	G	A	0	A	A	A	A	A	A	A	A	A	G	A	A	A	A	G	A	A	G	A	A	A	A	A	G	A	A	A	A	A	A	A	A	A	A	A	A	A	A
PZE-101024733	C	T	0	C	C	T	T	C	C	C	0	T	T	C	T	T	T	T	T	T	C	T	T	T	T	C	T	0	C	T	T	T	T	T	C	0	C	T	T	T	T	T	C	T	T	T	T	0	T
	C	T	0	C	C	T	T	C	C	C	0	T	T	C	T	T	T	T	T	T	C	T	T	T	T	C	T	0	C	T	T	T	T	T	C	0	C	T	T	T	T	T	C	T	T	T	T	0	T
PZE-101024779	G	G	A	G	G	G	G	G	G	A	G	G	G	A	G	G	G	G	G	G	G	G	G	G	G	G	G	G	G	G	A	G	G	G	G	G	G	G	G	G	G	A	G	A	G	G	G	G	G
	G	G	A	G	G	G	G	G	G	A	G	G	G	A	G	G	G	G	G	G	G	G	G	G	G	G	G	G	G	G	A	G	G	G	G	G	G	G	G	G	G	A	G	A	G	G	G	G	G
PZE-101024808	C	C	A	A	A	A	A	A	A	A	C	C	C	A	C	C	C	C	A	C	A	A	C	A	C	C	C	C	A	A	A	C	C	C	A	A	C	A	C	A	A	A	C	A	A	A	C	C	0
	C	C	A	A	A	A	A	A	A	A	C	C	C	A	C	C	C	C	A	C	A	A	C	A	C	C	C	C	A	A	A	C	C	C	A	A	C	A	C	A	A	A	C	A	A	A	C	C	0
PZE-101024809	A	A	C	C	C	C	C	C	C	C	0	A	A	C	A	C	A	A	C	C	C	C	C	C	A	A	A	C	C	C	C	A	A	A	C	C	A	C	A	C	C	C	A	C	C	C	A	C	0
	A	A	C	C	C	C	C	C	C	C	0	A	A	C	A	C	A	A	C	C	C	C	C	C	A	A	A	C	C	C	C	A	A	A	C	C	A	C	A	C	C	C	A	C	C	C	A	C	0
PZE-101025101	A	C	A	A	A	C	A	A	A	C	0	A	A	C	A	A	A	A	A	A	A	C	C	C	C	A	A	A	A	0	A	A	C	C	A	A	A	C	C	C	C	C	A	A	C	A	C	0	A
	A	C	A	A	A	C	A	A	A	C	0	A	A	C	A	A	A	A	A	A	A	C	C	C	C	A	A	A	A	0	A	A	C	C	A	A	A	C	C	C	C	C	A	A	C	A	C	0	A
PZE-101025939	G	G	0	G	G	G	G	G	G	G	G	G	G	G	G	G	G	G	0	G	G	G	0	G	G	G	G	G	G	0	G	G	G	G	G	G	G	G	G	A	G	G	G	G	G	G	G	G	G
	G	G	0	G	G	G	G	G	G	G	G	G	G	G	G	G	G	G	0	G	G	G	0	G	G	G	G	G	G	0	G	G	G	G	G	G	G	G	G	A	G	G	G	G	G	G	G	G	G
PZE-101026095	T	C	T	T	C	T	C	T	T	T	T	T	T	C	T	T	T	T	T	T	T	T	T	T	T	T	C	T	T	T	T	T	T	T	T	C	C	T	T	T	T	T	T	C	C	T	T	T	T
	T	C	T	T	C	T	C	T	T	T	T	T	T	C	T	T	T	T	T	T	T	T	T	T	T	T	C	T	T	T	T	T	T	T	T	C	C	T	T	T	T	T	T	C	C	T	T	T	T
PZE-101026096	T	C	T	T	C	T	C	T	T	T	T	T	T	C	T	T	T	T	T	T	T	T	T	T	T	T	C	T	T	T	T	T	T	T	T	C	C	T	T	T	T	T	T	C	C	T	T	T	T
	T	C	T	T	C	T	C	T	T	T	T	T	T	C	T	T	T	T	T	T	T	T	T	T	T	T	C	T	T	T	T	T	T	T	T	C	C	T	T	T	T	T	T	C	C	T	T	T	T
PZE-101026148	T	T	T	T	C	T	T	T	T	T	T	T	T	T	T	T	T	T	T	C	T	T	C	T	C	T	C	T	C	T	C	C	C	C	T	T	T	T	T	C	C	T	T	C	T	T	T	T	0
	T	T	T	T	C	T	T	T	T	T	T	T	T	T	T	T	T	T	T	C	T	T	C	T	C	T	C	T	C	T	C	C	C	C	T	T	T	T	T	C	C	T	T	C	T	T	T	T	0
PZE-101026206	G	G	G	A	A	A	G	G	G	G	0	G	G	G	G	G	G	G	A	G	G	A	G	G	G	G	G	G	G	G	G	G	G	A	G	G	G	G	G	G	G	G	G	A	G	G	G	G	G
	G	G	G	A	A	A	G	G	G	G	0	G	G	G	G	G	G	G	A	G	G	A	G	G	G	G	G	G	G	G	G	G	G	A	G	G	G	G	G	G	G	G	G	A	G	G	G	G	G
PZE-101026218	A	A	A	G	G	G	A	A	A	A	0	A	A	A	A	A	A	A	G	A	A	G	A	A	A	A	A	A	A	A	A	A	A	G	A	A	A	A	A	A	A	A	A	G	A	A	A	A	A
	A	A	A	G	G	G	A	A	A	A	0	A	A	A	A	A	A	A	G	A	A	G	A	A	A	A	A	A	A	A	A	A	A	G	A	A	A	A	A	A	A	A	A	G	A	A	A	A	A
PZE-101026314	A	G	A	G	A	A	G	A	G	G	0	A	G	A	G	A	A	A	A	A	A	A	A	A	G	A	G	G	A	G	A	G	A	A	G	A	A	A	A	A	A	G	G	A	A	G	G	A	0
	A	G	A	G	A	A	G	A	G	G	0	A	G	A	G	A	A	A	A	A	A	A	A	A	G	A	G	G	A	G	A	G	A	A	G	A	A	A	A	A	A	G	G	A	A	G	G	A	0
PZE-101026386	0	C	T	0	C	C	T	0	T	0	C	0	T	0	0	C	C	C	C	C	C	C	C	C	C	C	T	0	C	0	C	C	C	C	0	C	0	C	C	0	C	C	T	C	C	C	T	C	C
	0	C	T	0	C	C	T	0	T	0	C	0	T	0	0	C	C	C	C	C	C	C	C	C	C	C	T	0	C	0	C	C	C	C	0	C	0	C	C	0	C	C	T	C	C	C	T	C	C
PZE-101026429	T	C	C	T	T	T	C	T	C	T	T	T	T	T	T	T	C	T	T	C	T	T	T	C	T	T	T	T	T	T	T	T	T	T	T	T	T	T	T	T	T	T	C	T	T	T	T	T	T
	T	C	C	T	T	T	C	T	C	T	T	T	T	T	T	T	C	T	T	C	T	T	T	C	T	T	T	T	T	T	T	T	T	T	T	T	T	T	T	T	T	T	C	T	T	T	T	T	T
PZE-101026621	C	C	A	A	A	C	A	A	A	C	C	A	A	0	C	A	C	A	A	A	A	C	A	C	A	A	A	0	C	C	C	C	A	C	A	C	A	C	A	C	A	A	A	A	A	A	A	A	A
	C	C	A	A	A	C	A	A	A	C	C	A	A	0	C	A	C	A	A	A	A	C	A	C	A	A	A	0	C	C	C	C	A	C	C	C	C	C	A	C	A	C	A	A	A	A	A	A	C
PZE-101027125	C	C	C	C	G	G	C	G	C	C	C	G	G	C	G	G	G	G	G	G	G	C	G	G	G	G	C	C	G	G	G	C	G	G	C	G	G	G	G	G	C	G	C	G	G	C	G	G	0
	C	C	C	C	G	G	C	G	C	C	C	G	G	C	G	G	G	G	G	G	G	C	G	G	G	G	C	C	G	G	G	C	G	G	C	G	G	G	G	G	C	G	C	G	G	C	G	G	0
PZE-101027158	A	A	A	G	G	G	A	G	A	A	A	G	G	A	G	G	G	G	G	G	G	A	G	G	G	G	0	G	G	G	G	A	G	G	G	G	G	G	G	G	G	G	A	G	G	G	G	G	G
	A	A	A	G	G	G	A	G	A	A	A	G	G	A	G	G	G	G	G	G	G	A	G	G	G	G	0	G	G	G	G	A	G	G	G	G	G	G	G	G	G	G	A	G	G	G	G	G	G
PZE-101027351	G	G	A	G	G	A	G	G	G	G	A	A	G	G	A	A	A	A	A	A	G	G	G	G	A	A	A	A	A	G	G	A	A	A	G	G	G	G	G	G	A	A	G	G	A	A	G	G	0
	G	G	A	G	G	A	G	G	G	G	A	A	G	G	A	A	A	A	A	A	G	G	G	G	A	A	A	A	A	G	G	A	A	A	G	G	G	G	G	G	A	A	G	G	A	A	G	G	0
PZE-101027362	G	A	G	G	A	G	A	A	G	A	G	G	A	A	G	G	G	G	G	G	A	A	A	A	G	G	G	G	G	A	A	G	G	A	G	A	G	A	A	A	G	G	A	A	G	G	A	A	0
	G	A	G	G	A	G	A	A	G	A	G	G	A	A	G	G	G	G	G	G	A	A	A	A	G	G	G	G	G	A	A	G	G	A	G	A	G	A	A	A	G	G	A	A	G	G	A	A	0
PZE-101027182	G	G	G	G	0	T	G	T	G	G	0	T	T	G	G	T	G	G	G	0	T	T	G	T	0	0	G	T	T	T	G	T	G	T	G	0	G	G	G	G	T	G	G	T	G	G	G	T	G
	G	G	G	G	0	T	G	T	G	G	0	T	T	G	G	T	G	G	G	0	T	T	G	T	0	0	G	T	T	T	G	T	G	T	G	0	G	G	G	G	T	G	G	T	G	G	G	T	G
PZE-101027475	T	T	C	T	C	T	T	T	T	T	T	T	C	T	T	C	T	C	T	C	T	T	C	T	T	C	0	C	T	C	T	T	T	T	T	C	C	T	T	C	C	T	T	C	C	C	T	C	C
	T	T	C	T	C	T	T	T	T	T	T	T	C	T	T	C	T	C	T	C	T	T	C	T	T	C	0	C	T	C	T	T	T	T	T	C	C	T	T	C	C	T	T	C	C	C	T	C	C
PZE-101027616	C	C	C	C	C	C	C	C	C	C	C	C	C	C	C	C	C	C	C	C	C	C	T	C	C	C	C	C	C	C	C	C	T	C	C	T	C	C	C	C	T	C	C	C	C	T	C	C	0
	C	C	C	C	C	C	C	C	C	C	C	C	C	C	C	C	C	C	C	C	C	C	T	C	C	C	C	C	C	C	C	C	T	C	C	T	C	C	C	C	T	C	C	C	C	T	C	C	0
PZE-101027798	A	A	G	G	A	G	G	G	G	G	0	A	G	A	G	G	G	G	G	G	G	A	G	G	G	G	G	G	A	G	A	G	G	G	G	G	G	G	A	G	G	G	G	G	G	G	G	G	G
	A	A	G	G	A	G	G	G	G	G	0	A	G	A	G	G	G	G	G	G	G	A	G	G	G	G	G	G	A	G	A	G	G	G	G	G	G	G	A	G	G	G	G	G	G	G	G	G	G
PZE-101027807	G	G	G	T	G	T	G	G	G	G	0	G	T	G	G	G	G	G	T	G	G	G	G	0	G	G	T	G	G	G	G	G	T	G	G	G	G	G	G	G	G	G	G	T	G	G	G	G	T
	G	G	G	T	G	T	G	G	G	G	0	G	T	G	G	G	G	G	T	G	G	G	G	0	G	G	T	G	G	G	G	G	T	G	G	G	G	G	G	G	G	G	G	T	G	G	G	G	G
PZE-101027831	G	A	G	A	A	G	G	G	G	G	G	A	G	G	G	A	A	A	G	A	G	A	A	A	A	A	G	G	A	A	G	A	G	A	A	A	G	G	A	A	G	G	G	G	G	G	A	A	G
	G	A	G	A	A	G	G	G	G	G	G	A	G	G	G	A	A	A	G	A	G	A	A	A	A	A	G	G	A	A	G	A	G	A	A	A	G	G	A	A	G	G	G	G	G	G	A	A	G
PZE-101028104	A	A	G	G	G	G	G	A	G	G	0	A	G	A	G	G	G	G	G	G	G	G	G	A	G	G	G	0	G	G	A	A	A	A	G	A	G	G	A	A	0	G	G	A	G	A	A	G	0
	A	A	G	G	G	G	G	A	G	G	0	A	G	A	G	G	G	G	G	G	G	G	G	G	G	G	G	0	G	G	A	A	A	A	G	A	G	G	A	A	0	G	G	A	G	A	A	G	0
PZE-101028121	G	G	G	G	G	G	A	G	G	G	G	G	A	G	G	G	A	G	G	A	A	G	A	A	A	G	A	G	A	A	A	A	G	G	A	G	G	A	G	G	G	G	G	A	A	G	G	A	G
	G	G	G	G	G	G	A	G	G	G	G	G	A	G	G	G	A	G	G	A	A	G	A	G	A	G	A	G	A	A	A	A	G	G	A	G	G	A	G	G	G	G	G	A	A	G	G	A	G
PZE-101028242	A	A	A	A	G	A	A	A	A	G	0	A	G	A	G	A	A	A	G	A	A	A	A	A	G	A	A	A	A	A	A	G	A	G	A	A	G	A	A	A	A	A	G	A	G	A	G	G	A
	A	A	A	A	G	A	A	A	A	G	0	A	G	A	G	A	A	A	G	A	A	A	A	A	G	A	A	A	A	A	A	G	A	G	A	A	G	A	A	A	A	A	G	A	G	A	G	G	G
PZE-101028839	C	C	C	A	C	C	C	A	C	C	C	C	C	C	C	A	C	A	C	C	C	C	C	A	C	C	C	C	C	C	C	C	A	C	C	A	C	C	C	C	C	C	C	C	C	C	A	C	C
	C	C	C	A	C	C	C	A	C	C	C	C	C	C	C	A	C	A	C	C	C	C	C	A	C	C	C	C	C	C	C	C	A	C	C	A	C	C	C	C	C	C	C	C	C	C	A	C	C
PZE-101028930	G	G	A	0	G	A	G	G	G	A	0	A	A	G	G	0	A	G	A	G	A	A	G	G	0	G	A	G	G	A	A	G	G	G	G	G	G	G	G	G	G	G	G	G	G	G	G	G	0
	G	G	A	0	G	A	G	G	G	A	0	A	A	G	G	0	A	G	A	G	A	A	G	G	0	G	A	G	G	A	A	G	G	G	G	G	G	G	G	G	G	G	G	G	G	G	G	G	0
PZE-101029123	G	G	G	G	G	G	T	T	G	G	T	G	G	G	G	G	T	G	G	G	T	T	G	0	G	T	G	G	G	G	T	T	G	T	T	T	G	G	T	G	G	T	G	T	G	G	T	T	T
	G	G	G	G	G	G	T	T	G	G	T	G	G	G	G	G	T	G	G	G	T	T	G	0	G	T	G	G	G	G	T	T	G	T	G	T	G	G	T	G	G	T	G	T	G	G	T	T	G
PZE-101029587	G	G	G	G	A	A	G	G	G	G	A	G	A	G	G	G	G	G	G	G	A	A	G	0	G	G	A	G	G	G	G	G	G	G	G	G	G	G	G	G	G	G	G	G	G	G	G	G	G
	G	G	G	G	A	A	G	G	G	G	A	G	A	G	G	G	G	G	G	G	A	A	G	0	G	G	A	G	G	G	G	G	G	G	G	G	G	G	G	G	G	G	G	G	G	G	G	G	G
PZE-101029648	A	A	A	A	G	A	A	G	A	A	0	A	A	A	A	A	A	A	A	G	A	A	A	A	G	A	A	G	G	A	A	A	A	G	A	A	A	A	A	A	A	G	A	A	A	A	A	A	A
	A	A	A	A	G	A	A	G	A	A	0	A	A	A	A	A	A	A	A	G	A	A	A	A	G	A	A	G	G	A	A	A	A	G	A	A	A	A	A	A	A	G	A	A	A	A	A	A	A
PZE-101029689	G	G	A	A	A	A	A	A	A	G	A	A	G	A	G	A	A	G	A	A	A	A	G	A	A	A	A	A	A	G	A	A	A	G	A	G	A	A	G	A	A	A	A	A	G	A	G	A	A
	G	G	A	A	A	A	A	A	A	G	A	A	G	A	G	A	A	G	A	A	A	A	G	A	A	A	A	A	A	G	A	A	A	G	A	G	A	A	G	A	A	A	A	A	G	A	G	A	G
PZE-101029707	A	G	G	A	A	A	A	A	A	G	A	A	G	A	G	A	G	G	A	A	0	A	G	G	A	A	0	A	A	G	A	A	A	A	A	G	A	A	G	A	A	A	A	A	G	A	G	G	G
	A	G	G	A	A	A	A	A	A	G	A	A	G	A	G	A	G	G	A	A	0	A	G	G	A	A	0	A	A	G	A	A	A	A	A	G	A	A	G	A	A	A	A	A	G	A	G	G	G
PZE-101029737	T	T	T	T	T	T	C	T	T	T	T	T	C	T	T	T	C	T	T	T	C	C	C	T	T	T	C	T	T	C	T	T	T	C	T	C	T	T	C	T	T	T	T	C	C	T	C	C	0
	T	T	T	T	T	T	C	T	T	T	C	T	C	T	T	T	C	T	T	T	C	C	C	T	T	T	C	T	T	C	T	T	T	C	T	C	T	T	C	T	T	T	T	C	C	T	C	C	0
PZE-101029748	T	G	T	T	G	G	T	T	T	G	G	G	G	G	T	T	T	G	G	T	G	G	T	T	G	T	G	G	G	G	T	T	G	T	G	G	G	T	G	G	G	G	G	T	G	G	G	G	T
	T	G	T	T	G	G	T	T	T	G	G	G	G	G	T	T	T	G	G	T	G	G	T	T	G	T	G	G	G	G	T	T	G	T	G	G	G	T	G	G	G	G	G	T	G	G	G	G	T
PZE-101029759	C	C	T	T	C	T	T	T	C	C	C	C	C	T	C	T	T	C	T	T	T	T	C	T	T	C	T	C	C	C	T	T	T	T	T	T	T	T	C	T	T	C	T	T	T	T	T	T	T
	C	C	T	T	C	T	T	T	C	C	C	C	C	T	C	T	T	C	T	T	T	T	C	T	T	C	T	C	C	C	T	T	T	T	T	T	T	T	C	T	T	C	T	T	T	T	T	T	T
PZE-101029820	T	T	C	C	C	C	C	C	T	T	C	T	T	C	T	C	C	T	C	C	C	C	T	C	T	T	C	C	T	C	C	T	T	C	C	C	C	C	T	T	T	C	C	C	T	C	C	T	C
	T	T	C	C	C	C	C	C	T	T	C	T	T	C	T	C	C	T	C	C	C	C	T	C	T	T	C	C	T	C	C	T	T	C	C	C	C	C	T	T	T	C	C	C	T	C	C	T	C
PZE-101029990	G	G	G	G	A	G	G	G	G	G	G	G	G	G	G	G	G	G	G	G	G	G	G	G	A	G	G	A	G	G	G	G	A	G	G	G	G	A	G	G	A	G	G	G	G	A	G	G	A
	G	G	G	G	A	G	G	G	G	G	G	G	G	G	G	G	G	G	G	G	G	G	G	G	A	G	G	A	G	G	G	G	A	G	G	G	G	A	G	G	A	G	G	G	G	A	G	G	G
PZE-101029991	C	C	C	C	C	C	C	C	C	C	0	C	C	C	C	C	C	C	C	T	C	T	T	C	C	C	C	C	T	C	C	C	C	T	C	C	C	C	C	C	C	T	C	C	T	C	T	C	C
	C	C	C	C	C	C	C	C	C	C	0	C	C	C	C	C	C	C	C	T	C	T	T	C	C	C	C	C	T	C	C	C	C	T	C	C	C	C	C	C	C	T	C	C	T	C	T	C	C
PZE-101030022	C	C	C	C	C	A	C	A	0	C	C	C	C	C	C	C	C	C	C	C	A	C	C	C	C	C	C	C	C	C	C	C	C	C	A	C	C	C	C	C	C	C	C	A	C	C	C	C	0
	C	C	C	C	C	A	C	A	0	C	C	C	C	C	C	C	C	C	C	C	A	C	C	C	C	C	C	C	C	C	C	C	C	C	A	C	C	C	C	C	C	C	C	A	C	C	C	C	0
PZE-101030089	A	C	C	C	A	A	C	C	C	C	C	C	C	C	C	C	C	C	C	C	A	C	C	A	A	C	C	C	C	C	C	C	C	C	A	C	A	C	C	C	C	C	C	C	C	C	C	C	C
	A	C	C	C	C	A	C	C	C	C	C	C	C	C	C	C	C	C	C	C	C	C	C	C	C	C	C	C	C	C	C	C	C	C	A	C	A	C	C	C	C	C	C	C	C	C	C	C	C
PZE-101030211	C	C	C	T	C	C	C	T	C	C	C	C	C	C	T	C	C	C	T	C	T	T	C	C	C	T	C	C	C	C	C	C	C	C	C	C	T	C	T	C	C	C	C	T	C	C	C	C	0
	C	C	C	T	C	C	C	T	C	C	C	C	C	C	T	C	C	C	T	C	T	T	C	C	C	T	C	C	C	C	C	C	C	C	C	C	T	C	T	C	C	C	C	T	C	C	C	C	0
PZE-101030220	C	C	T	T	C	C	C	T	C	C	0	C	C	C	T	C	C	C	T	C	T	T	C	C	C	T	C	C	C	C	C	C	C	C	C	C	T	C	T	C	C	C	C	T	C	C	C	C	T
	C	C	T	T	C	C	C	T	C	C	0	C	C	C	T	C	C	C	T	C	T	T	C	C	C	T	C	C	C	C	C	C	C	C	C	C	T	C	T	C	C	C	C	T	C	C	C	C	C
PZE-101030221	G	A	G	G	A	A	A	G	G	G	0	A	G	A	G	A	A	A	G	G	G	G	G	G	A	G	G	A	G	A	G	A	A	A	G	G	G	A	G	G	G	A	G	G	G	G	A	A	G
	G	A	G	G	A	A	A	G	G	G	0	A	G	A	G	A	A	A	G	G	G	G	G	G	A	G	G	A	G	A	G	A	A	A	G	G	G	A	G	G	G	A	G	G	G	G	A	A	G
PZE-101030251	C	C	C	C	C	C	C	C	C	A	C	C	A	C	C	C	C	C	C	A	C	C	A	A	C	C	A	C	A	C	A	C	C	C	C	A	C	C	C	A	A	C	A	C	A	A	C	C	0
	C	C	C	C	C	C	C	C	C	A	C	C	A	C	C	C	C	C	C	A	C	C	A	A	C	C	A	C	A	C	A	C	C	C	C	A	C	C	C	A	A	C	A	C	A	A	C	C	0
PZE-101030258	T	G	G	G	G	T	G	G	0	G	G	G	G	G	G	G	G	G	G	G	G	G	G	G	G	G	G	G	G	G	G	G	G	G	T	G	G	G	G	G	G	G	G	G	G	G	G	G	G
	T	G	G	G	G	T	G	G	0	G	G	G	G	G	G	G	G	G	G	G	G	G	G	G	G	G	G	G	G	G	G	G	G	G	T	G	G	G	G	G	G	G	G	G	G	G	G	G	G
PZE-101030261	T	T	G	T	T	G	T	T	T	T	T	T	T	T	T	T	T	T	T	T	T	T	T	T	T	T	T	T	T	T	T	T	T	T	T	T	T	T	T	T	T	T	T	T	T	T	T	T	T
	T	T	G	T	T	G	T	T	T	T	T	T	T	T	T	T	T	T	T	T	T	T	T	T	T	T	T	T	T	T	T	T	T	T	T	T	T	T	T	T	T	T	T	T	T	T	T	T	T
PZE-101030263	C	C	C	C	C	T	C	C	C	C	C	C	C	C	C	C	C	C	C	C	C	C	C	C	C	C	C	C	C	C	C	C	C	C	C	C	C	C	C	C	C	C	C	C	C	C	C	C	C
	C	C	C	C	C	T	C	C	C	C	C	C	C	C	C	C	C	C	C	C	C	C	C	C	C	C	C	C	C	C	C	C	C	C	C	C	C	C	C	C	C	C	C	C	C	C	C	C	C
PZE-101030280	C	T	C	C	C	T	C	C	C	T	C	C	C	C	C	C	C	C	C	C	C	C	C	C	C	C	C	C	C	C	C	C	C	C	C	C	C	C	C	C	C	C	C	C	C	C	C	C	C
	C	T	C	C	C	T	C	C	C	T	C	C	C	C	C	C	C	C	C	C	C	C	C	C	C	C	C	C	C	C	C	C	C	C	C	C	C	C	C	C	C	C	C	C	C	C	C	C	C
PZE-101030300	G	A	A	A	A	G	A	A	A	A	0	A	A	A	A	A	G	A	A	A	A	A	A	A	A	A	A	A	A	A	A	A	A	A	A	A	A	A	A	A	A	A	G	A	A	A	A	G	A
	G	A	A	A	A	G	A	A	A	A	0	A	A	A	A	A	G	A	A	A	A	A	A	A	A	A	A	A	A	A	A	A	A	A	A	A	A	A	A	A	A	A	G	A	A	A	A	G	A
PZE-101030302	T	T	T	T	T	C	T	T	T	T	T	T	T	T	T	T	T	T	T	T	C	T	T	T	T	T	T	T	T	T	T	T	T	T	C	T	T	T	T	T	T	T	C	T	T	T	T	T	T
	T	T	T	T	T	C	T	T	T	T	T	T	T	T	T	T	T	T	T	T	C	T	T	T	T	T	T	T	T	T	T	T	T	T	C	T	T	T	T	T	T	T	C	T	T	T	T	T	T
PZE-101030429	C	A	A	C	0	C	C	C	A	A	A	C	C	C	C	C	A	C	C	A	C	A	A	A	C	C	C	C	C	C	C	A	A	C	0	A	C	C	C	A	0	A	C	0	C	C	0	A	C
	C	A	A	C	0	C	C	C	A	A	A	C	C	C	C	C	A	C	C	A	C	A	A	A	C	C	C	C	C	C	C	A	A	C	0	A	C	C	C	A	0	A	C	0	C	C	0	A	C
PZE-101030508	G	A	G	A	0	G	A	G	A	A	A	A	G	A	G	A	A	A	G	A	G	0	0	A	G	A	G	G	G	G	A	0	A	A	G	A	G	0	A	A	A	A	G	G	0	0	G	A	A
	G	A	G	A	0	G	A	G	A	A	A	A	G	A	G	A	A	A	G	A	G	0	0	A	G	A	G	G	G	G	A	0	A	A	G	A	G	0	A	A	A	A	G	G	0	0	G	A	G
PZE-101030561	T	G	T	G	T	G	G	T	0	T	0	T	G	T	G	G	T	T	T	G	G	G	T	T	T	T	G	G	T	T	G	T	G	G	G	T	G	T	T	T	G	G	G	G	G	T	T	G	G
	T	G	T	G	T	G	G	T	0	T	0	T	G	T	G	G	T	T	T	G	G	G	T	T	T	T	G	G	T	T	G	T	G	G	G	T	G	T	T	T	G	G	G	G	G	T	T	G	G
PZE-101030616	G	A	G	G	G	G	0	G	0	A	G	A	A	G	G	G	G	A	G	A	A	G	G	A	A	G	A	A	G	G	0	G	A	A	A	G	A	G	G	G	A	A	A	A	G	G	A	G	A
	G	A	G	G	G	G	0	G	0	A	G	A	A	G	G	G	G	A	G	A	A	G	G	A	A	G	A	A	G	G	0	G	A	A	A	G	A	G	G	G	A	A	A	A	G	G	A	G	A
PZE-101030692	T	T	T	C	C	T	C	T	T	C	T	T	T	T	C	C	T	C	T	C	C	T	T	C	C	C	T	C	C	C	C	0	T	C	T	C	C	C	C	C	T	C	T	C	C	T	C	C	T
	T	T	T	C	C	T	C	T	T	C	T	T	T	T	C	C	T	C	T	C	C	T	T	C	C	C	T	C	C	C	C	0	T	C	T	C	C	C	C	C	T	C	T	C	C	T	C	C	C
PZE-101030875	G	T	G	G	G	G	G	T	G	G	G	T	G	T	G	G	G	T	T	G	T	0	G	T	T	G	T	T	T	0	T	T	G	T	G	T	G	G	T	T	T	T	G	T	T	T	T	G	T
	G	T	G	G	G	G	G	T	G	G	G	T	G	T	G	G	G	T	T	G	T	0	G	T	T	G	T	T	T	0	T	T	G	T	G	T	G	G	T	T	T	T	G	T	T	T	T	G	T
PZE-101030925	G	G	G	G	A	G	G	G	G	G	0	G	G	G	G	G	G	G	G	G	G	A	G	0	G	A	A	G	G	A	G	G	G	G	G	A	G	G	G	G	G	G	G	G	G	G	G	G	A
	G	G	G	G	A	G	G	G	G	G	0	G	G	G	G	G	G	G	G	G	G	A	G	0	G	A	A	G	G	A	G	G	G	G	G	A	G	G	G	G	G	G	G	G	G	G	G	G	A
PZE-101031043	G	A	A	G	A	A	G	A	0	G	A	A	A	G	G	G	A	G	A	G	A	A	G	G	A	A	G	G	A	A	A	A	A	A	G	A	A	A	G	A	A	A	G	A	A	A	A	G	A
	G	A	A	G	A	A	G	A	0	G	A	A	A	G	G	G	A	G	A	G	A	A	G	G	A	A	G	G	A	A	A	A	A	A	G	A	A	A	G	A	A	A	G	A	A	A	A	G	G
PZE-101031053	A	C	C	C	C	C	C	C	C	C	C	C	C	C	C	C	C	C	C	C	C	C	C	C	C	C	C	0	C	C	C	C	C	C	C	C	C	C	C	C	C	C	A	C	C	C	C	C	C
	A	C	C	C	C	C	C	C	C	C	C	C	C	C	C	C	C	C	C	C	C	C	C	C	C	C	C	0	C	C	C	C	C	C	C	C	C	C	C	C	C	C	A	C	C	C	C	C	C
PZE-101031077	C	C	T	T	T	T	T	C	C	T	C	C	T	T	T	T	T	T	C	C	T	T	T	C	C	T	T	C	C	T	T	C	C	C	T	C	C	C	T	C	T	C	C	T	C	T	C	T	T
	C	C	T	T	T	T	T	C	C	T	C	C	T	T	T	T	T	T	C	C	T	T	T	C	C	T	T	C	C	T	T	C	C	C	T	C	C	C	T	C	T	C	C	T	C	T	C	T	T
PZE-101031146	C	C	C	G	C	G	G	G	C	C	C	C	G	C	G	G	G	G	C	C	C	C	G	C	C	C	0	C	C	C	G	C	C	C	C	C	C	C	C	C	C	G	C	C	G	C	C	G	C
	C	C	C	G	C	G	G	G	C	C	C	C	G	C	G	G	G	G	C	C	C	C	G	C	C	C	0	C	C	C	G	C	C	C	C	C	C	C	C	C	C	G	C	C	G	C	C	G	C
PZE-101031542	T	T	A	A	A	T	A	A	A	A	T	T	T	A	A	A	A	A	T	T	A	T	A	T	T	A	A	T	T	A	A	T	T	T	T	T	A	A	A	T	T	A	A	T	A	T	A	A	A
	T	T	A	A	A	T	A	A	A	A	T	T	T	A	A	A	A	A	T	T	A	T	A	T	T	A	A	T	T	A	A	T	T	T	T	T	A	A	A	T	T	A	A	T	A	T	A	A	T
PZE-101031655	C	G	G	G	C	C	G	G	C	G	G	G	C	G	G	G	C	G	G	G	C	G	C	C	C	G	G	C	G	C	C	G	G	C	C	G	C	C	G	C	C	C	C	G	G	C	C	C	C
	C	G	G	G	C	C	G	G	C	G	G	G	C	G	G	G	C	G	G	G	C	G	C	C	C	G	G	C	G	C	C	G	G	C	C	G	C	C	G	C	C	C	C	G	G	C	C	C	C
PZE-101031636	T	0	G	G	T	T	0	0	T	G	G	G	G	0	G	T	T	G	G	G	T	G	T	G	T	0	G	T	G	T	T	0	0	T	T	G	T	0	T	T	T	G	G	G	G	T	G	G	T
	T	0	G	G	T	T	0	0	T	G	G	G	G	0	G	T	T	G	G	G	T	G	T	G	T	0	G	T	G	T	T	0	0	T	T	G	T	0	T	T	T	G	G	G	G	T	G	G	T
PZE-101032015	G	A	A	A	A	A	G	A	A	G	G	A	A	G	A	A	A	G	A	A	G	A	A	A	A	A	A	A	A	A	A	A	A	A	A	A	A	A	G	A	A	A	G	G	A	A	A	A	A
	G	A	A	A	A	A	G	A	A	G	G	A	A	G	A	A	A	G	A	A	G	A	A	A	A	A	A	A	A	A	A	A	A	A	A	A	A	A	G	A	A	A	G	G	A	A	A	A	A
PZE-101032230	C	C	C	T	C	C	C	C	C	C	0	C	T	C	C	C	C	T	T	C	C	T	C	T	C	C	T	C	C	C	C	C	C	C	C	C	C	C	C	C	C	T	C	T	C	C	T	C	C
	C	C	C	T	C	C	C	C	C	C	0	C	T	C	C	C	C	T	T	C	C	T	C	T	C	C	T	C	C	C	C	C	C	C	C	C	C	C	C	C	C	T	C	T	C	C	T	C	C
PZE-101032231	C	T	T	C	C	T	C	T	T	T	0	T	C	T	T	C	T	C	C	T	T	C	C	C	C	C	C	C	C	C	C	C	C	T	C	C	T	T	C	C	C	C	T	C	T	C	C	C	C
	C	T	T	C	C	T	C	T	T	T	0	T	C	T	T	C	T	C	C	T	T	C	C	C	C	C	C	C	C	C	C	C	C	T	C	C	T	T	C	C	C	C	T	C	T	C	C	C	C
PZE-101032246	C	A	A	C	C	A	C	C	A	A	A	C	A	C	C	C	A	C	A	A	C	A	A	A	A	C	A	C	A	C	C	C	C	A	C	A	A	A	C	C	C	A	C	A	A	C	C	A	C
	C	A	A	C	C	A	C	C	A	A	A	C	A	C	C	C	A	C	A	A	C	A	A	A	A	C	A	C	A	C	C	C	C	A	C	A	A	A	C	C	C	A	C	A	A	C	C	A	C
PZE-101032249	G	G	A	G	G	A	G	G	G	G	0	G	A	G	G	G	G	G	A	G	G	A	A	G	A	G	A	G	A	G	G	G	G	A	G	G	G	G	G	G	G	A	G	A	G	G	G	A	G
	G	G	A	G	G	A	G	G	G	G	0	G	A	G	G	G	G	G	A	G	G	A	A	G	A	G	A	G	A	G	G	G	G	A	G	G	G	G	G	G	G	A	G	A	G	G	G	A	G
PZE-101032313	G	G	G	G	G	G	G	G	G	G	G	G	G	G	G	G	G	G	G	G	G	G	G	G	G	G	G	G	G	G	G	G	G	G	G	A	G	G	G	G	G	G	G	G	G	G	G	G	G
	G	G	G	G	G	G	G	G	G	G	G	G	G	G	G	G	G	G	G	G	G	G	G	G	G	G	G	G	G	G	G	G	G	G	G	A	G	G	G	G	G	G	G	G	G	G	G	G	G
PZE-101032318	A	G	G	A	G	G	A	G	G	G	A	G	G	G	G	A	G	G	G	A	G	G	G	G	G	A	G	G	G	G	A	G	G	G	G	A	A	G	A	G	G	G	G	G	G	A	G	G	G
	A	G	G	A	G	G	A	G	G	G	A	G	G	G	G	A	G	G	G	A	G	G	G	G	G	A	G	G	G	G	A	G	G	G	G	A	A	G	A	G	G	G	G	G	G	A	G	G	G
PZE-101032517	T	C	T	T	T	T	C	T	T	C	T	C	T	T	C	C	T	C	T	T	T	C	C	T	C	C	T	T	T	T	C	C	C	T	C	T	C	C	T	C	T	T	T	T	T	T	T	C	T
	T	C	T	T	T	T	C	T	T	C	C	C	T	T	C	C	T	C	T	T	T	C	C	T	C	C	T	T	T	T	C	C	C	T	C	T	C	C	T	C	T	T	T	T	T	T	T	C	T
PZE-101032702	T	T	T	T	C	T	T	C	T	T	T	T	T	T	C	T	T	C	T	C	T	T	C	T	C	T	C	T	0	T	T	T	T	C	C	T	T	C	T	C	C	T	T	T	T	T	C	T	T
	T	T	T	T	C	T	T	C	T	T	T	T	T	T	C	T	T	C	T	C	T	T	C	T	C	T	C	T	0	T	T	T	T	C	C	T	T	C	T	C	C	T	T	T	T	T	C	T	T
PZE-101032703	A	A	A	A	A	A	A	A	A	A	A	A	A	A	G	A	A	A	A	A	A	A	A	A	A	A	G	A	G	A	A	A	A	A	A	A	A	A	A	G	G	A	A	A	A	A	A	A	A
	A	A	A	A	A	A	A	A	A	A	A	A	A	A	G	A	A	A	A	A	A	A	A	A	A	A	G	A	G	A	A	A	A	A	A	A	A	A	A	G	G	A	A	A	A	A	A	A	A
PZE-101032704	G	A	G	G	G	G	A	G	G	G	G	A	G	A	A	A	G	G	G	G	G	A	G	G	G	A	A	G	A	G	A	A	G	G	G	G	G	G	A	A	A	G	G	G	G	G	G	A	G
	G	A	G	G	G	G	A	G	G	G	G	A	G	A	A	A	G	G	G	G	G	A	G	G	G	A	A	G	A	G	A	A	G	G	G	G	G	G	A	A	A	G	G	G	G	G	G	A	G
PZE-101032822	A	A	A	A	A	A	A	A	A	A	A	A	C	A	A	A	A	A	A	C	A	A	A	A	A	A	A	A	A	A	A	A	C	A	C	A	A	A	A	A	C	A	A	A	A	A	C	A	A
	A	A	A	A	A	A	A	A	A	A	A	A	C	A	A	A	A	A	A	C	A	A	A	A	A	A	A	A	A	A	A	A	C	A	C	A	A	A	A	A	C	A	A	A	A	A	C	A	A
PZE-101032815	A	A	A	A	A	A	A	A	A	A	A	A	G	A	A	A	A	A	A	G	A	A	A	A	A	A	A	A	A	A	A	A	G	A	G	A	A	A	A	A	G	A	A	A	A	A	G	A	A
	A	A	A	A	A	A	A	A	A	A	A	A	G	A	A	A	A	A	A	G	A	A	A	A	A	A	A	A	A	A	A	A	G	A	G	A	A	A	A	A	G	A	A	A	A	A	G	A	A
PZE-101032846	A	A	A	A	A	A	A	A	A	A	A	A	G	A	A	A	A	A	A	G	A	A	A	A	A	A	A	A	A	A	A	A	A	A	A	A	A	A	A	A	G	A	A	A	A	A	G	A	A
	A	A	A	A	A	A	A	A	A	A	A	A	G	A	A	A	A	A	A	G	A	A	A	A	A	A	A	A	A	A	A	A	A	A	A	A	A	A	A	A	G	A	A	A	A	A	G	A	A
PZE-101032884	G	G	G	G	G	G	G	G	G	G	G	G	G	G	G	G	G	A	G	G	G	G	G	G	G	G	G	A	A	A	A	G	A	G	G	G	G	G	G	G	G	G	G	G	G	G	G	G	A
	G	G	G	G	G	G	G	G	G	G	G	G	G	G	G	G	G	A	G	G	G	G	G	G	G	G	G	A	A	A	A	G	A	G	G	G	G	G	G	G	G	G	G	G	G	G	G	G	G
PZE-101032933	A	A	A	A	G	A	A	G	A	G	A	A	A	A	A	A	A	A	A	A	A	A	A	A	A	A	A	A	A	A	G	A	A	A	A	A	A	A	A	A	A	A	A	A	G	A	A	A	A
	A	A	A	A	G	A	A	G	A	G	A	A	A	A	A	A	A	A	A	A	A	A	A	A	A	A	A	A	A	A	G	A	A	A	A	A	A	A	A	A	A	A	A	A	G	A	A	A	A
PZE-101032948	G	G	G	G	G	G	G	G	G	G	G	G	A	G	G	G	G	G	G	G	G	A	G	A	G	G	G	G	G	G	G	G	G	A	G	G	G	G	A	A	G	A	G	G	G	G	G	G	G
	G	G	G	G	G	G	G	G	G	G	G	G	A	G	G	G	G	G	G	G	G	A	G	A	G	G	G	G	G	G	G	G	G	A	G	G	G	G	A	A	G	A	G	G	G	G	G	G	G
PZE-101032956	T	C	C	T	C	C	C	C	T	C	C	C	C	C	C	T	T	C	T	C	T	C	C	C	T	C	T	C	C	C	C	T	C	C	C	C	T	C	C	C	C	C	C	C	C	T	C	C	0
	T	C	C	T	C	C	C	C	T	C	C	C	C	C	C	T	T	C	T	C	T	C	C	C	T	C	T	C	C	C	C	T	C	C	C	C	T	C	C	C	C	C	C	C	C	T	C	C	0
PZE-101032957	G	G	G	G	G	G	G	G	G	G	G	G	G	G	G	G	G	G	G	G	G	G	G	A	G	G	G	G	G	G	G	G	G	A	G	G	G	G	G	A	G	A	G	G	G	G	G	G	G
	G	G	G	G	G	G	G	G	G	G	G	G	G	G	G	G	G	G	G	G	G	G	G	A	G	G	G	G	G	G	G	G	G	A	G	G	G	G	G	A	G	A	G	G	G	G	G	G	G
PZE-101032973	C	T	T	C	T	T	T	T	C	T	T	T	T	T	T	C	C	T	C	T	C	T	T	C	C	T	C	T	T	T	T	C	T	C	T	T	C	T	T	C	T	C	T	T	T	C	T	T	0
	C	T	T	C	T	T	T	T	C	T	T	T	T	T	T	C	C	T	C	T	C	T	T	C	C	T	C	T	T	T	T	C	T	C	T	T	C	T	T	C	T	C	T	T	T	C	T	T	0
PZE-101032974	A	G	G	A	G	G	G	G	A	G	G	G	G	G	G	A	A	G	A	G	A	G	G	A	A	G	A	G	G	G	G	A	G	A	G	G	A	G	G	A	G	A	G	G	G	A	G	G	0
	A	G	G	A	G	G	G	G	A	G	G	G	G	G	G	A	A	G	A	G	A	G	G	A	A	G	A	G	G	G	G	A	G	A	G	G	A	G	G	A	G	A	G	G	G	A	G	G	0
PZE-101032978	G	T	G	G	G	T	G	G	G	G	T	G	G	G	G	G	G	G	G	T	G	G	G	G	G	G	G	T	G	T	G	G	G	G	G	T	G	G	G	G	T	G	G	G	G	G	T	G	0
	G	T	G	G	G	T	G	G	G	G	T	G	G	G	G	G	G	G	G	T	G	G	G	G	G	G	G	T	G	T	G	G	G	G	G	T	G	G	G	G	T	G	G	G	G	G	T	G	0
PZE-101032991	C	T	C	C	C	T	C	C	C	C	C	C	C	C	C	C	C	C	C	T	C	C	C	C	C	C	C	C	T	C	C	C	C	C	T	T	C	C	C	C	T	C	C	C	C	C	T	C	C
	C	T	C	C	C	T	C	C	C	C	C	C	C	C	C	C	C	C	C	T	C	C	C	C	C	C	C	C	T	C	C	C	C	C	T	T	C	C	C	C	T	C	C	C	C	C	T	C	C
PZE-101033005	A	C	C	A	C	C	C	C	A	C	C	C	C	C	0	A	A	C	A	C	A	C	C	A	A	C	A	C	C	C	C	C	C	A	0	C	A	C	C	C	C	A	C	C	C	A	C	C	A
	A	C	C	A	C	C	C	C	A	C	C	C	C	C	0	A	A	C	A	C	A	C	C	A	A	C	A	C	C	C	C	C	C	A	0	C	A	C	C	C	C	A	C	C	C	A	C	C	C
PZE-101033065	G	G	G	G	G	G	G	G	G	G	G	G	G	G	G	G	G	G	G	G	G	G	G	A	G	G	G	G	G	G	G	G	G	A	G	G	G	G	G	G	G	A	G	G	G	G	G	G	G
	G	G	G	G	G	G	G	G	G	G	G	G	G	G	G	G	G	G	G	G	G	G	G	A	G	G	G	G	G	G	G	G	G	A	G	G	G	G	G	G	G	A	G	G	G	G	G	G	G
PZE-101033119	T	C	C	T	C	C	C	C	T	C	C	C	C	C	C	T	T	C	T	C	T	C	C	C	T	C	T	C	C	C	C	C	C	C	C	C	T	C	C	C	C	C	C	C	C	T	C	C	0
	T	C	C	T	C	C	C	C	T	C	C	C	C	C	C	T	T	C	T	C	T	C	C	C	T	C	T	C	C	C	C	C	C	C	C	C	T	C	C	C	C	C	C	C	C	T	C	C	0
PZE-101033184	G	T	T	G	G	G	G	T	0	T	T	T	T	T	G	G	G	T	G	T	G	G	T	0	T	G	0	T	T	T	T	0	T	G	T	G	G	T	T	T	G	G	G	T	T	T	T	G	T
	G	T	T	G	G	G	G	T	0	T	T	T	T	T	G	G	G	T	G	T	G	G	T	0	T	G	0	T	T	T	T	0	T	G	T	G	G	T	T	T	G	G	G	T	T	T	T	G	G
PZE-101033489	G	A	A	G	G	G	G	G	G	A	G	A	G	A	G	G	G	G	G	G	G	G	G	A	A	G	G	G	G	G	A	A	G	G	A	A	G	A	G	G	A	A	G	A	A	A	A	G	A
	G	A	A	G	G	G	G	G	G	A	G	A	G	A	G	G	G	G	G	G	G	G	G	A	A	G	G	G	G	G	A	A	G	G	A	A	G	A	G	G	A	A	G	A	A	A	A	G	G
PZE-101033613	T	T	T	C	C	T	T	T	C	T	C	T	C	T	C	C	C	T	T	C	C	C	T	T	T	T	C	C	T	C	T	C	T	C	C	C	C	C	T	T	C	T	T	C	T	C	C	T	T
	T	T	T	C	C	T	T	T	C	T	C	T	C	T	C	C	C	T	T	C	C	C	T	T	T	T	C	C	T	C	T	C	T	C	C	C	C	C	T	T	C	T	T	C	T	C	C	T	C
PZE-101033622	T	T	T	T	T	T	T	T	T	T	T	T	C	T	C	T	T	T	C	C	T	T	T	T	T	T	T	T	C	T	T	C	T	C	C	C	T	C	T	T	T	T	T	C	T	T	C	T	T
	T	T	T	T	T	T	T	T	T	T	T	T	C	T	C	T	T	T	C	C	T	T	T	T	T	T	T	T	C	T	T	C	T	C	C	C	T	C	T	T	T	T	T	C	T	T	C	T	T
PZE-101033801	A	C	A	A	A	C	A	C	A	C	0	A	A	A	C	C	A	A	A	A	A	C	A	C	C	A	A	A	C	A	C	C	A	C	C	A	C	C	A	C	C	C	C	A	C	C	C	A	0
	A	C	A	A	A	C	A	C	A	C	0	A	A	A	C	C	A	A	A	A	A	C	A	C	C	A	A	A	C	A	C	C	A	C	C	A	C	C	A	C	C	C	C	A	C	C	C	A	0
PZE-101033968	G	G	A	G	A	G	G	A	G	A	G	A	G	G	A	G	G	G	G	G	G	0	G	G	G	G	0	A	G	A	G	0	A	G	A	G	A	G	A	A	A	A	A	A	G	A	0	G	G
	G	G	A	G	A	G	G	A	G	A	G	A	G	G	A	G	G	G	G	G	G	0	G	G	G	G	0	A	G	A	G	0	A	G	A	G	A	G	A	A	A	A	A	A	G	A	0	G	G
PZE-101034048	G	G	G	G	G	G	G	A	G	G	G	G	G	G	G	G	G	G	G	G	G	G	G	G	G	G	G	G	A	G	G	G	G	G	G	G	G	G	G	G	G	G	G	G	G	G	G	G	G
	G	G	G	G	G	G	G	A	G	G	G	G	G	G	G	G	G	G	G	G	G	G	G	G	G	G	G	G	A	G	G	G	G	G	G	G	G	G	G	G	G	G	G	G	G	G	G	G	G
PZE-101034052	C	C	C	0	C	C	C	0	C	C	C	C	C	C	T	C	C	C	T	0	C	C	C	T	C	T	C	C	0	C	0	T	0	C	C	C	C	C	0	C	0	C	0	C	0	C	T	C	C
	C	C	C	0	C	C	C	0	C	C	C	C	C	C	T	C	C	C	T	0	C	C	C	T	C	T	C	C	0	C	0	T	0	C	C	C	C	C	0	C	0	C	0	C	0	C	T	C	C
PZE-101034085	G	G	G	G	G	G	G	G	G	G	G	G	A	G	G	G	G	G	G	G	G	G	G	G	G	G	G	G	A	G	G	G	G	G	G	G	G	G	G	A	A	G	G	G	G	G	G	G	G
	G	G	G	G	G	G	G	G	G	G	G	G	A	G	G	G	G	G	G	G	G	G	G	G	G	G	G	G	A	G	G	G	G	G	G	G	G	G	G	A	A	G	G	G	G	G	G	G	G
PZE-101034091	G	G	G	G	G	G	G	G	G	G	G	G	A	G	G	G	G	G	G	G	G	G	A	A	A	G	G	G	A	G	A	G	A	A	G	G	G	A	G	G	A	A	G	G	A	G	A	G	0
	G	G	G	G	G	G	G	G	G	G	G	G	A	G	G	G	G	G	G	G	G	G	A	A	A	G	G	G	A	G	A	G	A	A	G	G	G	A	G	G	A	A	G	G	A	G	A	G	0
PZE-101034101	T	T	T	T	T	T	T	T	T	T	T	T	C	T	T	T	T	T	T	T	T	T	C	C	C	T	T	T	C	T	C	T	C	C	T	T	T	C	T	T	C	C	T	T	C	T	C	T	T
	T	T	T	T	T	T	T	T	T	T	T	T	C	T	T	T	T	T	T	T	T	T	C	C	C	T	T	T	C	T	C	T	C	C	T	T	T	C	T	T	C	C	T	T	C	T	C	T	C
PZE-101034395	C	A	C	C	C	C	C	C	C	A	C	A	C	C	C	C	A	C	C	A	A	C	C	C	C	C	C	C	C	C	A	C	C	C	C	C	C	A	C	C	C	C	C	C	A	C	C	C	C
	C	A	C	C	C	C	C	C	C	A	C	A	C	C	C	C	A	C	C	A	A	C	C	C	C	C	C	C	C	C	A	C	C	C	C	C	C	A	C	C	C	C	C	C	A	C	C	C	C
PZE-101034427	G	A	A	G	G	A	G	A	G	A	G	A	A	G	G	A	A	G	G	G	A	G	A	A	A	A	G	A	A	A	G	A	A	A	G	A	G	A	G	A	A	A	G	G	G	G	A	A	0
	G	A	A	G	G	A	G	A	G	A	G	A	A	G	G	A	A	G	G	G	A	G	A	A	A	A	G	A	A	A	G	A	A	A	G	A	G	A	G	A	A	A	G	G	G	G	A	A	0
PZE-101034431	A	A	A	A	A	A	A	A	A	A	A	A	A	A	A	A	A	A	A	A	G	A	A	A	A	A	A	A	A	A	A	A	A	G	A	A	A	A	A	A	A	G	A	A	A	A	A	A	A
	A	A	A	A	A	A	A	A	A	A	A	A	A	A	A	A	A	A	A	A	G	A	A	A	A	A	A	A	A	A	A	A	A	G	A	A	A	A	A	A	A	G	A	A	A	A	A	A	A
PZE-101034578	T	T	T	T	T	T	T	T	T	T	T	T	C	T	T	T	T	T	T	T	T	T	T	T	C	T	T	T	T	T	T	T	T	T	T	C	T	T	T	C	T	T	T	T	T	T	T	T	T
	T	T	T	T	T	T	T	T	T	T	T	T	C	T	T	T	T	T	T	T	T	T	T	T	C	T	T	T	T	T	T	T	T	T	T	C	T	T	T	C	T	T	T	T	T	T	T	T	T
PZE-101035008	T	T	T	T	T	G	T	G	G	T	G	T	G	T	T	T	G	T	G	G	G	G	T	G	T	T	T	T	T	G	G	T	T	G	G	T	G	G	T	G	T	G	T	T	G	G	G	G	T
	T	T	T	T	T	G	T	G	G	T	G	T	G	T	T	T	G	T	G	G	G	G	T	G	T	T	T	T	T	G	G	T	T	G	G	T	G	G	T	G	T	G	T	T	G	G	G	G	T
PZE-101035105	T	T	T	T	T	G	T	T	G	T	T	T	T	T	T	T	T	T	T	T	G	G	T	T	T	T	T	T	T	T	T	T	T	T	T	T	T	T	T	T	T	T	T	T	T	T	T	T	T
	T	T	T	T	T	G	T	T	G	T	T	T	T	T	T	T	T	T	T	T	G	G	T	T	T	T	T	T	T	T	T	T	T	T	T	T	T	T	T	T	T	T	T	T	T	T	T	T	T
PZE-101035119	A	A	A	A	A	C	A	A	A	A	0	A	A	A	A	A	A	A	A	A	C	C	A	A	A	A	A	A	A	A	A	A	A	A	A	A	A	A	A	A	A	A	A	A	A	A	A	A	A
	A	A	A	A	A	C	A	A	A	A	0	A	A	A	A	A	A	A	A	A	C	C	A	A	A	A	A	A	A	A	A	A	A	A	A	A	A	A	A	A	A	A	A	A	A	A	A	A	A
PZE-101035605	0	C	T	0	C	0	C	C	0	T	0	0	C	C	C	T	C	T	T	T	T	C	T	C	C	T	T	C	C	C	T	C	C	C	T	C	T	C	C	C	T	C	0	0	C	T	C	C	0
	0	C	T	0	C	0	C	C	0	T	0	0	C	C	C	T	C	T	T	T	T	C	T	C	C	T	T	C	C	C	T	C	C	C	C	C	T	C	C	C	T	C	0	0	C	T	C	C	0
PZE-101035640	A	G	A	A	G	A	G	G	A	A	A	A	G	G	G	A	G	A	A	A	A	G	A	G	A	A	A	A	A	A	G	G	G	G	G	G	A	G	G	G	G	A	A	G	G	A	G	G	G
	A	G	A	A	G	A	G	G	A	A	A	A	G	G	G	A	G	A	A	A	A	G	A	G	A	A	A	A	A	A	G	G	G	G	G	G	A	G	G	G	G	A	A	G	G	A	G	G	G
PZE-101035691	G	G	G	G	A	0	G	G	G	G	A	G	A	G	G	G	G	A	0	G	A	A	A	0	A	G	A	A	A	A	0	0	A	A	0	G	G	A	G	A	A	G	G	A	A	0	A	A	A
	G	G	G	G	A	0	G	G	G	G	A	G	A	G	G	G	G	A	0	G	A	A	A	0	A	G	A	A	A	A	0	0	A	A	0	G	G	A	G	A	A	G	G	A	A	0	A	A	A
PZE-101035737	C	C	C	T	C	C	T	C	T	T	C	T	C	T	T	T	T	C	C	T	C	C	C	C	C	C	T	T	T	C	C	C	C	C	C	C	T	C	C	C	C	C	T	C	C	T	C	C	C
	C	C	C	T	C	C	T	C	T	T	C	T	C	T	T	T	T	C	C	T	C	C	C	C	C	C	T	T	T	C	C	C	C	C	C	C	T	C	C	C	C	C	T	C	C	T	C	C	C
PZE-101036205	G	G	G	G	G	G	G	G	G	G	G	G	G	G	G	G	G	G	G	A	G	G	G	G	G	G	G	G	A	G	A	G	G	G	G	G	G	G	G	G	A	G	G	G	G	A	G	G	A
	G	G	G	G	G	G	G	G	G	G	G	G	G	G	G	G	G	G	G	A	G	G	G	G	G	G	G	G	A	G	A	G	G	G	G	G	G	G	G	G	A	G	G	G	G	A	G	G	G
PZE-101036305	A	A	G	G	A	A	A	A	G	G	0	A	G	A	G	G	G	A	G	G	G	G	G	A	G	G	A	A	A	G	G	G	G	A	G	G	G	G	G	A	G	G	G	A	G	G	A	G	0
	A	A	G	G	A	A	A	A	G	G	0	A	G	A	G	G	G	A	G	G	G	G	G	A	G	G	A	A	A	G	G	G	G	A	G	G	G	G	G	A	G	G	G	A	G	G	A	G	0
PZE-101036310	T	T	T	C	T	T	T	T	C	C	T	T	C	T	C	C	C	T	C	C	C	C	T	T	C	C	T	T	T	T	T	C	C	T	T	C	T	T	T	T	C	C	C	T	T	C	T	T	T
	T	T	T	C	T	T	T	T	C	C	C	T	C	T	C	C	C	T	C	C	C	C	T	T	C	C	T	T	T	T	T	C	C	T	T	C	T	T	T	T	C	C	C	T	T	C	T	T	C
PZE-101036318	G	A	G	G	A	A	G	A	G	G	A	A	G	G	G	G	G	A	G	G	G	G	G	A	G	G	A	A	A	G	G	G	G	A	G	G	G	G	G	A	G	G	G	A	A	G	A	A	0
	G	A	G	G	A	A	G	A	G	G	A	A	G	G	G	G	G	A	G	G	G	G	G	A	G	G	A	A	A	G	G	G	G	A	G	G	G	G	G	A	G	G	G	A	A	G	A	A	0
PZE-101036338	G	A	G	G	A	A	G	A	G	G	0	A	G	G	G	G	A	A	G	G	G	G	G	A	G	G	A	G	A	G	G	G	G	G	G	A	G	G	G	G	G	A	G	A	G	G	A	G	0
	G	A	G	G	A	A	G	A	G	G	0	A	G	G	G	G	A	A	G	G	G	G	G	A	G	G	A	G	A	G	G	G	G	G	G	A	G	G	G	G	G	A	G	A	G	G	A	G	0
PZE-101036444	G	G	G	0	A	A	G	G	G	G	0	G	G	G	G	G	G	G	G	G	G	G	G	G	G	G	0	G	A	G	G	A	0	A	G	G	G	G	G	G	G	G	G	A	G	G	A	G	0
	G	G	G	0	A	A	G	G	G	G	0	G	G	G	G	G	G	G	G	G	G	G	G	G	G	G	0	G	G	G	G	A	0	A	G	G	G	G	G	G	G	G	G	A	G	G	G	G	0
PZE-101036423	C	C	C	C	C	C	C	C	0	C	C	C	C	C	C	C	C	C	C	C	C	C	C	C	C	C	C	T	C	C	C	C	C	C	C	C	C	C	C	C	T	C	C	C	C	C	C	C	C
	C	C	C	C	C	C	C	C	0	C	C	C	C	C	C	C	C	C	C	C	C	C	C	C	C	C	C	T	C	C	C	C	C	C	C	C	C	C	C	C	T	C	C	C	C	C	C	C	C
PZE-101036609	A	A	G	A	G	G	A	A	A	A	G	A	A	A	A	A	A	G	A	G	A	A	A	A	A	G	G	A	A	A	A	A	A	A	A	A	G	A	A	A	A	A	A	G	A	A	G	A	G
	A	A	G	A	G	G	A	A	A	A	G	A	A	A	A	A	A	G	A	G	A	A	A	A	A	G	G	A	A	A	A	A	A	A	A	A	G	A	A	A	A	A	A	G	A	A	G	A	G
PZE-101036683	G	G	G	G	G	G	G	G	G	G	G	G	G	G	G	A	G	G	A	G	G	G	A	0	G	A	G	G	G	G	A	G	A	G	A	A	G	A	G	G	A	A	G	G	G	A	G	G	G
	G	G	G	G	G	G	G	G	G	G	G	G	G	G	G	A	G	G	A	G	G	G	A	0	G	A	G	G	G	G	A	G	A	G	A	A	G	A	G	G	A	A	G	G	G	A	G	G	G
PZE-101036799	G	T	G	G	T	T	G	T	G	G	G	T	G	G	G	G	G	T	G	T	G	G	G	G	T	G	G	G	T	T	T	T	G	T	G	G	G	T	T	G	T	G	G	T	T	G	T	T	T
	G	T	G	G	T	T	G	T	G	G	G	T	G	G	G	G	G	T	G	T	G	G	G	G	T	G	G	G	T	T	T	T	G	T	G	G	G	T	T	G	T	G	G	T	T	G	T	T	G
PZE-101036862	T	G	G	T	G	G	T	G	T	T	G	G	G	T	T	T	G	G	G	G	G	G	T	T	T	T	G	T	G	T	G	G	T	G	T	G	G	G	G	G	G	T	T	G	G	G	G	G	G
	T	G	G	T	G	G	T	G	T	T	G	G	G	T	T	T	G	G	G	G	G	G	T	T	T	T	G	T	G	T	G	G	T	G	T	G	G	G	G	G	G	T	T	G	G	G	G	G	G
PZE-101036864	A	A	A	A	A	A	A	A	A	A	A	A	A	A	A	A	G	A	A	A	A	A	A	A	A	A	A	A	G	A	A	A	A	A	A	A	A	A	A	A	A	A	A	A	A	A	A	A	0
	A	A	A	A	A	A	A	A	A	A	A	A	A	A	A	A	G	A	A	A	A	A	A	A	A	A	A	A	G	A	A	A	A	A	A	A	A	A	A	A	A	A	A	A	A	A	A	A	0
PZE-101036991	T	T	T	T	C	C	T	C	T	C	T	C	T	T	T	T	C	T	T	C	T	T	0	0	T	C	T	T	0	T	C	C	0	C	C	T	T	C	C	C	C	C	T	C	C	T	C	C	C
	T	T	T	T	C	C	T	C	T	C	T	C	T	T	T	T	C	T	T	C	T	T	0	0	T	C	T	T	0	T	C	C	0	C	C	T	T	C	C	C	C	C	T	C	C	T	C	C	C
PZE-101037142	T	G	G	T	G	G	T	G	G	G	0	G	G	G	G	G	G	G	G	G	T	G	G	G	G	G	G	G	G	G	G	G	G	G	G	G	G	G	G	G	G	G	G	G	G	G	G	G	G
	T	G	G	T	G	G	T	G	G	G	0	G	G	G	G	G	G	G	G	G	T	G	G	G	G	G	G	G	G	G	G	G	G	G	G	G	G	G	G	G	G	G	G	G	G	G	G	G	G
PZE-101037191	G	G	G	G	G	A	G	G	G	G	G	G	G	G	G	G	G	A	G	A	G	G	G	G	G	G	G	G	G	G	G	G	G	G	G	G	G	G	G	A	G	G	G	G	G	A	G	G	G
	G	G	G	G	G	A	G	G	G	G	G	G	G	G	G	G	G	A	G	A	G	G	G	G	G	G	G	G	G	G	G	G	G	G	G	G	G	G	G	A	G	G	G	G	G	A	G	G	G
PZE-101037211	G	A	G	G	G	A	G	G	A	G	G	A	G	A	G	A	A	A	G	A	G	G	A	A	G	A	A	A	G	G	A	G	G	A	G	A	G	A	A	G	A	A	G	A	A	A	A	A	G
	G	A	G	G	G	A	G	G	A	G	G	A	G	A	G	A	A	A	G	A	G	G	A	A	G	A	A	A	G	G	A	G	G	A	G	A	G	A	A	G	A	A	G	A	A	A	A	A	G
PZE-101037244	A	A	A	A	A	G	A	G	A	A	A	G	A	A	A	G	A	G	A	G	A	A	A	G	G	G	A	A	G	A	A	A	A	A	0	G	A	A	G	G	G	A	A	G	0	A	A	0	A
	A	A	A	A	A	G	A	G	A	A	A	G	A	A	A	G	A	G	A	G	A	A	A	G	G	G	A	A	G	A	A	A	A	A	0	G	A	A	G	G	G	A	A	G	0	A	A	0	G
PZE-101037265	T	T	0	T	C	T	T	0	T	C	0	C	C	C	T	C	C	T	0	T	0	0	T	C	0	0	C	T	C	C	0	C	C	0	C	C	0	C	C	C	C	C	0	C	C	C	T	C	C
	T	T	0	T	C	T	T	0	T	C	0	C	C	C	T	C	C	T	0	T	0	0	T	C	0	0	C	T	C	C	0	C	C	0	C	C	0	C	C	C	C	C	0	C	C	C	T	C	C
PZE-101037602	G	A	A	A	A	A	G	G	A	A	A	A	A	A	A	G	A	A	A	A	A	A	A	A	A	A	A	A	A	A	A	A	G	G	A	A	A	A	G	G	A	A	A	A	A	A	A	A	A
	G	A	A	A	A	A	G	G	A	A	A	A	A	A	A	G	A	A	A	A	A	A	A	A	A	A	A	A	A	A	A	A	G	G	A	A	A	A	G	G	A	A	A	A	A	A	A	A	A
PZE-101037751	G	G	G	G	G	G	G	G	G	G	G	G	C	G	G	G	C	C	G	C	C	G	C	C	C	C	G	C	G	C	C	C	G	C	C	G	G	G	G	C	C	G	C	G	C	G	C	C	G
	G	G	G	G	G	G	G	G	G	G	G	G	C	G	G	G	C	C	G	C	C	G	C	C	C	C	G	C	G	C	C	C	G	C	C	G	G	G	G	C	C	G	C	G	C	G	C	C	G
PZE-101037854	G	G	G	G	G	G	G	G	G	G	G	G	G	G	G	T	T	T	G	T	T	G	T	T	T	T	0	T	G	T	T	T	G	T	T	G	G	G	T	T	T	G	T	G	T	G	T	T	G
	G	G	G	G	G	G	G	G	G	G	G	G	G	G	G	T	T	T	G	T	T	G	T	T	T	T	0	T	G	T	T	T	G	T	T	G	G	G	T	T	T	G	T	G	T	G	T	T	G
PZE-101038026	A	A	A	A	A	A	C	A	A	A	0	A	A	A	C	C	A	A	A	A	C	A	C	C	A	A	A	A	C	A	A	A	A	C	A	A	A	A	C	A	A	A	A	A	C	A	C	C	C
	A	A	A	A	A	A	C	A	A	A	0	A	A	A	C	C	A	A	A	A	C	A	C	C	A	A	A	A	C	A	A	A	A	C	A	A	A	A	C	A	A	A	A	A	C	A	C	C	C
PZE-101038058	A	A	A	A	A	A	A	A	A	A	A	A	A	G	A	A	G	A	A	A	A	A	G	G	G	G	A	A	A	A	G	A	G	A	A	G	A	G	G	G	G	G	A	A	A	G	A	A	G
	A	A	A	A	A	A	A	A	A	A	A	A	A	G	A	A	G	A	A	A	A	A	G	G	G	G	A	A	A	A	G	A	G	A	A	G	A	G	G	G	G	G	A	A	A	G	A	A	G
PZE-101038176	G	T	G	G	G	G	T	G	G	G	T	G	T	T	G	0	0	T	T	T	T	T	G	G	T	0	G	T	T	G	T	T	T	0	T	T	T	G	T	T	0	T	G	G	T	T	G	T	G
	G	T	G	G	G	G	T	G	G	G	T	G	T	T	G	0	0	T	T	T	T	T	G	G	T	0	G	T	T	G	T	T	T	0	T	T	T	G	T	T	0	T	G	G	T	T	G	T	G
PZE-101038222	C	C	C	C	C	C	C	C	C	C	C	C	C	C	C	C	C	C	C	T	C	C	C	C	C	C	C	C	C	C	C	C	T	C	C	C	C	C	C	C	C	C	C	C	C	C	C	C	C
	C	C	C	C	C	C	C	C	C	C	C	C	C	C	C	C	C	C	C	T	C	C	C	C	C	C	C	C	C	C	C	C	T	C	C	C	C	C	C	C	C	C	C	C	C	C	C	C	C
PZE-101038250	T	T	T	T	T	T	T	T	T	T	T	T	T	T	T	T	G	T	T	T	G	T	T	0	G	G	T	T	G	T	T	G	T	T	T	T	T	T	T	T	G	G	T	T	T	G	T	T	G
	T	T	T	T	T	T	T	T	T	T	T	T	T	T	T	T	G	T	T	T	G	T	T	0	G	G	T	T	G	T	T	G	T	T	T	T	T	T	T	T	G	G	T	T	T	G	T	T	G
PZE-101038253	C	C	C	C	C	C	C	C	C	C	C	C	C	C	C	C	C	C	C	T	C	C	C	C	C	C	C	C	C	C	C	C	T	C	C	C	C	T	C	T	C	C	C	C	C	C	C	C	C
	C	C	C	C	C	C	C	C	C	C	C	C	C	C	C	C	C	C	C	T	C	C	C	C	C	C	C	C	C	C	C	C	T	C	C	C	C	T	C	T	C	C	C	C	C	C	C	C	C
PZE-101038258	A	A	A	A	A	A	A	A	A	A	A	A	A	A	A	A	G	A	A	G	G	A	A	G	A	G	A	A	G	A	A	G	G	A	A	A	A	G	A	G	G	G	A	A	A	G	A	A	G
	A	A	A	A	A	A	A	A	A	A	A	A	A	A	A	A	G	A	A	G	G	A	A	G	A	G	A	A	G	A	A	G	G	A	A	A	A	G	A	G	G	G	A	A	A	G	A	A	G
PZE-101038268	C	C	C	C	C	C	C	C	C	C	C	C	C	C	C	C	C	C	C	C	T	C	T	0	T	C	C	C	T	C	C	T	T	T	C	C	C	T	C	T	T	T	C	C	C	T	C	C	C
	C	C	C	C	C	C	C	C	C	C	C	C	C	C	C	C	C	C	C	C	T	C	T	0	T	C	C	C	T	C	C	T	T	C	C	C	C	T	C	T	T	T	C	C	C	T	C	C	C
PZE-101038315	G	A	A	G	G	A	A	G	G	G	G	G	G	G	G	G	A	G	A	G	G	G	G	A	G	A	G	G	A	A	A	G	G	A	A	G	G	G	G	G	G	G	G	G	A	A	A	A	A
	G	A	A	G	G	A	A	G	G	G	G	G	G	G	G	G	A	G	A	G	G	G	G	A	G	A	G	G	A	A	A	G	G	G	A	G	G	G	G	G	G	G	G	G	A	A	A	A	A
PZE-101038501	T	T	T	T	T	T	T	T	T	T	T	T	T	T	T	T	T	T	T	T	T	T	T	T	T	T	T	T	T	T	G	T	T	T	G	T	T	T	T	T	T	T	T	T	G	T	T	G	T
	T	T	T	T	T	T	T	T	T	T	T	T	T	T	T	T	T	T	T	T	T	T	T	T	T	T	T	T	T	T	G	T	T	T	G	T	T	T	T	T	T	T	T	T	G	T	T	G	T
PZE-101038503	T	T	T	C	T	T	T	T	T	T	T	T	C	T	T	T	T	T	T	T	T	T	T	C	T	T	T	T	C	C	C	T	T	T	C	T	C	T	T	C	T	T	T	T	C	T	T	C	T
	T	T	T	C	T	T	T	T	T	T	T	T	C	T	T	T	T	T	T	T	T	T	T	C	T	T	T	T	C	C	C	T	T	T	C	T	C	T	T	C	T	T	T	T	C	T	T	C	T
PZE-101038522	T	T	T	G	T	T	T	T	T	T	T	T	G	T	T	T	T	T	0	T	T	T	T	G	T	T	T	T	G	0	0	T	T	T	0	T	G	T	T	G	T	T	0	T	0	T	0	0	T
	T	T	T	G	T	T	G	T	T	T	T	T	G	T	T	T	T	T	0	T	T	T	T	G	T	T	T	T	G	0	0	T	T	T	0	T	G	T	T	G	T	T	0	T	0	T	0	0	T
PZE-101038492	C	G	G	C	G	G	G	C	0	G	0	G	C	C	C	C	C	C	G	C	C	G	0	C	G	C	0	G	C	G	C	G	G	C	C	C	C	G	C	C	C	C	C	G	C	G	G	C	G
	C	G	G	C	G	G	G	C	0	G	0	G	C	C	C	C	C	C	G	C	C	G	0	C	G	C	0	G	C	G	C	G	G	G	C	C	C	G	C	C	C	C	C	G	C	G	G	C	G
PZE-101038611	G	G	G	G	G	G	G	T	0	G	G	G	G	G	T	T	T	G	G	G	T	G	G	G	G	T	G	G	G	G	G	T	G	G	G	G	G	G	T	G	G	G	T	G	G	G	G	G	G
	G	G	G	G	G	G	G	T	0	G	G	G	G	G	T	T	T	G	G	G	T	G	G	G	G	T	G	G	G	G	G	T	G	G	G	G	G	G	T	G	G	G	T	G	G	G	G	G	G
PZE-101038678	G	G	A	G	G	G	G	G	G	G	A	G	G	A	G	G	G	G	A	A	G	A	G	G	G	G	G	G	A	A	A	0	G	A	A	A	G	G	G	G	G	G	G	A	A	G	G	A	G
	G	G	A	G	G	G	G	G	G	G	A	G	G	A	G	G	G	G	A	A	G	A	G	G	G	G	G	G	A	A	A	0	G	G	A	A	G	G	G	G	G	G	G	A	A	G	G	A	G
PZE-101038943	C	T	T	C	T	T	T	C	T	C	T	C	T	T	T	T	T	T	T	T	T	T	T	T	T	T	T	C	C	C	T	T	T	C	T	C	C	T	T	C	C	T	T	T	T	C	T	T	C
	C	T	T	C	T	T	T	C	T	C	T	C	T	T	T	T	T	T	T	T	T	T	T	T	T	T	T	C	C	C	T	T	T	C	T	C	C	T	T	C	C	T	T	T	T	C	T	T	C
PZE-101038989	T	C	C	T	C	C	C	T	C	T	C	T	C	C	C	C	C	C	C	C	C	C	C	C	C	C	C	T	T	T	C	C	C	T	C	T	T	C	T	T	T	C	C	C	C	T	C	C	T
	T	C	C	T	C	C	C	T	C	T	C	T	C	C	C	C	C	C	C	C	C	C	C	C	C	C	C	T	T	T	C	C	C	C	C	T	T	C	T	T	T	C	C	C	C	T	C	C	T
PZE-101039024	G	G	G	A	G	G	A	G	A	A	G	G	A	G	G	G	G	A	A	A	G	G	A	G	G	A	A	A	G	G	G	G	G	G	A	G	G	A	A	G	G	A	G	G	G	G	G	G	G
	G	G	G	A	G	G	A	G	A	A	G	G	A	G	G	G	G	A	A	A	G	G	A	G	G	A	A	A	G	G	G	G	G	G	A	G	G	A	A	G	G	A	G	G	G	G	G	G	G
PZE-101039198	A	A	A	A	C	C	A	A	A	A	A	A	A	C	C	A	C	A	A	A	C	A	A	A	A	A	A	A	A	A	A	A	A	A	A	A	A	A	A	A	A	A	A	A	A	A	C	A	A
	A	A	A	A	C	C	A	A	A	A	A	A	A	C	C	A	C	A	A	A	C	A	A	A	A	A	A	A	A	A	A	A	A	A	A	A	A	A	A	A	A	A	A	A	A	A	C	A	A
PZE-101039199	C	A	C	C	C	C	A	C	C	C	0	C	A	C	C	C	C	C	A	C	C	C	A	C	C	A	C	C	C	C	C	C	A	A	C	A	C	A	C	C	C	A	A	C	A	C	C	A	C
	C	A	C	C	C	C	A	C	C	C	0	C	A	C	C	C	C	C	A	C	C	C	A	C	C	A	C	C	C	C	C	C	A	C	C	A	C	A	C	C	C	A	A	C	A	C	C	A	C
PZE-101039207	G	G	A	A	G	G	G	G	A	A	G	G	G	G	G	G	G	G	G	G	G	A	G	0	A	G	A	A	A	A	A	A	G	G	G	G	A	G	A	A	A	G	G	G	G	G	G	G	A
	G	G	A	A	G	G	G	G	A	A	G	G	G	G	G	G	G	G	G	G	G	A	G	0	A	G	A	A	A	A	A	A	G	G	G	G	A	G	A	A	A	G	G	G	G	G	G	G	A
PZE-101039301	A	G	G	G	G	G	A	A	G	G	0	A	G	G	G	G	G	A	G	A	G	A	A	0	A	G	A	G	A	A	A	G	G	A	A	A	G	G	G	A	G	G	G	G	G	G	G	G	G
	A	G	G	G	G	G	A	A	G	G	0	A	G	G	G	G	G	A	G	A	G	A	A	0	A	G	A	G	A	A	A	G	G	G	A	A	G	G	G	A	G	G	G	G	G	G	G	G	G
PZE-101039351	G	G	G	G	G	G	G	G	G	G	G	G	G	G	A	A	G	G	G	A	G	G	A	G	A	A	G	G	A	G	G	G	G	A	G	G	A	G	A	G	G	G	G	A	G	G	A	G	G
	G	G	G	G	G	G	G	G	G	G	G	G	G	G	A	A	G	G	G	A	G	G	A	G	A	A	G	G	A	G	G	G	G	A	G	G	A	G	A	G	G	G	G	A	G	G	A	G	G
PZE-101039371	C	T	C	T	C	T	C	C	T	C	0	C	C	T	T	C	C	C	C	C	T	C	C	C	C	C	C	T	C	T	C	C	C	C	C	C	T	C	C	C	T	C	C	C	C	T	C	C	T
	C	T	C	T	C	T	C	C	T	C	0	C	C	T	T	C	C	C	C	C	T	C	C	C	C	C	C	T	C	T	C	C	C	C	C	C	T	C	C	C	T	C	C	C	C	T	C	C	T
PZE-101039400	T	T	G	T	T	T	T	T	G	T	T	T	T	T	T	T	T	T	T	T	T	T	G	0	T	T	T	T	G	T	T	T	T	T	T	T	G	T	T	G	T	T	G	T	T	T	T	T	T
	T	T	G	T	T	T	T	T	G	T	T	T	T	T	T	T	T	T	T	T	T	T	G	0	T	T	T	T	G	T	T	T	T	T	T	T	G	T	T	G	T	T	G	T	T	T	T	T	T
PZE-101039409	A	0	A	A	G	A	A	A	A	A	A	A	G	A	A	A	A	A	G	G	G	A	A	A	0	A	A	G	A	A	A	A	A	A	G	A	A	A	0	A	G	G	A	A	G	0	A	A	G
	A	0	A	A	G	A	A	A	A	A	A	A	G	A	A	G	A	A	G	G	G	A	A	A	0	A	G	G	A	A	A	A	A	A	G	A	A	A	0	A	G	G	A	A	G	0	A	A	G
PZE-101039440	G	A	G	G	A	G	G	G	G	G	G	G	A	G	G	A	G	G	A	A	A	G	G	G	A	G	A	A	G	G	G	G	G	G	A	G	G	G	A	G	A	A	G	G	A	A	G	G	A
	G	A	G	G	A	G	G	G	G	G	G	G	A	G	G	A	G	G	A	A	A	G	G	G	A	G	A	A	G	G	G	G	G	G	A	G	G	G	A	G	A	A	G	G	A	A	G	G	A
PZE-101039466	C	C	C	C	C	C	C	C	C	C	C	C	C	C	C	C	C	C	C	C	C	T	C	C	C	C	C	C	C	C	T	T	T	0	C	T	C	T	C	C	C	C	C	T	C	C	T	T	C
	C	C	C	C	C	C	C	C	C	C	C	C	C	C	C	C	C	C	C	C	C	T	C	C	C	C	C	C	C	C	T	T	T	0	C	T	C	T	C	C	C	C	C	T	C	C	T	T	C
PZE-101039469	G	G	G	G	G	G	G	G	G	G	0	G	G	G	G	G	G	G	G	G	G	A	G	G	G	G	G	G	G	G	A	A	A	A	G	A	G	A	G	G	G	G	G	A	G	G	A	A	G
	G	G	G	G	G	G	G	G	G	G	0	G	G	G	G	G	G	G	G	G	G	A	G	G	G	G	G	G	G	G	A	A	A	G	G	A	G	A	G	G	G	G	G	A	G	G	A	A	G
PZE-101039624	A	G	A	G	A	G	A	A	G	G	0	A	G	G	A	G	A	A	A	A	A	A	A	A	A	A	G	A	A	A	A	G	A	A	A	A	G	A	A	A	A	A	G	A	A	A	A	A	A
	A	G	A	G	A	G	A	A	G	G	0	A	G	G	A	G	A	A	A	A	A	A	A	A	A	A	G	A	A	A	A	G	A	A	A	A	G	A	A	A	A	A	G	A	A	A	A	A	A
PZE-101039642	G	G	G	A	G	A	G	G	A	A	0	G	A	A	0	A	G	G	G	G	G	G	G	G	G	G	A	G	G	G	G	0	G	G	G	G	A	G	G	G	G	G	A	G	G	G	G	G	G
	G	G	G	A	G	A	G	G	A	A	0	G	A	A	0	A	G	G	G	G	G	G	G	G	G	G	A	G	G	G	G	0	G	G	G	G	A	G	G	G	G	G	A	G	G	G	G	G	G
PZE-101039648	T	T	T	C	T	C	T	T	C	C	C	T	C	C	T	C	T	T	T	T	T	T	T	T	T	T	T	T	T	T	T	C	T	T	T	T	C	T	T	T	T	T	C	T	T	T	T	T	T
	T	T	T	C	T	C	T	T	C	C	C	T	C	C	T	C	T	T	T	T	T	T	T	T	T	T	T	T	T	T	T	C	T	T	T	T	C	T	T	T	T	T	C	T	T	T	T	T	T
PZE-101039655	C	C	C	T	C	T	C	C	T	T	T	C	T	T	T	T	C	C	T	C	C	C	C	C	C	C	C	C	C	C	C	T	C	C	T	C	T	C	C	C	C	C	C	C	C	C	C	C	T
	C	C	C	T	C	T	C	C	T	T	T	C	T	T	T	T	C	C	T	C	C	C	C	C	C	C	C	C	C	C	C	T	C	C	T	C	T	C	C	C	C	C	C	C	C	C	C	C	T
PZE-101039769	T	T	T	T	T	T	T	T	T	T	T	C	T	T	T	T	T	T	T	T	C	T	T	T	T	T	0	T	T	T	T	T	T	T	0	T	T	T	T	T	T	T	T	T	T	T	T	C	T
	T	T	T	T	T	T	T	T	T	T	T	C	T	T	T	T	T	T	T	T	C	T	T	T	T	T	0	T	T	T	T	T	T	T	0	T	T	T	T	T	T	T	T	T	T	T	T	C	T
PZE-101039839	0	T	0	T	0	T	T	0	0	0	T	0	T	T	T	T	T	T	T	T	T	T	A	T	T	T	T	A	T	T	T	T	T	T	T	T	T	T	T	A	T	T	T	T	T	T	T	T	T
	0	T	0	T	0	T	T	0	0	0	T	0	T	T	T	T	T	T	T	T	T	T	A	T	T	T	T	A	T	T	T	T	T	T	T	T	T	T	T	A	T	T	T	T	T	T	T	T	T
PZE-101040594	A	G	G	G	G	G	A	G	G	G	G	G	G	G	A	G	A	A	G	A	G	G	G	G	G	G	A	A	G	G	G	G	G	A	G	A	G	G	G	G	A	G	G	G	G	G	G	A	G
	A	G	G	G	G	G	A	G	G	G	G	G	G	G	A	G	A	A	G	A	G	G	G	G	G	G	A	A	G	G	G	G	G	G	G	A	G	G	G	G	A	G	G	G	G	G	G	A	G
PZE-101040601	G	G	G	G	G	G	A	G	G	G	G	G	G	G	G	G	G	G	G	G	G	G	G	G	A	A	G	A	G	G	G	G	A	A	A	G	G	G	G	G	A	G	G	G	G	G	A	G	G
	G	G	G	G	G	G	A	G	G	G	G	G	G	G	G	G	G	G	G	G	G	G	G	G	A	A	G	A	G	G	G	G	A	A	A	G	G	G	G	G	A	G	G	G	G	G	A	G	G
PZE-101040607	C	A	C	A	C	A	C	C	A	A	C	C	C	A	C	C	C	C	C	C	A	C	A	A	C	C	C	C	A	A	C	A	C	C	C	C	A	A	A	C	C	C	A	C	C	A	C	C	A
	C	A	C	A	C	A	C	C	A	A	C	C	C	A	C	C	C	C	C	C	A	C	A	A	C	C	C	C	A	A	C	A	C	C	C	C	A	A	A	C	C	C	A	C	C	A	C	C	A
PZE-101040619	G	A	G	A	G	A	G	G	A	A	G	G	G	A	G	G	G	G	G	G	A	G	A	A	G	G	G	G	A	A	G	A	G	G	G	G	A	A	A	G	G	G	A	G	G	A	G	G	A
	G	A	G	A	G	A	G	G	A	A	G	G	G	A	G	G	G	G	G	G	A	G	A	A	G	G	G	G	A	A	G	A	G	G	G	G	A	A	A	G	G	G	A	G	G	A	G	G	A
PZE-101040641	G	G	G	G	G	G	T	G	G	G	G	G	G	G	G	G	G	G	G	G	G	G	G	G	T	T	G	T	G	G	G	G	T	T	T	G	G	G	G	G	T	G	G	G	G	G	T	G	G
	G	G	G	G	G	G	T	G	G	G	G	G	G	G	G	G	G	G	G	G	G	G	G	G	T	T	G	T	G	G	G	G	T	T	T	G	G	G	G	G	T	G	G	G	G	G	T	G	G
PZE-101040677	G	G	A	G	A	G	A	G	G	G	G	G	A	G	G	A	G	G	A	G	G	A	G	G	A	A	G	A	G	G	A	G	A	A	A	G	G	G	G	A	A	A	G	A	A	G	A	G	G
	G	G	A	G	A	G	A	G	G	G	G	G	A	G	G	A	G	G	A	G	G	A	G	G	A	A	G	A	G	G	A	G	A	A	A	G	G	G	G	A	A	A	G	A	A	G	A	G	G
PZE-101040783	A	A	A	A	A	A	G	A	A	A	A	A	G	A	A	A	A	A	A	A	A	A	A	A	A	G	G	G	A	A	A	A	A	A	A	A	A	A	A	A	G	A	A	G	A	A	G	G	A
	A	A	A	A	A	A	G	A	A	A	A	A	G	A	A	A	A	A	A	A	A	A	A	A	A	G	G	G	A	A	A	A	A	A	A	A	A	A	A	A	G	A	A	G	A	A	G	G	A
PZE-101040838	A	A	G	A	G	A	G	G	A	A	A	G	G	A	G	G	A	A	G	A	A	A	A	G	G	G	G	G	A	A	A	G	A	G	A	G	A	A	A	G	G	A	A	G	A	A	G	G	A
	A	A	G	A	G	A	G	G	A	A	A	G	G	A	G	G	A	A	G	A	A	A	A	G	G	G	G	G	A	A	A	G	A	G	A	G	A	A	A	G	G	A	A	G	A	A	G	G	A
PZE-101040895	T	T	T	T	T	T	T	T	0	T	T	C	T	T	C	C	T	T	T	T	T	T	0	0	C	C	0	T	T	C	T	C	C	T	T	T	T	T	T	C	T	C	T	T	T	C	T	T	T
	T	T	T	T	T	T	T	T	0	T	T	C	T	T	C	C	T	T	T	T	T	T	0	0	C	C	0	T	T	C	T	C	C	T	T	T	T	T	T	C	T	C	T	T	T	C	T	T	T
PZE-101041070	T	T	T	C	C	T	T	C	T	T	T	T	T	T	T	T	C	C	T	T	T	T	T	0	T	C	T	T	T	T	C	T	T	T	T	T	T	T	C	C	T	C	T	T	C	T	T	T	C
	T	T	T	C	C	T	T	C	T	T	T	T	T	T	T	T	C	C	T	T	T	T	T	0	T	C	T	T	T	T	C	T	T	T	T	T	T	T	C	C	T	C	T	T	C	T	T	T	C
PZE-101041088	T	T	G	G	G	T	G	G	T	G	0	T	G	G	T	T	G	G	G	G	T	G	G	T	G	G	G	G	G	G	G	T	G	G	G	G	T	G	G	G	G	G	T	G	G	G	G	G	G
	T	T	G	G	G	T	G	G	T	G	0	T	G	G	T	T	G	G	G	G	T	G	G	T	G	G	G	G	G	G	G	T	G	G	G	G	T	G	G	G	G	G	T	G	G	G	G	G	G
PZE-101041178	C	T	C	C	C	T	T	C	T	T	T	T	C	T	T	T	T	C	C	C	T	T	C	C	T	C	T	C	T	T	C	C	T	C	C	T	T	T	C	T	C	C	T	C	T	T	C	C	C
	C	T	C	C	C	T	T	C	T	T	T	T	C	T	T	T	T	C	C	C	T	T	C	C	T	C	T	C	T	T	C	C	T	C	C	T	T	T	C	T	C	C	T	C	T	T	C	C	C
PZE-101041380	T	T	T	C	C	T	T	T	T	T	T	T	C	T	T	T	T	T	T	T	T	T	C	T	T	T	C	T	C	C	C	T	C	T	C	T	T	T	T	T	T	C	T	T	T	C	T	T	T
	T	T	T	C	C	T	T	T	T	T	T	T	C	T	T	T	T	T	T	T	T	T	C	T	T	T	C	T	C	C	C	T	C	T	C	T	T	T	T	T	T	C	T	T	T	C	T	T	T
PZE-101041588	C	T	T	C	C	T	C	C	C	C	T	C	T	C	C	C	C	T	T	T	T	T	C	C	C	T	C	C	C	T	T	C	T	T	C	T	T	C	C	C	C	T	C	C	T	T	T	T	C
	C	T	T	C	C	T	C	C	C	C	T	C	T	C	C	C	C	T	T	T	T	T	C	C	C	T	C	C	C	T	T	C	T	T	C	T	T	C	C	C	C	T	C	C	T	T	T	T	C
PZE-101041602	T	G	G	T	G	G	G	T	G	G	G	G	G	G	T	T	G	G	G	G	G	G	G	G	G	G	G	G	G	G	G	G	G	G	G	G	G	G	G	G	G	G	G	G	G	G	G	G	T
	T	G	G	T	G	G	G	T	G	G	G	G	G	G	T	T	G	G	G	G	G	G	G	G	G	G	G	G	G	G	G	G	G	G	G	G	G	G	G	G	G	G	G	G	G	G	G	G	T
PZE-101041837	G	G	A	A	G	A	G	G	A	G	A	G	G	G	G	G	G	G	A	G	A	A	G	G	G	G	A	A	A	A	G	G	A	A	A	A	G	G	G	A	G	G	A	A	G	A	G	A	G
	G	G	A	A	G	A	G	G	A	G	A	G	G	G	G	G	G	G	A	G	A	A	G	G	G	G	A	A	A	A	G	G	A	A	A	A	G	G	G	A	G	G	A	A	G	A	G	A	G
PZE-101041854	C	C	T	T	C	T	C	C	T	C	T	C	C	C	C	C	C	C	T	C	T	T	C	C	T	C	T	T	T	T	C	C	T	T	T	T	C	C	C	T	C	C	T	T	T	T	C	T	C
	C	C	T	T	C	T	C	C	T	C	T	C	C	C	C	C	C	C	T	C	T	T	C	C	T	C	T	T	T	T	C	C	T	T	T	T	C	C	C	T	C	C	T	T	T	T	C	T	C
PZE-101041995	C	T	T	T	C	C	T	C	T	T	0	C	C	T	C	T	T	T	T	T	T	C	T	T	T	T	T	T	T	T	T	T	T	T	T	T	T	T	T	T	C	C	C	T	T	T	C	T	T
	C	T	T	T	C	C	T	C	T	T	0	C	C	T	C	T	T	T	T	T	T	C	T	T	T	T	T	T	T	T	T	T	T	T	T	T	T	T	T	T	C	C	C	T	T	T	C	T	T
PZE-101042009	A	A	A	A	A	A	A	A	A	A	G	A	A	A	A	A	A	G	A	G	A	A	A	A	G	G	A	G	G	G	G	A	G	A	A	A	A	A	A	G	A	A	A	A	G	G	A	G	A
	A	A	A	A	A	A	A	A	A	A	G	A	A	A	A	A	A	G	A	G	A	A	A	A	G	G	A	G	G	G	G	A	G	A	A	A	A	A	A	G	A	A	A	A	G	G	A	G	A
PZE-101042039	G	G	T	T	G	G	G	G	G	G	G	G	G	G	G	G	G	G	T	T	T	G	G	G	G	G	T	G	G	G	T	G	T	G	G	G	G	G	G	G	G	G	G	G	G	G	G	G	G
	G	G	T	T	G	G	G	G	G	G	G	G	G	G	G	G	G	G	T	T	T	G	G	G	G	G	T	G	G	G	T	G	T	G	G	G	G	G	G	G	G	G	G	G	G	G	G	G	G
PZE-101042040	G	A	G	G	A	A	A	G	A	A	A	G	A	A	A	A	A	A	G	G	G	A	A	A	A	A	G	A	A	A	G	A	G	A	A	A	A	A	A	A	A	A	G	A	G	A	A	A	A
	G	A	G	G	A	A	A	G	A	A	A	G	A	A	A	A	A	A	G	G	G	A	A	A	A	A	G	A	A	A	G	A	G	A	A	A	A	A	A	A	A	A	G	A	G	A	A	A	A
PZE-101042041	C	T	T	T	T	T	T	C	T	T	T	C	T	C	C	T	T	T	T	T	T	T	C	T	T	T	T	T	T	T	T	T	T	T	T	T	T	C	C	T	T	T	C	T	C	T	T	C	T
	C	T	T	T	T	T	T	C	T	T	T	C	T	C	C	T	T	T	T	T	T	T	C	T	T	T	T	T	T	T	T	T	T	T	T	T	T	C	C	T	T	T	C	T	C	T	T	C	T
PZE-101042060	A	C	C	A	C	A	A	A	C	C	A	A	A	C	C	C	A	C	C	A	C	C	C	C	C	A	C	C	C	C	C	C	C	A	A	C	A	C	A	A	C	C	A	C	C	C	A	A	A
	A	C	C	A	C	A	A	A	C	C	A	A	A	C	C	C	A	C	C	A	C	C	C	C	C	A	C	C	C	C	C	C	C	A	A	C	A	C	A	A	C	C	A	C	C	C	A	A	A
PZE-101042156	A	A	A	A	G	A	G	A	G	G	0	A	A	G	A	A	G	A	A	A	A	A	G	0	G	G	0	A	A	0	A	A	G	G	G	G	G	A	G	A	A	G	A	G	A	0	A	G	G
	A	A	A	A	G	A	G	A	G	G	0	A	A	G	A	A	G	A	A	A	A	A	G	0	G	G	0	A	A	0	A	A	G	G	G	G	G	A	G	A	A	G	A	G	A	0	A	G	G
PZE-101042195	C	T	C	C	T	C	T	C	T	T	T	C	C	T	C	C	T	C	C	C	C	C	T	C	T	T	C	C	C	C	C	C	T	T	T	T	T	C	T	C	C	T	C	T	C	C	C	T	T
	C	T	C	C	T	C	T	C	T	T	T	C	C	T	C	C	T	C	C	C	C	C	T	C	T	T	C	C	C	C	C	C	T	T	T	T	T	C	T	C	C	T	C	T	C	C	C	T	T
PZE-101042196	C	C	T	T	C	T	C	C	C	C	C	C	T	C	C	T	C	T	T	T	T	T	C	T	C	C	T	T	T	T	T	T	C	C	C	C	C	T	C	T	T	C	C	C	T	T	T	C	C
	C	C	T	T	C	T	C	C	C	C	C	C	T	C	C	T	C	T	T	T	T	T	C	T	C	C	T	T	T	T	T	T	C	C	C	C	C	T	C	T	T	C	C	C	T	T	T	C	C
PZE-101042212	A	A	A	A	A	A	A	A	A	A	A	A	A	A	A	A	A	G	A	A	A	A	A	G	A	A	A	G	A	G	A	G	A	A	A	A	A	A	A	A	G	A	A	A	G	G	A	A	A
	A	A	A	A	A	A	A	A	A	A	A	A	A	A	A	A	A	G	A	A	A	A	A	G	A	A	A	G	A	G	A	G	A	A	A	A	A	A	A	A	G	A	A	A	G	G	A	A	A
PZE-101042341	G	G	A	G	G	G	G	G	G	G	0	G	G	G	G	G	G	G	A	G	G	G	G	G	G	G	A	G	G	A	G	G	G	G	G	G	G	G	G	A	G	G	G	G	G	A	G	G	G
	G	G	A	G	G	G	G	G	G	G	0	G	G	G	G	G	G	G	A	G	G	G	G	G	G	G	A	G	G	A	G	G	G	G	G	G	G	G	G	A	G	G	G	G	G	A	G	G	G
PZE-101042424	A	A	G	A	A	A	A	A	G	A	G	A	A	A	A	A	A	G	G	G	A	G	A	A	A	A	G	G	G	A	A	A	A	A	A	G	A	A	A	A	G	G	A	G	G	A	A	A	A
	A	A	G	A	A	A	A	A	G	A	G	A	A	A	A	A	A	G	G	G	A	G	A	A	A	A	G	G	G	A	A	A	A	A	A	G	A	A	A	A	G	G	A	G	G	A	A	A	A
PZE-101043094	G	G	A	A	A	G	G	G	G	G	A	G	A	G	G	G	G	A	A	G	A	G	A	G	G	A	G	A	G	G	A	A	G	A	A	A	G	G	A	A	A	G	G	A	A	G	G	G	G
	G	G	A	A	A	G	G	G	G	G	A	G	A	G	G	G	G	A	A	G	A	G	A	G	G	A	G	A	G	G	A	A	G	A	A	A	G	G	A	A	A	G	G	A	A	G	G	G	G
PZE-101043096	C	C	C	C	C	T	T	C	T	C	C	C	C	T	T	T	T	C	C	T	C	T	C	C	T	C	C	C	T	T	C	C	T	C	C	C	T	T	C	C	C	C	C	C	C	T	C	T	C
	C	C	C	C	C	T	T	C	T	C	C	C	C	T	T	T	T	C	C	T	C	T	C	C	T	C	C	C	T	T	C	C	T	C	C	C	T	T	C	C	C	C	C	C	C	T	C	T	C
PZE-101043180	G	T	T	T	T	G	G	G	G	G	G	G	G	G	G	G	G	G	T	G	T	G	G	T	G	G	T	G	G	G	G	G	G	G	T	G	G	G	G	G	G	G	T	T	G	G	G	G	T
	G	T	T	T	T	G	G	G	G	G	G	G	G	G	G	G	G	G	T	G	T	G	G	T	G	G	T	G	G	G	G	G	G	G	T	G	G	G	G	G	G	G	T	T	G	G	G	G	T
PZE-101043186	G	G	G	G	G	T	T	G	0	G	T	G	T	G	T	T	T	T	G	T	G	T	T	T	T	T	G	T	T	T	G	G	T	T	G	T	T	T	T	T	T	T	G	G	T	T	T	T	T
	G	G	G	G	G	T	T	G	0	G	T	G	T	G	T	T	T	T	G	T	G	T	T	T	T	T	G	T	T	T	G	G	T	T	G	T	T	T	T	T	T	T	G	G	T	T	T	T	T
PZE-101043189	A	G	A	A	A	G	G	A	G	A	G	A	G	A	G	G	G	G	A	G	A	G	G	G	G	G	A	G	G	G	G	A	G	G	A	G	G	G	G	G	G	G	G	A	G	G	A	G	G
	A	G	A	A	A	G	G	A	G	A	G	A	G	A	G	G	G	G	A	G	A	G	G	G	G	G	A	G	G	G	G	A	G	G	A	G	G	G	G	G	G	G	G	A	G	G	A	G	G
PZE-101043507	C	T	C	C	C	T	T	C	C	T	0	C	C	C	T	C	C	C	C	C	T	C	C	C	C	C	T	T	C	C	T	C	C	T	C	C	C	T	C	C	C	C	C	T	C	C	T	T	C
	C	T	C	C	C	T	T	C	C	T	0	C	C	C	T	C	C	C	C	C	T	C	C	C	C	C	T	T	C	C	T	C	C	T	C	C	C	T	C	C	C	C	C	T	C	C	T	T	C
PZE-101043512	C	C	C	C	C	C	C	C	C	C	0	C	C	C	C	C	C	C	C	C	C	C	C	A	C	C	C	C	C	C	C	C	C	C	C	C	C	C	C	C	C	A	C	A	C	C	C	C	C
	C	C	C	C	C	C	C	C	C	C	0	C	C	C	C	C	C	C	C	C	C	C	C	A	C	C	C	C	C	C	C	C	C	C	C	C	C	C	C	C	C	A	C	A	C	C	C	C	C
PZE-101043600	T	G	G	T	G	G	G	T	T	T	0	T	G	G	T	G	T	T	G	T	G	T	T	G	T	T	G	T	T	T	T	T	T	G	T	T	G	G	T	T	T	T	T	T	T	T	T	G	G
	T	G	G	T	G	G	G	T	T	T	0	T	G	G	T	G	T	T	G	T	G	T	T	G	T	T	G	T	T	T	T	T	T	G	T	T	G	G	T	T	T	T	T	T	T	T	T	G	G
PZE-101043604	0	A	A	A	A	A	A	0	0	A	A	0	C	A	A	A	A	A	A	A	C	A	A	C	A	A	A	A	A	A	A	0	0	C	A	A	0	C	A	0	A	A	A	A	A	A	A	C	C
	0	A	A	A	A	A	A	0	0	A	A	0	C	A	A	A	A	A	A	A	C	A	A	C	A	A	A	A	A	A	A	0	0	C	A	A	0	C	A	0	A	A	A	A	A	A	A	C	C
PZE-101043656	A	C	A	C	C	C	A	A	C	A	C	A	A	A	C	A	C	A	A	A	A	A	A	A	A	A	C	A	A	C	A	A	A	A	A	A	A	A	A	A	A	A	C	A	A	C	A	A	A
	A	C	A	C	C	C	A	A	C	A	C	A	A	A	C	A	C	A	A	A	A	A	A	A	A	A	C	A	A	C	A	A	A	A	A	A	A	A	A	A	A	A	C	A	A	C	A	A	A
PZE-101043669	T	C	T	C	C	C	T	T	C	T	C	T	T	T	C	T	C	T	T	T	T	T	T	T	T	T	C	T	T	T	T	T	T	T	T	T	T	T	T	T	T	T	C	T	T	T	T	T	T
	T	C	T	C	C	C	T	T	C	T	C	T	T	T	C	T	C	T	T	T	T	T	T	T	T	T	C	T	T	T	T	T	T	T	T	T	T	T	T	T	T	T	C	T	T	T	T	T	T
PZE-101043670	T	C	T	C	C	C	T	T	C	T	C	T	T	T	C	T	C	T	T	T	T	T	T	T	T	T	C	T	T	T	T	T	T	T	T	T	T	T	T	T	T	T	C	T	T	T	T	T	T
	T	C	T	C	C	C	T	T	C	T	C	T	T	T	C	T	C	T	T	T	T	T	T	T	T	T	C	T	T	T	T	T	T	T	T	T	T	T	T	T	T	T	C	T	T	T	T	T	T
PZE-101043674	C	T	C	T	T	T	C	C	T	C	T	C	C	C	T	C	T	C	C	C	C	C	C	T	C	C	T	C	C	C	C	C	C	C	C	C	C	C	C	C	C	C	T	C	C	C	C	C	C
	C	T	C	T	T	T	C	C	T	C	C	C	C	C	T	C	T	C	C	C	C	C	C	T	C	C	C	C	C	C	C	C	C	C	C	C	C	C	C	C	C	C	T	C	C	C	C	C	C
PZE-101043682	T	T	G	T	T	G	T	G	T	G	0	T	G	T	T	G	G	G	G	T	G	G	T	G	T	T	T	T	G	G	G	G	G	G	T	T	G	G	T	G	G	G	T	G	T	G	T	G	T
	T	T	G	T	T	G	T	G	T	G	0	T	G	T	T	G	G	G	G	T	G	G	T	G	T	T	T	T	G	G	G	G	G	G	T	T	G	G	T	G	G	G	T	G	T	G	T	G	T
PZE-101043685	G	G	G	G	G	G	G	G	G	G	G	G	G	G	G	G	G	G	G	G	G	G	G	G	G	G	G	G	G	G	G	G	G	G	G	G	G	G	G	G	G	G	G	G	G	G	G	G	T
	G	G	G	G	G	G	G	G	G	G	G	G	G	G	G	G	G	G	G	G	G	G	G	G	G	G	G	G	G	G	G	G	G	G	G	G	G	G	G	G	G	G	G	G	G	G	G	G	T
PZE-101044115	A	A	A	A	A	C	A	C	C	A	C	A	C	A	A	A	0	A	A	C	C	C	C	A	A	C	C	C	C	C	A	A	A	C	C	C	C	C	A	A	C	A	A	C	C	C	C	A	C
	A	A	A	A	A	C	A	C	C	A	C	A	C	A	A	A	0	A	A	C	C	C	C	A	A	C	C	C	C	C	A	A	A	C	C	C	C	C	A	A	C	C	A	C	C	C	C	A	C
PZE-101044313	A	A	A	A	A	G	A	G	G	G	A	A	G	A	A	G	A	A	A	G	G	A	G	G	G	A	G	A	G	A	A	A	A	A	G	A	A	A	G	A	A	A	A	A	A	A	A	G	A
	A	A	A	A	A	G	A	G	G	G	A	A	G	A	A	G	A	A	A	G	G	A	G	G	G	A	G	A	G	A	A	A	A	A	G	A	A	A	G	A	A	A	A	A	A	A	A	G	A
PZE-101044448	C	A	C	C	C	C	C	0	A	A	A	C	A	0	C	A	C	C	C	C	C	A	C	C	0	C	C	0	C	C	C	C	C	C	C	C	C	0	C	0	C	C	C	0	0	C	0	C	0
	C	A	C	C	C	C	C	0	A	A	A	C	A	0	C	A	C	C	C	C	C	A	C	C	0	C	C	0	C	C	C	C	C	C	C	C	C	0	C	0	C	C	C	0	0	C	0	C	0
PZE-101044520	C	C	C	C	C	C	C	C	C	C	C	C	C	C	C	C	C	C	0	0	C	C	C	C	C	C	C	C	C	T	C	C	C	C	C	C	C	C	0	C	C	C	C	C	C	T	C	C	C
	C	C	C	C	C	C	C	C	C	C	C	C	C	C	C	C	C	C	0	0	C	C	C	C	C	C	C	C	C	T	C	C	C	C	C	C	C	C	0	C	C	C	C	C	C	T	C	C	C
PZE-101044585	T	T	T	T	T	0	T	T	T	T	T	T	T	T	T	T	T	T	T	T	C	T	T	T	0	T	T	T	T	T	T	T	T	T	T	T	T	T	T	T	T	T	T	T	T	T	T	C	T
	T	T	T	T	T	0	T	T	T	T	T	T	T	T	T	T	T	T	T	T	C	T	T	T	0	T	T	T	T	T	T	T	T	T	T	T	T	T	T	T	T	T	T	T	T	T	T	C	T
PZE-101044686	T	T	T	T	T	T	T	T	T	T	T	T	C	T	T	T	T	T	T	T	T	T	T	T	T	T	T	C	T	T	T	T	T	C	T	T	T	T	T	T	T	C	T	T	C	T	T	T	C
	T	T	T	T	T	T	T	T	T	T	T	T	C	T	T	T	T	T	T	T	T	T	T	T	T	T	T	C	T	T	T	T	T	C	T	T	T	T	T	T	T	C	T	T	C	T	T	T	C
PZE-101044692	G	A	A	0	0	A	0	G	0	0	A	G	A	0	G	0	G	G	A	0	0	A	G	G	A	G	A	A	A	A	G	A	A	G	0	A	0	A	0	G	A	G	A	A	A	A	A	A	A
	G	A	A	0	0	A	0	G	0	0	A	G	A	0	G	0	G	G	A	0	0	A	G	G	A	G	A	A	A	A	G	A	A	G	0	A	0	A	0	G	A	G	A	A	A	A	A	A	A
PZE-101044715	T	C	C	T	C	C	T	T	T	T	0	T	C	T	T	T	T	T	C	C	T	C	C	C	C	T	C	T	C	C	T	C	C	T	C	C	T	C	C	T	C	T	T	C	C	C	C	C	T
	T	C	C	T	C	C	T	T	T	T	0	T	C	T	T	T	T	T	C	C	T	C	C	C	C	T	C	T	C	C	T	C	C	T	C	C	T	C	C	T	C	T	T	C	C	C	C	C	T
PZE-101044721	C	C	C	C	C	C	C	C	C	C	T	C	T	C	C	C	C	C	C	T	C	T	C	C	T	C	T	C	C	T	T	C	C	C	C	C	C	C	T	C	C	C	C	C	C	T	C	C	C
	C	C	C	C	C	C	C	C	C	C	T	C	T	C	C	C	C	C	C	T	C	T	C	C	T	C	T	C	C	T	T	C	C	C	C	C	C	C	T	C	C	C	C	C	C	T	C	C	C
PZE-101044748	C	T	T	C	T	C	C	C	C	C	C	C	C	C	C	C	C	C	T	C	C	T	C	C	T	C	T	C	T	T	C	T	T	C	T	T	C	T	C	C	0	C	C	T	C	T	T	C	C
	C	T	T	C	T	C	C	C	C	C	C	C	C	C	C	C	C	C	T	C	C	T	C	C	T	C	T	C	T	T	C	T	T	C	T	T	C	T	C	C	0	C	C	T	C	T	T	C	C
PZE-101044926	G	G	G	G	G	G	G	G	G	G	0	G	G	G	G	G	G	G	G	G	G	G	G	G	G	G	T	G	G	G	G	T	G	T	G	G	G	G	G	T	G	G	G	G	G	G	G	G	G
	G	G	G	G	G	G	G	G	G	G	0	G	G	G	G	G	G	G	G	G	G	G	G	G	G	G	T	G	G	G	G	T	G	T	G	G	G	G	G	T	G	G	G	G	G	G	G	G	G
PZE-101044879	A	A	C	A	A	C	A	A	A	A	A	A	A	A	A	A	A	C	C	A	A	A	A	A	A	A	A	A	C	A	A	C	A	A	A	A	A	C	A	C	A	A	A	A	C	A	C	A	A
	A	A	C	A	A	C	A	A	A	A	A	A	A	A	A	A	A	C	C	A	A	A	A	A	A	A	A	A	C	A	A	C	A	A	A	A	A	C	A	C	A	A	A	A	C	A	C	A	A
PZE-101044787	T	T	T	T	T	0	T	T	T	T	T	T	C	T	T	T	T	T	T	T	C	T	T	T	C	T	0	T	T	C	C	T	C	T	C	C	T	C	T	C	T	C	T	T	T	C	T	C	C
	T	T	T	T	T	0	T	T	T	T	C	T	C	T	T	T	T	T	T	T	C	T	T	T	C	T	0	T	T	C	C	T	C	T	C	C	T	C	T	C	T	C	T	T	T	C	T	C	C
PZE-101044778	0	T	T	T	T	C	0	T	T	T	T	T	T	T	T	T	T	0	T	T	T	T	T	T	T	0	T	T	T	T	T	T	T	T	T	T	T	T	T	T	T	T	T	T	T	T	0	T	T
	0	T	T	T	T	C	0	T	T	T	T	T	T	T	T	T	T	0	T	T	T	T	T	T	T	0	T	T	T	T	T	T	T	T	T	T	T	T	T	T	T	T	T	T	T	T	0	T	T
PZE-101044770	T	C	T	C	C	T	T	C	C	C	0	C	C	C	T	C	C	T	T	C	C	T	T	T	C	T	C	T	T	C	C	T	C	C	C	C	T	C	T	C	C	C	C	C	T	C	T	C	C
	T	C	T	C	C	T	T	C	C	C	0	C	C	C	T	C	C	T	T	C	C	T	T	T	C	T	C	T	T	C	C	T	C	C	C	C	T	C	T	C	C	C	C	C	T	C	T	C	C
PZE-101045061	G	G	G	G	G	G	G	G	G	G	0	G	T	G	G	G	G	G	G	G	T	G	G	G	T	G	T	T	G	T	T	G	T	G	T	T	G	G	T	T	G	T	G	G	G	T	G	T	T
	G	G	G	G	G	G	G	G	G	G	0	G	T	G	G	G	G	G	G	G	T	G	G	G	T	G	T	T	G	T	T	G	T	G	T	T	G	G	T	T	G	T	G	G	G	T	G	T	T
PZE-101045021	C	T	C	T	T	C	C	T	T	T	C	T	C	T	T	T	T	T	C	T	C	C	C	T	C	C	C	T	C	C	C	T	C	C	C	C	T	C	C	C	T	C	T	T	T	C	C	C	C
	C	T	C	T	T	C	C	T	T	T	C	T	C	T	T	T	T	T	C	T	C	C	C	T	C	C	C	T	C	C	C	T	C	C	C	C	T	C	C	C	T	C	T	T	T	C	C	C	C
PZE-101045001	C	T	T	T	T	T	C	T	T	T	T	T	T	T	C	T	T	T	T	T	C	T	T	T	T	C	C	T	C	T	T	T	T	0	C	T	C	T	T	T	T	T	T	T	T	T	T	T	T
	C	T	T	T	T	T	C	T	T	T	T	T	T	T	C	T	T	T	T	T	C	T	T	T	T	C	C	T	C	T	T	T	T	0	C	T	C	T	T	T	T	T	T	T	T	T	T	T	T
PZE-101045009	T	T	C	T	T	T	T	T	T	T	T	T	T	T	T	T	T	T	C	T	T	T	T	T	T	C	T	T	T	C	T	T	T	T	T	T	T	T	T	T	T	C	T	T	C	C	T	C	C
	T	T	C	T	T	T	T	T	T	T	T	T	T	T	T	T	T	T	C	T	T	T	T	T	T	C	T	T	T	C	T	T	T	T	T	T	T	T	T	T	T	C	T	T	C	C	T	C	C
PZE-101045064	T	T	G	T	T	T	T	T	T	T	T	T	T	T	T	T	T	G	G	T	G	0	T	T	T	G	G	T	T	G	T	T	T	G	G	T	T	T	G	T	T	G	T	T	G	G	T	G	G
	T	T	G	T	T	T	T	T	T	T	T	T	T	T	T	T	T	G	G	T	G	0	T	T	T	G	G	T	T	G	T	T	T	G	G	T	T	T	G	T	T	G	T	T	G	G	T	G	G
PZE-101045068	G	G	A	G	G	G	G	G	G	G	G	G	G	G	G	G	G	A	A	G	A	G	G	G	G	A	A	G	G	A	G	G	G	A	A	G	G	G	A	G	G	A	G	G	A	A	G	A	A
	G	G	A	G	G	G	G	G	G	G	G	G	G	G	G	G	G	A	A	G	A	G	G	G	G	A	A	G	G	A	G	G	G	A	A	G	G	G	A	G	G	A	G	G	A	A	G	A	A
PZE-101045070	T	T	G	T	T	T	T	T	T	T	T	T	T	T	T	T	T	G	G	T	G	T	T	T	T	G	G	T	T	G	T	T	T	G	G	T	T	T	G	T	T	G	T	T	G	G	T	G	G
	T	T	G	T	T	T	T	T	T	T	T	T	T	T	T	T	T	G	G	T	G	T	T	T	T	G	G	T	T	G	T	T	T	G	G	T	T	T	G	T	T	G	T	T	G	G	T	G	G
PZE-101045203	C	C	C	C	C	C	T	C	C	C	C	C	C	C	T	C	C	C	C	C	C	T	C	T	C	C	C	C	C	C	C	C	C	C	C	C	T	C	T	T	C	C	C	C	C	C	C	C	C
	C	C	C	C	C	C	T	C	C	C	C	C	C	C	T	C	C	C	C	C	C	T	C	T	C	C	C	C	C	C	C	C	C	C	C	C	T	C	T	T	C	C	C	C	C	C	C	C	C
PZE-101045197	A	A	A	A	A	A	C	A	A	A	A	A	A	A	C	A	A	A	A	A	C	C	A	C	A	A	C	A	A	A	A	A	A	A	C	A	C	A	C	C	A	A	A	A	A	A	C	A	A
	A	A	A	A	A	A	C	A	A	A	A	A	A	A	C	A	A	A	A	A	C	C	A	C	A	A	C	A	A	A	A	A	A	A	C	A	C	A	C	C	A	A	A	A	A	A	C	A	A
PZE-101045153	G	G	G	G	G	G	G	T	G	G	0	G	G	G	T	G	G	T	G	G	T	T	G	T	G	G	0	T	T	G	T	G	G	T	T	G	G	T	T	G	G	T	G	G	G	G	G	G	T
	G	G	G	G	G	G	G	T	G	G	0	G	G	G	T	G	G	T	G	G	T	T	G	T	G	G	0	T	T	G	T	G	G	T	T	G	G	T	T	G	G	T	G	G	G	G	G	G	T
PZE-101045130	G	G	T	G	G	G	G	G	G	G	G	G	G	G	G	G	G	G	T	G	T	G	G	G	G	G	T	G	G	G	G	G	G	G	T	T	G	G	G	T	G	G	G	G	G	G	G	G	G
	G	G	T	G	G	G	G	G	G	G	G	G	G	G	G	G	G	G	T	G	T	G	G	G	G	G	T	G	G	G	G	G	G	G	T	T	G	G	G	T	G	G	G	G	G	G	G	G	G
PZE-101045111	T	T	T	T	T	T	C	C	T	T	T	T	T	T	T	T	T	T	T	T	T	C	C	T	C	C	T	C	C	C	T	T	C	T	T	T	C	C	T	T	T	C	T	T	C	C	C	C	C
	T	T	T	T	T	T	C	C	T	T	T	T	T	T	T	T	T	T	T	T	T	C	C	T	C	C	T	C	C	C	T	T	C	T	T	T	C	C	T	T	T	C	T	T	C	C	C	C	C
PZE-101045108	G	G	G	G	G	G	G	G	G	G	0	G	T	G	G	G	G	G	G	G	G	G	G	T	G	G	G	G	G	G	G	T	G	G	G	G	G	0	G	G	G	G	G	G	G	G	G	G	G
	G	G	G	G	G	G	G	G	G	G	0	G	T	G	G	G	G	G	G	G	G	G	G	T	G	G	G	G	G	G	G	T	G	G	G	G	G	0	G	G	G	G	G	G	G	G	G	G	G
PZE-101045092	G	A	G	G	0	G	G	A	G	G	G	A	G	A	G	G	G	G	G	G	A	G	0	G	0	0	A	G	A	G	G	G	G	G	G	A	A	G	G	A	G	G	G	G	G	G	A	G	G
	G	G	G	G	0	G	G	G	G	G	G	G	G	G	G	G	G	G	G	G	A	G	0	G	0	0	G	G	G	G	G	G	G	G	G	G	G	G	G	G	G	G	G	G	G	G	G	G	G
PZE-101045249	A	A	A	A	A	A	G	G	A	A	0	A	A	A	A	A	A	A	A	A	A	G	G	A	G	A	A	G	G	G	G	G	A	A	A	A	G	A	A	A	A	G	A	A	G	G	G	A	G
	A	A	A	A	A	A	G	G	A	A	0	A	A	A	A	A	A	A	A	A	A	G	G	A	G	A	A	G	G	G	G	G	A	A	A	A	G	A	A	A	A	G	A	A	G	G	G	A	G
PZE-101045301	C	C	C	C	C	C	C	C	C	C	C	C	C	C	T	C	C	T	C	C	C	C	C	C	C	T	C	C	C	C	C	C	C	C	C	C	C	C	T	C	C	T	C	C	C	C	C	T	C
	C	C	C	C	C	C	C	C	C	C	C	C	C	C	T	C	C	T	C	C	C	C	C	C	C	T	C	C	C	C	C	C	C	C	C	C	C	C	T	C	C	T	C	C	C	C	C	T	C
PZE-101045444	G	G	G	G	G	G	G	G	G	G	G	G	G	G	A	G	G	G	G	G	G	G	A	G	G	G	G	G	G	G	A	G	A	G	G	G	G	G	G	G	G	G	G	G	A	G	G	G	G
	G	G	G	G	G	G	G	G	G	G	G	G	G	G	A	G	G	G	G	G	G	G	A	G	G	G	G	G	G	G	A	G	A	G	G	G	G	G	G	G	G	G	G	G	A	G	G	G	G
PZE-101045481	G	G	G	G	G	G	G	G	G	G	G	G	G	G	G	G	G	G	G	G	G	G	A	G	G	G	G	G	G	G	A	G	A	G	G	G	G	G	G	G	G	G	G	G	A	G	G	G	G
	G	G	G	G	G	G	G	G	G	G	G	G	G	G	G	G	G	G	G	G	G	G	A	G	G	G	G	G	G	G	A	G	A	G	G	G	G	G	G	G	G	G	G	G	A	G	G	G	G
PZE-101045505	C	C	C	C	C	C	C	C	C	C	C	C	C	C	C	C	C	0	C	C	C	C	A	C	0	C	C	C	C	C	A	C	A	C	C	C	C	C	C	C	C	C	C	C	A	C	C	0	C
	C	C	C	C	C	C	C	C	C	C	C	C	C	C	C	C	C	0	C	C	C	C	A	C	0	C	C	C	C	C	A	C	A	C	C	C	C	C	C	C	C	C	C	C	A	C	C	0	C
PZE-101045519	A	A	A	A	A	A	A	A	A	A	A	0	A	A	A	A	A	A	A	A	A	A	G	A	A	A	A	A	A	A	G	A	G	A	A	A	A	A	A	A	A	A	A	A	G	A	A	G	A
	A	A	A	A	A	A	A	A	A	A	A	0	A	A	A	A	A	A	A	A	A	A	G	A	A	A	A	A	A	A	G	A	G	A	A	A	A	A	A	A	A	A	A	A	G	A	A	G	A
PZE-101045549	T	T	T	T	T	T	C	C	T	T	T	C	T	T	T	T	C	C	T	T	T	T	C	T	T	T	T	T	T	T	C	T	C	T	T	T	T	T	T	T	T	T	T	T	C	T	T	C	T
	T	T	T	T	T	T	C	C	T	T	T	C	T	T	T	T	C	C	T	T	T	T	C	T	T	T	T	T	T	T	C	T	C	T	T	T	T	T	T	T	T	T	T	T	C	T	T	C	T
PZE-101045606	C	C	C	C	C	C	T	T	C	C	C	T	C	C	C	C	T	T	C	C	C	C	T	C	C	C	C	C	C	C	T	C	T	C	C	C	C	C	C	C	C	C	C	C	T	C	C	T	C
	C	C	C	C	C	C	T	T	C	C	C	T	C	C	C	C	T	T	C	C	C	C	T	C	C	C	C	C	C	C	T	C	T	C	C	C	C	C	C	C	C	C	C	C	T	C	C	T	C
PZE-101045616	T	T	T	T	T	T	C	C	T	T	T	C	T	T	T	T	0	C	T	T	T	T	T	T	T	T	T	T	T	T	T	C	C	C	T	T	T	T	T	T	0	T	T	0	C	T	T	C	T
	T	T	T	T	T	T	C	C	T	T	T	C	T	T	T	T	0	C	T	T	T	T	T	T	T	T	T	T	T	T	T	C	C	C	T	T	T	T	T	T	0	T	T	0	C	T	T	C	T
PZE-101046080	G	G	G	G	G	G	T	G	G	G	G	G	T	G	G	G	G	G	G	G	G	G	G	T	G	T	G	0	G	G	G	G	T	G	G	G	T	G	G	G	G	G	G	G	G	G	G	G	G
	G	G	G	G	G	G	T	G	G	G	G	G	T	G	G	G	G	G	G	G	G	G	G	T	G	T	G	0	G	G	G	G	T	G	G	G	T	G	G	G	G	G	G	G	G	G	G	G	G
PZE-101046057	A	A	A	A	A	G	G	A	A	A	A	A	A	A	A	A	A	G	A	A	G	A	G	G	A	G	G	A	G	G	G	G	G	A	G	A	G	A	G	A	A	A	A	A	G	G	A	A	A
	A	A	A	A	A	G	G	A	A	A	A	A	A	A	A	A	A	G	A	A	G	A	G	G	A	G	G	A	G	G	G	G	G	A	G	A	G	A	G	A	A	A	A	A	G	G	A	A	A
PZE-101046045	G	G	G	G	G	G	A	G	G	G	G	G	G	G	G	G	G	A	G	G	G	G	G	A	G	A	G	G	A	G	G	A	A	G	G	G	A	G	G	G	G	G	G	G	G	G	G	G	G
	G	G	G	G	G	G	A	G	G	G	G	G	G	G	G	G	G	A	G	G	G	G	G	A	G	A	G	G	A	G	G	A	A	G	G	G	A	G	G	G	G	G	G	G	G	G	G	G	G
PZE-101046128	G	G	A	G	A	G	G	G	G	G	A	A	G	A	A	G	A	G	A	A	A	A	G	G	A	G	A	G	G	G	A	G	A	G	A	G	G	G	G	A	G	A	G	G	G	G	G	A	A
	G	G	A	G	A	G	G	G	G	G	A	A	G	A	A	G	A	G	A	A	A	A	G	G	A	G	A	G	G	G	A	G	A	G	A	G	G	G	G	A	G	A	G	G	G	G	G	A	A
PZE-101046132	A	A	G	A	G	A	G	G	A	A	G	G	G	G	G	G	G	G	G	G	G	G	G	G	G	G	G	A	G	G	G	G	G	A	G	G	G	G	G	G	A	G	A	A	G	G	A	G	G
	A	A	G	A	G	A	G	G	A	A	G	G	G	G	G	G	G	G	G	G	G	G	G	G	G	G	G	A	G	G	G	G	G	A	G	G	G	G	G	G	A	G	A	A	G	G	A	G	G
PZE-101046735	C	A	C	A	A	A	C	A	C	A	0	A	A	A	A	A	A	C	C	A	C	A	A	C	A	C	C	C	A	C	A	A	C	C	A	C	C	A	C	A	C	C	A	C	A	C	A	C	C
	C	A	C	A	A	A	C	A	C	A	0	A	A	A	A	A	A	C	C	A	C	A	A	C	A	C	C	C	A	C	A	A	C	C	A	C	C	A	C	A	C	C	A	C	A	C	A	C	C
PZE-101046755	A	A	A	G	A	A	G	A	A	A	A	A	A	A	A	A	G	G	A	G	A	A	A	G	G	G	A	G	A	G	G	A	G	G	A	G	A	A	G	G	A	A	A	A	A	G	A	G	G
	A	A	A	G	A	A	G	A	A	A	A	A	A	A	A	A	G	G	A	G	A	A	A	G	G	G	A	G	A	G	G	A	G	G	A	G	A	A	G	G	A	A	A	A	A	G	A	G	G
PZE-101046835	C	0	C	C	0	C	C	C	0	C	C	C	C	A	A	C	A	C	C	A	A	C	C	C	A	C	A	C	C	C	0	0	0	C	C	A	C	0	C	C	A	C	0	C	C	C	C	C	C
	C	0	C	C	0	C	C	C	0	C	C	C	C	A	A	C	A	C	C	A	A	C	C	C	A	C	A	C	C	C	0	0	0	C	C	A	C	0	C	C	A	C	0	C	C	C	C	C	C
PZE-101046844	C	T	C	C	T	C	C	C	T	C	C	C	C	C	C	C	C	C	C	C	T	C	C	C	T	C	T	C	C	C	T	T	T	C	C	T	C	T	C	C	T	C	C	C	C	C	C	C	C
	C	T	C	C	T	C	C	C	T	C	C	C	C	C	C	C	C	C	C	C	T	C	C	C	T	C	T	C	C	C	T	T	T	C	C	T	C	T	C	C	T	C	C	C	C	C	C	C	C
PZE-101046858	C	T	C	T	T	C	T	T	T	C	0	T	C	C	C	T	T	T	C	C	T	T	T	T	T	C	T	C	T	T	T	T	T	T	T	T	T	T	T	T	T	T	C	C	T	T	T	T	T
	C	T	C	T	T	C	T	T	T	C	0	T	C	C	C	T	T	T	C	C	T	T	T	T	T	C	T	C	T	T	T	T	T	T	T	T	T	T	T	T	T	T	C	C	T	T	T	T	T
PZE-101046859	A	A	A	G	A	A	G	G	A	A	A	G	A	G	G	G	G	G	A	G	A	G	G	G	A	A	A	A	G	G	A	A	A	G	G	A	G	A	G	G	A	G	G	A	G	G	G	G	G
	A	A	A	G	A	A	G	G	A	A	A	G	A	G	G	G	G	G	A	G	A	G	G	G	A	G	A	G	G	G	A	A	A	G	G	A	G	A	G	G	A	G	G	A	G	G	G	G	G
PZE-101046876	A	A	G	A	A	G	A	G	A	A	G	G	G	A	A	A	A	G	G	A	A	G	G	A	A	A	A	A	G	G	A	A	A	G	G	A	A	A	G	G	A	G	A	G	G	G	G	G	G
	A	A	G	A	A	G	A	G	A	A	G	G	G	A	A	A	A	G	G	A	A	G	G	A	A	A	A	A	G	G	A	A	A	G	G	A	A	A	G	G	A	G	A	G	G	G	G	G	G
PZE-101046931	A	G	G	G	A	G	G	A	A	A	G	A	G	A	A	G	G	A	G	G	A	G	A	G	A	G	A	G	A	G	G	A	A	A	A	A	G	A	A	A	A	A	A	G	A	G	G	A	A
	A	G	G	G	A	G	G	A	A	A	G	A	G	A	A	G	G	A	G	G	A	G	A	G	A	G	A	G	A	G	G	A	A	A	A	A	G	A	A	A	A	A	A	G	A	G	G	A	A
PZE-101046967	C	C	C	C	C	C	C	C	C	C	C	C	C	T	C	C	C	C	C	C	C	C	C	C	C	C	C	C	C	C	C	C	C	C	C	C	C	C	C	C	C	C	T	C	C	C	C	C	C
	C	C	C	C	C	C	C	C	C	C	C	C	C	T	C	C	C	C	C	C	C	C	C	C	C	C	C	C	C	C	C	C	C	C	C	C	C	C	C	C	C	C	T	C	C	C	C	C	C
PZE-101047349	G	G	G	G	A	A	G	G	G	G	G	0	G	G	G	G	G	G	G	G	G	0	G	0	G	0	G	0	G	G	G	G	G	G	G	G	G	G	G	G	G	G	G	G	G	G	G	0	G
	G	G	G	G	A	A	G	G	G	G	G	0	G	G	G	G	G	G	G	G	G	0	G	0	G	0	G	0	G	G	G	G	G	G	G	G	G	G	G	G	G	G	G	G	G	G	G	0	G
PZE-101047390	T	T	0	C	T	T	C	C	T	T	T	T	C	T	C	C	C	T	C	T	T	T	C	C	T	T	0	T	T	C	T	C	C	T	C	T	T	C	T	T	T	T	T	C	T	C	C	C	C
	T	T	0	C	T	T	C	C	T	T	T	T	C	T	C	C	C	T	C	T	T	T	C	C	T	T	0	T	T	C	T	C	C	T	C	T	T	C	T	T	T	T	T	C	T	C	C	C	C
PZE-101047517	A	G	G	G	G	G	G	G	G	G	G	G	G	G	G	G	G	A	G	A	A	G	G	A	G	A	A	A	A	A	A	A	G	A	G	A	G	A	A	G	G	A	G	G	A	A	A	A	G
	A	G	G	G	G	G	G	G	G	G	G	G	G	G	G	G	G	A	G	A	A	G	G	A	G	A	A	A	A	A	A	A	G	A	G	A	G	A	A	G	G	A	G	G	A	A	A	A	G
PZE-101047611	G	A	G	A	A	G	G	A	A	A	0	A	A	G	A	A	A	G	G	A	A	G	A	A	A	G	A	G	A	A	G	A	A	G	A	A	A	A	G	A	A	A	A	A	A	A	A	A	A
	G	A	G	A	A	G	G	A	A	A	0	A	A	G	A	A	A	G	G	A	A	G	A	A	A	G	A	G	A	A	G	A	A	G	A	A	A	A	G	A	A	A	A	A	A	A	A	A	A
PZE-101047696	C	T	C	C	C	C	T	T	C	T	C	T	C	C	T	C	C	C	C	T	C	C	C	C	C	T	C	T	C	C	T	C	T	T	C	T	C	C	C	C	C	T	C	C	T	C	C	C	C
	C	T	C	C	C	C	T	T	C	T	C	T	C	C	T	C	C	C	C	T	C	C	C	C	C	T	C	T	C	C	T	C	T	T	C	T	C	C	C	C	C	T	C	C	T	C	C	C	C
PZE-101047925	C	C	T	C	C	T	C	T	C	T	0	C	C	C	C	C	C	C	T	C	C	C	C	C	C	T	C	T	C	C	C	C	C	C	C	C	T	C	C	C	C	C	C	C	C	C	C	T	T
	C	C	T	C	C	T	C	T	C	T	0	C	C	C	C	C	C	C	T	C	C	C	C	C	C	T	C	T	C	C	C	C	C	C	C	C	T	C	C	C	C	C	C	C	C	C	C	T	T
PZE-101048115	G	A	G	G	A	A	G	A	G	G	G	A	A	G	G	G	A	G	G	G	G	A	A	A	G	G	G	G	G	A	G	A	G	A	G	G	G	A	G	G	G	A	G	G	G	A	G	A	G
	G	A	G	G	A	A	G	A	G	G	G	A	A	G	G	G	A	G	G	G	G	A	A	A	G	G	G	G	G	A	G	A	G	A	G	G	G	A	G	G	G	A	G	G	G	A	G	A	G
PZE-101048164	C	T	C	C	C	C	C	C	C	0	C	C	C	0	C	C	C	T	C	T	C	C	T	C	C	C	C	C	C	T	C	C	C	C	C	C	C	C	T	T	C	T	C	C	C	T	C	C	C
	C	T	C	C	C	C	C	C	C	0	C	C	C	0	C	C	C	T	C	T	C	C	T	C	C	C	C	C	C	T	C	C	C	C	C	C	C	C	T	T	C	T	C	C	C	T	C	C	C
PZE-101048542	C	C	0	C	T	T	C	C	C	C	C	T	T	C	0	C	C	C	0	0	C	C	T	0	C	T	C	C	C	C	C	T	C	C	C	C	C	C	C	C	C	C	C	T	C	C	T	T	C
	C	C	0	C	T	T	C	C	C	C	C	T	T	C	0	C	C	C	0	0	C	C	T	0	C	T	C	C	C	C	C	T	C	C	C	C	C	C	C	C	C	C	C	T	C	C	T	T	C
PZE-101048608	C	T	C	C	C	C	0	C	C	C	C	C	C	C	C	C	C	T	C	C	T	C	C	C	T	C	C	C	T	T	C	C	C	C	C	C	C	C	T	C	C	C	C	C	C	0	0	C	C
	C	T	C	C	C	C	0	C	C	C	C	C	C	C	C	C	C	T	C	C	T	C	C	C	T	C	C	C	T	T	C	C	C	C	C	C	C	C	T	C	C	C	C	C	C	0	0	C	C
PZE-101048629	T	T	T	T	C	C	T	T	C	T	T	T	C	T	T	T	C	T	T	T	T	C	C	T	T	T	T	C	T	T	T	C	C	T	T	T	T	T	T	C	C	T	T	T	C	T	T	T	T
	T	T	T	T	C	C	T	T	C	T	T	T	C	T	T	T	C	T	T	T	T	C	C	T	T	T	T	C	T	T	T	C	C	T	T	T	T	T	T	C	C	T	T	T	C	T	T	T	T
PZE-101048744	G	T	T	G	G	T	T	G	T	T	T	T	T	G	T	T	T	T	T	T	T	T	T	G	T	T	G	G	T	G	T	T	G	G	T	T	G	G	T	G	T	T	G	G	G	G	G	T	G
	G	T	T	G	G	T	T	G	T	T	T	T	T	G	T	T	T	T	T	T	T	T	T	G	T	T	G	G	T	G	T	T	G	G	T	T	G	G	T	G	T	T	G	G	G	G	G	T	G
PZE-101048807	G	T	G	T	G	T	G	G	G	T	0	G	T	T	G	T	G	T	G	G	G	T	G	G	G	G	G	G	G	G	G	T	G	T	G	G	G	G	T	G	T	T	G	G	G	G	G	G	T
	G	T	G	T	G	T	G	G	G	T	0	G	T	T	G	T	G	T	G	G	G	T	G	G	G	G	G	G	G	G	G	T	G	T	G	G	G	G	T	G	T	T	G	G	G	G	G	G	T
PZE-101048857	T	C	C	C	T	C	T	T	T	C	C	C	T	C	C	C	T	C	C	C	C	C	T	T	T	T	T	T	T	T	T	T	T	C	C	T	T	T	C	T	C	C	T	T	T	T	T	T	C
	T	C	C	C	T	C	T	T	T	C	C	C	T	C	C	C	T	C	C	C	C	C	T	T	T	T	T	T	T	T	T	T	T	C	C	T	T	T	C	T	C	C	T	T	T	T	T	T	C
PZE-101048890	A	A	A	A	A	G	A	A	A	G	0	A	A	A	A	G	A	A	A	A	A	G	A	G	G	A	A	G	G	G	A	G	A	A	G	G	A	G	A	G	G	A	A	G	G	G	A	A	A
	A	A	A	A	A	G	A	A	A	G	0	A	A	A	A	G	A	A	A	A	A	G	A	G	G	A	A	G	G	G	A	G	A	A	G	G	A	G	A	G	G	A	A	G	G	G	A	A	A
PZE-101048892	G	G	A	A	G	G	G	G	A	A	A	A	G	G	A	A	A	G	G	G	A	A	G	A	G	G	G	A	G	A	G	A	G	G	G	A	G	A	G	G	G	G	G	A	G	A	A	G	G
	G	G	A	A	G	G	G	G	A	A	A	A	G	G	A	A	A	G	G	G	A	A	G	A	G	G	G	A	G	A	G	A	G	G	G	A	G	A	G	G	G	G	G	A	G	A	A	G	G
PZE-101049044	G	G	A	G	G	G	G	A	G	G	G	G	A	A	G	G	G	G	G	G	G	G	G	G	G	G	G	G	G	G	G	G	G	G	G	G	G	G	G	G	G	G	G	G	G	G	G	A	G
	G	G	A	G	G	G	G	A	G	G	G	G	A	A	G	G	G	G	G	G	G	G	G	G	G	G	G	G	G	G	G	G	G	G	G	G	G	G	G	G	G	G	G	G	G	G	G	A	G
PZE-101049091	C	C	C	C	C	T	C	C	C	C	C	C	C	C	C	C	C	T	C	T	C	C	T	T	C	C	C	T	T	C	C	T	T	C	T	T	C	T	C	T	T	T	C	C	C	C	C	C	C
	C	C	C	C	C	T	C	C	C	C	C	C	C	C	C	C	C	T	C	T	C	C	T	T	C	C	C	T	T	C	C	T	T	C	T	T	C	T	C	T	T	T	C	C	C	C	C	C	C
PZE-101049120	G	G	A	A	A	G	A	A	A	A	A	A	A	A	A	A	A	G	A	G	A	A	G	G	G	A	A	A	G	A	A	G	A	A	G	A	A	A	G	G	A	G	G	A	G	A	A	A	0
	G	G	A	A	A	G	A	A	A	A	A	A	A	A	A	A	A	G	A	G	A	A	G	G	G	A	A	A	G	A	A	G	A	A	G	A	A	A	G	G	A	G	G	A	G	A	A	A	0
PZE-101049125	A	A	G	G	G	A	G	G	G	G	G	G	G	G	G	G	G	A	G	A	G	G	A	A	A	G	G	G	A	G	G	A	G	G	A	G	G	G	A	A	G	A	A	G	A	G	G	G	A
	A	A	G	G	G	A	G	G	G	G	G	G	G	G	G	G	G	A	G	A	G	G	A	A	A	G	G	G	A	G	G	A	G	G	A	G	G	G	A	A	G	A	A	G	A	G	G	G	G
PZE-101049395	A	A	G	A	G	G	A	A	A	A	0	G	A	A	A	A	A	A	G	A	A	G	A	G	G	A	A	A	G	A	A	G	A	A	A	A	A	G	A	G	G	A	A	A	A	A	A	G	A
	A	A	G	A	G	G	A	A	A	A	0	G	A	A	A	A	A	A	G	A	A	G	A	G	G	A	A	A	G	A	A	G	A	A	A	A	A	G	A	G	G	A	A	A	A	A	A	G	A
PZE-101049396	A	A	C	C	C	C	C	C	C	C	0	C	A	C	A	A	C	C	C	A	C	C	A	C	C	A	C	C	C	A	C	C	C	A	C	C	A	C	C	C	C	A	C	C	C	A	A	C	A
	A	A	C	C	C	C	C	C	C	C	0	C	A	C	A	A	C	C	C	A	C	C	A	C	C	A	C	C	C	A	C	C	C	A	C	C	A	C	C	C	C	A	C	C	C	A	A	C	C
PZE-101049401	G	G	G	A	G	G	A	G	G	A	G	G	G	G	G	G	A	A	G	G	G	G	G	G	G	G	A	G	G	G	A	G	A	G	A	A	A	G	A	G	G	G	A	G	G	G	G	G	G
	G	G	G	A	G	G	A	G	G	A	G	G	G	G	G	G	A	A	G	G	G	G	G	G	G	G	A	G	G	G	A	G	A	G	A	A	A	G	A	G	G	G	A	G	G	G	G	G	G
PZE-101049539	T	T	T	T	T	T	T	T	T	T	0	T	C	T	T	T	T	C	T	T	T	T	T	T	T	T	C	T	T	T	T	T	C	T	C	T	T	T	C	C	T	T	T	T	T	T	T	T	T
	T	T	T	T	T	T	T	T	T	T	0	T	C	T	T	T	T	C	T	T	T	T	T	T	T	T	C	T	T	T	T	T	C	T	C	T	T	T	C	C	T	T	T	T	T	T	T	T	C
PZE-101049608	T	G	G	G	G	G	G	T	T	T	G	G	G	T	G	T	G	G	G	G	T	G	T	G	G	G	T	G	G	G	G	G	T	G	T	G	G	G	G	T	G	G	G	T	T	G	T	T	G
	T	G	G	G	G	G	G	T	T	T	G	G	G	T	G	T	G	G	G	G	T	G	T	G	G	G	T	G	G	G	G	G	T	G	T	G	G	G	G	T	G	G	G	T	T	G	T	T	G
PZE-101049707	A	A	C	A	A	C	A	A	A	A	C	A	C	A	A	A	C	A	A	A	A	A	A	A	C	A	C	C	C	A	C	A	C	C	C	A	A	C	A	A	C	C	A	A	C	A	A	C	C
	A	A	C	A	A	C	A	A	A	A	C	A	C	A	A	A	C	A	A	A	A	A	A	A	C	A	C	C	C	A	C	A	C	C	C	A	A	C	A	A	C	C	A	A	C	A	A	C	C
PZE-101049995	A	A	A	A	A	A	A	A	G	A	A	A	A	A	A	A	A	A	A	G	G	A	A	A	A	A	A	A	G	A	A	A	A	A	A	A	A	G	A	A	A	G	A	G	A	A	A	A	A
	A	A	A	A	A	A	A	A	G	A	A	A	A	A	A	A	A	A	A	G	G	A	A	A	A	A	A	A	G	A	A	A	A	A	A	A	A	G	A	A	A	G	A	G	A	A	A	A	A
PZE-101050010	C	T	C	C	C	C	C	C	T	C	C	C	C	C	C	C	T	C	C	C	C	C	C	C	C	C	C	T	C	C	T	C	C	C	C	T	C	C	C	T	C	T	C	T	C	C	C	C	T
	C	T	C	C	C	C	C	C	T	C	C	C	C	C	C	C	T	C	C	C	C	C	C	C	C	C	C	T	C	C	T	C	C	C	C	T	C	C	C	T	C	T	C	T	C	C	C	C	C
PZE-101050072	G	T	G	T	G	T	T	G	G	G	0	T	G	G	T	G	G	T	G	T	G	T	G	G	T	T	G	G	G	G	G	G	G	T	G	G	G	G	T	G	T	G	T	T	T	G	G	T	T
	G	T	G	T	G	T	T	G	G	G	0	T	G	G	T	G	G	T	G	T	G	T	G	G	T	T	G	G	G	G	G	G	G	T	G	G	G	G	T	G	T	G	T	T	T	G	G	T	G
PZE-101050073	C	C	C	C	A	C	C	C	C	C	C	C	C	C	C	C	C	C	A	C	C	C	A	C	C	C	C	C	C	C	A	C	C	C	C	C	C	A	C	C	C	C	C	C	C	C	A	C	C
	C	C	C	C	A	C	C	C	C	C	C	C	C	C	C	C	C	C	A	C	C	C	A	C	C	C	C	C	C	C	A	C	C	C	C	C	C	A	C	C	C	C	C	C	C	C	A	C	C
PZE-101050075	G	A	G	G	G	A	G	G	G	G	G	G	G	G	G	G	G	G	A	G	G	G	G	A	A	G	G	G	G	G	G	A	G	A	G	G	G	G	G	G	G	G	G	A	G	G	G	A	0
	G	A	G	G	G	A	G	G	G	G	G	G	G	G	G	G	G	G	A	G	G	G	G	A	A	G	G	G	G	G	G	A	G	A	G	G	G	G	G	G	G	G	G	A	G	G	G	A	0
PZE-101050128	G	A	A	G	A	A	G	A	G	A	0	G	A	A	G	G	A	G	G	G	G	G	A	G	G	G	A	G	G	A	A	G	G	A	G	G	G	A	G	A	A	G	A	G	A	A	A	A	A
	G	A	A	G	A	A	G	A	G	A	0	G	A	A	G	G	A	G	G	G	G	G	A	G	G	G	A	G	G	A	A	G	G	A	G	G	G	A	G	A	A	G	A	G	A	A	A	A	G
PZE-101050207	A	A	G	A	G	A	G	A	0	A	0	A	G	A	G	A	A	G	A	G	A	A	A	G	A	A	A	G	A	A	A	G	A	G	A	A	A	A	G	A	A	A	G	G	A	A	G	A	G
	A	A	G	A	G	A	G	A	0	A	0	A	G	A	G	A	A	G	A	G	A	A	A	G	A	A	A	G	A	A	A	G	A	G	A	A	A	A	G	A	A	A	G	G	A	A	G	A	G
PZE-101050289	C	A	C	C	A	A	C	C	C	C	C	C	C	C	C	C	C	C	C	C	C	C	C	C	A	C	C	C	C	C	C	C	C	C	C	A	C	C	C	C	C	C	C	C	C	C	C	C	C
	C	A	C	C	A	A	C	C	C	C	C	C	C	C	C	C	C	C	C	C	C	C	C	C	A	C	C	C	C	C	C	C	C	C	C	A	C	C	C	C	C	C	C	C	C	C	C	C	C
PZE-101050298	T	C	T	T	T	C	T	T	T	T	T	T	T	T	T	T	T	T	T	T	T	T	T	T	C	T	T	T	T	T	T	T	T	T	T	C	T	T	T	T	T	T	T	T	T	T	T	T	T
	T	C	T	T	T	C	T	T	T	T	T	T	T	T	T	T	T	T	T	T	T	T	T	T	C	T	T	T	T	T	T	T	T	T	T	C	T	T	T	T	T	T	T	T	T	T	T	T	T
PZE-101050299	A	C	A	A	A	C	A	A	A	A	A	A	A	A	A	A	A	A	A	A	A	A	A	A	C	A	A	A	A	A	A	A	A	A	A	C	A	A	A	A	A	A	A	A	A	A	A	A	A
	A	C	A	A	A	C	A	A	A	A	A	A	A	A	A	A	A	A	A	A	A	A	A	A	C	A	A	A	A	A	A	A	A	A	A	C	A	A	A	A	A	A	A	A	A	A	A	A	A
PZE-101050621	G	T	G	G	T	G	T	G	G	G	T	T	T	T	T	T	G	T	G	T	T	T	G	G	T	T	T	T	T	T	T	T	T	T	T	T	G	T	T	T	T	G	T	T	T	T	T	T	T
	G	T	G	G	T	G	T	G	G	G	T	T	T	T	T	T	G	T	G	T	T	T	G	G	T	T	T	T	T	T	T	T	T	T	T	T	G	T	T	T	T	G	T	T	T	T	T	T	T
PZE-101050744	C	A	C	C	C	C	A	C	C	C	C	A	A	C	C	A	C	C	A	A	C	0	C	C	A	C	A	A	A	0	C	C	C	A	C	A	A	C	C	C	A	A	A	A	C	0	C	A	A
	C	A	C	C	C	C	A	C	C	C	C	A	A	C	C	A	C	C	A	A	C	0	C	C	A	C	A	A	A	0	C	C	C	A	C	A	A	C	C	C	A	A	A	A	C	0	C	A	A
PZE-101051346	C	C	C	C	T	C	C	C	C	0	0	C	C	C	C	C	C	C	T	C	C	C	C	C	C	0	C	C	C	C	C	C	C	C	T	C	C	C	C	C	C	C	C	0	C	C	C	C	T
	C	C	C	C	T	C	C	C	C	0	0	C	C	C	C	C	C	C	T	C	C	C	C	C	C	0	C	C	C	C	C	C	C	C	T	C	C	C	C	C	C	C	C	0	C	C	C	C	C
PZE-101051588	G	G	G	G	G	G	G	G	G	G	G	G	G	G	G	G	G	G	G	G	G	G	G	G	G	G	G	G	G	G	G	G	G	G	G	G	G	G	G	A	G	G	0	G	G	G	G	G	G
	G	G	G	G	G	G	G	G	G	G	G	G	G	G	G	G	G	G	G	G	G	G	G	G	G	G	G	G	G	G	G	G	G	G	G	G	G	G	G	A	G	G	0	G	G	G	G	G	G
PZE-101051733	G	G	G	A	G	G	G	G	G	G	G	G	G	G	G	G	G	A	G	G	A	A	A	A	G	A	G	G	G	G	G	A	A	A	G	G	G	A	A	A	A	G	0	A	G	G	A	A	G
	G	G	G	A	G	G	G	G	G	G	G	G	G	G	G	G	G	A	G	G	A	A	G	A	G	A	G	G	G	G	G	A	A	A	G	G	G	A	A	A	A	G	0	A	G	G	A	A	G
PZE-101051764	A	A	C	A	A	A	A	A	A	A	A	A	C	A	A	A	A	A	A	A	A	A	A	A	A	A	A	A	A	A	A	A	A	A	A	A	A	A	A	A	A	A	0	A	A	A	A	A	A
	A	A	C	A	A	A	A	A	A	A	A	A	C	A	A	A	A	A	A	A	A	A	A	A	A	A	A	A	A	A	A	A	A	A	A	A	A	A	A	A	A	A	0	A	A	A	A	A	A
PZE-101051858	G	T	T	G	G	G	G	G	G	G	G	G	T	G	G	G	G	G	G	G	G	G	G	G	0	G	T	G	0	0	G	G	G	G	G	G	G	G	G	G	G	G	T	G	0	0	G	G	0
	G	T	T	G	G	G	G	G	G	G	G	G	T	G	G	G	G	G	G	G	G	G	G	G	0	G	T	G	0	0	G	G	G	G	G	G	G	G	G	G	G	G	T	G	0	0	G	G	0
PZE-101051938	C	T	T	T	T	T	C	C	C	C	0	C	C	T	C	C	T	T	T	T	T	C	T	C	C	T	C	T	T	C	C	C	C	C	T	C	T	T	T	C	T	T	T	C	T	C	T	C	0
	C	T	T	T	T	T	C	C	C	C	0	C	C	T	C	C	T	T	T	T	T	C	T	C	C	T	C	T	T	C	C	C	C	C	T	C	T	T	T	C	T	T	T	C	T	C	T	C	0
PZE-101051939	G	G	G	G	G	G	G	G	G	G	G	G	G	G	G	A	G	G	G	G	G	G	G	G	A	G	G	G	G	A	G	G	A	G	G	A	G	G	G	G	G	G	G	G	G	A	G	G	A
	G	G	G	G	G	G	G	G	G	G	G	G	G	G	G	A	G	G	G	G	G	G	G	G	A	G	G	G	G	A	G	G	A	G	G	A	G	G	G	G	G	G	G	G	G	A	G	G	G
PZE-101052000	C	C	C	C	C	C	C	C	C	C	C	C	C	C	T	C	C	C	C	C	C	C	C	T	C	C	C	C	C	C	T	T	C	T	C	C	C	C	C	T	C	C	C	C	C	C	C	C	C
	C	C	C	C	C	C	C	C	C	C	C	C	C	C	T	C	C	C	C	C	C	C	C	T	C	C	C	C	C	C	T	T	C	T	C	C	C	C	C	T	C	C	C	C	C	C	C	C	C
PZE-101052027	A	G	G	G	G	G	G	A	G	A	0	A	A	G	G	G	G	G	G	G	G	A	G	G	G	G	A	G	G	G	G	G	G	G	G	G	G	G	G	G	G	G	G	A	G	G	G	A	G
	A	G	G	G	G	G	G	A	G	A	0	A	A	G	G	G	G	G	G	G	G	A	G	G	G	G	A	G	G	G	G	G	G	G	G	G	G	G	G	G	G	G	G	A	G	G	G	A	G
PZE-101052155	A	C	C	C	C	C	C	A	A	C	0	C	C	C	C	C	C	C	C	C	C	A	C	C	C	C	A	C	C	C	C	C	C	C	C	C	C	C	C	C	C	C	C	C	C	C	C	C	C
	A	C	C	C	C	C	C	A	A	C	0	C	C	C	C	C	C	C	C	C	C	A	C	C	C	C	A	C	C	C	C	C	C	C	C	C	C	C	C	C	C	C	C	C	C	C	C	C	C
PZE-101052221	T	C	C	C	C	C	T	T	T	T	0	T	T	C	C	C	C	T	C	C	T	T	C	C	C	C	T	T	T	C	C	C	C	C	T	C	C	C	C	C	T	T	C	T	C	C	T	T	T
	T	C	C	C	C	C	T	T	T	T	0	T	T	C	C	C	C	T	C	C	T	T	C	C	C	C	T	T	T	C	C	C	C	C	T	C	C	C	C	C	T	T	C	T	C	C	T	T	C
PZE-101052294	C	C	A	A	C	C	C	C	0	C	C	C	C	C	A	A	C	A	C	C	A	C	C	C	C	C	C	A	A	C	C	C	C	C	A	C	C	C	C	C	A	A	C	C	C	C	A	C	0
	C	C	A	A	C	C	C	C	0	C	C	C	C	C	A	A	C	A	C	C	A	C	C	C	C	C	C	A	A	C	C	C	C	C	A	C	C	C	C	C	A	A	C	C	C	C	A	C	0
PZE-101052635	A	A	A	A	A	A	A	A	A	A	A	A	A	A	A	A	C	A	A	C	A	A	C	C	A	C	A	A	A	A	A	C	A	C	C	C	A	C	C	C	A	A	A	A	A	A	C	A	A
	A	A	A	A	A	A	A	A	A	A	A	A	A	A	A	A	C	A	A	C	A	A	C	C	A	C	A	A	A	A	A	C	A	C	C	C	A	C	C	C	A	A	A	A	A	A	C	A	A
PZE-101052634	T	T	T	T	T	T	T	T	T	T	T	T	T	T	T	T	G	T	T	G	T	T	G	G	T	G	T	T	T	T	T	G	T	G	G	G	T	G	G	G	T	T	T	T	T	T	G	T	T
	T	T	T	T	T	T	T	T	T	T	T	T	T	T	T	T	G	T	T	G	T	T	G	G	T	G	T	T	T	T	T	G	T	G	G	G	T	G	G	G	T	T	T	T	T	T	G	T	T
PZE-101052583	G	G	G	G	G	G	G	G	G	G	G	G	G	G	G	G	G	G	G	G	G	G	G	T	G	G	G	G	G	G	G	T	G	G	G	G	G	G	G	T	G	G	G	G	G	G	G	G	G
	G	G	G	G	G	G	G	G	G	G	G	G	G	G	G	G	G	G	G	G	G	G	G	T	G	G	G	G	G	G	G	T	G	G	G	G	G	G	G	T	G	G	G	G	G	G	G	G	G
PZE-101052580	G	G	G	G	G	G	G	G	G	G	G	G	G	G	G	G	G	G	G	G	G	G	G	A	G	G	G	G	G	G	G	A	G	G	G	G	G	G	G	A	G	G	G	G	G	G	G	G	G
	G	G	G	G	G	G	G	G	G	G	G	G	G	G	G	G	G	G	G	G	G	G	G	A	G	G	G	G	G	G	G	A	G	G	G	G	G	G	G	A	G	G	G	G	G	G	G	G	G
PZE-101052571	A	A	A	A	A	A	A	A	A	A	A	A	A	A	A	A	C	A	A	C	A	A	C	C	A	C	0	A	A	A	A	C	A	C	C	C	A	C	C	A	A	A	A	A	A	A	C	A	A
	A	A	A	A	A	A	A	A	A	A	A	A	A	A	A	A	C	A	A	C	A	A	C	C	A	C	0	A	A	A	A	C	A	C	C	C	A	C	C	A	A	A	A	A	A	A	C	A	A
PZE-101052652	G	G	G	G	G	G	G	G	G	G	G	G	G	G	G	G	A	G	G	A	G	G	A	A	G	A	G	G	G	G	G	A	G	A	A	A	G	A	A	G	G	G	A	G	G	G	A	G	G
	G	G	G	G	G	G	G	G	G	G	G	G	G	G	G	G	A	G	G	A	G	G	A	A	G	A	G	G	G	G	G	A	G	A	A	A	G	A	A	G	G	G	A	G	G	G	A	G	G
PZE-101052660	C	C	C	C	C	C	C	C	C	C	C	C	C	C	C	C	T	C	C	C	C	C	T	C	C	C	C	C	C	C	C	C	C	C	C	C	C	C	T	C	C	C	T	C	C	C	C	C	C
	C	C	C	C	C	C	C	C	C	C	C	C	C	C	C	C	T	C	C	C	C	C	T	C	C	C	C	C	C	C	C	C	C	C	C	C	C	C	T	C	C	C	T	C	C	C	C	C	C
PZE-101052733	G	G	G	G	G	G	T	G	G	T	G	G	G	G	T	T	G	T	G	G	G	G	G	G	G	G	G	T	T	T	G	G	T	T	T	G	G	G	G	T	T	T	G	G	T	T	T	T	G
	G	G	G	G	G	G	T	G	G	T	G	G	G	G	T	T	G	T	G	G	G	G	G	G	G	G	G	T	T	T	G	G	T	T	T	G	G	G	G	T	T	T	G	G	T	T	T	T	G
PZE-101052767	G	G	A	A	A	G	A	G	G	A	0	A	A	G	A	A	A	A	G	A	A	G	A	A	A	A	0	A	A	A	A	A	A	A	A	A	G	A	A	A	A	A	A	A	A	A	A	A	0
	G	G	A	A	A	G	A	G	G	A	0	A	A	G	A	A	A	A	G	A	A	G	A	A	A	A	0	A	A	A	A	A	A	A	A	A	G	A	A	A	A	A	A	A	A	A	A	A	0
PZE-101053027	C	C	C	C	C	C	C	T	C	C	C	C	T	C	C	T	C	T	C	T	C	C	T	0	T	T	0	T	C	C	T	0	C	T	T	T	T	T	T	C	C	C	T	T	0	C	T	C	T
	C	C	C	C	C	C	C	T	C	C	C	C	T	C	C	T	C	T	C	T	C	C	T	0	T	T	0	T	C	C	T	0	C	T	T	T	T	T	T	C	C	C	T	T	0	C	T	C	C
PZE-101053028	G	G	G	G	A	G	G	A	G	G	A	G	A	G	G	A	G	A	G	A	A	G	A	A	A	A	G	A	A	A	A	A	G	A	A	A	A	A	A	G	A	G	A	A	0	A	A	G	0
	G	G	G	G	A	G	G	A	G	G	A	G	A	G	G	A	G	A	G	A	A	G	A	A	A	A	G	A	A	A	A	A	G	A	A	A	A	A	A	G	A	G	A	A	0	A	A	G	0
PZE-101053031	G	G	G	G	G	G	G	A	G	G	G	G	A	G	G	A	G	A	G	A	G	G	A	A	A	A	G	A	G	G	A	0	G	A	A	A	A	A	A	G	G	G	A	A	G	G	A	G	A
	G	G	G	G	G	G	G	A	G	G	G	G	A	G	G	A	G	A	G	A	G	G	A	A	A	A	G	A	G	G	A	0	G	A	A	A	A	A	A	G	G	G	A	A	G	G	A	G	G
PZE-101053053	A	A	A	A	A	A	A	A	A	G	A	A	A	A	A	A	G	A	A	A	A	A	A	A	A	A	A	A	A	A	A	A	A	A	G	A	A	A	G	A	A	A	A	G	A	A	G	A	A
	A	A	A	A	A	A	A	A	A	G	A	A	A	A	A	A	G	A	A	A	A	A	A	A	A	A	A	A	A	A	A	A	A	A	G	A	A	A	G	A	A	A	A	G	A	A	G	A	G
PZE-101053184	A	A	C	A	A	A	A	C	A	C	A	C	A	A	C	C	C	C	A	C	A	A	C	A	C	A	C	C	C	A	A	A	C	C	C	A	C	A	A	A	A	A	C	C	A	A	A	C	A
	A	A	C	A	A	A	A	C	A	C	A	C	A	A	C	C	C	C	A	C	A	A	C	A	C	A	C	C	C	A	A	A	C	C	C	A	C	A	A	A	A	A	C	C	A	A	A	C	C
PZE-101053346	A	A	G	A	A	G	G	A	A	A	G	G	A	A	A	A	G	A	A	A	G	G	G	G	G	G	A	A	A	A	A	G	G	G	G	G	A	G	A	G	A	G	A	G	G	A	A	A	G
	A	A	G	A	A	G	G	A	A	A	G	G	A	A	A	A	G	A	A	A	G	G	G	G	G	G	A	A	A	A	A	G	G	G	G	G	A	G	A	G	A	G	A	G	G	A	A	A	G
PZE-101053360	C	C	C	C	C	C	C	C	C	C	C	C	C	C	C	C	C	C	C	C	C	C	C	C	C	C	C	C	C	C	C	C	C	C	C	C	C	C	C	C	C	C	C	C	C	C	C	C	C
	C	C	C	C	C	C	C	C	C	C	C	C	C	C	C	C	C	C	C	C	C	C	C	C	C	C	C	C	C	C	C	C	C	C	C	C	C	C	C	C	C	C	C	C	C	C	C	C	C
PZE-101053410	G	G	G	G	G	G	G	G	G	G	G	G	G	T	G	G	G	T	G	G	G	G	G	G	G	G	G	G	T	G	T	G	G	T	G	G	G	G	G	G	G	G	G	G	G	G	G	G	G
	G	G	G	G	G	G	G	G	G	G	G	G	G	T	G	G	G	T	G	G	G	G	G	G	G	G	G	G	T	G	T	G	G	T	G	G	G	G	G	G	G	G	G	G	G	G	G	G	G
PZE-101053413	A	A	G	A	A	G	G	A	A	A	G	G	A	G	A	A	G	G	A	G	G	G	G	G	G	G	G	G	G	G	G	G	G	G	G	G	G	A	A	G	G	G	A	G	G	G	G	A	G
	A	A	G	A	A	G	G	A	A	A	G	G	A	G	A	A	G	G	A	G	G	G	G	G	G	G	G	G	G	G	G	G	G	G	G	G	G	A	A	G	G	G	A	G	G	G	G	A	G
PZE-101053418	G	G	G	G	G	G	G	G	G	G	G	G	G	G	G	G	G	G	G	G	G	G	G	G	G	G	G	G	G	G	G	G	G	G	G	G	G	G	G	A	G	A	G	G	G	G	A	G	G
	G	G	G	G	G	G	G	G	G	G	G	G	G	G	G	G	G	G	G	G	G	G	G	G	G	G	G	G	G	G	G	G	G	G	G	G	G	G	G	A	G	A	G	G	G	G	A	G	G
PZE-101053438	C	C	C	T	C	T	T	T	C	C	0	T	C	C	T	C	T	C	C	T	C	T	C	T	T	T	T	C	C	T	C	T	C	C	C	T	T	T	C	T	C	T	C	C	T	T	T	T	T
	C	C	C	T	C	T	T	T	C	C	0	T	C	C	T	C	T	C	C	T	C	T	C	T	T	T	T	C	C	T	C	T	C	C	C	T	T	T	C	T	C	T	C	C	T	T	T	T	T
PZE-101053510	C	C	T	T	C	T	T	T	C	C	T	T	C	T	T	C	T	T	C	T	T	T	T	T	T	T	T	T	T	T	T	T	T	T	T	T	T	T	C	T	T	T	C	T	T	T	T	T	T
	C	C	T	T	C	T	T	T	C	C	T	T	C	T	T	C	T	T	C	T	T	T	T	T	T	T	T	T	T	T	T	T	T	T	T	T	T	T	C	T	T	T	C	T	T	T	T	T	T
PZE-101053504	G	G	C	C	G	C	C	C	G	G	C	C	G	C	C	G	C	C	G	C	C	C	C	C	C	C	C	C	C	C	C	C	C	C	C	C	C	C	G	C	C	C	G	C	C	C	C	C	C
	G	G	C	C	G	C	C	C	G	G	C	C	G	C	C	G	C	C	G	C	C	C	C	C	C	C	C	C	C	C	C	C	C	C	C	C	C	C	G	C	C	C	G	C	C	C	C	C	C
PZE-101053646	G	G	G	G	G	G	G	G	G	G	G	G	G	G	G	G	G	G	G	G	G	G	G	G	G	G	G	G	G	G	G	G	G	G	G	G	G	G	G	G	G	G	G	G	G	G	G	G	G
	G	G	G	G	G	G	G	G	G	G	G	G	G	G	G	G	G	G	G	G	G	G	G	G	G	G	G	G	G	G	G	G	G	G	G	G	G	G	G	G	G	G	G	G	G	G	G	G	G
PZE-101053648	G	G	G	G	G	G	G	G	G	G	G	G	G	G	G	G	G	G	G	G	G	G	G	G	G	G	G	G	G	A	A	G	G	G	G	A	0	G	G	G	G	G	G	G	G	A	G	A	G
	G	G	G	G	G	G	G	G	G	G	G	G	G	G	G	G	G	G	G	G	G	G	G	G	G	G	G	G	G	A	A	G	G	G	G	A	0	G	G	G	G	G	G	G	G	A	G	A	G
PZE-101053657	T	T	T	T	T	T	T	T	T	T	T	T	T	T	T	T	T	T	T	T	T	T	T	T	T	T	T	T	T	T	T	T	T	T	T	C	T	T	T	T	T	T	T	T	T	T	T	C	T
	T	T	T	T	T	T	T	T	T	T	T	T	T	T	T	T	T	T	T	T	T	T	T	T	T	T	T	T	T	T	T	T	T	T	T	C	T	T	T	T	T	T	T	T	T	T	T	C	T
PZE-101053715	C	C	C	C	C	C	C	C	C	C	0	C	C	C	C	C	C	C	C	T	C	T	C	C	T	T	C	C	C	C	C	C	C	C	C	C	C	C	C	C	C	C	C	C	C	C	C	C	C
	C	C	C	C	C	C	C	C	C	C	0	C	C	C	C	C	C	C	C	T	C	T	C	C	T	T	C	C	C	C	C	C	C	C	C	C	C	C	C	C	C	C	C	C	C	C	C	C	C
PZE-101053708	A	A	G	A	A	G	A	A	A	A	G	G	G	A	A	A	A	A	A	G	G	A	G	G	A	A	A	G	G	G	A	G	A	A	G	A	A	A	A	G	G	G	A	G	A	G	G	A	G
	A	A	G	A	A	G	A	A	A	A	G	G	G	A	A	A	A	A	A	G	G	A	G	G	A	A	A	G	G	G	A	G	A	A	G	A	A	A	A	G	G	G	A	G	A	G	G	A	G
PZE-101053696	C	T	C	T	T	C	T	T	T	T	0	T	C	C	C	T	C	C	T	C	C	T	C	C	C	C	T	C	C	T	C	C	C	C	C	C	T	T	T	C	C	C	T	C	C	T	C	C	C
	C	T	C	T	T	C	T	T	T	T	0	T	C	C	C	T	C	C	T	C	C	T	C	C	C	C	T	C	C	T	C	C	C	C	C	C	T	T	T	C	C	C	T	C	C	T	C	C	C
PZE-101053675	C	T	T	T	T	T	C	T	T	T	T	T	T	C	T	T	C	C	T	T	T	T	T	T	C	C	T	T	C	C	C	T	C	C	T	C	T	T	T	T	T	T	T	T	C	C	T	C	T
	C	T	T	T	T	T	C	T	T	T	T	T	T	C	T	T	C	C	T	T	T	T	T	T	C	C	T	T	C	C	C	T	C	C	T	C	T	T	T	T	T	T	T	T	C	C	T	C	T
PZE-101053810	G	A	G	A	A	G	G	G	A	A	G	A	G	G	A	A	G	G	A	G	G	G	G	G	G	G	G	G	G	A	A	G	G	A	G	A	A	G	A	G	G	G	A	G	G	A	G	G	G
	G	A	G	A	A	G	G	G	A	A	G	A	G	G	A	A	G	G	A	G	G	G	G	G	G	G	G	G	G	A	A	G	G	A	G	A	A	G	A	G	G	G	A	G	G	A	G	G	G
PZE-101053822	C	C	C	C	C	C	C	C	C	C	C	C	C	C	C	C	C	C	C	C	C	C	C	C	C	C	C	C	C	T	T	C	C	0	C	T	C	C	C	C	C	C	C	C	C	T	C	C	C
	C	C	C	C	C	C	C	C	C	C	C	C	C	C	C	C	C	C	C	C	C	C	C	C	C	C	C	C	C	T	T	C	C	0	C	T	C	C	C	C	C	C	C	C	C	T	C	C	C
PZE-101053897	G	G	G	G	G	G	G	G	G	G	0	G	G	G	G	G	G	G	G	G	G	A	G	G	A	G	G	G	A	A	G	G	G	G	G	G	G	A	G	G	G	A	G	G	G	A	G	G	G
	G	G	G	G	G	G	G	G	G	G	0	G	G	G	G	G	G	G	G	G	G	A	G	G	A	G	G	G	A	A	G	G	G	G	G	G	G	A	G	G	G	A	G	G	G	A	G	G	G
PZE-101053899	A	C	C	C	C	C	C	A	C	C	0	C	C	A	A	C	A	A	C	A	C	A	C	C	A	A	A	C	A	A	C	C	C	C	C	C	C	A	C	A	C	A	C	C	C	A	C	C	C
	A	C	C	C	C	C	C	A	C	C	0	C	C	A	A	C	A	A	C	A	C	A	C	C	A	A	A	C	A	A	C	C	C	C	C	C	C	A	C	A	C	A	C	C	C	A	C	C	C
PZE-101053919	G	A	G	A	A	G	G	A	A	A	G	G	G	G	G	A	G	G	A	G	G	G	G	A	G	G	A	G	G	G	G	A	G	G	G	G	G	G	A	G	A	G	A	G	A	G	G	G	0
	G	A	G	A	A	G	G	A	A	A	G	G	G	G	G	A	G	G	A	G	G	G	G	A	G	G	A	G	G	G	G	A	G	G	G	G	G	G	A	G	A	G	A	G	A	G	G	G	0
PZE-101053934	G	G	G	G	G	G	G	G	G	G	G	G	G	G	G	G	G	G	A	G	G	G	G	G	G	G	G	G	G	G	G	G	G	G	G	G	G	G	G	G	G	G	G	G	A	G	G	G	G
	G	G	G	G	G	G	G	G	G	G	G	G	G	G	G	G	G	G	A	G	G	G	G	G	G	G	G	G	G	G	G	G	G	G	G	G	G	G	G	G	G	G	G	G	A	G	G	G	G
PZE-101053954	G	T	G	T	T	G	G	G	T	T	G	G	G	G	G	T	G	G	T	G	G	G	G	G	G	G	G	G	G	G	G	G	G	G	G	G	G	G	T	G	T	G	T	G	G	G	G	T	T
	G	T	G	T	T	G	G	G	T	T	G	G	G	G	G	T	G	G	T	G	G	G	G	G	G	G	G	G	G	G	G	G	G	G	G	G	G	G	T	G	T	G	T	G	G	G	G	T	T
PZE-101054047	C	A	C	A	A	C	C	C	A	C	C	C	C	C	A	A	C	C	C	C	C	C	A	A	C	A	C	C	C	C	C	A	C	C	C	A	C	C	C	A	C	C	A	C	C	C	C	C	C
	C	A	C	A	A	C	C	C	A	C	C	C	C	C	A	A	C	C	C	C	C	C	A	A	C	A	C	C	C	C	C	A	C	C	C	A	C	C	C	A	C	C	A	C	C	C	C	C	C
PZE-101054136	0	T	C	T	C	T	T	C	T	C	0	T	T	T	T	C	T	T	T	T	C	C	T	C	C	T	T	T	C	T	T	C	C	T	C	C	T	C	T	C	T	T	T	C	T	T	T	C	0
	0	T	C	T	C	C	T	C	T	C	0	T	T	T	T	C	T	T	T	T	C	C	T	C	C	C	T	T	C	T	T	C	C	T	C	C	T	C	T	C	T	T	T	C	T	T	T	C	0
PZE-101054366	C	C	T	T	C	C	C	T	T	C	C	C	T	C	T	T	C	C	T	C	T	C	C	T	T	T	C	C	T	C	T	T	T	C	T	T	T	T	T	C	T	T	T	C	T	C	T	T	T
	C	C	T	T	C	C	C	T	T	C	C	C	T	C	T	T	C	C	T	C	T	C	C	T	T	T	C	C	T	C	T	T	T	C	T	T	T	T	T	C	T	T	T	C	T	C	T	T	T
PZE-101054371	G	G	G	A	G	G	G	G	A	G	G	G	A	G	G	G	G	G	G	G	G	G	G	G	G	G	G	G	G	G	G	G	G	G	G	G	A	G	G	G	G	G	A	G	G	G	G	G	G
	G	G	G	A	G	G	G	G	A	G	G	G	A	G	G	G	G	G	G	G	G	G	G	G	G	G	G	G	G	G	G	G	G	G	G	G	A	G	G	G	G	G	A	G	G	G	G	G	G
PZE-101054372	G	G	G	G	A	A	G	G	G	G	0	G	G	G	G	G	G	G	G	G	G	G	A	G	G	G	A	G	G	A	G	G	G	A	G	G	G	G	A	G	G	G	G	A	G	A	G	G	G
	G	G	G	G	A	A	G	G	G	G	0	G	G	G	G	G	G	G	G	G	G	G	A	G	G	G	A	G	G	A	G	G	G	A	G	G	G	G	A	G	G	G	G	A	G	A	G	G	G
PZE-101054452	C	C	T	C	T	C	C	T	T	C	0	C	T	C	C	T	C	C	T	T	T	C	T	T	T	C	T	T	T	T	T	T	T	T	T	T	C	T	C	T	T	T	C	T	T	T	C	C	T
	C	C	T	C	T	C	C	T	T	C	0	C	T	C	C	T	C	C	T	T	T	C	T	T	T	C	T	T	T	T	T	T	T	T	T	T	C	T	C	T	T	T	C	T	T	T	C	C	T
PZE-101054457	A	A	A	A	C	C	A	A	0	A	0	A	A	A	C	A	A	A	A	A	A	A	C	C	C	A	A	C	A	C	A	C	C	C	A	C	A	C	C	C	C	C	A	A	C	C	A	C	A
	A	A	A	A	C	C	A	A	0	A	0	A	A	A	C	A	A	A	A	A	A	A	C	C	C	A	A	C	A	C	A	C	C	C	A	C	A	C	C	C	C	C	A	A	C	C	A	C	A
PZE-101054527	T	T	C	T	C	T	T	T	T	T	C	T	C	T	T	T	T	T	C	T	C	T	C	C	C	T	C	T	T	C	T	C	T	T	C	C	T	T	T	T	T	T	T	T	T	C	T	T	C
	T	T	C	T	C	T	T	T	T	T	C	T	C	T	T	T	T	T	C	T	C	T	C	C	C	T	C	T	T	C	T	C	T	T	C	C	T	T	T	T	T	T	T	T	T	C	T	T	C
PZE-101054533	G	G	G	G	G	A	G	A	G	A	G	G	G	G	A	A	A	A	G	A	G	G	G	G	G	A	G	A	A	G	A	G	A	A	G	G	G	A	A	G	A	A	G	G	A	G	G	G	G
	G	G	G	G	G	A	G	A	G	A	G	G	G	G	A	A	A	A	G	A	G	G	G	G	G	A	G	A	A	G	A	G	A	A	G	G	G	A	A	G	A	A	G	G	A	G	G	G	G
PZE-101054561	G	A	G	A	G	G	G	G	A	G	G	A	A	G	G	G	G	G	G	G	G	G	G	G	G	G	G	G	G	G	G	G	G	G	G	A	A	G	G	G	G	G	A	G	G	G	G	G	G
	G	A	G	A	G	G	G	G	A	G	G	A	A	G	G	G	G	G	G	G	G	G	G	G	G	G	G	G	G	G	G	G	G	G	G	A	A	G	G	G	G	G	A	G	G	G	G	G	G
PZE-101054564	T	C	C	C	C	T	T	C	C	C	C	C	C	T	T	C	C	C	C	C	C	C	C	C	C	T	C	T	T	C	T	C	T	T	C	C	C	T	T	C	C	T	C	C	T	C	C	C	C
	T	C	C	C	C	T	T	C	C	C	C	C	C	T	T	C	C	C	C	C	C	C	C	C	C	T	C	T	T	C	T	C	T	T	C	C	C	T	T	C	C	T	C	C	T	C	C	C	C
PZE-101054604	A	A	A	G	G	A	A	A	A	G	G	A	A	A	G	A	G	G	A	A	A	G	G	A	G	G	A	G	A	A	G	A	A	G	A	A	G	A	A	G	A	A	G	A	A	A	G	G	G
	A	A	A	G	G	A	A	A	A	G	G	A	A	A	G	A	G	G	A	A	A	G	G	A	G	G	A	G	A	A	G	A	A	G	A	A	G	A	A	G	A	A	G	A	A	A	G	G	G
PZE-101054617	C	C	C	T	C	C	C	C	C	C	C	C	C	C	T	C	C	C	C	C	C	C	C	C	C	C	C	C	C	C	C	C	C	C	C	C	T	C	C	C	C	C	T	C	C	C	T	C	C
	C	C	C	T	C	C	C	C	C	C	C	C	C	C	T	C	C	C	C	C	C	C	C	C	C	C	C	C	C	C	C	C	C	C	C	C	T	C	C	C	C	C	T	C	C	C	T	C	C
PZE-101054644	T	T	T	T	C	C	T	T	T	T	0	T	T	T	T	T	T	T	T	T	T	T	C	T	C	T	T	T	T	C	T	T	T	C	T	T	T	T	T	T	T	C	T	T	C	C	T	C	C
	T	T	T	T	C	C	T	T	T	T	0	T	T	T	T	T	T	T	T	T	T	T	C	T	C	T	T	T	T	C	T	T	T	C	T	T	T	T	T	T	T	C	T	T	C	C	T	C	C
PZE-101054650	G	G	T	G	G	T	G	T	G	G	G	G	G	G	G	T	T	T	T	T	G	G	G	0	T	G	G	G	T	G	T	0	T	T	G	G	G	G	0	T	G	T	G	0	G	G	G	T	T
	G	G	T	G	G	T	G	T	G	G	G	G	G	G	G	T	T	T	T	T	G	G	G	0	T	G	G	G	T	G	T	0	T	T	G	G	G	G	0	T	G	T	G	0	G	G	G	T	T
PZE-101054681	G	G	A	G	G	G	G	A	G	G	G	G	G	G	A	A	A	A	A	A	G	G	G	G	A	G	G	G	A	A	G	G	G	G	G	G	G	A	G	G	A	A	G	A	A	A	G	A	G
	G	G	A	G	G	G	G	A	G	G	G	G	G	G	A	A	A	A	A	A	G	G	G	G	A	G	G	G	A	A	G	G	G	G	G	G	G	A	G	G	A	A	G	A	A	A	G	A	G
PZE-101055029	T	T	C	T	T	T	T	T	T	T	T	T	T	T	C	T	T	T	C	T	T	T	T	T	T	C	C	C	C	T	C	T	C	T	T	T	T	T	T	T	T	T	T	T	C	T	T	T	0
	T	T	C	T	T	T	T	T	T	T	T	T	T	T	C	T	T	T	C	T	T	T	T	T	T	C	C	C	C	T	C	T	C	C	T	T	T	T	T	T	T	C	T	T	C	T	T	T	0
PZE-101055086	A	G	G	A	G	G	G	G	A	G	G	G	A	A	A	A	G	G	G	G	A	G	G	G	A	G	G	G	A	G	G	G	A	A	G	G	A	G	G	A	G	G	A	A	A	G	G	G	0
	A	G	G	A	G	G	G	G	A	G	G	G	A	A	A	A	G	G	G	G	A	G	G	G	A	G	G	G	A	G	G	G	A	A	G	G	A	G	G	A	G	G	A	A	A	G	G	G	0
PZE-101055099	T	C	C	T	T	C	C	C	T	C	T	C	T	T	T	T	C	C	C	C	T	C	C	C	T	C	C	C	T	C	C	C	T	T	C	C	T	C	C	T	C	C	T	T	T	C	T	T	C
	T	C	C	T	T	C	C	C	T	C	T	C	T	T	T	T	C	C	C	C	T	C	C	C	T	C	C	C	T	C	C	C	T	T	C	C	T	C	C	T	C	C	T	T	T	C	T	T	C
PZE-101055111	G	A	A	G	A	A	A	A	G	A	A	G	G	G	G	G	A	A	A	A	G	0	A	A	G	A	A	A	G	A	A	A	G	G	A	A	G	A	A	G	A	A	G	G	G	A	A	A	0
	G	A	A	G	A	A	A	A	G	A	A	G	G	G	G	G	A	A	A	A	G	0	A	A	G	A	A	A	G	A	A	A	G	G	A	A	G	A	A	G	A	A	G	G	G	A	A	A	0
PZE-101055190	G	A	A	A	A	G	G	A	A	G	A	A	A	A	A	A	A	G	A	A	A	A	A	A	A	A	A	A	G	G	G	A	A	G	G	G	A	A	A	A	G	G	A	A	A	G	A	A	A
	G	A	A	A	A	G	G	A	A	G	A	A	A	A	A	A	A	G	A	A	A	A	A	A	A	A	A	A	G	G	G	A	A	G	G	G	A	A	A	A	G	G	A	A	A	G	A	A	A
PZE-101055223	G	A	A	G	G	A	G	G	G	G	G	G	G	G	A	G	A	G	A	A	G	G	G	G	A	A	A	A	G	A	A	G	A	A	A	G	G	A	A	A	G	G	G	G	A	A	A	A	A
	G	A	A	G	G	A	G	G	G	G	G	G	G	G	A	G	A	G	A	A	G	G	G	G	A	A	A	A	G	A	A	G	A	A	A	G	G	A	A	A	G	G	G	G	A	A	A	A	A
PZE-101055259	T	G	T	T	T	G	T	T	T	T	T	T	G	T	T	T	T	T	T	G	T	T	G	T	T	T	G	T	T	T	T	T	T	G	T	G	T	T	T	T	T	T	T	T	T	T	G	T	T
	T	G	T	T	T	G	T	T	T	T	T	T	G	T	T	T	T	T	T	G	T	T	G	T	T	T	G	T	T	T	T	T	T	G	T	G	T	T	T	T	T	T	T	T	T	T	G	T	T
PZE-101055260	A	A	A	A	A	G	A	A	A	A	A	A	A	A	A	A	A	A	A	A	A	A	A	G	A	A	G	A	A	A	A	G	A	A	A	G	A	A	A	A	A	A	A	A	A	A	G	A	A
	A	A	A	A	A	G	A	A	A	A	A	A	A	A	A	A	A	A	A	A	A	A	A	G	A	A	G	A	A	A	A	G	A	A	A	G	A	A	A	A	A	A	A	A	A	A	G	A	A
PZE-101055327	G	G	G	G	G	G	G	G	G	G	G	G	G	G	G	G	G	G	G	G	G	G	G	G	G	G	G	G	G	G	G	G	G	G	G	G	G	G	G	G	G	A	G	G	A	G	G	A	G
	G	G	G	G	G	G	G	G	G	G	G	G	G	G	G	G	G	G	G	G	G	G	G	G	G	G	G	G	G	G	G	G	G	G	G	G	G	G	G	G	G	A	G	G	A	G	G	A	G
PZE-101055532	A	A	0	A	0	A	A	A	A	A	0	A	A	A	A	A	A	A	0	A	A	A	A	A	G	A	A	A	A	G	A	A	A	A	A	A	A	A	A	A	A	G	A	A	A	G	A	A	G
	A	A	0	A	0	A	A	A	A	A	0	A	A	A	A	A	A	A	0	A	A	A	A	A	G	A	A	A	A	G	A	A	A	A	A	A	A	A	A	A	A	G	A	A	A	G	A	A	G
PZE-101055565	A	A	A	A	G	A	A	A	A	A	A	A	G	A	A	A	A	A	A	A	A	A	A	A	G	G	A	A	A	A	A	A	A	A	A	G	A	G	A	A	A	G	A	A	A	A	A	A	G
	A	A	A	A	G	A	A	A	A	A	A	A	G	A	A	A	A	A	A	A	A	A	A	A	G	G	A	A	A	A	A	A	A	A	G	G	A	G	A	A	A	G	A	A	A	A	A	A	G
PZE-101055712	A	A	C	A	A	A	A	A	A	C	A	A	A	A	C	A	C	A	C	A	A	A	C	A	A	A	A	A	A	A	A	A	A	A	A	A	C	A	A	A	A	A	A	A	A	A	A	A	A
	A	A	C	A	A	A	A	A	A	C	A	A	A	A	C	A	C	A	C	A	A	A	C	A	A	A	A	A	A	A	A	A	A	A	A	A	C	A	A	A	A	A	A	A	A	A	A	A	A
PZE-101055749	C	C	C	C	C	C	C	C	C	C	C	C	C	C	C	C	C	C	C	C	C	C	C	C	C	C	C	G	C	C	G	C	C	G	G	C	G	C	G	G	C	C	C	G	C	C	C	C	C
	C	C	C	C	C	C	C	C	C	C	C	C	C	C	C	C	C	C	C	C	C	C	C	C	C	C	C	G	C	C	G	C	C	G	G	C	G	C	G	G	C	C	C	G	C	C	C	C	C
PZE-101055771	C	T	T	C	T	T	C	T	T	C	T	T	T	C	C	T	C	T	T	T	C	T	T	C	C	T	T	C	T	T	T	C	T	T	C	T	C	C	C	T	T	C	C	C	C	T	T	C	T
	C	T	T	C	T	T	C	T	T	C	T	T	T	C	C	T	C	T	T	T	C	T	T	C	C	T	T	C	T	T	T	C	T	T	C	T	C	C	C	T	T	C	C	C	C	T	T	C	T
PZE-101055774	C	T	T	C	T	T	C	T	0	C	T	T	T	C	C	T	C	T	T	T	C	T	T	C	C	C	T	0	T	T	T	C	T	T	C	T	C	T	C	T	T	T	C	C	C	T	T	C	0
	C	T	T	C	T	T	C	T	0	C	T	T	T	C	C	T	C	T	T	T	C	T	T	C	C	C	T	0	T	T	T	C	T	T	C	T	C	T	C	T	T	T	C	C	C	T	T	C	0
PZE-101055906	C	C	C	C	C	C	C	C	C	C	C	C	C	C	C	C	C	C	C	C	C	C	C	C	C	C	C	C	A	C	C	C	C	C	C	C	C	C	C	C	C	A	C	A	C	C	C	C	C
	C	C	C	C	C	C	C	C	C	C	C	C	C	C	C	C	C	C	C	C	C	C	C	C	C	C	C	C	A	C	C	C	C	C	C	C	C	C	C	C	C	A	C	A	C	C	C	C	C
PZE-101056000	G	G	G	G	A	G	G	A	A	G	0	A	G	G	G	G	G	G	G	G	G	G	G	A	G	G	A	G	A	G	G	A	G	G	G	G	A	G	G	G	G	G	G	A	G	G	G	G	G
	G	G	G	G	A	G	G	A	A	G	0	A	G	G	G	G	G	G	G	G	G	G	G	A	G	G	A	G	A	G	G	A	G	G	G	G	A	G	G	G	G	G	G	A	G	G	G	G	G
PZE-101056007	G	G	A	G	G	G	G	G	G	G	G	G	G	G	G	G	G	G	A	G	A	G	G	G	A	G	G	G	G	A	G	G	A	G	G	G	G	G	G	G	G	G	G	G	G	A	G	G	G
	G	G	A	G	G	G	G	G	G	G	G	G	G	G	G	G	G	G	A	G	A	G	G	G	A	G	G	G	G	A	G	G	A	G	G	G	G	G	G	G	G	G	G	G	G	A	G	G	G
PZE-101056062	T	T	T	T	T	T	T	T	T	T	T	T	T	C	0	T	T	T	T	T	T	T	T	0	T	T	T	T	T	T	T	T	T	T	T	T	T	T	T	T	T	T	C	T	T	T	T	T	T
	T	T	T	T	T	T	T	T	T	T	T	T	T	C	0	T	T	T	T	T	T	T	T	0	T	T	T	T	T	T	T	T	T	T	T	T	T	T	T	T	T	T	C	T	T	T	T	T	T
PZE-101056102	C	C	C	C	C	T	C	C	C	C	C	C	C	C	C	C	C	C	C	C	C	C	C	C	C	C	C	C	T	C	C	C	C	C	C	C	C	C	C	C	C	C	C	T	C	C	C	C	C
	C	C	C	C	C	T	C	C	C	C	C	C	C	C	C	C	C	C	C	C	C	C	C	C	C	C	C	C	T	C	C	C	C	C	C	C	C	C	C	C	C	C	C	T	C	C	C	C	C
PZE-101056156	G	A	A	A	A	G	G	A	A	A	A	A	G	G	A	A	G	G	A	G	A	A	A	A	A	G	G	G	A	A	G	A	A	G	A	A	A	A	G	G	G	A	A	G	A	A	A	A	G
	G	A	A	A	A	G	G	A	A	A	A	A	G	G	A	A	G	G	A	G	A	A	A	A	A	G	G	G	A	A	G	A	A	G	A	A	A	A	G	G	G	A	A	G	A	A	A	A	G
PZE-101056681	G	A	G	G	G	G	G	G	G	G	G	G	G	G	G	G	G	G	G	G	G	G	A	G	A	G	G	G	G	G	A	G	G	A	G	G	G	G	G	G	G	A	G	G	G	G	G	G	A
	G	A	G	G	G	G	G	G	G	G	G	G	G	G	G	G	G	G	G	G	G	G	A	G	A	G	G	G	G	G	A	G	G	A	G	G	G	G	G	G	G	A	G	G	G	G	G	G	A
PZE-101056684	C	A	C	C	C	A	C	C	C	0	A	C	C	C	C	C	C	C	C	C	C	A	A	C	C	C	C	C	C	C	C	C	A	A	A	A	C	A	C	C	C	A	A	C	C	C	C	C	A
	C	A	C	C	C	A	C	C	C	0	A	C	C	C	C	C	C	C	C	C	C	A	A	C	C	C	C	C	C	C	C	C	A	A	A	A	C	A	C	C	C	A	A	C	C	C	C	C	C
PZE-101056687	A	G	A	A	A	G	A	A	A	G	G	A	A	A	A	A	A	A	A	A	A	G	G	A	A	A	A	A	A	A	A	A	G	G	G	G	A	G	A	A	A	G	G	A	A	A	A	A	G
	A	G	A	A	A	G	A	A	A	G	G	A	A	A	A	A	A	A	A	A	A	G	G	A	A	A	A	A	A	A	A	A	G	G	G	G	A	G	A	A	A	G	G	A	A	A	A	A	G
PZE-101056856	G	G	A	G	G	G	A	G	G	G	G	A	A	G	G	G	A	G	A	G	G	G	G	G	A	G	A	G	A	A	G	G	A	G	G	G	G	G	G	A	G	G	G	A	G	A	G	G	0
	G	G	A	G	G	G	A	G	G	G	G	A	A	G	G	G	A	G	A	G	G	G	G	G	A	G	A	G	A	A	G	G	A	G	G	G	G	G	G	A	G	G	G	A	G	A	G	G	0
PZE-101056999	T	T	T	T	T	T	T	T	T	T	T	T	T	T	T	T	T	T	T	T	T	T	T	T	T	T	T	T	T	T	T	T	C	C	T	T	T	C	T	T	T	C	T	T	C	T	C	C	C
	T	T	T	T	T	T	T	T	T	T	T	T	T	T	T	T	T	T	T	T	T	T	T	T	T	T	T	T	T	T	T	T	C	C	T	T	T	C	T	T	T	C	T	T	C	T	C	C	C
PZE-101057000	G	T	G	G	G	G	G	T	T	G	G	G	T	T	T	T	G	T	G	T	G	G	G	T	T	G	T	T	G	T	G	T	T	T	T	G	T	T	G	T	G	T	G	G	T	T	T	T	0
	G	T	G	G	G	G	G	T	T	G	G	G	T	T	T	T	G	T	G	T	G	G	G	T	T	G	T	T	G	T	G	T	T	T	T	G	T	T	G	T	G	T	G	G	T	T	T	T	0
PZE-101057030	T	0	T	T	T	T	0	0	0	0	T	T	T	T	0	0	0	T	T	T	T	T	T	T	T	T	T	T	T	T	T	T	T	T	T	T	0	0	0	C	T	T	0	T	T	T	C	T	T
	T	0	T	T	T	T	0	0	0	0	T	T	T	T	0	0	0	T	T	T	T	T	T	T	T	T	T	T	T	T	T	T	T	T	T	T	0	0	0	C	T	T	0	T	T	T	C	T	T
PZE-101057141	G	G	G	G	G	G	T	T	G	T	G	G	G	T	T	T	T	G	G	G	G	G	G	G	G	G	G	G	G	G	G	G	G	G	T	G	G	G	T	G	G	T	G	G	G	G	T	G	G
	G	G	G	G	G	G	T	T	G	T	G	G	G	T	T	T	T	G	G	G	G	G	G	G	G	G	G	G	G	G	G	G	G	G	T	G	G	G	T	G	G	T	G	G	G	G	T	G	G
PZE-101057190	A	C	A	A	A	A	A	A	A	A	A	A	A	A	A	A	A	A	A	A	A	A	A	A	A	A	A	A	A	A	A	A	A	A	A	A	C	A	A	A	A	A	C	A	A	A	C	A	A
	A	C	A	A	A	A	A	A	A	A	A	A	A	A	A	A	A	A	A	A	A	A	A	A	A	A	A	A	A	A	A	A	A	A	A	A	C	A	A	A	A	A	C	A	A	A	C	A	A
PZE-101057232	A	A	A	A	G	G	A	A	A	A	0	A	G	G	A	A	A	A	A	G	A	A	G	A	A	A	G	A	A	A	G	A	A	A	A	A	A	A	A	A	A	A	A	A	A	A	A	A	A
	A	A	A	A	G	G	A	A	A	A	0	A	G	G	A	A	A	A	A	G	A	A	G	A	A	A	G	A	A	A	G	A	A	A	A	A	A	A	A	A	A	A	A	A	A	A	A	A	A
PZE-101057252	G	G	G	G	G	G	G	G	G	G	G	G	G	G	G	G	G	G	G	G	G	G	G	G	G	G	G	G	G	G	G	G	G	G	A	G	G	G	G	G	G	G	G	G	G	G	G	G	G
	G	G	G	G	G	G	G	G	G	G	G	G	G	G	G	G	G	G	G	G	G	G	G	G	G	G	G	G	G	G	G	G	G	G	A	G	G	G	G	G	G	G	G	G	G	G	G	G	G
PZE-101057532	C	A	0	C	C	C	C	C	C	C	C	C	C	C	C	C	C	C	C	C	A	C	C	C	C	C	C	C	C	C	C	C	C	C	C	C	C	C	C	C	C	C	A	A	C	C	A	C	C
	C	A	0	C	C	C	C	C	C	C	C	C	C	C	C	C	C	C	C	C	A	C	C	C	C	C	C	C	C	C	C	C	C	C	C	C	C	C	C	C	C	C	A	A	C	C	A	C	C
PZE-101057783	C	C	C	C	C	C	C	C	C	C	C	C	C	C	C	C	C	C	C	C	C	C	C	C	C	C	T	C	C	C	C	C	0	C	C	C	C	C	C	C	T	C	C	C	C	C	C	C	C
	C	C	C	C	C	C	C	C	C	C	C	C	C	C	C	C	C	C	C	C	C	C	C	C	C	C	T	C	C	C	C	C	0	C	C	C	C	C	C	C	T	C	C	C	C	C	C	C	C
PZE-101057910	A	A	C	C	C	C	A	C	C	A	C	C	C	A	C	C	A	A	C	C	C	C	C	A	C	C	C	C	A	A	C	A	C	C	C	C	A	C	A	C	C	C	C	C	C	A	C	C	C
	C	C	C	C	C	C	C	C	C	C	C	C	C	C	C	C	C	C	C	C	C	C	C	C	C	C	C	C	C	C	C	C	C	C	C	C	C	C	A	C	C	C	C	C	C	C	C	C	C
PZE-101057950	C	C	C	C	C	C	T	C	C	C	0	C	C	0	C	C	0	0	C	0	T	C	T	T	T	C	0	C	C	T	C	T	C	C	T	C	C	C	0	C	C	C	C	C	C	T	C	C	C
	C	C	C	C	C	C	T	C	C	C	0	C	C	0	C	C	0	0	C	0	T	C	T	T	C	C	0	C	C	T	C	T	C	C	T	C	C	C	0	C	C	C	C	C	C	T	C	C	C
PZE-101057994	C	C	0	C	T	C	T	C	T	C	T	T	C	T	C	C	T	T	C	T	T	0	T	T	C	C	T	C	C	T	C	T	T	C	0	C	C	C	C	C	C	C	T	C	C	T	C	C	T
	C	C	0	C	T	C	T	C	T	C	T	T	C	T	C	C	T	T	C	T	T	0	T	T	C	C	T	C	C	T	C	T	T	C	0	C	C	C	C	C	C	C	T	C	C	T	C	C	T
PZE-101058154	G	A	G	A	G	G	G	A	A	G	A	G	G	G	A	A	G	G	G	G	G	G	A	A	G	A	G	A	G	A	A	A	A	G	A	A	G	A	G	G	A	G	G	A	G	A	G	G	G
	G	A	G	A	G	G	G	A	A	G	A	G	G	G	A	A	G	G	G	G	G	G	A	A	G	A	G	A	G	A	A	A	A	G	A	A	G	A	G	G	A	G	G	A	G	A	G	G	G
PZE-101058157	C	T	C	T	C	C	C	T	T	C	0	C	C	C	T	T	C	C	C	C	C	C	T	C	C	T	C	T	C	T	T	C	T	C	T	T	C	T	C	C	T	C	C	T	C	T	C	C	C
	C	T	C	T	C	C	C	T	T	C	0	C	C	C	T	T	C	C	C	C	C	C	T	C	C	T	C	T	C	T	T	C	T	C	T	T	C	T	C	C	T	C	C	T	C	T	C	C	C
PZE-101058205	G	G	0	G	G	G	G	G	G	G	G	A	A	G	G	G	G	G	A	A	G	G	G	G	G	G	G	G	G	G	G	G	G	G	G	G	G	G	G	A	G	G	G	G	A	G	A	A	G
	G	G	0	G	G	G	G	G	G	G	G	A	A	G	G	G	G	G	A	A	G	G	G	G	G	G	G	G	G	G	G	G	G	G	G	G	G	G	G	A	G	G	G	G	A	G	A	A	G
PZE-101058210	G	A	G	A	G	G	G	A	0	G	0	G	G	G	A	A	G	G	G	G	G	G	A	A	G	A	G	A	G	A	A	A	A	G	A	A	G	A	G	G	A	G	G	A	G	A	G	G	G
	G	A	G	A	G	G	G	A	0	G	0	G	G	G	A	A	G	G	G	G	G	G	A	A	G	A	G	A	G	A	A	A	A	G	A	A	G	A	G	G	A	G	G	A	G	A	G	G	G
PZE-101058273	T	T	0	T	C	T	T	T	C	T	0	T	T	C	C	C	C	C	T	T	C	C	T	T	T	T	C	C	C	T	T	T	T	T	C	C	T	C	T	T	C	T	C	C	T	T	C	T	0
	T	T	0	T	C	T	T	T	C	T	0	T	T	C	C	C	C	C	T	T	C	C	T	T	T	T	C	C	C	T	T	T	T	T	C	C	T	C	T	T	C	T	C	C	T	T	C	T	0
PZE-101058274	0	T	0	T	T	T	T	T	T	0	0	T	T	T	T	T	T	T	T	T	C	C	T	T	C	T	C	C	T	T	T	T	T	T	C	C	0	C	0	T	C	T	T	C	T	T	C	T	C
	0	T	0	T	T	T	T	T	T	0	0	T	T	T	T	T	T	T	T	T	C	C	T	T	C	T	C	C	T	T	T	T	T	T	C	C	0	C	0	T	C	T	T	C	T	T	C	T	C
PZE-101058277	T	T	T	T	C	T	T	T	C	T	T	T	T	C	C	C	C	C	T	T	T	T	T	T	T	T	T	T	C	T	T	T	T	T	T	T	T	T	T	T	T	T	C	T	T	T	T	T	T
	T	T	T	T	C	T	T	T	C	T	T	T	T	C	C	C	C	C	T	T	T	T	T	T	T	T	T	T	C	T	T	T	T	T	T	T	T	T	T	T	T	T	C	T	T	T	T	T	T
PZE-101058290	A	A	A	A	A	A	A	A	A	A	A	A	A	A	A	A	A	A	A	A	A	A	A	A	A	A	A	G	A	A	A	A	A	A	A	G	A	A	A	A	G	A	A	A	A	A	A	A	A
	A	A	A	A	A	A	A	A	A	A	A	A	A	A	A	A	A	A	A	A	A	A	A	A	A	A	A	G	A	A	A	A	A	A	A	G	A	A	A	A	G	A	A	A	A	A	A	A	A
PZE-101058310	G	G	G	G	G	G	T	G	G	G	G	T	G	T	G	G	T	T	G	G	G	G	G	G	G	G	0	T	T	G	G	G	G	G	G	T	G	T	G	G	T	G	G	G	G	G	G	G	G
	G	G	G	G	G	G	T	G	G	G	G	T	G	T	G	G	T	T	G	G	G	G	G	G	G	G	0	T	T	G	G	G	G	G	G	T	G	T	G	G	T	G	G	G	G	G	G	G	G
PZE-101058312	G	A	0	A	G	G	G	A	G	G	G	G	G	G	G	G	G	G	G	G	G	G	G	G	G	A	G	G	G	A	G	G	A	G	G	G	G	G	G	A	G	A	A	A	G	A	G	G	G
	G	A	0	A	G	G	G	A	G	G	G	G	G	G	G	G	G	G	G	G	G	G	G	G	G	A	G	G	G	A	G	G	A	G	G	G	G	G	G	A	G	A	A	A	G	A	G	G	G
PZE-101058322	G	A	0	A	G	G	A	A	G	G	0	G	G	A	G	G	A	A	G	A	G	G	A	A	A	A	G	G	A	A	G	A	A	A	G	A	G	G	G	A	G	A	A	A	A	A	G	A	G
	G	A	0	A	G	G	A	A	G	G	0	G	G	A	G	G	A	A	G	A	G	G	A	A	A	A	G	G	A	A	G	A	A	A	G	A	G	G	G	A	G	A	A	A	A	A	G	A	G
PZE-101058333	C	T	0	T	C	C	C	T	C	C	C	C	C	C	C	C	C	C	C	C	C	C	C	C	C	T	C	C	C	T	C	C	T	C	C	C	C	C	C	T	C	T	T	T	C	T	C	C	C
	C	T	0	T	C	C	C	T	C	C	C	C	C	C	C	C	C	C	C	C	C	C	C	C	C	T	C	C	C	T	C	C	T	C	C	C	C	C	C	T	C	T	T	T	C	T	C	C	C
PZE-101058372	G	A	G	A	G	G	G	A	G	G	G	G	G	G	G	G	G	G	G	G	G	G	G	G	G	A	A	G	A	G	A	G	A	G	G	A	G	G	G	G	G	A	G	G	G	G	G	G	G
	G	A	G	A	G	G	G	A	G	G	G	G	G	G	G	G	G	G	G	G	G	G	G	G	G	A	A	G	A	G	A	G	A	G	G	A	G	G	G	G	G	A	G	G	G	G	G	G	G
PZE-101058496	G	G	G	G	G	G	G	G	0	G	G	G	G	G	G	G	G	G	G	G	G	G	G	G	G	G	G	A	A	G	G	G	G	G	G	G	G	G	G	G	A	G	G	G	G	G	G	G	G
	G	G	G	G	G	G	G	G	0	G	G	G	G	G	G	G	G	G	G	G	G	G	G	G	G	G	G	A	A	G	G	G	G	G	G	G	G	G	G	G	A	G	G	G	G	G	G	G	G
PZE-101058520	C	C	C	C	C	C	C	C	C	C	C	C	C	C	C	C	C	C	C	C	C	C	C	C	T	C	C	C	C	C	C	C	0	C	0	C	C	C	C	C	C	C	C	C	T	C	C	T	C
	C	C	C	C	C	C	C	C	C	C	C	C	C	C	C	C	C	C	C	C	C	C	C	C	T	C	C	C	C	C	C	C	0	C	0	C	C	C	C	C	C	C	C	C	T	C	C	T	C
PZE-101058806	A	G	G	G	G	G	G	G	G	G	G	G	A	G	G	G	G	G	G	G	A	G	G	G	A	G	G	G	A	A	G	G	G	A	A	G	A	A	A	G	A	G	G	G	G	A	G	G	G
	A	G	G	G	G	G	G	G	G	G	G	G	A	G	G	G	G	G	G	G	A	G	G	G	A	G	G	G	A	A	G	G	G	A	A	G	A	A	A	G	A	G	G	G	G	A	G	G	G
PZE-101058897	G	G	T	G	T	T	G	G	G	G	G	G	G	G	G	G	G	G	T	G	G	G	G	G	G	G	G	G	G	G	G	G	G	0	G	G	G	G	G	G	T	G	G	G	G	G	0	G	T
	G	G	T	G	T	T	G	G	G	G	G	G	G	G	G	G	G	G	T	G	G	G	G	G	G	G	G	G	G	G	G	G	G	0	G	G	G	G	G	G	T	G	G	G	G	G	0	G	T
PZE-101059068	T	T	T	C	C	T	T	T	C	T	C	T	C	T	C	T	T	T	T	C	C	T	T	C	T	T	T	T	T	T	C	C	C	T	T	C	T	T	T	C	T	T	C	T	C	T	T	C	C
	T	T	T	C	C	T	T	T	C	T	C	T	C	T	C	T	T	T	T	C	C	T	T	C	T	T	T	T	T	T	C	C	C	T	T	C	T	T	T	C	T	T	C	T	C	T	T	C	C
PZE-101059072	T	T	0	T	C	T	T	T	C	T	C	T	C	T	C	T	T	T	T	C	C	T	T	C	T	T	T	T	T	T	C	C	C	T	T	C	T	T	T	C	T	T	T	T	C	T	T	C	T
	T	T	0	T	C	T	T	T	C	T	C	T	C	T	C	T	T	T	T	C	C	T	T	C	T	T	T	T	T	T	C	C	C	T	T	C	T	T	T	C	T	T	T	T	C	T	T	C	T
PZE-101059129	T	C	0	T	C	C	C	0	0	0	0	T	C	T	T	C	T	C	T	C	C	T	C	C	C	C	C	T	T	T	C	C	C	C	C	C	T	C	T	C	T	C	T	T	C	T	C	C	T
	T	C	0	T	C	C	C	0	0	0	0	T	C	T	T	C	T	C	T	C	C	T	C	C	C	C	C	T	T	T	C	C	C	C	C	C	T	C	T	C	T	C	T	T	C	T	C	C	T
PZE-101059325	A	A	0	A	C	A	A	A	0	A	0	C	A	C	A	A	C	A	A	C	C	C	A	A	A	A	A	C	A	A	C	A	A	A	A	A	A	C	A	A	C	A	A	C	C	A	C	C	A
	A	A	0	A	C	A	A	A	0	A	0	C	A	C	A	A	C	A	A	C	C	C	A	A	A	A	A	C	A	A	C	A	A	A	A	A	A	C	A	A	C	A	A	C	C	A	C	C	A
PZE-101059434	T	C	T	C	T	T	C	T	0	C	C	T	C	0	C	C	0	T	T	T	T	0	C	C	C	T	T	T	0	T	C	C	T	T	C	T	T	C	T	C	T	C	C	T	T	T	T	T	T
	T	C	T	C	T	T	C	T	0	C	C	T	C	0	C	C	0	T	T	T	T	0	C	C	C	T	T	T	0	T	C	C	T	T	C	T	T	C	T	C	T	C	C	T	T	T	T	T	T
PZE-101059495	A	G	0	A	G	G	G	A	A	G	A	G	A	A	G	G	A	A	G	A	G	A	A	A	A	G	G	A	G	G	A	A	A	G	A	G	A	A	A	A	G	A	G	G	G	G	A	G	G
	A	G	0	A	G	G	G	A	A	G	A	G	A	A	G	G	A	A	G	A	G	A	A	A	A	G	G	A	G	G	A	A	A	G	A	G	A	A	A	A	G	A	G	G	G	G	A	G	G
PZE-101059783	C	T	0	T	T	T	T	C	T	T	0	C	C	T	T	T	C	T	C	T	T	T	C	T	T	T	T	T	C	T	C	T	C	T	T	C	T	C	T	C	T	T	T	T	C	T	T	C	C
	C	T	0	T	T	T	T	C	T	T	0	C	C	T	T	T	C	T	C	T	T	T	C	T	T	T	T	T	C	T	C	T	C	T	T	C	T	C	T	C	T	T	T	T	C	T	T	C	C
PZE-101059784	G	A	0	A	A	A	A	G	A	A	G	G	G	A	A	A	G	A	G	A	A	A	G	A	A	A	A	A	G	A	G	A	G	A	A	G	A	G	A	G	A	A	A	A	G	A	A	G	G
	G	A	0	A	A	A	A	G	A	A	G	G	G	A	A	A	G	A	G	A	A	A	G	A	A	A	A	A	G	A	G	A	G	A	A	G	A	G	A	G	A	A	A	A	G	A	A	G	G
PZE-101059816	G	T	G	G	G	G	T	G	T	T	0	G	G	G	T	G	G	G	G	G	G	T	G	G	G	G	G	G	G	T	G	G	T	T	T	T	T	G	T	G	G	G	T	T	G	T	G	G	G
	G	T	G	G	G	G	T	G	T	T	0	G	G	G	T	G	G	G	G	G	G	T	G	G	G	G	G	G	G	T	G	G	T	T	T	T	T	G	T	G	G	G	T	T	G	T	G	G	G
PZE-101060218	C	C	C	C	C	C	C	T	C	C	T	T	C	C	C	C	C	T	C	C	T	T	C	T	T	C	C	T	T	C	T	T	C	T	C	T	T	C	C	C	C	C	C	C	T	C	C	T	C
	C	C	C	C	C	C	C	T	C	C	T	T	C	C	C	C	C	T	C	C	T	T	C	T	T	C	C	T	T	C	T	T	C	T	C	T	T	C	C	C	C	C	C	C	T	C	C	T	C
PZE-101060224	C	T	C	T	C	C	C	C	T	C	C	C	T	T	C	C	T	T	C	T	C	C	C	C	C	C	T	C	C	T	C	C	C	C	T	C	C	C	T	C	C	C	T	C	C	T	C	C	C
	C	T	C	T	C	C	C	C	T	C	C	C	T	T	C	C	T	T	C	T	C	C	C	C	C	C	T	C	C	T	C	C	C	C	T	C	C	C	T	C	C	C	T	C	C	T	C	C	C
PZE-101060251	G	G	G	G	G	T	T	G	T	G	G	G	G	G	G	G	T	G	G	T	G	G	G	G	G	T	G	G	G	G	T	G	T	G	G	G	G	G	G	G	G	G	T	G	G	G	G	G	G
	G	G	G	G	G	T	T	G	T	G	G	G	G	G	G	G	T	G	G	T	G	G	G	G	G	T	G	G	G	G	T	G	T	G	G	G	G	G	G	G	G	G	T	G	G	G	G	G	G
PZE-101060254	C	C	C	T	C	C	C	C	C	C	C	C	T	C	C	C	C	T	C	T	0	C	T	C	T	T	T	T	T	T	T	C	T	0	T	T	C	C	T	T	C	T	C	C	C	T	0	C	0
	C	C	C	T	C	C	C	C	C	C	C	C	T	C	C	C	C	T	C	T	0	C	T	C	T	T	T	T	T	T	T	C	T	0	T	T	C	C	T	T	C	T	C	C	C	T	0	C	0
PZE-101060288	G	G	G	G	G	A	G	G	G	G	G	G	A	G	G	G	G	G	G	G	G	G	G	G	G	G	G	0	G	G	G	G	G	G	G	G	G	A	G	G	G	A	G	G	A	G	G	A	G
	G	G	G	G	G	A	G	G	G	G	G	G	A	G	G	G	G	G	G	G	G	G	G	G	G	G	G	0	G	G	G	G	G	G	G	G	G	A	G	G	G	A	G	G	A	G	G	A	G
PZE-101060289	G	G	G	G	G	T	G	G	G	G	G	G	T	G	G	G	G	G	G	G	G	G	G	G	G	G	G	G	G	G	G	G	G	G	G	G	G	T	G	G	G	G	G	G	T	G	G	T	G
	G	G	G	G	G	T	G	G	G	G	G	G	T	G	G	G	G	G	G	G	G	G	G	G	G	G	G	G	G	G	G	G	G	G	G	G	G	T	G	G	G	G	G	G	T	G	G	T	G
PZE-101060303	G	A	G	G	A	A	G	G	0	G	A	G	A	G	A	G	G	G	A	A	G	A	G	A	G	0	0	A	G	G	G	A	0	G	G	G	G	A	G	G	G	G	G	A	A	G	G	A	0
	G	A	G	G	A	A	G	G	0	G	A	G	A	G	A	G	G	G	A	A	G	A	G	A	G	0	0	A	G	G	G	A	0	G	G	G	G	A	G	G	G	G	G	A	A	G	G	A	0
PZE-101060630	A	A	A	G	A	A	A	A	A	G	A	G	A	G	A	A	A	G	A	A	A	A	G	G	G	G	A	A	G	A	G	G	A	A	A	G	G	G	G	A	A	G	G	A	A	A	A	A	0
	A	A	A	G	A	A	A	A	A	G	A	G	A	G	A	A	A	G	A	A	A	A	G	G	G	G	A	A	G	A	G	G	A	A	A	G	G	G	G	A	A	G	G	A	A	A	A	A	0
PZE-101060785	A	A	G	G	G	G	A	A	G	G	A	G	G	G	A	A	A	G	A	G	G	A	G	G	G	G	G	G	G	G	G	G	G	G	G	G	G	G	G	G	G	G	G	G	A	G	G	G	G
	A	A	G	G	G	G	A	A	G	G	A	G	G	G	A	A	A	G	A	G	G	A	G	G	G	G	G	G	G	G	G	G	G	G	G	G	G	G	G	G	G	G	G	G	A	G	G	G	G
PZE-101060788	C	C	T	T	C	C	C	C	T	T	C	T	T	T	C	C	C	C	C	C	T	C	C	C	C	C	T	T	C	C	C	C	C	C	C	C	T	C	T	C	T	C	T	T	C	C	C	C	C
	C	C	T	T	C	C	C	C	T	T	C	T	T	T	C	C	C	C	C	C	T	C	C	C	C	C	T	T	C	C	C	C	C	C	C	C	T	C	T	C	T	C	T	T	C	C	C	C	C
PZE-101060841	G	G	G	G	A	A	G	G	G	G	G	G	G	G	G	G	G	A	G	A	G	G	A	A	A	A	G	G	A	A	A	A	A	A	A	A	G	A	G	A	G	A	G	G	G	A	A	A	A
	G	G	G	G	A	A	G	G	G	G	G	G	G	G	G	G	G	A	G	A	G	G	A	A	A	A	G	G	A	A	A	A	A	A	A	A	G	A	G	A	G	A	G	G	G	A	A	A	A
PZE-101060842	C	C	C	C	A	A	C	C	C	C	C	C	C	C	C	C	C	A	C	A	C	C	A	A	0	A	C	C	A	A	0	A	A	A	A	A	C	A	C	A	C	A	C	C	C	A	A	A	A
	C	C	C	C	A	A	C	C	C	C	C	C	C	C	C	C	C	A	C	A	C	C	A	A	0	A	C	C	A	A	0	A	A	A	A	A	C	A	C	A	C	A	C	C	C	A	A	A	A
PZE-101060930	A	A	0	A	A	A	A	A	A	A	A	A	C	0	A	A	A	C	A	A	C	A	A	A	C	C	A	A	A	A	C	A	A	A	A	A	0	A	0	A	A	A	0	A	A	A	C	A	A
	A	A	0	A	A	A	A	A	A	A	A	A	C	0	A	A	A	C	A	A	C	A	A	A	C	C	A	A	A	A	C	A	A	A	A	A	0	A	0	A	A	A	0	A	A	A	C	A	A
PZE-101061035	A	C	0	C	A	A	C	C	A	A	C	A	A	A	C	C	C	A	C	A	A	C	C	A	A	A	C	A	A	A	A	A	A	A	A	A	A	A	A	C	C	A	A	A	A	A	C	A	A
	A	C	0	C	A	A	C	C	A	A	C	A	A	A	C	C	C	A	C	A	A	C	C	A	A	A	C	A	A	A	A	A	A	A	A	A	A	A	A	C	C	A	A	A	A	A	C	A	A
PZE-101061064	G	G	G	A	G	G	G	A	G	A	G	A	G	A	G	G	G	G	G	A	G	G	A	G	A	G	A	G	G	G	A	G	A	A	G	G	A	G	A	G	G	G	A	G	G	G	A	G	A
	G	G	G	A	G	G	G	A	G	A	G	A	G	A	G	G	G	G	G	A	G	G	A	G	A	G	A	G	G	G	A	G	A	A	G	G	A	G	A	G	G	G	A	G	G	G	A	G	A
PZE-101061114	A	G	G	0	G	G	A	0	A	0	A	0	G	0	G	G	A	0	G	A	G	A	A	0	A	0	G	A	A	A	A	0	A	A	A	A	0	0	0	A	G	G	0	G	G	A	A	G	A
	A	G	G	0	G	G	A	0	A	0	A	0	G	0	G	G	A	0	G	A	G	A	A	0	A	0	G	A	A	A	A	0	A	A	A	A	0	0	0	A	G	G	0	G	G	A	A	G	A
PZE-101061168	A	A	A	A	T	T	T	A	A	A	0	A	A	A	A	A	T	A	A	A	A	A	T	A	T	A	A	T	A	T	T	A	T	T	A	T	A	A	A	T	T	A	A	T	T	T	T	A	T
	A	A	A	A	T	T	T	A	A	A	0	A	A	A	A	A	T	A	A	A	A	A	T	A	T	A	A	T	A	T	T	A	T	T	A	T	A	A	A	T	T	A	A	T	T	T	T	A	T
PZE-101061225	G	T	T	G	G	T	G	T	T	G	G	G	T	T	T	G	G	G	T	G	T	G	T	G	G	G	G	G	G	G	G	G	G	G	T	G	T	T	T	G	G	T	T	T	G	G	T	G	G
	G	T	T	G	G	T	G	T	T	G	G	G	T	T	T	G	G	G	T	G	T	G	T	G	G	G	G	G	G	G	G	G	G	G	T	G	T	T	T	G	G	T	T	T	G	G	T	G	G
PZE-101061587	G	A	G	A	A	G	A	A	G	G	0	G	A	A	G	A	A	A	G	A	A	G	A	A	G	A	G	G	A	A	G	A	A	A	G	G	A	A	A	A	G	A	G	G	A	A	A	A	A
	G	A	G	A	A	G	A	A	G	G	0	G	A	A	G	A	A	A	G	A	A	G	A	A	G	A	G	G	A	A	G	A	A	A	G	G	A	A	A	A	G	A	G	G	A	A	A	A	A
PZE-101061930	A	C	A	A	A	A	A	A	A	A	A	A	A	A	C	A	A	C	A	A	A	A	A	A	A	C	A	A	A	A	A	A	A	A	A	C	A	A	C	C	A	A	A	A	A	A	A	A	0
	A	C	A	A	A	A	A	A	A	A	A	A	A	A	C	A	A	C	A	A	A	A	A	A	A	C	A	A	A	A	A	A	A	A	A	C	A	A	C	C	A	A	A	A	A	A	A	A	0
PZE-101062009	A	A	C	C	C	C	C	A	C	C	0	C	C	A	C	C	A	A	C	C	C	C	C	C	C	A	A	A	A	A	C	C	C	C	C	C	C	A	A	C	C	C	C	C	C	A	A	C	C
	A	A	C	C	C	C	C	A	C	C	0	C	C	A	C	C	A	A	C	C	C	C	C	C	C	A	A	A	A	A	C	C	C	C	C	C	C	A	A	C	C	C	C	C	C	A	A	C	C
PZE-101062072	T	T	0	C	T	C	T	T	T	T	0	T	C	T	T	C	T	T	0	C	T	C	C	C	0	T	T	T	T	T	0	0	C	0	T	T	T	T	T	T	T	T	T	C	T	T	T	T	C
	T	T	0	C	T	C	T	T	T	T	0	T	C	T	T	C	T	T	0	C	T	C	C	C	0	T	T	T	T	T	0	0	C	0	T	T	T	T	T	T	T	T	T	C	T	T	T	T	C
PZE-101062090	A	A	G	A	A	A	G	A	A	G	A	G	A	A	A	A	A	A	G	G	A	A	A	G	A	A	A	A	G	A	A	A	G	A	0	G	A	A	A	A	A	G	G	A	A	A	A	A	A
	A	A	G	A	A	A	G	A	A	G	A	G	A	A	A	A	A	A	G	G	A	A	A	G	A	A	A	A	G	A	A	A	G	A	0	G	A	A	A	A	A	G	G	A	A	A	A	A	A
PZE-101062213	T	T	C	T	T	T	C	T	C	T	T	T	T	T	T	T	T	T	C	T	T	T	T	C	C	T	T	C	T	T	C	T	T	C	T	T	C	T	T	T	T	T	C	T	T	T	T	T	T
	T	T	C	T	T	T	C	T	C	T	T	T	T	T	T	T	T	T	C	T	T	T	T	C	C	T	T	C	T	T	C	T	T	C	T	T	C	T	T	T	T	T	C	T	T	T	T	T	T
PZE-101062246	C	C	0	C	T	T	0	C	0	C	0	T	C	C	C	C	C	C	0	T	T	C	C	C	T	C	C	C	C	C	T	0	C	T	T	C	0	C	T	T	C	C	0	T	C	C	C	C	C
	C	C	0	C	T	T	0	C	0	C	0	T	C	C	C	C	C	C	0	T	T	C	C	C	T	C	C	C	C	C	T	0	C	T	T	C	0	C	T	T	C	C	0	T	C	C	C	C	C
PZE-101062331	C	C	C	C	C	C	C	C	C	C	C	C	C	C	C	C	C	C	C	C	C	C	T	C	C	C	C	C	T	T	C	T	C	C	C	C	C	T	C	C	C	C	C	C	T	T	0	T	C
	C	C	C	C	C	C	C	C	C	C	C	C	C	C	C	C	C	C	C	C	C	C	T	C	C	C	C	C	T	T	C	T	C	C	C	C	C	T	C	C	C	C	C	C	T	T	0	T	C
PZE-101062642	G	A	G	G	G	A	A	A	G	G	G	G	G	A	G	G	A	G	G	A	G	A	G	A	A	A	G	A	A	A	A	A	A	A	A	A	G	A	A	A	A	A	G	A	A	A	A	A	A
	G	A	G	G	G	A	A	A	G	G	G	G	G	A	G	G	A	G	G	A	G	A	G	A	A	A	G	A	A	A	A	A	A	A	A	A	G	A	A	A	A	A	G	A	A	A	A	A	A
PZE-101062764	A	A	A	A	A	A	A	G	A	A	0	A	A	G	A	A	A	A	A	G	A	G	A	A	A	A	A	A	A	A	A	A	A	A	A	A	A	A	A	A	A	A	A	A	A	A	A	A	A
	A	A	A	A	A	A	A	G	A	A	0	A	A	G	A	A	A	A	A	G	A	G	A	A	A	A	A	A	A	A	A	A	A	A	A	A	A	A	A	A	A	A	A	A	A	A	A	A	A
PZE-101062737	A	A	A	A	A	A	A	G	A	G	A	A	A	G	A	A	G	A	A	A	A	A	A	A	A	G	A	A	G	A	A	G	A	G	A	G	G	A	A	A	A	G	A	A	G	A	G	A	G
	A	A	A	A	A	A	A	G	A	G	A	A	A	G	A	A	G	A	A	A	A	A	A	A	A	G	A	A	G	A	A	G	A	G	A	G	G	A	A	A	A	G	A	A	G	A	G	A	G
PZE-101062857	G	A	0	G	A	A	G	G	G	A	0	A	G	G	G	G	A	G	G	G	A	G	A	A	G	A	A	G	A	G	G	A	G	A	A	A	A	A	G	A	G	A	A	A	A	G	A	A	A
	G	A	0	G	A	A	G	G	G	A	0	A	G	G	G	G	A	G	G	G	A	G	A	A	G	A	A	G	A	G	G	A	G	A	A	A	A	A	G	A	G	A	A	A	A	G	A	A	A
PZE-101062825	G	G	A	A	G	G	G	G	0	G	G	G	A	G	A	A	A	G	A	G	G	G	A	A	A	A	0	A	A	G	A	A	G	A	G	A	G	A	A	0	G	A	G	G	0	G	A	0	0
	G	G	A	A	G	G	G	G	0	G	G	G	A	G	A	A	A	G	A	G	G	G	A	A	A	A	0	A	A	G	A	A	G	A	G	A	G	A	A	0	G	A	G	G	0	G	G	0	0
PZE-101063113	C	C	0	C	A	C	C	A	C	C	A	A	C	A	A	C	C	A	A	A	A	A	C	A	A	A	C	A	C	A	A	C	A	A	A	A	A	A	A	A	A	A	C	A	A	A	A	C	C
	C	C	0	C	A	C	C	A	C	C	A	A	C	A	A	C	C	A	A	A	A	A	C	A	A	A	C	A	C	A	A	C	A	A	A	A	A	A	A	A	A	A	C	A	A	A	A	C	C
PZE-101063074	A	A	A	A	A	A	A	A	A	A	A	G	A	A	A	A	A	A	A	A	A	A	A	G	A	A	A	A	A	A	A	A	A	A	A	A	G	A	A	G	G	A	A	A	A	A	A	A	A
	A	A	A	A	A	A	A	A	A	A	A	G	A	A	A	A	A	A	A	A	A	A	A	G	A	A	A	A	A	A	A	A	A	A	A	A	G	A	A	G	G	A	A	A	A	A	A	A	A
PZE-101063036	G	G	G	G	G	G	G	G	G	G	0	A	G	G	G	G	G	G	G	A	G	A	G	G	A	A	G	G	G	G	A	A	G	A	A	A	A	G	G	A	G	A	G	G	A	G	A	A	G
	G	G	G	G	G	G	G	G	G	G	0	A	G	G	G	G	G	G	G	A	G	A	G	G	A	A	G	G	G	G	A	A	G	A	A	A	A	G	G	A	G	A	G	G	A	G	A	A	G
PZE-101063002	C	C	C	T	C	T	C	C	C	C	C	C	T	C	C	C	C	C	C	C	C	C	C	T	C	C	C	C	C	C	C	C	C	T	T	C	C	C	C	C	C	C	C	C	C	C	C	C	C
	C	C	C	T	C	T	C	C	C	C	C	C	T	C	C	C	C	C	C	C	C	C	C	T	C	C	C	C	C	C	C	C	C	T	T	C	C	C	C	C	C	C	C	C	C	C	C	C	C
PZE-101062970	A	A	A	A	A	A	C	C	A	A	A	A	A	C	A	A	A	C	A	C	A	A	A	A	A	A	0	A	A	A	A	C	C	A	C	C	A	A	A	C	A	A	A	A	C	A	A	A	A
	A	A	A	A	A	A	C	C	A	A	A	A	A	C	A	A	A	C	A	C	A	A	A	A	A	A	0	A	A	A	A	C	C	A	C	C	A	A	A	C	A	A	A	A	C	A	A	A	A
PZE-101063225	C	C	C	C	C	C	C	C	C	C	C	C	C	C	C	C	C	C	C	T	C	C	C	C	C	C	C	C	T	C	C	C	C	C	T	T	C	C	C	T	C	C	C	C	C	C	C	C	C
	C	C	C	C	C	C	C	C	C	C	C	C	C	C	C	C	C	C	C	T	C	C	C	C	C	C	C	C	T	C	C	C	C	C	T	T	C	C	C	T	C	C	C	C	C	C	C	C	C
PZE-101063271	0	C	C	T	C	T	C	C	T	T	C	C	T	C	T	T	0	T	C	T	C	C	C	0	T	C	C	T	T	0	T	C	C	0	T	T	C	T	T	T	C	C	T	C	T	0	0	T	C
	0	C	C	T	C	T	C	C	T	T	C	C	T	C	T	T	0	T	C	T	C	C	C	0	T	C	C	T	T	0	T	C	C	0	T	T	C	T	T	T	C	C	T	C	T	0	0	T	C
PZE-101063282	0	A	A	A	A	A	A	A	A	A	A	A	A	A	A	A	0	A	A	G	A	A	A	0	G	A	A	A	A	0	G	A	A	0	A	G	A	A	A	A	A	A	A	A	A	0	0	G	A
	0	A	A	A	A	A	A	A	A	A	A	A	A	A	A	A	0	A	A	G	A	A	A	0	G	A	A	A	A	0	G	A	A	0	A	G	A	A	A	A	A	A	A	A	A	0	0	G	A
PZE-101063328	A	A	C	A	C	A	C	C	A	A	C	A	C	C	A	0	A	A	C	C	C	C	C	C	A	C	C	C	A	C	A	A	A	A	C	A	A	A	C	C	C	A	A	C	0	C	A	C	C
	A	A	C	A	C	A	C	C	A	A	C	A	C	C	A	0	A	A	C	C	C	C	C	C	A	C	C	C	A	C	A	A	A	A	C	A	A	A	C	C	C	A	A	C	0	C	A	C	C
PZE-101063406	T	T	T	T	T	T	T	T	T	T	T	T	T	T	T	T	T	T	T	T	T	T	C	T	T	T	T	T	T	T	T	T	T	T	T	T	T	T	T	T	T	T	T	T	T	T	T	T	T
	T	T	T	T	T	T	T	T	T	T	T	T	T	T	T	T	T	T	T	T	T	T	C	T	T	T	T	T	T	T	T	T	T	T	T	T	T	T	T	T	T	T	T	T	T	T	T	T	T
PZE-101063527	C	C	0	A	C	C	C	C	C	C	C	C	C	C	C	C	C	C	C	C	C	C	C	C	C	C	C	C	C	C	C	C	C	C	C	A	A	C	C	C	C	C	C	C	C	C	C	C	C
	C	C	0	A	C	C	C	C	C	C	C	C	C	C	C	C	C	C	C	C	C	C	C	C	C	C	C	C	C	C	C	C	C	C	C	A	A	C	C	C	C	C	C	C	C	C	C	C	C
PZE-101063539	C	C	C	C	C	C	C	C	C	C	C	T	C	C	C	C	C	C	C	C	C	C	C	C	C	C	C	C	T	C	C	C	C	C	C	T	C	C	C	C	C	C	C	C	C	C	C	C	C
	C	C	C	C	C	C	C	C	C	C	C	T	C	C	C	C	C	C	C	C	C	C	C	C	C	C	C	C	T	C	C	C	C	C	C	T	C	C	C	C	C	C	C	C	C	C	C	C	C
PZE-101063665	T	C	T	C	C	0	C	C	C	C	0	C	T	C	T	C	C	C	T	T	C	T	T	0	C	T	C	C	C	C	C	0	C	C	C	C	C	C	T	T	C	C	C	C	C	C	T	T	C
	T	C	T	C	C	0	C	C	C	C	0	C	T	C	T	C	C	C	T	T	C	T	T	0	C	T	C	C	C	C	C	0	C	C	C	C	C	C	T	T	C	C	C	C	C	C	T	T	C
PZE-101064305	C	C	C	C	C	C	C	C	C	C	C	C	C	C	C	C	C	C	C	C	C	C	C	C	C	C	C	C	C	C	T	C	C	C	C	C	C	C	C	C	C	C	C	C	C	C	C	C	C
	C	C	C	C	C	C	C	C	C	C	C	C	C	C	C	C	C	C	C	C	C	C	C	C	C	C	C	C	C	C	T	C	C	C	C	C	C	C	C	C	C	C	C	C	C	C	C	C	C
PZE-101064331	C	T	T	T	T	T	C	T	C	T	0	T	T	T	C	T	T	T	T	T	T	C	C	T	T	T	T	T	T	T	T	C	T	T	T	T	T	T	T	T	T	T	C	T	T	T	T	T	C
	C	T	T	T	T	T	C	T	C	T	0	T	T	T	C	T	T	T	T	T	T	C	C	T	T	T	T	T	T	T	T	C	T	T	T	T	T	T	T	T	T	T	C	T	T	T	T	T	C
PZE-101064334	A	A	A	A	A	A	A	A	A	A	A	A	A	0	A	A	A	0	A	A	A	A	0	A	A	0	A	C	A	0	A	A	C	A	0	0	A	A	A	0	C	C	A	A	A	0	C	C	A
	A	A	A	A	A	A	A	A	A	A	A	A	A	0	A	A	A	0	A	A	A	A	0	A	A	0	A	C	A	0	A	A	C	A	0	0	A	A	A	0	C	C	A	A	A	0	C	C	A
PZE-101064370	A	A	A	A	A	A	A	A	A	A	A	A	A	A	A	A	A	A	A	A	A	A	A	A	A	A	A	G	A	G	A	A	G	A	A	A	A	A	A	A	G	G	A	A	A	G	G	G	A
	A	A	A	A	A	A	A	A	A	A	A	A	A	A	A	A	A	A	A	A	A	A	A	A	A	A	A	G	A	G	A	A	G	A	A	A	A	A	A	A	G	G	A	A	A	G	G	G	A
PZE-101064372	A	A	A	A	A	A	G	A	G	A	0	A	A	A	G	A	A	A	A	A	A	G	A	A	A	A	A	A	G	A	A	A	A	A	A	A	A	A	A	A	A	A	G	A	A	A	A	A	G
	A	A	A	A	A	A	G	A	G	A	0	A	A	A	G	A	A	A	A	A	A	G	A	A	A	A	A	A	G	A	A	A	A	A	A	A	A	A	A	A	A	A	G	A	A	A	A	A	G
PZE-101064448	G	G	G	G	G	G	A	G	A	G	G	G	G	A	A	G	G	G	G	A	G	A	G	G	G	G	G	G	G	G	A	G	G	G	G	G	A	G	G	G	G	G	A	G	G	G	G	G	A
	G	G	G	G	G	G	A	G	A	G	G	G	G	A	A	G	G	G	G	A	G	A	G	G	G	G	G	G	G	G	A	G	G	G	G	G	A	G	G	G	G	G	A	G	G	G	G	G	A
PZE-101064465	T	T	T	T	T	T	C	T	C	T	0	T	T	T	C	T	T	T	T	0	T	C	T	T	T	T	T	T	T	T	T	T	T	T	T	T	T	T	T	T	T	T	C	T	T	T	T	T	C
	T	T	T	T	T	T	C	T	C	T	0	T	T	T	C	T	T	T	T	0	T	C	T	T	T	T	T	T	T	T	T	T	T	T	T	T	T	T	T	T	T	T	C	T	T	T	T	T	C
PZE-101064466	T	T	G	T	G	G	T	T	T	T	0	T	G	T	T	T	T	G	G	G	G	T	T	G	G	T	G	G	G	G	T	G	G	T	T	T	T	G	T	T	G	G	T	G	G	G	G	G	T
	T	T	G	T	G	G	T	T	T	T	0	T	G	T	T	T	T	G	G	G	G	T	T	G	G	T	G	G	G	G	T	G	G	T	T	T	T	G	T	T	G	G	T	G	G	G	G	G	T
PZE-101064477	A	C	A	C	A	A	C	A	C	A	0	C	A	A	C	A	C	C	A	C	A	C	A	C	C	A	0	A	C	A	A	C	C	A	A	A	C	C	A	A	A	A	C	A	C	A	C	A	C
	A	C	A	C	A	A	C	A	C	A	0	C	A	A	C	A	C	C	A	C	A	C	A	C	C	A	0	A	C	A	A	C	C	A	A	A	C	C	A	A	A	A	C	A	C	A	C	A	C
PZE-101064479	A	G	A	G	A	A	G	A	G	A	A	G	A	A	G	A	G	G	A	G	A	G	A	A	G	A	A	A	G	A	A	G	G	A	A	A	G	G	A	A	A	A	G	A	G	A	G	A	G
	A	G	A	G	A	A	G	A	G	A	A	G	A	A	G	A	G	G	A	G	A	G	A	A	G	A	A	A	G	A	A	G	G	A	A	A	G	G	A	A	A	A	G	A	G	A	G	A	G
PZE-101064527	C	C	C	C	C	C	A	C	A	C	0	C	C	C	A	C	A	A	C	C	C	A	C	C	C	C	C	C	A	C	C	A	C	C	C	C	C	C	C	C	C	C	A	C	C	C	A	C	A
	C	C	C	C	C	C	A	C	A	C	0	C	C	C	A	C	A	A	C	C	C	A	C	C	C	C	C	C	A	C	C	A	C	C	C	C	C	C	C	C	C	C	A	C	C	C	A	C	A
PZE-101064619	G	G	A	G	A	A	A	G	0	G	A	G	A	G	G	G	G	A	A	G	A	A	A	G	G	G	A	G	A	0	A	G	A	G	A	G	G	G	A	A	G	G	A	A	G	0	A	G	A
	G	G	A	G	A	A	A	G	0	G	A	G	A	G	G	G	G	A	A	G	A	A	A	G	G	G	A	G	A	0	A	G	A	G	A	G	G	G	A	A	G	G	A	A	G	0	A	G	A
PZE-101064634	T	C	C	C	C	C	C	C	C	T	C	C	C	T	C	T	T	C	C	C	C	C	C	C	T	T	C	C	C	T	C	C	C	T	C	T	C	T	C	C	C	T	C	C	T	T	C	C	C
	T	C	C	C	C	C	C	C	C	T	C	C	C	T	C	T	T	C	C	C	C	C	C	C	T	T	C	C	C	T	C	C	C	T	C	T	C	T	C	C	C	T	C	C	T	T	C	C	C
PZE-101064724	G	G	A	G	A	A	A	G	A	A	A	G	A	A	G	A	A	A	A	G	A	A	A	G	G	G	A	A	A	G	G	A	G	G	A	G	G	G	A	A	A	G	A	A	G	G	G	A	A
	G	G	A	G	A	A	A	G	A	A	A	G	A	A	G	A	A	A	A	G	A	A	A	G	G	G	A	A	A	G	G	A	G	G	A	G	G	G	A	A	A	G	A	A	G	G	G	A	A
PZE-101064790	A	C	A	C	A	A	C	C	C	C	0	C	A	C	C	C	C	C	A	C	A	C	C	C	C	C	A	C	C	C	C	C	C	A	C	C	C	C	C	C	C	C	C	A	C	C	C	C	C
	A	C	A	C	A	A	C	C	C	C	0	C	A	C	C	C	C	C	A	C	A	C	C	C	C	C	A	C	C	C	C	C	C	A	C	C	C	C	C	C	C	C	C	A	C	C	C	C	C
PZE-101064766	G	A	G	A	G	G	G	A	G	A	G	A	G	A	G	A	A	G	G	G	G	G	A	A	G	A	G	A	A	G	G	G	A	G	G	G	A	G	A	G	A	A	G	G	G	G	A	A	G
	G	A	G	A	G	G	G	A	G	A	G	A	G	A	G	A	A	G	G	G	G	G	A	A	G	A	G	A	A	G	G	G	A	G	G	G	A	G	A	G	A	A	G	G	G	G	A	A	G
PZE-101064875	G	A	A	A	A	A	G	A	G	A	0	A	A	A	A	A	A	A	A	A	A	G	A	A	A	A	A	A	A	A	A	A	A	G	G	A	A	A	A	A	A	A	A	A	A	A	A	A	G
	G	A	A	A	A	A	G	A	G	A	0	A	A	A	A	A	A	A	A	A	A	G	A	A	A	A	A	A	A	A	A	A	A	G	G	A	A	A	A	A	A	A	A	A	A	A	A	A	G
PZE-101064805	A	A	A	A	A	A	0	A	0	A	A	A	A	A	A	0	A	G	A	G	A	0	G	0	A	A	A	A	G	A	G	G	0	G	0	A	A	A	A	A	A	G	0	A	G	A	A	G	0
	A	A	A	A	A	A	0	A	0	A	A	A	A	A	A	0	A	G	A	G	A	0	G	0	A	A	A	A	G	A	G	G	0	G	0	A	A	A	A	A	A	G	0	A	G	A	A	G	0
PZE-101064865	C	C	A	C	C	A	C	C	C	C	0	C	A	C	C	C	C	C	A	C	A	C	C	C	C	C	A	C	C	C	C	C	C	C	C	C	C	C	C	C	C	A	C	A	A	C	C	C	C
	C	C	A	C	C	A	C	C	C	C	0	C	A	C	C	C	C	C	A	C	A	C	C	C	C	C	A	C	C	C	C	C	C	C	C	C	C	C	C	C	C	A	C	A	A	C	C	C	C
PZE-101064883	G	G	A	G	G	A	G	G	G	G	A	G	A	G	G	G	G	G	A	G	A	A	G	G	G	G	A	G	G	G	G	G	G	A	G	G	G	G	G	G	G	A	G	A	G	G	G	G	G
	G	G	A	G	G	A	G	G	G	G	A	G	A	G	G	G	G	G	A	G	A	A	G	G	G	G	A	G	G	G	G	G	G	A	G	G	G	G	G	G	G	A	G	A	G	G	G	G	G
PZE-101064893	C	C	T	C	C	T	C	C	C	C	T	C	T	C	C	C	C	C	T	C	T	T	C	C	C	C	T	C	C	C	C	C	C	T	C	C	C	C	C	C	C	T	C	T	C	C	C	C	C
	C	C	T	C	C	T	C	C	C	C	T	C	T	C	C	C	C	C	T	C	T	T	C	C	C	C	T	C	C	C	C	C	C	T	C	C	C	C	C	C	C	T	C	T	C	C	C	C	C
PZE-101064994	A	A	A	A	A	A	G	A	G	A	A	A	A	A	A	A	G	A	A	A	A	A	A	A	A	A	A	A	A	A	A	G	A	A	G	A	G	A	A	A	A	A	G	A	A	A	A	A	A
	A	A	A	A	A	A	G	A	G	A	A	A	A	A	A	A	G	A	A	A	A	A	A	A	A	A	A	A	A	A	A	G	A	A	G	A	G	A	A	A	A	A	G	A	A	A	A	A	A
PZE-101065040	C	C	C	C	C	C	T	C	T	C	C	C	C	T	T	C	T	C	C	C	C	C	C	C	C	C	C	C	C	C	C	T	C	C	T	C	C	C	C	C	C	C	T	C	C	C	C	C	C
	C	C	C	C	C	C	T	C	T	C	C	C	C	T	T	C	T	C	C	C	C	C	C	C	C	C	C	C	C	C	C	T	C	C	T	C	C	C	C	C	C	C	T	C	C	C	C	C	C
PZE-101065086	0	C	T	C	C	C	C	C	C	C	C	C	C	C	C	C	C	C	T	C	T	C	C	T	0	C	C	C	T	C	C	T	T	C	C	C	C	C	C	C	C	C	0	C	C	C	C	C	C
	0	C	T	C	C	C	C	C	C	C	C	C	C	C	C	C	C	C	T	C	T	C	C	T	0	C	C	C	T	C	C	T	T	C	C	C	C	C	C	C	C	C	0	C	C	C	C	C	C
PZE-101065132	T	T	T	T	T	T	C	T	C	C	T	T	T	T	T	T	C	T	T	T	T	T	T	T	T	T	T	T	T	T	T	C	T	T	C	T	T	T	T	T	T	T	C	T	T	T	T	T	T
	T	T	T	T	T	T	C	T	C	C	T	T	T	T	T	T	C	T	T	T	T	T	T	T	T	T	T	T	T	T	T	C	T	T	C	T	T	T	T	T	T	T	C	T	T	T	T	T	T
PZE-101065183	T	T	0	0	C	T	T	T	T	T	C	T	T	T	T	T	T	T	T	T	C	C	T	T	T	T	C	0	T	T	T	C	T	T	C	T	T	T	T	T	T	T	C	C	T	T	T	T	C
	T	T	0	0	C	T	T	T	T	T	C	T	T	T	T	T	T	T	T	T	C	C	T	T	T	T	C	0	T	T	T	C	T	T	C	T	T	T	T	T	T	T	C	C	T	T	T	T	C
PZE-101065262	G	T	0	T	G	G	G	T	G	G	G	G	T	T	G	T	G	T	T	T	G	G	T	T	T	T	G	T	T	T	T	G	T	T	G	T	T	T	T	0	T	T	G	G	T	T	T	T	G
	G	T	0	T	G	G	G	T	G	G	G	G	T	T	G	T	G	T	T	T	G	G	T	T	T	T	G	T	T	T	T	G	T	T	G	T	T	T	T	0	T	T	G	G	T	T	T	T	G
PZE-101065552	G	T	G	T	0	T	T	T	0	G	G	G	G	G	G	T	T	T	0	T	0	G	G	T	0	G	G	T	G	0	G	T	T	T	G	T	G	G	T	T	0	T	G	G	T	G	T	T	G
	G	T	G	T	0	T	T	T	0	G	G	G	G	G	G	T	T	T	0	T	0	G	G	T	0	G	G	T	G	0	G	T	T	T	G	T	G	G	T	T	0	T	G	G	T	G	T	T	G
PZE-101065651	A	G	A	A	A	A	G	A	G	G	A	A	G	G	A	G	A	A	A	A	A	A	G	A	A	A	A	A	A	A	A	A	A	A	A	A	A	A	A	A	G	A	G	G	G	G	G	G	G
	A	G	A	A	A	A	G	A	G	G	A	A	G	G	A	G	A	A	A	A	A	A	G	A	A	A	A	A	A	A	A	A	A	A	A	A	A	A	A	A	G	A	G	G	G	G	G	G	G
PZE-101065728	C	A	A	A	A	C	C	A	C	C	C	A	C	A	A	A	A	C	A	A	C	C	A	C	C	A	C	A	C	C	A	C	C	A	C	A	C	A	C	A	A	C	C	A	C	A	C	C	C
	C	A	A	A	A	C	C	A	C	C	C	A	C	A	A	A	A	C	A	A	C	C	A	C	C	A	C	A	C	C	A	C	C	A	C	A	C	A	C	A	A	C	C	A	C	A	C	C	C
PZE-101065758	G	G	A	G	G	G	G	G	A	A	A	G	G	A	G	G	G	G	A	G	G	G	G	G	G	A	A	G	G	G	G	G	G	G	G	0	G	G	G	A	G	G	A	A	G	G	G	G	G
	G	G	A	G	G	G	G	G	A	A	A	G	G	A	G	G	G	G	A	G	G	G	G	G	G	A	A	G	G	G	G	G	G	G	G	0	G	G	G	A	G	G	A	A	G	G	G	G	G
PZE-101065761	T	C	T	T	T	T	T	T	T	T	T	T	T	T	T	C	T	T	T	T	T	T	T	T	T	T	T	T	T	T	T	T	T	T	T	0	T	T	T	T	C	T	T	T	T	C	T	C	T
	T	C	T	T	T	T	T	T	T	T	T	T	T	T	T	C	T	T	T	T	T	T	T	T	T	T	T	T	T	T	T	T	T	T	T	0	T	T	T	T	C	T	T	T	T	C	T	C	T
PZE-101066134	A	A	A	A	A	A	A	A	A	A	A	A	A	A	A	A	A	A	A	A	A	A	A	A	A	A	A	A	A	A	A	A	G	A	A	A	A	A	A	A	A	A	A	A	A	A	A	A	A
	A	A	A	A	A	A	A	A	A	A	A	A	A	A	A	A	A	A	A	A	A	A	A	A	A	A	A	A	A	A	A	A	G	A	A	A	A	A	A	A	A	A	A	A	A	A	A	A	A
PZE-101066217	0	C	A	C	C	C	C	C	C	C	A	C	C	C	C	C	C	C	A	C	A	A	C	C	C	C	C	A	C	A	C	C	0	C	C	C	C	C	C	C	C	C	0	A	C	C	C	C	C
	0	C	A	C	C	C	C	C	C	C	A	C	C	C	C	C	C	C	A	C	A	A	C	C	C	C	C	A	C	A	C	C	0	C	C	C	C	C	C	C	C	C	0	A	C	C	C	C	C
PZE-101066271	C	T	T	T	T	T	C	C	T	C	T	C	T	T	C	C	C	C	T	T	T	T	T	T	T	T	T	T	T	T	T	C	C	T	T	T	T	T	T	T	C	T	T	T	T	C	T	C	T
	C	T	T	T	T	T	C	C	T	C	T	C	T	T	C	C	C	C	T	T	T	T	T	T	T	T	T	T	T	T	T	C	C	T	T	T	T	T	T	T	C	T	T	T	T	C	T	C	T
PZE-101066275	A	G	G	G	G	G	A	A	G	G	G	A	G	G	A	A	G	A	G	A	G	G	G	G	G	G	G	G	G	G	G	A	A	G	G	G	G	G	G	G	A	G	G	G	G	A	G	A	G
	A	G	G	G	G	G	A	A	G	G	G	A	G	G	A	A	G	A	G	A	G	G	G	G	G	G	G	G	G	G	G	A	A	G	G	G	G	G	G	G	A	G	G	G	G	A	G	A	G
PZE-101066291	G	A	0	A	A	A	A	G	A	A	G	G	A	A	G	A	A	A	A	A	G	G	A	A	A	A	G	A	A	G	A	G	A	A	G	A	A	A	G	A	A	A	A	A	A	G	A	A	A
	G	A	0	A	A	A	A	G	A	A	G	G	A	A	G	A	A	A	A	A	G	G	A	A	A	A	G	A	A	G	A	G	A	A	G	A	A	A	G	A	A	A	A	A	A	G	A	A	A
PZE-101066317	C	C	C	C	C	C	C	C	C	C	A	C	C	C	C	C	C	C	C	C	A	A	C	C	C	C	C	C	C	A	C	C	C	C	C	C	C	C	C	C	C	C	C	C	C	C	C	C	C
	C	C	C	C	C	C	C	C	C	C	A	C	C	C	C	C	C	C	C	C	A	A	C	C	C	C	C	C	C	A	C	C	C	C	C	C	C	C	C	C	C	C	C	C	C	C	C	C	C
PZE-101066357	T	T	T	T	T	T	T	T	T	T	C	T	T	T	T	T	T	T	T	T	C	C	T	T	T	T	T	T	T	C	T	T	T	T	T	T	T	T	T	T	T	T	T	T	T	T	T	T	T
	T	T	T	T	T	T	T	T	T	T	C	T	T	T	T	T	T	T	T	T	C	C	T	T	T	T	T	T	T	C	T	T	T	T	T	T	T	T	T	T	T	T	T	T	T	T	T	T	T
PZE-101066379	T	T	T	T	T	T	T	T	T	T	G	T	T	T	T	T	T	T	T	T	G	G	T	T	T	T	T	T	T	G	T	T	T	T	T	T	T	T	T	T	T	T	T	T	T	T	T	T	T
	T	T	T	T	T	T	T	T	T	T	G	T	T	T	T	T	T	T	T	T	G	G	T	T	T	T	T	T	T	G	T	T	T	T	T	T	T	T	T	T	T	T	T	T	T	T	T	T	T
PZE-101066401	A	C	0	C	C	C	C	C	C	C	C	C	C	C	C	C	C	C	C	C	C	C	C	C	C	C	C	C	C	C	C	C	C	C	A	C	C	C	C	C	C	C	C	C	C	C	C	C	C
	A	C	0	C	C	C	C	C	C	C	C	C	C	C	C	C	C	C	C	C	C	C	C	C	C	C	C	C	C	C	C	C	C	C	A	C	C	C	C	C	C	C	C	C	C	C	C	C	C
PZE-101066402	C	T	0	T	T	T	T	T	T	T	T	T	T	T	T	T	T	T	T	T	T	T	T	C	T	C	C	T	T	T	T	C	T	T	C	T	T	T	T	T	T	T	T	T	T	T	T	T	T
	C	T	0	T	T	T	T	T	T	T	T	T	T	T	T	T	T	T	T	T	T	T	T	C	T	C	C	T	T	T	T	C	T	T	C	T	T	T	T	T	T	T	T	T	T	T	T	T	T
PZE-101066403	G	A	0	A	A	A	A	A	A	A	A	A	A	A	A	A	A	A	A	A	A	A	A	G	A	G	G	A	A	A	A	G	A	A	G	A	A	A	A	A	A	A	A	A	A	A	A	A	A
	G	A	0	A	A	A	A	A	A	A	A	A	A	A	A	A	A	A	A	A	A	A	A	G	A	G	G	A	A	A	A	G	A	A	G	A	A	A	A	A	A	A	A	A	A	A	A	A	A
PZE-101066420	G	A	0	A	A	A	A	A	A	A	A	A	A	A	A	A	A	A	A	A	A	A	A	G	A	G	G	A	A	A	A	G	A	A	G	A	A	A	G	A	A	A	A	A	A	G	A	A	A
	G	A	0	A	A	A	A	A	A	A	A	A	A	A	A	A	A	A	A	A	A	A	A	G	A	G	G	A	A	A	A	G	A	A	G	A	A	A	G	A	A	A	A	A	A	G	A	A	A
PZE-101066462	C	T	0	C	T	C	T	T	C	T	T	T	T	T	T	T	T	T	T	T	T	T	T	T	T	T	C	T	T	T	T	C	T	T	C	T	T	T	T	T	T	T	T	T	T	T	T	T	T
	C	T	0	C	T	C	T	T	C	T	T	T	T	T	T	T	T	T	T	T	T	T	T	T	T	T	C	T	T	T	T	C	T	T	C	T	T	T	T	T	T	T	T	T	T	T	T	T	T
PZE-101066477	G	G	G	G	G	G	G	G	G	G	G	G	G	G	G	G	G	G	G	G	G	G	G	A	G	A	G	G	G	G	G	G	G	G	G	G	G	G	G	G	G	G	G	G	G	G	G	G	G
	G	G	G	G	G	G	G	G	G	G	G	G	G	G	G	G	G	G	G	G	G	G	G	A	G	A	G	G	G	G	G	G	G	G	G	G	G	G	G	G	G	G	G	G	G	G	G	G	G
PZE-101066486	A	A	A	A	A	A	A	A	A	A	A	A	A	A	A	A	A	A	A	A	A	A	A	G	A	G	A	A	A	A	A	A	A	A	A	A	A	A	A	A	A	A	A	A	A	A	A	A	A
	A	A	A	A	A	A	A	A	A	A	A	A	A	A	A	A	A	A	A	A	A	A	A	G	A	G	A	A	A	A	A	A	A	A	A	A	A	A	A	A	A	A	A	A	A	A	A	A	A
PZE-101066497	G	T	0	G	T	G	T	T	G	T	T	T	T	T	T	T	T	T	T	T	T	T	T	G	T	G	G	T	T	T	T	G	T	T	G	T	T	T	T	T	T	T	T	T	T	T	T	T	T
	G	T	0	G	T	G	T	T	G	T	T	T	T	T	T	T	T	T	T	T	T	T	T	G	T	G	G	T	T	T	T	G	T	T	G	T	T	T	T	T	T	T	T	T	T	T	T	T	T
PZE-101066505	A	G	0	A	G	A	G	G	A	G	G	G	G	G	G	G	G	G	G	G	G	G	G	G	G	G	A	G	G	G	G	A	G	G	A	G	G	G	G	G	G	G	G	G	G	G	G	G	G
	A	G	0	A	G	A	G	G	A	G	G	G	G	G	G	G	G	G	G	G	G	G	G	G	G	G	A	G	G	G	G	A	G	G	A	G	G	G	G	G	G	G	G	G	G	G	G	G	G
PZE-101066516	C	T	0	C	T	C	T	C	C	T	T	C	T	T	C	T	T	T	T	T	T	T	T	T	T	T	C	T	T	T	T	C	T	T	C	T	T	T	T	T	T	T	T	T	T	T	T	T	T
	C	T	0	C	T	C	T	C	C	T	T	C	T	T	C	T	T	T	T	T	T	T	T	T	T	T	C	T	T	T	T	C	T	T	C	T	T	T	T	T	T	T	T	T	T	T	T	T	T
PZE-101066537	T	G	0	T	G	T	G	G	T	G	G	G	G	G	G	G	G	G	G	G	G	G	G	G	G	G	T	G	G	G	G	T	G	G	T	G	G	G	G	G	G	G	G	G	G	G	G	G	G
	T	G	0	T	G	T	G	G	T	G	G	G	G	G	G	G	G	G	G	G	G	G	G	G	G	G	T	G	G	G	G	T	G	G	T	G	G	G	G	G	G	G	G	G	G	G	G	G	G
PZE-101066560	G	T	0	G	T	G	T	0	G	T	T	0	T	T	0	T	T	T	T	T	T	T	T	T	T	T	G	T	T	T	T	G	T	T	G	T	T	T	T	T	T	T	T	T	T	T	T	T	T
	G	T	0	G	T	G	T	0	G	T	T	0	T	T	0	T	T	T	T	T	T	T	T	T	T	T	G	T	T	T	T	G	T	T	G	T	T	T	T	T	T	T	T	T	T	T	T	T	T
PZE-101066588	C	T	0	C	T	C	T	T	C	T	T	T	T	T	T	T	T	T	T	T	T	T	T	T	T	T	C	T	T	T	T	C	T	T	C	T	T	T	T	T	T	T	T	T	T	T	T	T	T
	C	T	0	C	T	C	T	T	C	T	T	T	T	T	T	T	T	T	T	T	T	T	T	T	T	T	C	T	T	T	T	C	T	T	C	T	T	T	T	T	T	T	T	T	T	T	T	T	T
PZE-101066593	0	A	A	0	A	0	A	A	0	G	A	A	A	A	A	A	G	A	A	A	A	A	A	A	A	A	0	A	A	A	A	0	A	A	0	A	A	A	A	A	A	A	A	A	A	A	A	A	A
	0	A	A	0	A	0	A	A	0	G	A	A	A	A	A	A	G	A	A	A	A	A	A	A	A	A	0	A	A	A	A	0	A	A	0	A	A	A	A	A	A	A	A	A	A	A	A	A	A
PZE-101066687	A	G	0	G	G	G	G	G	G	G	G	G	G	G	G	G	G	G	G	G	G	G	G	G	G	G	G	G	G	G	G	G	G	G	A	G	G	G	G	G	G	G	G	G	G	G	G	G	G
	A	G	0	G	G	G	G	G	G	G	G	G	G	G	G	G	G	G	G	G	G	G	G	G	G	G	G	G	G	G	G	G	G	G	A	G	G	G	G	G	G	G	G	G	G	G	G	G	G
PZE-101066827	0	T	T	C	T	C	T	T	C	T	T	T	T	T	T	T	T	T	T	T	T	T	T	T	T	T	T	T	T	T	T	C	T	T	0	T	T	T	T	T	T	T	T	T	T	T	T	T	T
	0	T	T	C	T	C	T	T	C	T	T	T	T	T	T	T	T	T	T	T	T	T	T	T	T	T	T	T	T	T	T	C	T	T	0	T	T	T	T	T	T	T	T	T	T	T	T	T	T
PZE-101066885	A	A	A	A	A	G	A	A	G	A	A	A	A	A	A	0	A	A	A	A	A	A	A	A	A	A	G	A	A	A	A	0	A	A	A	A	A	A	A	A	0	A	A	A	A	A	A	0	A
	A	A	A	A	A	G	A	A	G	A	A	A	A	A	A	0	A	A	A	A	A	A	A	A	A	A	G	A	A	A	A	0	A	A	A	A	A	A	A	A	0	A	A	A	A	A	A	0	A
PZE-101066898	T	C	0	T	C	C	C	C	C	C	C	C	C	C	C	C	C	C	C	C	C	C	C	C	C	C	C	C	C	C	C	C	C	C	T	C	C	C	C	C	C	C	T	C	C	C	C	C	C
	T	C	0	T	C	C	C	C	C	C	C	C	C	C	C	C	C	C	C	C	C	C	C	C	C	C	C	C	C	C	C	C	C	C	T	C	C	C	C	C	C	C	T	C	C	C	C	C	C
PZE-101066907	G	G	G	G	G	G	G	G	G	A	A	G	A	G	G	G	G	G	G	G	A	A	A	G	G	G	G	G	A	A	A	G	G	A	G	G	A	G	G	G	G	G	G	G	G	G	G	G	A
	G	G	G	G	G	G	G	G	G	A	A	G	A	G	G	G	G	G	G	G	A	A	A	G	G	G	G	G	A	A	A	G	G	A	G	G	A	G	G	G	G	G	G	G	G	G	G	G	A
PZE-101066925	C	T	C	C	C	T	C	C	0	C	C	C	C	T	C	C	C	C	C	C	C	C	C	C	T	C	C	C	C	C	C	C	C	C	C	C	C	C	C	C	C	C	C	C	T	T	C	C	C
	C	T	C	C	C	T	C	C	0	C	C	C	C	T	C	C	C	C	C	C	C	C	C	C	T	C	C	C	C	C	C	C	C	C	C	C	C	C	C	C	C	C	C	C	T	T	C	C	C
PZE-101066968	G	T	G	G	G	T	G	G	T	G	G	G	G	T	G	G	G	G	G	G	G	G	G	G	T	G	G	G	G	G	G	G	G	G	G	G	G	G	G	G	G	G	G	G	T	T	G	G	G
	G	T	G	G	G	T	G	G	T	G	G	G	G	T	G	G	G	G	G	G	G	G	G	G	T	G	G	G	G	G	G	G	G	G	G	G	G	G	G	G	G	G	G	G	T	T	G	G	G
PZE-101066969	C	A	0	C	A	A	A	C	A	A	A	C	A	A	C	A	A	A	A	A	A	A	A	A	A	C	C	A	A	A	A	A	A	A	C	A	A	A	C	C	A	A	C	A	A	A	C	A	A
	C	A	0	C	A	A	A	C	A	A	A	C	A	A	C	A	A	A	A	A	A	A	A	A	A	C	C	A	A	A	A	A	A	A	C	A	A	A	C	C	A	A	C	A	A	A	C	A	A
PZE-101066970	C	T	0	C	T	T	T	T	T	T	T	T	T	T	T	T	T	T	T	T	T	T	T	T	T	T	C	T	T	T	T	T	T	T	C	T	T	T	T	T	T	T	C	T	T	T	T	T	T
	C	T	0	C	T	T	T	T	T	T	T	T	T	T	T	T	T	T	T	T	T	T	T	T	T	T	C	T	T	T	T	T	T	T	C	T	T	T	T	T	T	T	C	T	T	T	T	T	T
PZE-101066977	T	C	0	T	C	C	C	T	C	C	C	T	C	C	T	C	C	C	C	C	C	C	C	C	C	T	0	C	C	C	C	C	C	C	T	C	C	C	T	T	C	C	T	C	C	C	T	C	C
	T	C	0	T	C	C	C	T	C	C	C	T	C	C	T	C	C	C	C	C	C	C	C	C	C	T	0	C	C	C	C	C	C	C	T	C	C	C	T	T	C	C	T	C	C	C	T	C	C
PZE-101067021	C	A	A	C	A	A	A	C	A	A	A	C	A	A	C	A	A	A	A	A	A	A	A	A	A	C	C	A	A	A	A	A	A	A	C	A	A	A	C	C	A	A	C	A	A	A	C	A	A
	C	A	C	C	A	A	A	C	A	A	A	C	A	A	C	A	A	A	A	A	A	A	A	A	A	C	C	A	A	A	A	A	A	A	C	A	A	A	C	C	A	A	C	A	A	A	C	A	A
PZE-101067031	T	G	G	T	G	G	G	T	G	G	G	T	G	G	T	G	G	G	G	G	G	G	G	G	G	T	T	G	G	G	G	G	G	G	T	G	G	G	0	T	G	G	T	G	G	G	T	G	G
	T	G	G	T	G	G	G	T	G	G	G	T	G	G	T	G	G	G	G	G	G	G	G	G	G	T	T	G	G	G	G	G	G	G	T	G	G	G	0	T	G	G	T	G	G	G	T	G	G
PZE-101067088	T	C	0	T	C	C	C	C	C	C	C	C	C	C	C	C	C	C	C	C	C	C	C	C	C	C	T	C	C	C	C	C	C	C	T	C	C	C	C	C	C	C	T	C	C	C	C	C	C
	T	C	0	T	C	C	C	C	C	C	C	C	C	C	C	C	C	C	C	C	C	C	C	C	C	C	T	C	C	C	C	C	C	C	T	C	C	C	C	C	C	C	T	C	C	C	C	C	C
PZE-101067102	C	C	0	C	A	C	A	C	C	A	A	C	A	C	C	A	A	A	A	A	A	A	A	A	C	C	C	A	A	A	A	A	A	A	C	A	A	A	C	C	A	A	C	A	C	C	C	A	A
	C	C	0	C	A	C	A	C	C	A	A	C	A	C	C	A	A	A	A	A	A	A	A	A	C	C	C	A	A	A	A	A	A	A	C	A	A	A	C	C	A	A	C	A	C	C	C	A	A
PZE-101067271	A	A	C	A	A	A	A	C	A	A	A	C	A	A	0	A	A	A	0	A	A	A	A	A	C	A	C	C	A	A	A	C	A	C	A	A	A	A	A	A	A	A	0	A	A	A	A	A	A
	A	A	C	A	A	A	A	C	A	A	A	C	A	A	0	A	A	A	0	A	A	A	A	A	C	A	C	C	A	A	A	C	A	C	A	A	A	A	A	A	A	A	0	A	A	A	A	A	A
PZE-101067487	C	C	C	C	C	C	A	C	C	C	C	C	A	C	C	C	C	C	C	A	C	A	A	A	A	A	C	C	A	A	A	C	A	A	C	C	C	C	A	A	A	A	C	A	A	C	A	A	A
	C	C	C	C	C	C	A	C	C	C	C	C	A	C	C	C	C	C	C	A	C	A	A	A	A	A	C	C	A	A	A	C	A	A	C	C	C	C	A	A	A	A	C	A	A	C	A	A	A
PZE-101067576	C	C	A	C	A	A	A	C	C	C	A	C	A	C	C	C	C	C	A	C	A	A	A	A	C	A	C	C	A	A	A	C	A	A	C	A	A	C	C	A	A	A	A	A	C	C	A	A	C
	C	C	A	C	A	A	A	C	C	C	A	C	A	C	C	C	C	C	A	C	A	A	A	A	C	A	C	C	A	A	A	C	A	A	C	A	A	C	C	A	A	A	A	A	C	C	A	A	C
PZE-101067628	A	G	G	G	G	G	G	G	G	G	G	G	G	G	G	A	G	G	G	A	G	G	G	G	G	G	G	A	A	A	G	G	G	G	A	G	G	A	G	A	G	G	G	G	G	G	G	G	G
	A	G	G	G	G	G	G	G	G	G	G	G	G	G	G	A	G	G	G	A	G	G	G	G	G	G	G	A	A	A	G	G	G	G	A	G	G	A	G	A	G	G	G	G	G	G	G	G	G
PZE-101067639	A	G	G	G	G	G	G	G	A	G	G	G	G	G	G	A	G	G	G	A	G	G	A	G	G	G	G	A	A	G	A	G	G	G	A	G	G	G	G	G	A	G	G	G	G	G	G	G	G
	A	G	G	G	G	G	G	G	A	G	G	G	G	G	G	A	G	G	G	A	G	G	A	G	G	G	G	A	A	G	A	G	G	G	A	G	G	G	G	G	A	G	G	G	G	G	G	G	G
PZE-101067788	T	C	T	T	C	T	T	C	C	C	T	T	T	C	C	C	T	T	T	T	T	T	C	T	C	T	C	T	T	T	T	T	T	T	T	T	C	T	T	T	C	T	C	T	T	T	T	T	T
	T	C	T	T	C	T	T	C	C	C	T	T	T	C	C	C	T	T	T	T	T	T	C	T	C	T	C	T	T	T	T	T	T	T	T	T	C	T	T	T	C	T	C	T	T	T	T	T	T
PZE-101067809	G	T	0	T	T	G	G	T	T	T	T	T	T	T	T	T	G	T	T	T	G	T	T	G	T	T	T	G	T	T	G	T	G	G	T	T	T	G	T	G	T	T	T	T	G	G	T	T	G
	G	T	0	T	T	G	G	T	T	T	T	T	T	T	T	T	G	T	T	T	G	T	T	G	T	T	T	G	T	T	G	T	G	G	T	T	T	G	T	G	T	T	T	T	G	G	T	T	G
PZE-101067972	C	T	C	C	C	C	C	C	0	T	0	T	C	C	T	T	T	C	C	C	C	T	C	T	C	C	C	C	T	C	C	C	T	C	C	C	C	T	T	C	C	C	C	C	C	C	C	C	C
	C	T	C	C	C	C	C	C	0	T	0	T	C	C	T	T	T	C	C	C	C	T	C	T	C	C	C	C	T	C	C	C	T	C	C	C	C	T	T	C	C	C	C	C	C	C	C	C	C
PZE-101067978	G	T	G	G	G	G	G	G	T	T	G	T	G	G	G	T	T	G	G	G	G	T	G	G	G	G	G	G	T	G	G	G	G	G	G	G	G	G	T	G	G	G	G	G	G	G	G	G	G
	G	T	G	G	G	G	G	G	T	T	G	T	G	G	G	T	T	G	G	G	G	T	G	G	G	G	G	G	T	G	G	G	G	G	G	G	G	G	T	G	G	G	G	G	G	G	G	G	G
PZE-101067998	G	G	T	G	T	T	T	G	0	G	0	T	T	G	T	G	G	T	T	T	T	G	T	T	T	T	T	T	T	T	T	G	T	T	T	T	G	G	T	T	T	T	G	T	T	T	T	T	G
	G	G	T	G	T	T	T	G	0	G	0	T	T	G	T	G	G	T	T	T	T	G	T	T	T	T	T	T	T	T	T	G	T	T	T	T	G	G	T	T	T	T	G	T	T	T	T	T	G
PZE-101068238	G	G	A	G	A	A	G	G	A	A	A	G	G	G	G	A	G	G	A	G	A	G	A	A	G	G	0	A	G	G	A	A	A	G	G	A	G	G	G	A	G	A	G	G	G	A	G	G	A
	G	G	A	G	A	A	G	G	A	A	A	G	G	G	G	A	G	G	A	G	A	G	A	A	G	G	0	A	G	G	A	A	A	G	G	A	G	G	G	A	G	A	G	G	G	A	G	G	A
PZE-101068242	T	T	T	T	T	T	T	T	T	T	T	T	G	T	T	T	T	G	T	G	T	T	G	T	G	G	G	G	G	G	T	T	T	T	G	T	T	G	T	T	G	T	T	T	T	T	G	G	T
	T	T	T	T	T	T	T	T	T	T	T	T	G	T	T	T	T	G	T	G	T	T	G	T	G	G	G	G	G	G	T	T	T	T	G	T	T	G	T	T	G	T	T	T	T	T	G	G	T
PZE-101068426	T	C	C	T	T	T	T	C	C	C	0	T	C	C	C	T	T	C	C	C	C	T	C	C	C	C	C	C	C	C	C	C	C	C	C	C	T	C	C	C	C	T	T	T	C	C	C	C	C
	T	C	C	T	T	T	T	C	C	C	0	T	C	C	C	T	T	C	C	C	C	T	C	C	C	C	C	C	C	C	C	C	C	C	C	C	T	C	C	C	C	T	T	T	C	C	C	C	C
PZE-101068578	G	G	G	G	G	G	G	G	G	G	G	G	A	G	G	G	G	G	G	G	G	G	G	G	G	G	A	G	G	A	G	G	G	G	A	G	G	G	G	G	G	G	G	G	G	G	G	G	G
	G	G	G	G	G	G	G	G	G	G	G	G	A	G	G	G	G	G	G	G	G	G	G	G	G	G	A	G	G	A	G	G	G	G	A	G	G	G	G	G	G	G	G	G	G	G	G	G	G
PZE-101068676	G	G	G	G	G	G	G	G	G	G	0	G	G	G	G	G	G	A	G	A	G	A	G	G	G	G	G	G	A	G	G	A	G	G	G	A	G	G	G	G	A	G	G	G	G	G	G	G	G
	G	G	G	G	G	G	G	G	G	G	0	G	G	G	G	G	G	A	G	A	G	A	G	G	G	G	G	G	A	G	G	A	G	G	G	A	G	G	G	G	A	G	G	G	G	G	G	G	G
PZE-101068682	A	G	G	G	A	G	A	A	A	G	G	G	G	G	G	A	G	A	G	A	G	A	A	A	A	A	G	A	A	G	G	A	A	A	G	A	A	A	G	G	A	A	A	A	A	G	G	G	G
	A	G	G	G	A	G	A	A	A	G	G	G	G	G	G	A	G	A	G	A	G	A	A	A	A	A	G	A	A	G	G	A	A	A	G	A	A	A	G	G	A	A	A	A	A	G	G	G	G
PZE-101068696	A	C	0	A	A	C	A	C	0	A	A	0	A	A	A	A	0	A	0	A	C	0	C	C	C	C	A	C	A	A	C	0	A	A	A	C	A	C	C	C	A	C	A	0	C	A	C	C	0
	A	C	0	A	A	C	A	C	0	A	A	0	A	A	A	A	0	A	0	A	C	0	C	C	C	C	A	C	A	A	C	0	A	A	A	C	A	C	C	C	A	C	A	0	C	A	C	C	0
PZE-101068716	C	C	C	C	C	T	C	C	C	C	C	C	C	C	C	C	C	C	C	C	T	C	C	T	C	C	C	C	C	C	T	T	C	0	C	C	C	C	C	C	C	C	C	C	C	C	C	C	C
	C	C	C	C	C	T	C	C	C	C	C	C	C	C	C	C	C	C	C	C	T	C	C	T	C	C	C	C	C	C	T	T	C	0	C	C	C	C	C	C	C	C	C	C	C	C	C	C	C
PZE-101068745	C	C	0	C	C	C	T	C	C	T	C	T	T	C	C	C	T	C	T	C	C	T	C	T	C	C	0	C	C	T	C	C	T	C	T	C	C	T	T	C	C	T	T	T	T	C	C	C	T
	C	C	0	C	C	C	T	C	C	T	C	T	T	C	C	C	T	C	T	C	C	T	C	T	C	C	0	C	C	T	C	C	T	C	T	C	C	T	T	C	C	T	T	T	T	C	C	C	T
PZE-101068888	C	C	0	C	T	T	C	C	C	C	T	C	T	C	C	T	C	C	C	C	C	C	T	C	C	C	T	T	C	T	C	C	C	C	T	T	T	C	C	T	C	C	C	C	C	C	T	T	C
	C	C	0	C	T	T	C	C	C	C	T	C	T	C	C	T	C	C	C	C	C	C	T	C	C	C	T	T	C	T	C	C	C	C	T	T	T	C	C	T	C	C	C	C	C	C	T	T	C
PZE-101069006	T	T	T	T	C	C	T	T	T	T	T	T	C	T	T	C	T	T	T	T	T	T	C	T	T	C	T	T	T	T	T	T	T	T	T	T	C	T	C	T	T	C	T	T	T	T	C	C	T
	T	T	T	T	C	C	T	T	T	T	T	T	C	T	T	C	T	T	T	T	T	T	C	T	T	C	T	T	T	T	T	T	T	T	T	T	C	T	C	T	T	C	T	T	T	T	C	C	T
PZE-101069059	A	C	C	A	A	A	A	A	A	C	A	C	A	A	C	A	C	C	C	A	C	A	A	C	C	C	A	C	C	A	A	C	A	A	A	C	A	A	C	A	C	A	C	C	A	A	A	A	C
	A	C	C	A	A	A	A	A	A	C	A	C	A	A	C	A	C	C	C	A	C	A	A	C	C	C	A	C	C	A	A	C	A	A	A	C	A	A	C	A	C	A	C	C	A	A	A	A	C
PZE-101069140	G	T	G	G	G	T	G	G	G	G	T	G	G	G	T	G	G	T	G	G	G	G	T	G	G	T	G	T	T	T	T	G	T	G	G	T	G	T	T	G	T	G	G	G	T	G	T	T	G
	G	T	G	G	G	T	G	G	G	G	T	G	G	G	T	G	G	T	G	G	G	G	T	G	G	T	G	T	T	T	T	G	T	G	G	T	G	T	T	G	T	G	G	G	T	G	T	T	G
PZE-101069158	T	T	T	T	T	G	T	T	T	T	T	T	T	G	T	T	T	T	T	T	G	T	0	T	T	T	G	T	T	T	T	T	G	0	G	G	T	T	T	T	T	T	G	G	G	T	G	G	T
	T	T	G	T	T	G	T	T	T	T	T	T	T	G	T	T	T	T	T	T	G	T	0	T	T	T	G	T	T	T	T	T	G	0	G	G	T	T	T	T	T	T	G	G	G	T	G	G	T
PZE-101069159	G	G	0	G	0	A	G	G	G	G	0	G	G	A	A	G	G	A	G	A	A	0	0	G	G	A	A	A	A	G	G	G	A	0	A	A	G	G	A	G	A	G	A	A	A	G	A	A	G
	G	G	0	G	0	A	G	G	G	G	0	G	G	A	A	G	G	A	G	A	A	0	0	G	G	A	A	A	A	G	G	G	A	0	A	A	G	G	A	G	A	G	A	A	A	G	A	A	G
PZE-101069206	C	C	0	C	C	T	T	C	T	C	0	C	C	C	C	C	T	C	C	C	T	T	C	C	T	T	C	C	C	C	C	C	C	C	C	C	T	T	C	C	C	C	C	C	C	C	C	C	C
	C	C	0	C	C	T	T	C	T	C	0	C	C	C	C	C	T	C	C	C	T	T	C	C	T	T	C	C	C	C	C	C	C	C	C	C	T	T	C	C	C	C	C	C	C	C	C	C	C
PZE-101069307	C	C	T	C	C	T	T	C	T	C	0	C	T	C	T	C	T	C	T	T	C	T	C	T	C	C	T	C	C	T	C	T	T	T	C	C	T	C	C	T	T	C	C	C	C	C	T	C	C
	C	C	T	C	C	T	T	C	T	C	0	C	T	C	T	C	T	C	T	T	C	T	C	T	C	C	T	C	C	T	C	T	T	T	C	C	T	C	C	T	T	C	C	C	C	C	T	C	C
PZE-101069294	G	A	A	G	G	A	A	G	A	G	0	G	A	A	A	A	G	G	A	G	G	A	G	A	A	G	A	G	A	A	G	A	A	A	G	A	A	G	G	A	A	G	G	A	G	G	A	A	G
	G	A	A	G	G	A	A	G	A	G	0	G	A	A	A	A	G	G	A	G	G	A	G	A	A	G	A	G	A	A	G	A	A	A	G	A	A	G	G	A	A	G	G	A	G	G	A	A	G
PZE-101069270	A	A	A	G	G	A	A	G	A	A	0	A	A	A	A	A	G	A	A	G	G	A	G	A	G	G	A	G	A	A	G	A	A	A	G	A	A	G	G	G	G	A	G	A	G	G	A	A	0
	A	A	A	G	G	A	A	G	A	A	0	A	A	A	A	A	G	A	A	G	G	A	G	A	G	G	A	G	A	A	G	A	A	A	G	A	A	G	G	G	G	A	G	A	G	G	A	A	0
PZE-101069343	A	A	0	G	G	A	A	G	A	A	G	A	G	A	A	A	A	A	G	A	A	A	A	G	G	A	G	A	A	G	G	G	G	G	G	G	A	G	G	A	A	A	A	G	A	A	A	G	G
	A	A	0	G	G	A	A	G	A	A	G	A	G	A	A	A	A	A	G	A	A	A	A	G	G	A	G	A	A	G	G	G	G	G	G	G	A	G	G	A	A	A	A	G	A	A	A	G	G
PZE-101069709	G	G	0	G	T	G	G	G	G	G	0	G	T	G	G	G	G	G	T	G	G	G	G	G	T	G	G	G	G	G	T	G	G	G	T	G	G	T	G	T	T	G	G	G	G	G	G	G	T
	G	G	0	G	T	G	G	G	G	G	0	G	T	G	G	G	G	G	T	G	G	G	G	G	T	G	G	G	G	G	T	G	G	G	T	G	G	T	G	T	T	G	G	G	G	G	G	G	T
PZE-101069763	T	T	0	T	T	T	T	T	T	T	T	T	G	T	T	T	T	T	G	T	T	T	T	T	T	T	T	T	G	G	T	T	T	T	G	T	T	T	T	T	T	T	T	T	T	T	T	T	G
	T	T	0	T	T	T	T	T	T	T	T	T	G	T	T	T	T	T	G	T	T	T	T	T	T	T	T	T	G	G	T	T	T	T	G	T	T	T	T	T	T	T	T	T	T	T	T	T	G
PZE-101070117	G	G	G	G	G	G	G	G	G	G	G	G	G	G	G	G	G	G	G	G	G	G	A	G	G	G	G	G	G	G	A	G	G	A	A	G	G	G	A	G	G	G	G	G	G	A	G	G	G
	G	G	G	G	G	G	G	G	G	G	G	G	G	G	G	G	G	G	G	G	G	G	A	G	G	G	G	G	G	G	A	G	G	A	A	G	G	G	A	G	G	G	G	G	G	A	G	G	G
PZE-101070341	G	G	G	A	G	G	G	A	G	G	G	G	G	A	A	G	G	G	G	G	G	G	G	G	A	G	G	G	G	G	G	G	G	G	G	A	G	A	G	G	G	G	G	A	G	G	G	G	G
	G	G	G	A	G	G	G	A	G	G	G	G	G	A	A	G	G	G	G	G	G	G	G	G	A	G	G	G	G	G	G	G	G	G	G	A	G	A	G	G	G	G	G	A	G	G	G	G	G
PZE-101070408	A	A	0	G	A	A	A	A	A	A	A	G	A	A	A	G	A	A	G	A	A	A	G	G	A	A	A	G	G	A	A	G	A	G	A	A	A	G	G	A	A	A	A	G	A	A	A	A	A
	A	A	0	G	A	A	A	A	A	A	A	G	A	A	A	G	A	A	G	A	A	A	G	G	A	A	A	G	G	A	A	G	A	G	A	A	A	G	G	A	A	A	A	G	A	A	A	A	A
PZE-101070701	A	A	A	A	C	A	A	A	A	0	C	A	A	A	A	A	A	A	C	A	A	C	A	A	A	A	A	A	A	A	A	A	0	A	A	A	A	A	A	A	C	A	A	A	0	A	A	A	A
	A	A	C	A	C	A	A	A	A	0	C	A	A	A	A	A	A	A	C	A	A	C	A	A	A	A	A	A	A	A	A	A	0	A	A	A	A	A	A	A	C	A	A	A	0	A	A	A	A
PZE-101070781	A	C	A	A	A	A	A	A	A	A	0	C	A	A	A	C	C	C	A	C	A	C	C	C	C	C	A	A	C	A	C	C	C	C	C	A	A	C	C	C	C	C	A	A	A	C	C	C	C
	A	C	C	A	A	A	A	A	A	A	0	C	A	A	A	C	C	C	A	C	A	C	C	C	C	C	A	A	C	A	C	C	C	C	C	A	A	C	C	C	C	C	A	A	A	C	C	C	C
PZE-101070816	G	A	A	G	A	A	A	G	A	G	A	A	G	A	A	A	A	A	A	A	A	A	A	0	G	A	G	G	A	A	G	A	A	G	A	G	A	G	G	A	A	G	A	A	A	A	G	G	G
	G	A	A	G	A	A	A	G	A	G	A	A	G	A	A	A	A	A	A	A	A	A	A	0	G	A	G	G	A	A	G	A	A	G	A	G	A	G	G	A	A	G	A	A	A	A	G	G	G
PZE-101070841	0	G	G	0	A	A	G	0	G	0	G	G	A	G	G	G	A	G	G	G	A	G	G	G	G	G	A	0	G	G	G	G	A	G	G	A	G	G	G	A	G	G	G	G	A	G	A	A	0
	0	G	G	0	A	A	G	0	G	0	G	G	A	G	G	G	A	G	G	G	A	G	G	G	G	G	A	0	G	G	G	G	A	G	G	A	G	G	G	A	G	G	G	G	A	G	A	A	0
PZE-101070910	A	A	G	A	A	G	A	A	A	A	G	G	G	A	A	A	G	A	G	G	A	G	G	A	G	A	A	G	G	A	G	A	A	A	A	A	A	A	G	A	A	G	A	A	G	A	A	G	G
	A	A	G	A	A	G	A	A	A	A	G	G	G	A	A	A	G	A	G	G	A	G	G	A	G	A	A	G	G	A	G	A	A	A	A	A	A	A	G	A	A	G	A	A	G	A	A	G	G
PZE-101070948	G	0	0	A	G	G	G	G	G	G	A	A	G	G	G	G	G	A	A	A	G	A	A	0	A	0	G	A	A	G	G	0	G	0	A	A	G	A	A	G	G	G	G	G	G	G	A	A	G
	G	0	0	A	G	G	G	G	G	G	A	A	G	G	G	G	G	A	A	A	G	A	A	0	A	0	G	A	A	G	G	0	G	0	A	A	G	A	A	G	G	G	G	G	G	G	A	A	G
PZE-101071092	A	G	G	G	A	G	A	A	0	A	0	A	G	A	A	A	G	A	G	G	A	G	G	G	G	A	0	A	G	A	G	G	G	G	G	G	A	G	A	G	G	G	A	G	A	G	G	G	0
	A	G	G	G	A	G	A	A	0	A	0	A	G	A	A	A	G	A	G	G	A	G	G	G	G	A	0	A	G	A	G	G	G	G	G	G	A	G	A	G	G	G	A	G	A	G	G	G	0
PZE-101071115	C	C	C	T	C	C	C	C	T	C	C	C	T	C	C	C	C	C	C	T	C	C	C	C	C	C	C	C	C	C	C	C	C	C	T	C	C	C	C	C	C	C	C	C	C	T	C	T	C
	C	C	C	T	C	C	C	C	T	C	C	C	T	C	C	C	C	C	C	T	C	C	C	C	C	C	C	C	C	C	C	C	C	C	T	C	C	C	C	C	C	C	C	C	C	T	C	T	C
PZE-101071162	C	C	T	T	C	C	T	T	0	C	T	T	T	C	C	C	C	T	T	C	C	C	C	T	T	T	T	T	T	C	C	T	T	C	T	T	T	C	T	C	T	C	C	C	T	T	T	T	T
	C	C	T	T	C	C	T	T	0	C	C	T	T	C	C	C	C	T	T	C	C	C	C	T	T	T	T	T	T	C	C	T	T	C	T	T	T	C	T	C	T	C	C	C	T	T	T	T	T
PZE-101071273	A	G	A	G	G	G	G	G	0	G	G	A	G	G	G	G	G	A	A	G	G	G	G	A	A	A	0	A	G	G	G	A	A	G	G	A	G	A	G	A	A	G	G	G	G	A	G	G	A
	A	G	A	G	G	G	G	G	0	G	G	A	G	G	G	G	G	A	A	G	G	G	G	A	A	A	0	A	G	G	G	A	A	G	G	A	G	A	G	A	A	G	G	G	G	A	G	G	G
PZE-101071282	C	T	C	C	C	C	C	C	C	C	0	T	C	C	C	C	C	C	C	C	C	C	C	T	C	T	C	T	T	C	C	T	C	C	C	T	C	C	C	C	C	C	C	C	T	C	C	T	C
	C	T	C	C	C	C	C	C	C	C	0	T	C	C	C	C	C	C	C	C	C	C	C	T	C	T	C	T	T	C	C	T	C	C	C	T	C	C	C	C	C	C	C	C	T	C	C	T	C
PZE-101071285	T	T	C	C	T	C	C	C	C	C	T	T	T	C	C	C	C	T	T	T	C	T	T	T	T	T	C	T	T	C	T	T	T	T	T	T	C	T	T	T	T	T	C	T	T	T	T	T	T
	T	T	C	C	T	C	C	C	C	C	T	T	T	C	C	C	C	T	T	T	C	T	T	T	T	T	C	T	T	C	T	T	T	T	T	T	C	T	T	T	T	T	C	T	T	T	T	T	C
PZE-101071289	A	A	G	G	G	G	G	G	G	G	0	A	G	G	G	G	G	G	G	G	G	G	G	A	A	A	G	A	A	G	A	G	G	G	G	A	G	G	G	G	G	G	G	A	A	G	G	A	G
	A	A	G	G	G	G	G	G	G	G	0	A	G	G	G	G	G	G	G	G	G	G	G	A	A	A	G	A	A	G	A	G	G	G	G	A	G	G	G	G	G	G	G	A	A	G	G	A	G
PZE-101071350	G	G	0	A	A	A	A	A	A	A	0	G	G	A	A	A	A	G	G	G	A	G	G	A	A	A	A	G	G	A	G	A	G	G	G	A	A	A	A	A	A	A	A	A	A	A	A	A	A
	G	G	0	A	A	A	A	A	A	A	0	G	G	A	A	A	A	G	G	G	A	G	G	A	A	A	A	G	G	A	G	A	G	G	G	A	A	A	A	A	A	A	A	A	A	A	A	A	A
PZE-101071373	G	G	G	G	G	G	G	G	G	G	G	G	G	G	G	G	G	G	G	G	G	G	G	G	T	T	G	G	G	G	G	G	G	G	G	G	G	G	T	T	T	T	G	T	T	T	T	T	G
	G	G	G	G	G	G	G	G	G	G	G	G	G	G	G	G	G	G	G	G	G	G	G	G	T	T	G	G	G	G	G	G	G	G	G	G	G	G	T	T	T	T	G	T	T	T	T	T	G
PZE-101071564	A	A	0	A	A	G	A	A	0	A	0	G	G	A	A	A	A	G	G	A	A	A	A	A	A	A	A	G	A	A	A	A	A	G	G	A	A	A	A	G	G	A	A	G	G	G	A	G	0
	A	A	0	A	A	G	A	A	0	A	0	G	G	A	A	A	A	G	G	A	A	A	A	A	A	A	A	G	A	A	A	A	A	G	G	A	A	A	A	G	G	A	A	G	G	G	A	G	0
PZE-101071660	A	A	A	A	G	A	A	A	A	A	G	A	A	A	A	A	A	A	A	A	G	G	A	A	A	A	A	A	A	A	A	A	A	A	A	A	A	A	A	A	A	A	A	A	G	A	A	G	A
	A	A	A	A	G	A	A	A	A	A	G	A	A	A	A	A	A	A	A	A	G	G	A	A	A	A	A	A	A	A	A	A	A	A	A	A	A	A	A	A	A	A	A	A	G	A	A	G	A
PZE-101071663	T	T	T	T	T	T	T	T	T	T	T	T	T	T	T	T	T	C	T	T	T	T	T	T	T	T	T	T	T	T	T	C	C	T	T	C	T	T	T	T	T	T	T	T	T	T	T	T	T
	T	T	T	T	T	T	T	T	T	T	T	T	T	T	T	T	T	C	T	T	T	T	T	T	T	T	T	T	T	T	T	C	C	T	T	C	T	T	T	T	T	T	T	T	T	T	T	T	T
PZE-101071675	C	C	C	C	C	C	C	C	C	C	C	C	T	C	C	C	C	C	T	C	C	C	C	T	C	C	C	C	T	C	T	C	C	T	T	C	T	C	C	C	C	T	C	T	C	C	T	C	C
	C	C	C	C	C	C	C	C	C	C	C	C	T	C	C	C	C	C	T	C	C	C	C	T	C	C	C	C	T	C	T	C	C	T	T	C	T	C	C	C	C	T	C	T	C	C	T	C	C
PZE-101071843	A	A	0	A	G	A	A	A	A	G	G	G	G	A	A	G	A	G	G	G	A	G	A	G	G	0	A	G	G	A	G	A	G	G	G	G	G	A	G	G	A	G	A	G	G	G	G	G	A
	A	A	0	A	G	A	A	A	A	G	G	G	G	A	A	G	A	G	G	G	A	G	A	G	G	0	A	G	G	A	G	A	G	G	G	G	G	A	G	G	A	G	A	G	G	G	G	G	A
PZE-101071808	C	C	0	C	A	C	C	C	0	A	A	A	C	C	C	A	C	C	A	A	C	A	C	C	C	A	C	A	A	C	A	C	C	C	C	C	C	C	A	C	A	A	C	C	C	A	C	C	C
	C	C	0	C	A	C	C	C	0	A	A	A	C	C	C	A	C	C	A	A	C	A	C	C	C	A	C	A	A	C	A	C	C	C	C	C	C	C	A	C	A	A	C	C	C	A	C	C	C
PZE-101071795	C	T	T	C	T	C	T	C	C	0	0	0	T	C	T	T	C	T	T	0	C	C	T	T	T	T	T	0	T	C	T	T	T	T	T	T	T	T	C	T	T	T	T	T	T	T	T	T	T
	C	T	T	C	T	C	T	C	C	0	0	0	T	C	T	T	C	T	T	0	C	C	T	T	T	T	T	0	T	C	T	T	T	T	T	T	T	T	C	T	T	T	T	T	T	T	T	T	T
PZE-101071793	C	C	C	C	C	C	C	C	C	T	T	T	T	C	C	C	C	C	C	T	C	T	T	T	T	C	C	T	C	C	C	T	T	C	T	T	T	T	C	C	C	C	C	T	T	C	C	T	C
	C	C	C	C	C	C	C	C	C	T	T	T	T	C	C	C	C	C	C	T	C	T	T	T	T	C	C	T	C	C	C	T	T	C	T	T	T	T	C	C	C	C	C	T	T	C	C	T	C
PZE-101071870	A	A	A	A	0	A	A	A	A	0	A	0	G	A	A	0	A	A	0	G	A	0	A	G	0	A	A	A	0	A	A	A	G	A	G	G	G	A	0	A	A	A	A	G	A	A	0	A	0
	A	A	A	A	0	A	A	A	A	0	A	0	G	A	A	0	A	A	0	G	A	0	A	G	0	A	A	A	0	A	A	A	G	A	G	G	G	A	0	A	A	A	A	G	A	A	0	A	0
PZE-101071897	G	G	G	G	G	G	G	G	G	G	G	G	A	G	G	G	G	G	G	A	G	G	A	A	G	A	G	G	G	G	G	G	A	G	A	A	A	A	G	G	A	0	G	A	A	G	G	A	G
	G	G	G	G	G	G	G	G	G	G	G	G	A	G	G	G	G	G	G	A	G	G	A	A	G	A	G	G	G	G	G	G	A	G	A	A	A	A	G	G	A	0	G	A	A	G	G	A	G
PZE-101071898	C	C	C	C	C	C	C	C	C	C	C	C	T	C	C	C	C	C	C	T	C	C	T	T	C	T	C	C	C	C	C	C	T	C	T	T	T	T	C	C	T	C	C	T	T	C	C	T	C
	C	C	C	C	C	C	C	C	C	C	C	C	T	C	C	C	C	C	C	T	C	C	T	T	C	T	C	C	C	C	C	C	T	C	T	T	T	T	C	C	T	C	C	T	T	C	C	T	C
PZE-101071912	T	G	G	T	G	T	G	T	T	G	G	G	G	T	G	G	T	G	G	G	G	G	G	G	G	G	G	G	G	G	G	T	G	G	G	G	G	G	G	G	G	G	T	G	G	G	G	G	G
	T	G	G	T	G	T	G	T	T	G	G	G	G	T	G	G	T	G	G	G	G	G	G	G	G	G	G	G	G	G	G	T	G	G	G	G	G	G	G	G	G	G	T	G	G	G	G	G	G
PZE-101072147	T	C	C	T	C	T	C	T	T	T	T	T	T	T	C	T	T	T	C	C	C	T	T	C	T	T	C	T	C	C	T	T	T	T	T	T	T	T	T	T	T	T	C	T	T	T	T	T	C
	T	C	C	T	C	T	C	T	T	T	T	T	T	T	C	T	T	T	C	C	C	T	T	C	T	T	C	T	C	C	T	T	T	T	T	T	T	T	T	T	T	T	C	T	T	T	T	T	C
PZE-101072150	C	C	C	C	C	T	C	C	C	C	C	C	C	C	C	C	C	C	C	C	C	C	C	C	C	C	C	C	C	C	C	C	C	C	C	C	C	C	C	C	C	C	C	C	C	C	C	C	C
	C	C	C	C	C	T	C	C	C	C	C	C	C	C	C	C	C	C	C	C	C	C	C	C	C	C	C	C	C	C	C	C	C	C	C	C	C	C	C	C	C	C	C	C	C	C	C	C	C
PZE-101072206	T	G	T	T	G	T	G	T	T	G	0	T	T	T	T	T	T	G	T	G	G	T	T	G	G	T	G	G	T	G	G	G	G	T	G	T	T	T	G	G	T	G	G	G	G	G	T	G	0
	T	G	T	T	G	T	G	T	T	G	0	T	T	T	T	T	T	G	T	G	G	T	T	G	G	T	G	G	T	G	G	G	G	T	G	T	T	T	G	G	T	G	G	G	G	G	T	G	0
PZE-101072224	G	G	G	G	G	G	G	G	G	G	0	G	G	G	G	G	G	A	G	A	G	A	G	A	A	G	G	G	G	G	A	G	A	G	G	G	G	G	A	A	G	A	G	G	G	A	G	G	0
	G	G	G	G	G	G	G	G	G	G	0	G	G	G	G	G	G	A	G	A	G	A	G	A	A	G	G	G	G	G	A	G	A	G	G	G	G	G	A	A	G	A	G	G	G	A	G	G	0
PZE-101072259	A	A	C	C	C	C	A	C	C	C	A	C	A	C	C	A	A	A	C	A	A	C	C	A	C	C	A	C	C	A	C	C	A	C	A	A	A	C	A	C	C	C	A	C	C	A	C	C	0
	A	A	C	C	C	C	A	C	C	C	A	C	A	C	C	A	A	A	C	A	A	C	C	A	C	C	A	C	C	A	C	C	A	C	A	A	A	C	A	C	C	C	C	C	C	A	C	C	0
PZE-101072651	T	T	0	T	G	G	T	T	G	T	T	T	T	T	T	T	T	G	G	G	G	T	T	G	G	T	G	G	G	G	T	G	G	G	G	G	G	T	T	G	T	G	G	G	T	T	G	T	T
	T	T	0	T	G	G	T	T	G	T	T	T	T	T	T	T	T	G	G	G	G	T	T	G	G	T	G	G	G	G	T	G	G	G	G	G	G	T	T	G	T	G	G	G	T	T	G	T	T
PZE-101072743	T	T	T	T	T	C	T	T	T	T	T	T	C	T	T	T	T	T	T	T	C	T	T	T	T	T	T	T	T	C	T	T	T	T	T	T	T	T	T	T	C	T	T	T	C	T	T	C	T
	T	T	T	T	T	C	T	T	T	T	T	T	C	T	T	T	T	T	T	T	C	T	T	T	T	T	T	T	T	C	T	T	T	T	T	T	T	T	T	T	C	T	T	T	C	T	T	C	T
PZE-101072744	G	G	G	G	G	A	G	G	G	G	G	G	A	G	G	G	G	G	G	G	A	G	G	G	G	G	G	G	G	A	G	G	G	G	G	G	G	G	G	G	A	G	G	G	A	G	G	A	G
	G	G	G	G	G	A	G	G	G	G	G	G	A	G	G	G	G	G	G	G	A	G	G	G	G	G	G	G	G	A	G	G	G	G	G	G	G	G	G	G	A	G	G	G	A	G	G	A	G
PZE-101072745	T	T	T	T	T	C	T	T	C	T	T	T	C	T	T	T	T	T	T	T	C	T	T	T	T	T	T	T	T	C	T	T	T	T	T	T	C	T	T	T	C	T	T	T	C	T	T	C	T
	T	T	T	T	T	C	T	T	C	T	T	T	C	T	T	T	T	T	T	T	C	T	T	T	T	T	T	T	T	C	T	T	T	T	T	T	C	T	T	T	C	T	T	T	C	C	T	C	T
PZE-101072751	A	G	G	G	A	A	G	G	A	A	G	G	A	G	G	A	A	A	A	A	G	A	A	A	A	A	A	A	A	G	A	A	G	A	A	A	A	A	A	A	A	A	A	A	A	A	A	A	G
	A	G	G	G	A	A	G	G	A	A	G	G	A	G	G	A	A	A	A	A	G	A	A	A	A	A	A	A	A	G	A	A	G	A	A	A	A	A	A	A	A	A	A	A	A	A	A	A	G
PZE-101072783	C	T	T	T	T	T	T	T	C	T	0	T	T	T	T	C	C	T	T	T	T	C	T	T	T	C	T	T	T	T	C	T	T	T	T	T	C	T	T	C	C	T	T	T	C	C	T	C	0
	C	T	T	T	T	T	T	T	C	T	0	T	T	T	T	C	C	T	T	T	T	C	T	T	T	C	T	T	T	T	C	T	T	T	T	T	C	T	T	C	C	T	T	T	C	C	T	C	0
PZE-101072844	C	C	C	C	T	C	C	C	C	C	C	C	C	C	C	C	C	T	C	C	C	C	C	C	C	T	C	C	C	C	T	C	C	T	C	T	C	C	C	C	T	C	C	C	T	T	C	T	C
	C	C	C	C	T	C	C	C	C	C	C	C	C	C	C	C	C	T	C	C	C	C	C	C	C	T	C	C	C	C	T	C	C	T	C	T	C	C	C	C	T	C	C	C	T	T	C	T	C
PZE-101072856	G	G	G	G	G	G	G	G	G	G	A	G	A	G	G	G	G	G	G	G	A	G	G	G	G	G	G	G	G	G	G	A	G	G	G	G	A	G	G	G	G	G	G	G	G	G	G	G	A
	G	G	G	G	G	G	G	G	G	G	A	G	A	G	G	G	G	G	G	G	A	G	G	G	G	G	G	G	G	G	G	A	G	G	G	G	A	G	G	G	G	G	G	G	G	G	G	G	A
PZE-101072870	C	T	C	C	C	C	C	C	0	T	0	C	T	C	T	C	C	C	C	C	T	C	C	C	C	C	C	C	C	C	C	C	C	C	C	C	T	C	C	C	C	C	0	C	C	C	C	C	0
	C	T	C	C	C	C	C	C	0	T	0	C	T	C	T	C	C	C	C	C	T	C	C	C	C	C	C	C	C	C	C	C	C	C	C	C	T	C	C	C	C	C	0	C	C	C	C	C	0
PZE-101073000	C	0	C	C	A	A	C	C	C	C	C	0	C	C	C	C	A	C	0	0	C	C	A	A	A	C	A	0	C	C	C	C	A	A	A	C	C	A	A	A	A	0	C	C	A	C	0	A	C
	C	0	C	C	A	A	C	C	C	C	C	0	C	C	C	C	A	C	0	0	C	C	A	A	A	C	A	0	C	C	C	C	A	A	A	C	C	A	A	A	A	0	C	C	A	C	0	A	C
PZE-101073032	A	A	G	A	G	G	G	G	G	G	G	A	G	G	G	G	G	A	G	A	G	G	A	G	G	A	G	G	G	G	G	G	G	G	G	G	G	A	G	G	G	A	G	G	G	G	G	G	G
	A	A	G	A	G	G	G	G	G	G	G	A	G	G	G	G	G	A	G	A	G	G	A	G	G	A	G	G	G	G	G	G	G	G	G	G	G	A	G	G	G	A	G	G	G	G	G	G	G
PZE-101073078	C	C	T	C	T	T	T	T	T	T	T	C	T	T	T	T	T	C	T	C	T	T	C	T	T	C	T	T	T	T	T	T	T	T	T	T	T	C	T	T	0	C	T	T	T	T	T	T	T
	C	C	T	C	T	T	T	T	T	T	T	C	T	T	T	T	T	C	T	C	T	T	C	T	T	C	T	T	T	T	T	T	T	T	T	T	T	C	T	T	0	C	T	T	T	T	T	T	T
PZE-101073088	C	C	T	C	T	T	T	T	T	T	T	C	T	T	T	T	T	C	T	C	T	T	C	T	T	C	T	T	T	T	T	T	T	T	T	T	T	C	T	T	T	C	T	T	T	T	T	T	T
	C	C	T	C	T	T	T	T	T	T	T	C	T	T	T	T	T	C	T	C	T	T	C	T	T	C	T	T	T	T	T	T	T	T	T	T	T	C	T	T	T	C	T	T	T	T	T	T	T
PZE-101073230	G	G	G	G	G	G	G	G	G	G	G	A	G	G	G	G	G	G	G	A	G	G	G	G	G	G	A	A	A	G	G	A	G	G	A	G	G	G	G	G	G	G	G	A	G	G	A	G	G
	G	G	G	G	G	G	G	G	G	G	G	A	G	G	G	G	G	G	G	A	G	G	G	G	G	G	A	A	A	G	G	A	G	G	A	G	G	G	G	G	G	G	G	A	G	G	A	G	G
PZE-101073233	G	A	G	G	A	G	A	A	G	G	G	A	G	A	A	G	G	A	G	A	A	A	A	G	A	G	0	A	A	A	A	A	G	A	A	G	G	A	G	G	A	A	A	A	G	G	A	G	0
	G	A	G	G	A	G	A	A	G	G	G	A	G	A	A	G	G	A	G	A	A	A	A	G	A	G	0	A	A	A	A	A	G	A	A	G	G	A	G	G	A	A	A	A	G	G	A	G	0
PZE-101073248	A	A	A	A	C	C	A	A	C	A	C	C	A	A	A	A	A	C	A	C	A	A	C	C	C	C	C	C	C	C	C	C	C	A	C	C	C	C	A	A	A	C	A	A	A	A	C	A	A
	A	A	A	A	C	C	A	A	C	A	C	C	A	A	A	A	A	C	A	C	A	A	C	C	C	C	C	C	C	C	C	C	C	A	C	C	C	C	A	A	A	C	A	A	A	A	C	A	A
PZE-101073264	A	A	A	A	A	A	A	A	A	A	A	A	A	A	A	A	A	A	A	A	A	A	A	A	A	A	A	A	A	A	A	A	A	A	A	A	A	A	A	G	A	A	A	A	A	A	A	A	A
	A	A	A	A	A	A	A	A	A	A	A	A	A	A	A	A	A	A	A	A	A	A	A	A	A	A	A	A	A	A	A	A	A	A	A	A	A	A	A	G	A	A	A	A	A	A	A	A	A
PZE-101073380	C	C	A	A	A	A	A	A	A	A	A	A	A	A	C	A	A	A	A	A	A	A	A	A	C	A	A	A	A	A	C	C	A	A	C	A	C	A	A	A	C	C	A	A	A	A	C	A	A
	C	C	A	A	A	A	A	A	A	A	A	A	A	A	C	A	A	A	A	A	A	A	A	A	C	A	A	A	A	A	C	C	A	A	C	A	C	A	A	A	C	C	A	A	A	A	C	A	A
PZE-101073428	G	G	G	G	G	G	G	G	G	G	G	A	G	G	G	G	G	G	G	A	G	G	G	G	G	G	G	A	G	G	G	G	G	G	G	G	G	G	G	G	G	G	G	G	G	G	G	G	G
	G	G	G	G	G	G	G	G	G	G	G	A	G	G	G	G	G	G	G	A	G	G	G	G	G	G	G	A	G	G	G	G	G	G	G	G	G	G	G	G	G	G	G	G	G	G	G	G	G
PZE-101073491	G	G	A	G	G	G	A	A	A	G	A	A	G	A	G	A	G	A	A	A	A	A	G	G	A	G	A	A	A	A	A	A	A	G	A	A	A	G	G	A	A	A	A	A	A	G	A	A	G
	G	G	A	G	G	G	A	A	A	G	A	A	G	A	G	A	G	A	A	A	A	A	G	G	A	G	A	A	A	A	A	A	A	G	A	A	A	G	G	A	A	A	A	A	A	G	A	A	G
PZE-101073492	T	T	G	T	T	T	G	G	G	T	G	G	T	G	T	G	T	G	G	G	G	G	T	T	G	T	G	T	G	G	G	G	G	T	G	G	G	T	T	G	G	G	G	G	G	T	G	G	T
	T	T	G	T	T	T	G	G	G	T	G	G	T	G	T	G	T	G	G	G	G	G	T	T	G	T	G	T	G	G	G	G	G	T	G	G	G	T	T	G	G	G	G	G	G	T	G	G	T
PZE-101073493	A	A	G	A	A	A	G	G	G	A	G	G	A	G	A	G	A	A	G	G	G	G	A	A	G	A	G	A	G	A	G	G	G	A	G	G	G	A	A	G	G	G	G	G	A	A	G	A	A
	A	A	G	A	A	A	G	G	G	A	G	G	A	G	A	G	A	A	G	G	G	G	A	A	G	A	G	A	G	A	G	G	G	A	G	G	G	A	A	G	G	G	G	G	A	A	G	A	A
PZE-101073494	C	C	T	C	C	T	C	C	0	C	C	C	T	C	C	C	C	T	C	C	T	C	T	T	C	T	C	T	C	T	C	C	C	C	C	C	C	T	C	C	C	C	C	C	C	C	C	C	T
	C	C	T	C	C	T	C	C	0	C	C	C	T	C	C	C	C	T	C	C	T	C	T	T	C	T	C	T	C	T	C	C	C	C	C	C	C	T	C	C	C	C	C	C	C	C	C	C	T
PZE-101073495	A	A	A	G	G	A	G	G	G	G	G	G	G	G	A	G	A	A	G	G	A	G	G	G	A	G	G	A	G	A	A	G	G	G	G	G	A	G	G	G	A	A	G	G	G	G	G	G	G
	A	A	A	G	G	A	G	G	G	G	G	G	G	G	A	G	A	A	G	G	A	G	G	G	A	G	G	A	G	A	A	G	G	G	G	G	A	G	G	G	A	A	G	G	G	G	G	G	G
PZE-101073593	G	A	A	A	A	A	A	G	G	A	0	A	G	G	G	G	A	A	G	A	G	A	A	A	A	A	G	A	A	G	A	G	G	G	A	G	G	A	G	G	G	A	G	G	G	0	G	G	G
	G	A	A	A	A	A	A	G	G	A	0	A	G	G	G	G	A	A	G	A	G	A	A	A	A	A	G	A	A	G	A	G	G	G	A	G	G	A	G	G	G	A	G	G	G	0	G	G	G
PZE-101073696	C	C	C	T	C	C	C	T	C	T	C	C	C	T	C	C	C	C	C	C	C	T	T	T	T	C	T	T	C	T	C	T	C	T	T	T	C	T	C	T	T	T	C	T	T	T	T	T	T
	C	C	C	T	C	C	C	T	C	T	C	C	C	T	C	C	C	C	C	C	C	T	T	T	T	C	T	T	C	T	C	T	C	T	T	T	C	T	C	T	T	T	C	T	T	T	T	T	T
PZE-101073762	C	C	C	C	A	A	C	C	A	A	C	C	C	C	A	C	A	C	C	C	A	C	C	C	C	C	C	C	C	C	C	C	A	C	C	C	C	C	C	C	C	C	A	C	A	C	C	A	C
	C	C	C	C	A	A	C	C	A	A	C	C	C	C	A	C	A	C	C	C	A	C	C	C	C	C	C	C	C	C	C	C	A	C	C	C	C	C	C	C	C	C	A	C	A	C	C	A	C
PZE-101074011	G	G	G	G	G	G	G	T	G	T	G	G	G	T	G	G	G	G	G	T	T	T	G	G	T	G	G	T	T	G	G	T	T	T	T	G	T	G	G	T	T	T	G	G	G	G	T	T	G
	G	G	G	G	G	G	G	T	G	T	G	G	G	T	G	G	G	G	G	T	T	T	G	G	T	G	G	T	T	G	G	T	T	T	T	G	T	G	G	T	T	T	G	G	G	G	T	T	G
PZE-101074049	C	C	C	C	C	C	C	A	C	A	0	C	C	A	C	C	C	C	A	A	A	A	A	A	A	C	C	A	A	C	C	A	A	A	A	A	A	A	A	A	A	A	C	C	C	A	A	A	0
	C	C	C	C	C	C	C	A	C	A	0	C	C	A	C	C	C	C	A	A	A	A	A	A	A	C	C	A	A	C	C	A	A	A	A	A	A	A	A	A	A	A	C	C	C	A	A	A	0
PZE-101074193	C	C	T	T	T	T	C	C	T	T	C	C	C	T	T	C	C	T	C	C	C	C	C	C	C	C	T	C	C	C	C	C	C	C	C	C	C	C	C	C	C	C	T	C	T	C	C	C	C
	C	C	T	T	T	T	C	C	T	T	C	C	C	T	T	C	C	T	C	C	C	C	C	C	C	C	T	C	C	C	C	C	C	C	C	C	C	C	C	C	C	C	T	C	T	C	C	C	C
PZE-101074278	T	T	T	T	T	T	T	T	T	T	0	T	T	T	T	T	T	T	C	T	C	C	0	T	T	C	T	T	C	T	C	T	T	C	T	T	T	C	T	C	T	C	T	T	T	T	C	C	0
	T	T	T	T	T	T	T	T	T	T	0	T	T	T	T	T	T	T	C	T	C	C	0	T	T	C	T	T	C	T	C	T	T	C	T	T	T	C	T	C	T	C	T	T	T	T	C	C	0
PZE-101074357	C	T	C	C	C	C	T	C	C	C	T	T	C	C	C	T	C	T	C	C	T	C	T	C	C	T	C	0	T	C	T	0	C	T	C	T	0	T	T	C	T	T	C	C	T	T	T	T	T
	C	T	C	C	C	C	T	C	C	C	T	T	C	C	C	T	C	T	C	C	T	C	T	C	C	T	C	0	T	C	T	0	C	T	C	T	0	T	T	C	T	T	C	C	T	T	T	T	T
PZE-101074451	G	G	G	A	G	G	G	A	G	A	G	G	G	G	A	G	G	G	G	A	G	G	G	G	G	G	A	G	G	G	G	G	G	G	G	G	G	G	G	G	G	G	G	G	G	G	G	G	G
	G	G	G	A	G	G	G	A	G	A	G	G	G	G	A	G	G	G	G	A	G	G	G	G	G	G	A	G	G	G	G	G	G	G	G	G	G	G	G	G	G	G	G	G	G	G	G	G	G
PZE-101074547	G	G	G	G	T	G	G	G	G	G	0	G	G	G	G	G	G	G	G	G	G	G	G	G	G	G	G	T	G	T	G	G	G	T	G	G	G	G	G	G	G	G	T	G	G	G	T	G	G
	G	G	G	G	T	G	G	G	G	G	0	G	G	G	G	G	G	G	G	G	G	G	G	G	G	G	G	T	G	T	G	G	G	G	G	G	G	G	G	G	G	G	T	G	G	G	T	G	G
PZE-101074541	A	A	A	A	G	A	A	A	A	A	G	A	A	A	A	A	A	G	A	A	A	A	A	A	A	A	A	G	A	G	A	A	A	A	A	A	A	A	G	A	A	A	G	A	A	A	G	A	A
	A	A	A	A	G	A	A	A	A	A	G	A	A	A	A	A	A	G	A	A	A	A	A	A	A	A	A	G	A	G	A	A	A	G	A	A	A	A	G	A	A	A	G	A	A	A	G	A	A
PZE-101074529	T	T	T	T	G	T	T	T	T	T	G	G	T	T	T	T	T	G	T	T	T	T	T	T	T	G	T	G	T	G	T	T	T	T	T	T	T	T	G	T	T	T	G	T	T	T	G	T	T
	T	T	T	T	G	T	T	T	T	T	G	G	T	T	T	T	T	G	T	T	T	T	T	T	T	G	T	G	T	G	T	T	T	G	T	T	T	T	G	T	T	T	G	T	T	T	G	T	T
PZE-101074562	A	A	A	A	T	A	A	A	A	A	0	A	A	A	A	A	A	T	A	A	A	A	A	A	A	A	A	T	A	T	A	A	A	A	A	A	A	A	T	A	A	A	T	A	A	A	T	A	A
	A	A	A	A	T	A	A	A	A	A	0	A	A	A	A	A	A	T	A	A	A	A	A	A	A	A	A	T	A	T	A	A	A	T	A	A	A	A	T	A	A	A	T	A	A	A	T	A	A
PZE-101074618	G	G	G	G	G	G	G	G	G	G	0	G	G	G	G	G	G	G	G	G	G	G	G	G	G	G	G	G	A	G	G	A	G	A	G	G	G	G	G	G	A	G	A	G	G	G	G	G	G
	G	G	G	G	G	G	G	G	G	G	0	G	G	G	G	G	G	G	G	G	G	G	G	G	G	G	G	G	A	G	G	A	G	G	G	G	G	G	G	G	A	G	A	G	G	G	G	G	G
PZE-101074651	C	C	C	C	0	C	C	T	C	C	C	C	T	C	C	C	C	C	C	T	C	T	T	T	C	C	C	C	T	C	T	C	C	T	C	C	C	T	C	C	T	T	C	C	C	C	T	C	C
	C	C	C	C	0	C	C	T	C	C	C	C	T	C	C	C	C	C	C	T	C	T	T	T	C	C	C	C	T	C	T	C	C	C	C	C	C	T	C	C	T	T	C	C	C	C	T	C	C
PZE-101074699	A	A	A	A	A	G	G	A	A	G	0	G	G	A	G	G	A	G	G	G	A	G	A	A	G	G	A	G	A	G	A	G	G	G	G	G	A	A	A	G	A	A	A	G	G	G	G	G	G
	A	A	A	A	A	G	G	A	A	G	0	G	G	A	G	G	A	G	G	G	A	G	A	A	G	G	A	G	A	G	A	G	G	G	G	G	A	A	A	G	A	A	A	G	G	G	G	G	G
PZE-101074731	C	C	C	C	0	C	T	T	C	C	C	T	C	C	T	C	C	T	C	C	C	C	T	T	C	T	C	C	T	C	T	0	T	T	0	T	0	T	T	C	T	T	C	C	C	C	C	C	C
	C	C	C	C	0	C	T	T	C	C	C	T	C	C	T	C	C	T	C	C	C	C	T	T	C	T	C	C	T	C	T	0	T	C	0	T	0	T	T	C	T	T	C	C	C	C	C	C	C
PZE-101074779	T	G	G	G	T	T	T	T	G	T	T	T	T	T	T	T	G	T	T	T	G	T	T	T	T	T	G	T	T	T	T	T	T	T	T	T	G	T	T	T	T	T	T	T	T	T	T	T	T
	T	G	G	G	T	T	T	T	G	T	T	T	T	T	T	T	G	T	T	T	G	T	T	T	T	T	G	T	T	T	T	T	T	T	T	T	G	T	T	T	T	T	T	T	T	T	T	T	T
PZE-101074821	G	G	G	G	G	G	G	G	G	G	G	G	G	G	G	G	G	G	G	G	G	G	G	G	G	G	G	A	G	G	G	A	G	A	G	G	G	G	G	G	G	G	G	G	G	G	G	G	G
	G	G	G	G	G	G	G	G	G	G	G	G	G	G	G	G	G	G	G	G	G	G	G	G	G	G	G	A	G	G	G	A	G	G	G	G	G	G	G	G	G	G	G	G	G	G	G	G	G
PZE-101074835	T	T	T	T	T	T	T	T	T	T	T	T	T	T	T	T	T	T	T	T	T	T	T	T	T	T	T	C	T	T	T	C	T	T	T	T	T	T	C	T	C	T	T	T	T	T	T	T	T
	T	T	T	T	T	T	T	T	T	T	T	T	T	T	T	T	T	T	T	T	T	T	T	T	T	T	T	C	T	T	T	C	T	C	T	T	T	T	C	T	C	T	T	T	T	T	T	T	T
PZE-101074852	T	G	G	G	G	G	G	G	G	G	0	G	G	T	G	G	G	G	G	T	G	G	G	G	G	G	G	G	G	G	G	G	G	G	G	G	G	G	T	G	T	G	T	G	G	G	G	G	G
	T	G	G	G	G	G	G	G	G	G	0	G	G	T	G	G	G	G	G	T	G	G	G	G	G	G	G	G	G	G	G	G	G	G	G	G	G	G	T	G	T	G	T	G	G	G	G	G	G
PZE-101074929	A	A	A	A	A	A	A	G	G	A	A	A	A	A	A	A	A	A	A	A	A	A	A	A	A	A	G	A	A	A	A	A	A	A	A	A	G	A	A	A	A	A	G	A	A	A	A	A	A
	A	A	A	A	A	A	A	G	G	A	A	A	A	A	A	A	A	A	A	A	A	A	A	A	A	A	G	A	A	A	A	A	A	A	A	A	G	A	A	A	A	A	G	A	A	A	A	A	A
PZE-101074998	A	G	A	A	G	G	A	G	A	A	G	A	A	A	A	G	A	A	G	G	G	G	G	G	A	A	G	G	G	G	G	G	G	A	G	G	A	G	G	A	A	G	G	G	G	0	G	G	G
	A	G	A	A	G	G	A	G	A	A	G	A	A	A	A	G	A	A	G	G	G	G	G	G	A	A	G	G	G	G	G	G	G	G	G	G	A	G	G	A	A	G	G	G	G	0	G	G	G
PZE-101075062	T	T	T	T	G	T	T	T	T	T	T	T	G	T	T	T	T	G	T	G	T	T	G	T	G	G	T	G	G	T	T	T	G	0	T	G	T	G	T	T	T	G	T	T	T	0	G	G	T
	T	T	T	T	G	T	T	T	T	T	T	T	G	T	T	T	T	G	T	G	T	T	G	T	G	G	T	G	G	T	T	T	G	0	T	G	T	G	T	T	T	G	T	T	T	0	G	G	T
PZE-101075081	C	C	C	C	T	C	C	C	C	C	C	C	T	C	C	C	C	C	C	T	C	C	T	C	T	T	0	T	T	T	C	C	C	C	C	C	C	T	C	C	C	T	C	C	C	C	T	T	C
	C	C	C	C	T	C	C	C	C	C	C	C	T	C	C	C	C	C	C	T	C	C	T	C	T	T	0	T	T	T	C	C	C	C	C	C	C	T	C	C	C	T	C	C	C	C	T	T	C
PZE-101075097	C	T	C	C	T	C	C	C	C	C	C	C	T	C	C	C	C	T	C	T	C	T	T	T	T	T	C	T	T	T	T	C	T	T	C	C	C	T	T	C	C	T	C	T	T	C	T	T	C
	C	T	C	C	T	C	C	C	C	C	C	C	T	C	C	C	C	T	C	T	C	T	T	T	T	T	C	T	T	T	T	C	T	C	C	C	C	T	T	C	C	T	C	T	T	C	T	T	C
PZE-101075177	G	G	A	A	G	G	A	G	0	G	A	G	A	G	G	G	A	A	A	A	A	A	G	A	A	A	G	A	A	A	A	A	A	G	G	A	A	G	G	A	G	A	G	A	G	G	G	G	G
	G	G	A	A	G	G	A	G	0	G	A	G	A	G	G	G	A	A	A	A	A	A	G	A	A	A	G	A	A	A	A	A	A	G	G	A	A	G	G	A	G	A	G	A	G	G	G	G	G
PZE-101075225	G	G	G	G	G	G	A	G	G	G	G	G	A	G	A	0	G	A	G	G	G	G	G	A	A	G	0	G	A	A	A	G	A	G	A	A	G	G	A	G	A	A	G	G	G	G	G	A	0
	G	G	G	G	G	G	G	G	G	G	G	G	A	G	A	0	G	G	G	G	G	G	G	A	A	G	0	G	A	A	A	G	A	G	A	A	G	G	A	G	G	A	G	G	G	G	G	A	0
PZE-101075295	C	C	A	C	A	C	C	0	C	C	C	C	C	C	A	A	C	C	C	C	C	C	0	C	C	C	A	C	C	A	C	0	C	C	A	A	C	0	C	C	C	C	A	C	0	A	A	0	A
	C	C	A	C	A	C	C	0	C	C	C	C	C	C	A	A	C	C	C	C	C	C	0	C	C	C	A	C	C	A	C	0	C	C	A	A	C	0	C	C	C	C	A	C	0	A	A	0	A
PZE-101075396	T	T	T	T	C	T	T	T	T	T	T	T	T	T	T	T	T	T	T	T	T	T	T	T	T	T	T	T	T	T	T	T	T	T	T	C	T	T	T	T	T	T	T	T	C	T	C	T	T
	T	T	T	T	C	T	T	T	T	T	T	T	T	T	T	T	T	T	T	T	T	T	T	T	T	T	T	T	T	T	T	T	T	C	T	C	T	T	T	T	T	T	T	T	C	T	C	T	T
PZE-101075379	G	G	G	T	G	T	G	G	T	G	T	T	G	G	G	G	T	G	T	G	T	T	T	T	G	G	G	G	G	G	T	T	G	G	G	G	T	T	G	T	T	G	T	G	G	G	G	T	G
	G	G	G	T	G	T	G	G	T	G	T	T	G	G	G	G	T	G	T	G	T	T	T	T	G	G	G	G	G	G	T	T	G	G	G	G	T	T	G	T	T	G	T	G	G	G	G	T	G
PZE-101075378	A	A	A	G	G	G	A	A	G	A	G	G	A	A	G	A	G	A	G	A	G	G	G	G	A	A	A	A	A	A	G	G	A	A	A	G	G	G	A	G	G	A	G	A	G	G	G	G	A
	A	A	A	G	G	G	A	A	G	A	G	G	A	A	G	A	G	A	G	A	G	G	G	G	A	A	A	A	A	A	G	G	A	G	A	G	G	G	A	G	G	A	G	A	G	G	G	G	G
PZE-101075340	G	G	G	A	G	A	G	G	A	G	A	A	G	G	A	G	A	G	A	G	A	A	A	A	G	G	G	G	G	G	A	A	G	G	G	G	A	A	G	A	A	G	A	G	G	A	G	A	0
	G	G	G	A	G	A	G	G	A	G	A	A	G	G	A	G	A	G	A	G	A	A	A	A	G	G	G	G	G	G	A	A	G	G	G	G	A	A	G	A	A	G	A	G	G	A	G	A	0
PZE-101075334	A	A	A	G	A	G	A	A	G	A	G	G	A	A	A	A	G	A	G	A	G	G	G	G	A	A	A	A	A	A	G	G	A	A	A	A	G	G	A	G	G	A	G	A	A	A	A	G	A
	A	A	A	G	A	G	A	A	G	A	G	G	A	A	A	A	G	A	G	A	G	G	G	G	A	A	A	A	A	A	G	G	A	A	A	A	G	G	A	G	G	A	G	A	A	A	A	G	A
PZE-101075333	G	G	G	T	G	T	G	G	T	G	T	T	G	G	G	G	T	G	T	G	T	T	T	T	G	G	G	G	G	G	T	T	G	G	G	G	T	T	G	T	T	G	T	G	G	G	G	T	G
	G	G	G	T	G	T	G	G	T	G	T	T	G	G	G	G	T	G	T	G	T	T	T	T	G	G	G	G	G	G	T	T	G	G	G	G	T	T	G	T	T	G	T	G	G	G	G	T	G
PZE-101075328	A	A	A	G	G	G	A	A	G	A	G	G	A	A	A	A	G	A	G	A	G	G	G	G	A	A	A	A	A	A	G	G	A	A	A	G	G	G	A	G	G	A	G	A	G	A	G	G	A
	A	A	A	G	G	G	A	A	G	A	G	G	A	A	A	A	G	A	G	A	G	G	G	G	A	A	A	A	A	A	G	G	A	G	A	G	G	G	A	G	G	A	G	A	G	A	G	G	A
PZE-101075411	G	G	A	G	G	A	G	G	G	G	G	G	G	G	G	G	G	G	G	G	G	G	A	G	A	G	G	G	A	G	G	G	G	G	G	G	A	A	G	G	G	G	G	G	G	G	G	A	G
	G	G	A	G	G	A	G	G	G	G	G	G	G	G	G	G	G	G	G	G	G	G	A	G	A	G	G	G	A	G	G	G	G	G	G	G	A	A	G	G	G	G	G	G	G	G	G	A	G
PZE-101075523	T	T	G	G	G	G	T	T	G	T	G	G	T	T	G	T	G	T	G	T	G	G	G	G	G	T	T	T	G	T	G	G	T	T	T	G	G	G	T	G	G	T	G	T	T	T	G	G	T
	T	T	G	G	G	G	T	T	G	T	G	G	T	T	G	T	G	T	G	T	G	G	G	G	G	T	T	T	G	T	G	G	T	G	T	G	G	G	T	G	G	T	G	T	T	T	G	G	T
PZE-101075629	0	0	A	G	G	A	0	0	G	0	G	G	G	0	G	G	G	0	G	A	G	G	G	A	G	G	G	G	G	G	G	G	A	0	G	G	A	G	G	G	G	G	G	G	G	G	0	A	G
	0	0	A	G	G	A	0	0	G	0	G	G	G	0	G	G	G	0	G	A	G	G	G	A	G	G	G	G	G	G	G	G	A	0	G	G	A	G	G	G	G	G	G	G	G	G	0	A	G
PZE-101075630	A	A	A	A	C	A	A	A	A	A	A	A	A	A	C	A	A	A	A	A	A	A	A	A	C	A	A	A	C	A	A	A	A	A	A	A	A	A	A	A	A	A	A	A	A	A	A	A	A
	A	A	A	A	C	A	A	A	A	A	A	A	A	A	C	A	A	A	A	A	A	A	A	A	C	A	A	A	C	A	A	A	A	A	A	A	A	A	A	A	A	A	A	A	A	A	A	A	A
PZE-101075778	C	C	C	C	C	C	C	C	C	C	C	C	C	C	T	T	C	C	T	C	C	C	T	T	C	C	T	C	C	T	C	C	C	T	T	T	C	T	T	T	C	T	C	C	C	T	C	T	0
	C	C	C	C	C	C	C	C	C	C	C	C	C	C	T	T	C	C	T	C	C	C	T	T	C	C	T	C	C	T	C	C	C	C	T	T	C	T	T	T	C	T	C	C	C	T	C	T	0
PZE-101075790	G	G	G	A	A	A	G	G	A	G	G	A	A	G	G	A	G	G	A	G	G	A	A	A	G	G	A	G	G	A	G	G	G	A	A	A	A	A	A	A	G	G	G	G	G	A	G	A	G
	G	G	G	A	A	A	G	G	A	G	G	A	A	G	G	A	G	G	A	G	G	A	A	A	G	G	A	G	G	A	G	G	G	G	A	A	A	A	A	A	G	G	G	G	G	A	G	A	G
PZE-101075843	A	A	A	G	G	A	A	A	G	A	G	G	A	G	G	A	A	A	A	A	G	G	G	G	A	A	A	A	G	A	A	G	G	A	A	G	G	G	G	A	G	A	A	G	A	A	A	A	0
	A	A	A	G	G	A	A	A	G	A	G	G	A	G	G	A	A	A	A	A	G	G	G	G	A	A	A	A	G	A	A	G	G	A	A	G	G	G	G	A	G	A	A	G	A	A	A	A	0
PZE-101075844	A	A	A	0	0	A	A	A	A	A	0	0	A	0	0	A	A	A	A	A	A	0	A	A	A	A	A	A	G	A	A	0	G	A	A	A	A	A	G	A	A	A	A	A	A	A	A	A	A
	A	A	A	0	0	A	A	A	A	A	0	0	A	0	0	A	A	A	A	A	A	0	A	A	A	A	A	A	G	A	A	0	G	A	A	A	A	A	G	A	A	A	A	A	A	A	A	A	A
PZE-101075931	A	A	A	A	A	A	G	A	G	A	A	A	A	A	G	A	A	A	A	A	G	G	G	A	A	A	A	G	G	A	A	A	A	A	A	A	G	G	G	A	A	A	A	A	G	A	G	A	G
	A	A	A	A	A	A	G	A	G	A	A	A	A	A	G	A	A	A	A	A	G	G	G	A	A	A	A	G	G	A	A	A	A	G	A	A	G	G	G	A	A	A	A	A	G	A	G	A	G
PZE-101076213	A	G	G	G	A	A	G	G	A	G	0	G	A	G	G	G	G	A	A	A	A	A	A	0	G	A	A	G	A	G	0	0	G	G	G	G	G	A	G	A	0	G	G	G	A	A	G	A	A
	A	G	G	G	A	A	G	G	A	G	0	G	A	G	G	G	G	A	A	A	A	A	A	0	G	A	A	G	A	G	0	0	G	G	G	G	G	A	G	A	0	G	G	G	A	A	G	A	A
PZE-101076600	A	A	A	A	C	A	C	C	A	A	A	A	A	C	A	A	A	A	A	A	A	A	A	C	C	C	C	A	A	A	A	C	A	A	A	C	A	A	A	A	C	A	A	A	A	C	A	A	0
	A	A	A	A	C	A	C	C	A	A	A	A	A	C	A	A	A	A	A	A	A	A	A	C	C	C	C	A	A	A	A	C	A	A	A	C	A	A	A	A	C	A	A	A	A	C	A	A	0
PZE-101076601	C	T	C	C	C	C	C	C	T	C	0	C	T	C	C	T	T	C	T	C	T	C	C	C	C	C	C	C	C	C	C	C	C	C	C	C	T	C	C	T	C	C	T	C	C	C	C	C	C
	C	T	C	C	C	C	C	C	T	C	0	C	T	C	C	T	T	C	T	C	T	C	C	C	C	C	C	C	C	C	C	C	C	C	C	C	T	C	C	T	C	C	T	C	C	C	C	C	C
PZE-101076640	A	A	A	G	A	G	G	A	0	A	0	G	A	A	G	A	A	A	A	G	A	G	G	G	A	G	A	G	G	G	G	G	G	G	G	0	A	G	A	A	G	G	0	G	G	G	G	A	G
	A	A	A	G	A	G	G	A	0	A	0	G	A	A	G	A	A	A	A	G	A	G	G	G	A	G	A	G	G	G	G	G	G	G	G	0	A	G	A	A	G	G	0	G	G	G	G	A	G
PZE-101076732	T	T	T	T	T	T	T	T	T	T	T	T	T	T	T	T	T	T	T	T	T	T	T	T	T	T	T	T	C	T	C	T	T	C	T	T	T	T	T	T	T	T	T	T	T	T	T	T	T
	T	T	T	T	T	T	T	T	T	T	T	T	T	T	T	T	T	T	T	T	T	T	T	T	T	T	T	T	C	T	C	T	T	C	T	T	T	T	T	T	T	T	T	T	T	T	T	T	T
PZE-101076734	A	A	A	A	A	G	A	A	A	A	G	A	A	A	A	A	A	A	A	A	A	G	A	G	A	A	G	A	G	A	G	A	A	G	A	A	A	A	A	A	A	A	A	A	A	A	G	A	A
	A	A	A	A	A	G	A	A	A	A	G	A	A	A	A	A	A	A	A	A	A	G	A	G	A	A	G	A	G	A	G	A	A	G	A	A	A	A	A	A	A	A	A	A	A	A	G	A	A
PZE-101076878	T	T	T	T	T	T	T	T	C	T	T	T	C	T	C	T	C	T	C	T	C	T	T	T	T	T	T	T	T	T	T	T	T	C	T	T	T	T	T	T	T	T	T	T	T	T	T	T	0
	T	T	T	T	T	T	T	T	C	T	T	T	C	T	C	T	C	T	C	T	C	T	T	T	T	T	T	T	T	T	T	T	T	C	T	T	T	T	T	T	T	T	T	T	T	T	T	T	0
PZE-101076881	A	A	G	A	A	A	A	A	A	A	A	G	A	A	A	G	A	A	G	G	G	A	A	A	A	A	A	A	A	A	A	A	A	A	A	A	A	A	A	G	A	A	G	G	G	A	A	A	0
	A	A	G	A	A	A	A	A	A	A	A	G	A	A	A	G	A	A	G	G	G	A	A	A	A	A	A	A	A	A	A	A	A	A	A	A	G	A	A	G	A	A	G	G	G	A	A	A	0
PZE-101076890	G	G	A	G	G	G	G	G	0	G	G	A	A	G	A	A	A	G	G	A	G	G	G	G	G	G	G	G	G	G	G	G	G	A	G	G	A	G	G	A	G	G	A	A	A	G	G	G	G
	G	G	A	G	G	G	G	G	0	G	G	A	A	G	A	A	A	G	G	A	G	G	G	G	G	G	G	G	G	G	G	G	G	A	G	G	G	G	G	A	G	G	A	A	A	G	G	G	G
PZE-101076915	T	C	C	C	T	C	C	C	C	T	C	T	C	C	T	C	C	C	C	T	C	C	C	0	T	T	C	C	T	C	C	C	C	C	T	T	C	C	T	C	T	T	C	C	C	T	C	C	0
	T	C	C	C	T	C	C	C	C	T	C	T	C	C	T	C	C	C	C	T	C	C	C	0	T	T	C	C	T	C	C	C	C	C	T	T	C	C	T	C	T	T	C	C	C	T	C	C	0
PZE-101076940	0	T	T	T	C	T	T	T	T	0	T	C	T	T	T	T	T	T	T	C	T	T	T	0	C	T	T	T	0	T	T	T	T	T	T	C	T	T	0	T	0	0	T	T	T	0	T	T	T
	0	T	T	T	C	T	T	T	T	0	T	C	T	T	T	T	T	T	T	C	T	T	T	0	C	T	T	T	0	T	T	T	T	T	T	C	T	T	0	T	0	0	T	T	T	0	T	T	T
PZE-101076941	C	C	C	C	C	C	C	C	C	C	C	C	C	C	C	C	C	C	C	C	C	C	C	T	C	C	0	C	T	C	C	C	C	C	C	C	C	C	T	C	T	T	C	C	C	T	C	C	0
	C	C	C	C	C	C	C	C	C	C	C	C	C	C	C	C	C	C	C	C	C	C	C	T	C	C	0	C	T	C	C	C	C	C	C	C	C	C	T	C	T	T	C	C	C	T	C	C	0
PZE-101076946	G	A	A	A	G	A	A	A	A	G	A	G	A	A	A	A	A	A	A	G	A	A	A	G	G	A	A	A	G	A	A	A	A	A	A	G	A	A	G	A	G	G	A	A	A	G	A	A	0
	G	A	A	A	G	A	A	A	A	G	A	G	A	A	A	A	A	A	A	G	A	A	A	G	G	A	A	A	G	A	A	A	A	A	A	G	A	A	G	A	G	G	A	A	A	G	A	A	0
PZE-101076969	A	A	A	A	A	A	A	A	G	G	0	0	A	A	A	G	A	A	0	0	0	0	A	A	A	G	A	0	A	A	A	A	A	0	A	A	G	A	G	G	A	A	G	A	A	A	A	A	A
	A	A	A	A	A	A	A	A	G	G	0	0	A	A	A	G	A	A	0	0	0	0	A	A	A	G	A	0	A	A	A	A	A	0	A	A	G	A	G	G	A	A	G	A	A	A	A	A	A
PZE-101076999	C	C	C	C	C	C	C	C	C	C	C	C	C	C	C	C	C	C	C	C	A	C	C	A	A	C	C	C	C	C	C	C	C	C	C	C	C	C	C	C	C	C	C	C	C	C	C	C	C
	C	C	C	C	C	C	C	C	C	C	C	C	C	C	C	C	C	C	C	C	A	C	C	A	A	C	C	C	C	C	C	C	C	C	C	C	C	C	C	C	C	C	C	C	C	C	C	C	C
PZE-101077003	G	G	A	G	A	A	A	G	A	A	A	A	A	G	A	A	A	A	A	A	G	A	A	G	G	A	A	A	A	A	A	A	A	A	A	A	A	A	A	A	A	A	A	A	A	A	A	A	A
	G	G	A	G	A	A	A	G	A	A	A	A	A	G	A	A	A	A	A	A	G	A	A	G	G	A	A	A	A	A	A	A	A	A	A	A	A	A	A	A	A	A	A	A	A	A	A	A	A
PZE-101077005	C	C	C	C	T	C	C	C	C	C	C	0	C	C	C	C	C	T	C	T	C	C	C	C	C	T	C	T	T	C	C	C	C	T	C	C	C	C	T	C	T	T	C	C	C	T	T	C	0
	C	C	C	C	T	C	C	C	C	C	C	0	C	C	C	C	C	T	C	T	C	C	C	C	C	T	C	T	T	C	C	C	C	T	C	C	C	C	T	C	T	T	C	C	C	T	T	C	0
PZE-101077008	C	C	C	C	T	C	C	C	C	C	C	T	T	C	C	C	C	T	C	T	C	T	T	C	C	T	C	T	T	T	T	T	T	T	C	T	C	T	T	C	T	T	C	C	C	T	T	T	C
	C	C	C	C	T	C	C	C	C	C	C	T	T	C	C	C	C	T	C	T	C	T	T	C	C	T	C	T	T	T	T	T	T	T	C	T	C	T	T	C	T	T	C	C	C	T	T	T	C
PZE-101077013	G	G	G	G	G	G	G	G	G	G	G	G	G	G	G	G	G	A	G	G	G	G	G	G	G	G	G	A	G	G	G	G	G	A	G	G	G	G	G	G	G	A	G	G	G	G	A	G	0
	G	G	G	G	G	G	G	G	G	G	G	G	G	G	G	G	G	A	G	G	G	G	G	G	G	G	G	A	G	G	G	G	G	A	G	G	G	G	G	G	G	A	G	G	G	G	A	G	0
PZE-101077016	C	C	C	C	T	C	C	C	C	C	0	T	T	C	C	C	C	T	C	T	C	T	T	C	C	T	C	T	T	T	T	T	T	T	C	T	C	T	T	C	T	T	C	C	C	T	T	T	0
	C	C	C	C	T	C	C	C	C	C	0	T	T	C	C	C	C	T	C	T	C	T	T	C	C	T	C	T	T	T	T	T	T	T	C	T	C	T	T	C	T	T	C	C	C	T	T	T	0
PZE-101077213	A	A	A	A	C	A	A	A	A	A	0	A	A	A	A	C	A	A	0	A	0	A	C	A	A	A	A	A	C	A	C	A	A	A	C	A	A	C	A	A	A	A	A	A	A	A	C	A	A
	A	A	A	A	C	A	A	A	A	A	0	A	A	A	A	C	A	A	0	A	0	A	C	A	A	A	A	A	C	A	C	A	A	A	C	A	A	C	A	A	A	A	A	A	A	A	C	A	A
PZE-101077242	G	G	G	G	A	G	G	G	G	G	0	G	G	G	G	A	G	G	A	G	A	G	A	G	G	G	G	G	A	G	A	G	G	G	A	G	G	A	G	G	G	G	G	G	G	G	A	G	G
	G	G	G	G	A	G	G	G	G	G	0	G	G	G	G	A	G	G	A	G	A	G	A	G	G	G	G	G	A	G	A	G	G	G	A	G	G	A	G	G	G	G	G	G	G	G	A	G	G
PZE-101077314	T	T	T	T	T	T	C	T	T	T	C	T	T	T	C	T	C	T	T	T	T	T	T	T	T	T	C	T	T	T	T	T	T	T	C	T	T	T	T	C	T	T	T	T	T	T	T	T	T
	T	T	T	T	T	T	C	T	T	T	C	T	T	T	C	T	C	T	T	T	T	T	T	T	T	T	C	T	T	T	T	T	T	T	C	T	T	T	T	C	T	T	T	T	T	T	T	T	T
PZE-101077385	T	T	T	T	T	T	C	T	T	T	0	T	T	T	C	T	C	T	C	T	T	T	T	T	T	T	C	T	T	T	T	T	T	C	C	T	T	T	T	C	T	T	T	T	T	T	T	T	T
	T	T	T	T	T	T	C	T	T	T	0	T	T	T	C	T	C	T	C	T	T	T	T	T	T	T	C	T	T	T	T	T	T	C	C	T	T	T	T	C	T	T	T	T	T	T	T	T	T
PZE-101077388	A	A	A	A	A	A	A	A	A	A	A	A	A	A	A	A	A	A	A	A	A	A	A	A	A	A	A	A	A	A	A	A	A	G	A	A	A	A	A	A	A	A	A	A	A	A	A	A	0
	A	A	A	A	A	A	A	A	A	A	A	A	A	A	A	A	A	A	A	A	A	A	A	A	A	A	A	A	A	A	A	A	A	G	A	A	A	A	A	A	A	A	A	A	A	A	A	A	0
PZE-101077491	C	C	T	C	C	T	T	C	C	C	C	T	T	C	T	T	T	C	T	T	C	T	C	C	C	C	T	C	C	T	C	C	C	C	C	C	C	C	C	T	C	T	T	T	T	C	T	C	C
	C	C	T	C	C	T	T	C	C	C	C	T	T	C	T	T	T	C	T	T	C	T	C	C	C	C	T	C	C	T	C	C	C	C	C	C	C	C	C	T	C	T	T	T	T	C	T	C	C
PZE-101077530	T	T	C	T	T	T	T	T	T	T	T	C	C	C	C	C	C	T	T	T	C	T	T	T	T	T	C	T	T	C	T	T	T	T	C	T	C	T	T	C	T	T	C	T	T	T	T	T	C
	T	T	C	T	T	T	T	T	T	T	T	C	C	C	C	C	C	T	T	T	C	T	T	T	T	T	C	T	T	C	T	T	T	T	C	T	C	T	T	C	T	T	C	T	T	T	T	T	C
PZE-101077537	T	T	G	T	T	T	T	T	T	T	T	G	G	G	G	G	G	T	T	T	G	T	T	T	T	T	G	T	T	G	T	T	T	T	G	T	G	T	T	T	T	T	G	T	T	T	T	T	G
	T	T	G	T	T	T	T	T	T	T	T	G	G	G	G	G	G	T	T	T	G	T	T	T	T	T	G	T	T	G	T	T	T	T	G	T	G	T	T	T	T	T	G	T	T	T	T	T	G
PZE-101077708	A	A	A	A	A	A	A	A	A	A	A	G	A	A	G	A	G	A	A	A	G	A	A	G	G	A	A	A	G	A	G	A	A	A	A	A	G	A	A	A	A	G	A	G	G	A	A	G	A
	A	A	A	A	A	A	A	A	A	A	A	G	A	A	G	A	G	A	A	A	G	A	A	G	G	A	A	A	G	A	G	A	A	A	A	A	G	A	A	A	A	G	A	G	G	A	A	G	A
PZE-101077709	A	A	G	A	G	A	G	A	G	A	G	G	G	G	G	G	G	A	G	A	G	G	A	G	G	A	G	G	G	G	G	G	A	G	G	G	G	A	A	A	A	G	G	G	G	A	A	G	G
	A	A	G	A	G	A	G	A	G	A	G	G	G	G	G	G	G	A	G	A	G	G	A	G	G	A	G	G	G	G	G	G	A	G	G	G	G	A	A	A	A	G	G	G	G	A	A	G	G
PZE-101077713	A	A	G	A	G	A	G	A	G	A	G	G	G	G	G	G	G	A	G	A	G	G	A	G	G	G	G	G	G	G	G	G	A	G	G	G	G	A	G	A	G	G	G	G	G	A	A	G	G
	A	A	G	A	G	A	G	A	G	A	G	G	G	G	G	G	G	A	G	A	G	G	A	G	G	G	G	G	G	G	G	G	A	G	G	G	G	A	G	A	G	G	G	G	G	A	A	G	G
PZE-101077773	C	C	T	C	C	T	C	C	C	C	T	C	C	C	C	C	C	C	C	C	T	C	C	C	T	C	0	C	C	C	T	T	C	C	C	C	T	C	C	T	C	C	C	C	C	C	C	C	T
	C	C	T	C	C	T	C	C	C	C	C	C	C	C	C	C	C	C	C	C	T	C	C	C	T	C	0	C	C	C	T	C	C	C	C	C	T	C	C	T	C	C	C	C	C	C	C	C	C
PZE-101077867	C	C	T	C	T	T	T	C	C	C	C	C	C	C	C	T	C	T	C	T	C	C	0	T	C	C	T	T	C	C	T	0	T	0	T	C	T	0	C	T	C	T	C	T	T	C	C	T	T
	C	C	T	C	T	T	T	C	C	C	C	C	C	C	C	T	C	T	C	T	C	C	0	T	C	C	T	T	C	C	T	0	T	0	T	C	T	0	C	T	C	T	C	T	T	C	C	T	T
PZE-101077866	T	T	T	T	T	T	T	T	C	T	T	0	C	T	0	T	0	T	C	T	T	C	0	T	T	T	T	T	T	C	T	0	T	0	T	T	T	0	T	T	T	T	C	T	T	T	T	T	T
	T	T	T	T	T	T	T	T	C	T	T	0	C	T	0	T	0	T	C	T	T	C	0	T	T	T	T	T	T	C	T	0	T	0	T	T	T	0	T	T	T	T	C	T	T	T	T	T	T
PZE-101077878	A	A	G	A	G	A	G	A	G	A	G	G	G	A	G	G	G	G	G	A	G	G	G	G	G	G	G	G	G	G	A	G	A	G	G	G	G	G	G	G	A	A	G	A	G	A	G	G	0
	A	A	G	A	G	A	G	A	G	A	G	G	G	A	G	G	G	G	G	A	G	G	G	G	G	G	G	G	G	G	A	G	A	G	G	G	G	G	G	G	A	A	G	A	G	A	G	G	0
PZE-101077919	A	A	A	A	A	A	A	A	A	A	0	A	A	A	A	A	A	G	A	A	A	G	G	A	A	G	A	A	A	A	G	A	A	A	A	A	A	G	A	A	A	A	A	G	A	A	G	A	A
	A	A	A	A	A	A	A	A	A	A	0	A	A	A	A	A	A	G	A	A	A	G	G	A	A	G	A	A	A	A	G	A	A	A	A	A	A	G	A	A	A	A	A	G	A	A	G	A	A
PZE-101077918	C	C	C	C	C	C	C	C	C	C	0	C	C	C	C	C	C	T	C	C	C	T	T	T	C	T	C	C	C	C	T	C	C	C	C	C	C	T	C	C	C	C	C	T	C	C	T	C	C
	C	C	C	C	C	C	C	C	C	C	0	C	C	C	C	C	C	T	C	C	C	T	T	T	C	T	C	C	C	C	T	C	C	C	C	C	C	T	C	C	C	C	C	T	C	C	T	C	C
PZE-101078026	C	C	T	C	T	C	C	C	C	C	0	C	C	C	C	C	C	C	C	C	T	C	T	T	T	C	C	C	T	T	C	0	C	T	T	T	C	T	C	T	C	C	C	C	T	C	0	C	C
	C	C	T	C	T	C	C	C	C	C	0	C	C	C	C	C	C	C	C	C	T	C	T	T	T	C	C	C	T	T	C	0	C	T	T	T	C	T	C	T	C	C	C	C	T	C	0	C	C
PZE-101078074	A	A	G	A	G	A	A	A	A	A	A	0	A	A	0	A	0	A	A	A	A	0	G	G	G	A	A	A	G	G	A	A	A	G	G	G	A	G	A	G	A	A	A	A	G	A	A	A	A
	A	A	G	A	G	A	A	A	A	A	A	0	A	A	0	A	0	A	A	A	A	0	G	G	G	A	A	A	G	G	A	A	A	G	G	G	A	G	A	G	A	A	A	A	G	A	A	A	A
PZE-101078239	C	C	A	C	A	C	C	C	C	C	A	C	A	C	C	C	C	C	A	A	C	C	C	C	A	A	C	A	A	A	C	A	C	A	C	C	C	C	C	C	C	C	A	A	C	C	C	C	A
	C	C	A	C	A	C	C	C	C	C	A	C	A	C	C	C	C	C	A	A	C	C	C	C	A	A	C	A	A	A	C	A	C	A	C	C	C	C	C	C	C	C	A	A	C	C	C	C	A
PZE-101078409	G	G	A	G	G	G	0	G	G	A	0	G	G	G	A	A	G	G	A	G	G	G	G	0	A	A	A	G	A	G	A	A	G	G	A	G	A	G	G	0	G	G	G	A	0	G	G	A	G
	G	G	A	G	G	G	0	G	G	A	0	G	G	G	A	A	G	G	A	G	G	G	G	0	A	A	A	G	A	G	A	A	G	G	A	G	A	G	G	0	G	G	G	A	0	G	G	A	G
PZE-101078631	G	G	G	G	G	G	G	G	G	A	G	G	G	G	G	G	G	G	G	A	A	G	G	G	A	G	G	G	A	G	G	G	G	G	G	G	G	G	G	G	G	G	G	G	G	G	G	G	G
	G	G	G	G	G	G	G	G	G	A	G	G	G	G	G	G	G	G	G	A	A	G	G	G	A	G	G	G	A	G	G	G	G	G	G	G	G	G	G	G	G	G	G	G	G	G	G	G	G
PZE-101078656	A	A	G	A	A	G	G	A	G	G	G	A	A	A	A	G	A	G	G	A	G	G	G	A	G	A	G	G	G	G	A	G	G	G	A	A	G	G	G	A	A	G	G	G	G	G	G	A	A
	A	A	G	A	A	G	G	A	G	G	G	A	A	A	A	G	A	G	G	A	G	G	G	A	G	A	G	G	G	G	A	G	G	G	A	A	G	G	G	A	A	G	G	G	G	G	G	A	A
PZE-101078676	A	A	A	A	A	A	A	A	A	C	A	A	A	A	A	A	A	A	A	A	A	A	A	A	C	A	A	A	C	A	A	C	C	A	A	A	A	A	A	A	A	C	A	A	C	C	A	A	A
	A	A	A	A	A	A	A	A	A	C	A	A	A	A	A	A	A	A	A	A	A	A	A	A	C	A	A	A	C	A	A	C	C	A	A	A	A	A	A	A	A	C	A	A	C	C	A	A	A
PZE-101078683	A	A	A	A	A	A	A	A	A	G	A	A	A	A	A	A	A	A	A	A	A	A	A	A	G	A	A	A	G	A	A	0	G	A	A	A	A	A	A	A	A	A	A	A	A	0	A	A	A
	A	A	A	A	A	A	A	A	A	G	A	A	A	A	A	A	A	A	A	A	A	A	A	A	G	A	A	A	G	A	A	0	G	A	A	A	A	A	A	A	A	A	A	A	A	0	A	A	A
PZE-101078713	G	G	G	G	G	G	G	G	G	A	G	G	G	G	G	G	G	G	G	G	G	G	G	G	A	G	A	G	A	G	G	G	A	G	G	G	G	G	G	G	G	G	G	G	G	G	G	G	G
	G	G	G	G	G	G	G	G	G	A	G	G	G	G	G	G	G	G	G	G	G	G	G	G	A	G	A	G	A	G	G	G	A	G	G	G	G	G	G	G	G	G	G	G	G	G	G	G	G
PZE-101078745	C	C	T	C	C	C	C	C	C	C	C	C	T	C	C	T	C	C	T	C	T	C	C	C	T	C	T	C	T	T	C	T	C	T	C	C	T	C	C	C	T	C	C	T	T	C	C	T	0
	C	C	T	C	C	C	C	C	C	C	C	C	T	C	C	T	C	C	T	C	T	C	C	C	T	C	T	C	T	T	C	T	C	T	C	C	T	C	C	C	T	C	C	T	T	C	C	T	0
PZE-101078752	A	A	G	A	A	A	A	A	A	A	A	A	A	A	A	G	A	A	G	A	A	A	A	A	G	A	G	A	G	A	A	G	A	G	A	A	G	A	A	A	A	G	A	G	A	A	A	A	A
	A	A	G	A	A	A	A	A	A	A	A	A	A	A	A	G	A	A	G	A	A	A	A	A	G	A	G	A	G	A	A	G	A	G	A	A	G	A	A	A	A	G	A	G	A	A	A	A	A
PZE-101078888	T	T	G	T	T	G	G	T	0	T	G	T	G	T	T	G	T	T	G	G	G	G	T	G	T	T	T	G	T	G	T	G	G	G	T	G	G	T	T	G	G	G	G	G	T	T	G	G	0
	T	T	G	T	T	G	G	T	0	T	G	T	G	T	T	G	T	T	G	G	G	G	T	G	T	T	T	G	T	G	T	G	G	G	T	G	G	T	T	G	G	G	G	G	T	T	G	G	0
PZE-101078905	A	A	G	A	A	G	G	A	G	A	G	A	G	A	A	G	A	G	G	G	G	G	A	G	A	A	A	G	A	0	A	G	G	G	A	G	G	A	G	0	G	0	G	G	G	A	0	G	A
	A	A	G	A	A	G	G	A	G	A	G	A	G	A	A	G	A	G	G	G	G	G	A	G	A	A	A	G	A	0	A	G	G	G	A	G	G	A	G	0	G	0	G	G	G	A	0	G	A
PZE-101078906	C	C	C	C	C	C	C	C	C	C	C	C	T	C	C	C	C	C	C	C	C	C	C	C	C	C	C	C	C	0	C	C	C	C	C	C	C	C	C	0	C	0	C	C	C	C	0	T	C
	C	C	C	C	C	C	C	C	C	C	C	C	T	C	C	C	C	C	C	C	C	C	C	C	C	C	C	C	C	0	C	C	C	C	C	C	C	C	C	0	C	0	C	C	C	C	0	T	C
PZE-101078907	G	G	G	G	G	G	G	G	G	G	G	G	G	G	G	G	G	A	G	G	G	G	G	G	G	G	G	G	G	A	G	G	G	A	G	G	G	G	A	A	G	A	G	G	G	G	A	G	G
	G	G	G	G	G	G	G	G	G	G	G	G	G	G	G	G	G	A	G	G	G	G	G	G	G	G	G	G	G	A	G	G	G	A	G	G	G	G	A	A	G	A	G	G	G	G	A	G	G
PZE-101078991	A	A	G	A	G	G	G	A	G	G	G	A	G	G	A	G	A	G	G	A	A	G	A	G	A	A	G	G	A	G	A	G	A	A	G	G	G	A	G	G	G	G	G	G	G	A	G	G	G
	A	A	G	A	G	G	G	A	G	G	G	A	G	G	A	G	A	G	G	A	A	G	A	G	A	A	G	G	A	G	A	G	A	A	G	G	G	A	G	G	G	G	G	G	G	A	G	G	G
PZE-101078992	C	C	T	C	T	T	T	C	T	T	T	C	T	T	C	T	C	T	T	C	C	T	C	T	C	C	T	T	C	T	C	T	C	C	T	T	T	C	T	T	T	T	T	T	T	C	T	T	T
	C	C	T	C	T	T	T	C	T	T	T	C	T	T	C	T	C	T	T	C	C	T	C	T	C	C	T	T	C	T	C	T	C	C	T	T	T	C	T	T	T	T	T	T	T	C	T	T	T
PZE-101079070	G	G	T	G	T	T	T	G	T	T	T	G	G	G	0	T	0	T	T	T	G	T	T	T	T	G	G	T	T	T	T	T	T	G	T	T	T	T	T	T	G	T	T	T	G	G	G	G	G
	G	G	T	G	T	T	T	G	T	T	G	G	G	G	0	T	0	T	T	T	G	T	T	T	T	G	G	T	T	T	T	T	T	G	T	T	T	T	T	T	G	T	T	T	G	G	G	G	G
PZE-101079122	A	A	A	A	A	A	A	A	A	A	A	A	A	A	A	A	A	A	A	A	A	A	A	A	A	A	G	A	A	A	A	G	A	A	A	A	A	A	A	A	G	A	A	A	A	A	A	A	A
	A	A	A	A	A	A	A	A	A	A	A	A	A	A	A	A	A	A	A	A	A	A	A	A	A	A	G	A	A	A	A	G	A	A	A	A	A	A	A	A	G	A	A	A	A	A	A	A	A
PZE-101079160	T	T	C	T	C	C	T	T	T	C	T	0	C	T	C	C	C	C	C	C	T	T	T	C	T	C	T	T	T	C	T	C	C	T	C	T	C	T	C	C	C	C	T	C	T	T	C	C	T
	T	T	C	T	C	C	T	T	T	C	T	0	C	T	C	C	C	C	C	C	T	T	T	C	T	C	T	T	T	C	T	C	C	T	C	T	C	T	C	C	C	C	T	C	T	T	C	C	T
PZE-101079205	T	T	T	T	T	T	T	T	T	T	T	T	G	T	T	T	T	G	T	T	G	T	T	T	T	G	G	T	T	G	T	T	T	G	G	T	T	T	G	G	G	G	T	T	T	T	T	G	T
	T	T	T	T	T	T	T	T	T	T	T	T	G	T	T	T	T	G	T	T	G	T	T	T	T	G	G	T	T	G	T	T	T	G	G	T	T	T	G	G	G	G	T	T	T	T	T	G	T
PZE-101079397	C	C	T	C	T	T	T	C	T	C	T	C	C	C	C	T	C	T	T	C	C	T	T	T	C	T	C	T	C	T	T	T	T	T	T	C	T	T	T	T	T	T	T	T	T	C	T	C	0
	C	C	T	C	T	T	T	C	T	C	T	C	C	C	C	T	C	T	T	C	C	T	T	T	C	T	C	T	C	T	T	T	T	T	T	C	T	T	T	T	T	T	T	T	T	C	T	C	0
PZE-101079826	A	G	A	A	A	A	A	A	G	A	A	G	A	A	G	A	A	A	A	A	G	A	A	A	A	A	A	A	A	A	A	A	A	G	A	A	A	A	A	A	A	A	A	A	A	A	G	A	A
	A	G	A	A	A	A	A	A	G	A	A	G	A	A	G	A	A	A	A	A	G	A	A	A	A	A	A	A	A	A	A	A	A	G	A	A	A	A	A	A	A	A	A	A	A	A	G	A	A
PZE-101079825	T	C	T	T	C	T	T	T	C	T	C	C	T	T	C	T	T	T	T	T	C	C	T	T	T	T	C	T	T	T	T	T	C	C	T	T	T	T	T	T	C	C	T	T	T	T	C	C	C
	T	C	T	T	C	C	T	T	C	T	C	C	T	T	C	T	T	T	T	T	C	C	T	T	T	T	C	T	T	T	T	T	C	C	T	T	T	T	T	T	C	C	T	T	T	T	C	C	C
PZE-101079806	G	G	G	G	A	A	A	G	A	G	0	0	G	G	A	G	A	G	G	G	A	A	G	G	A	A	G	G	A	G	G	G	G	A	G	G	G	G	A	G	A	G	G	G	G	G	A	G	A
	G	G	G	G	A	G	A	G	A	G	0	0	G	G	A	G	A	G	G	G	A	A	G	G	A	A	G	G	A	G	G	G	G	A	G	G	G	G	A	G	A	G	G	G	G	G	A	G	A
PZE-101079805	A	0	0	0	G	A	G	0	G	A	0	G	A	A	G	G	G	G	A	A	G	G	A	A	G	G	G	A	G	A	A	A	0	G	G	A	G	A	G	G	G	G	A	A	A	A	A	A	G
	A	0	0	0	G	G	G	0	G	A	0	G	A	A	G	G	G	G	A	A	G	G	A	A	G	G	G	A	G	A	A	A	0	G	G	A	G	A	G	G	G	G	A	A	A	A	A	A	G
PZE-101079797	G	G	G	G	A	G	A	G	A	G	G	A	G	G	A	G	A	G	G	G	A	A	G	G	A	A	G	G	A	G	G	G	G	A	G	G	G	G	A	G	G	G	G	G	G	G	G	G	G
	G	G	G	G	A	G	A	G	A	G	G	A	G	G	A	G	A	G	G	G	A	A	G	G	A	A	G	G	A	G	G	G	G	A	G	G	G	G	A	G	G	G	G	G	G	G	G	G	G
PZE-101079834	G	G	G	G	G	A	G	G	G	G	G	G	G	G	G	G	G	G	G	G	G	G	G	G	G	G	G	G	G	G	G	G	A	G	G	G	G	G	G	G	G	A	G	G	G	G	G	G	G
	G	G	G	G	G	G	G	G	G	G	G	G	G	G	G	G	G	G	G	G	G	G	G	G	G	G	G	G	G	G	G	G	A	G	G	G	G	G	G	G	G	A	G	G	G	G	G	G	G
PZE-101079844	G	G	G	G	G	A	G	G	A	G	A	A	A	G	A	G	G	G	G	G	G	A	A	A	A	A	G	G	A	G	G	G	G	A	G	G	G	A	A	G	G	G	G	G	A	G	G	G	G
	G	G	G	G	G	G	G	G	A	G	A	A	A	G	A	G	G	G	G	G	G	A	A	A	A	A	G	G	A	G	G	G	G	A	G	G	G	A	A	G	G	G	G	G	A	G	G	G	G
PZE-101079876	A	A	A	A	A	A	A	A	A	A	G	A	G	A	A	A	A	0	A	A	A	A	A	A	A	A	A	A	A	A	A	A	A	A	A	A	A	A	A	A	A	A	A	A	A	A	A	A	A
	A	A	A	A	A	A	A	A	A	A	G	A	G	A	A	A	A	0	A	A	A	A	A	A	A	A	A	A	A	A	A	A	A	A	A	A	A	A	A	A	A	A	A	A	A	A	A	A	A
PZE-101079899	C	C	C	C	C	C	C	C	C	C	0	C	C	C	C	C	C	C	C	C	A	A	C	C	C	A	C	C	C	A	C	C	C	C	C	A	C	C	C	C	0	C	0	C	0	C	C	A	A
	C	C	C	C	C	C	C	C	C	C	0	C	C	C	C	C	C	C	C	C	A	A	C	C	C	A	C	C	C	A	C	C	C	C	C	A	C	C	C	C	0	C	0	C	0	C	C	A	A
PZE-101079903	G	T	T	G	T	T	G	G	T	G	0	T	T	G	T	T	G	G	G	G	G	G	G	G	G	G	G	T	G	G	T	T	G	G	G	G	G	G	G	G	G	G	G	T	G	T	G	G	G
	G	T	T	G	T	T	G	G	T	G	0	T	T	G	T	T	G	G	G	G	G	G	G	G	G	G	G	T	G	G	T	T	G	G	G	G	G	G	G	G	G	G	G	T	G	T	G	G	G
PZE-101079935	G	G	G	G	G	G	G	G	G	G	G	G	G	G	G	G	G	G	G	G	A	A	G	G	G	A	G	G	G	A	G	G	G	G	G	A	G	G	G	G	G	G	0	G	0	G	G	A	A
	G	G	G	G	G	G	G	G	G	G	G	G	G	G	G	G	G	G	G	G	A	A	G	G	G	A	G	G	G	A	G	G	G	G	G	A	G	G	G	G	G	G	0	G	0	G	G	A	A
PZE-101080179	C	C	C	C	C	C	C	C	C	C	C	C	C	C	C	C	T	C	C	C	C	C	C	C	C	T	C	C	C	C	T	C	T	T	C	C	C	C	C	C	C	C	C	C	C	C	C	C	C
	C	C	C	C	C	C	C	C	C	C	C	C	C	C	C	C	T	C	C	C	C	C	C	C	C	T	C	C	C	C	T	C	T	T	C	C	C	C	C	C	C	C	C	C	C	C	C	C	C
PZE-101080201	T	T	T	T	T	T	T	T	T	T	T	T	G	T	T	G	T	G	T	G	T	T	0	G	G	T	G	T	G	T	T	T	T	T	T	T	T	G	G	T	T	G	T	T	T	G	T	G	G
	T	T	T	T	T	G	T	T	T	T	T	T	G	T	T	G	T	G	T	G	T	T	0	G	G	T	G	T	G	T	T	T	T	T	T	T	T	G	G	T	T	G	T	T	T	G	T	G	G
PZE-101080257	G	A	G	G	A	G	G	G	A	G	G	G	0	G	G	G	G	A	A	A	A	G	G	G	A	G	G	G	G	A	G	G	A	A	G	G	A	G	A	G	G	G	G	G	A	G	A	A	G
	G	A	G	G	A	G	G	G	A	G	G	G	0	G	G	G	G	A	A	A	A	G	G	G	A	G	G	G	G	A	G	G	A	A	G	G	A	G	A	G	G	G	G	G	A	G	A	A	G
PZE-101080259	A	G	A	A	G	A	A	A	G	A	A	A	G	A	G	G	A	G	G	G	G	A	A	A	G	A	A	A	A	G	A	A	G	A	A	A	G	A	G	A	A	A	A	A	G	A	G	G	A
	A	G	A	A	G	G	A	A	G	A	A	A	G	A	G	G	A	G	G	G	G	A	A	A	G	A	A	A	A	G	A	A	G	A	A	A	G	A	G	A	A	A	A	A	G	A	G	G	A
PZE-101080272	A	G	G	A	G	G	A	A	G	A	0	G	G	A	G	G	A	G	G	G	G	G	G	G	A	A	G	G	A	G	A	G	A	G	G	A	G	G	G	G	G	G	G	G	G	G	A	A	G
	A	G	G	A	G	G	A	A	G	A	0	G	G	A	G	G	A	G	G	G	G	G	G	G	A	A	G	G	A	G	A	G	A	G	G	A	G	G	G	G	G	G	G	G	G	G	A	A	G
PZE-101080306	0	A	C	0	A	A	0	0	A	0	A	A	A	A	A	A	C	C	A	C	A	A	C	C	A	C	A	A	A	A	A	C	A	A	A	A	A	C	A	A	C	C	A	C	A	A	C	A	C
	0	A	C	0	A	A	0	0	A	0	A	A	A	A	A	A	C	C	A	C	A	A	C	C	A	C	A	A	A	A	A	C	A	A	A	A	A	C	A	A	C	C	A	C	A	A	C	A	C
PZE-101080314	C	C	C	C	C	C	C	C	C	C	0	C	C	C	C	C	T	C	C	C	T	C	T	T	C	T	C	C	C	C	C	T	C	C	C	T	C	T	C	C	T	T	C	T	C	C	T	T	T
	C	C	C	C	C	C	C	C	C	C	0	C	C	C	C	C	T	C	C	C	T	C	T	T	C	T	C	C	C	C	C	T	C	C	C	T	C	T	C	C	T	T	C	T	C	C	T	T	T
PZE-101080319	G	A	A	G	A	A	G	G	A	G	A	A	A	A	A	A	A	G	A	G	A	A	A	A	A	A	G	A	G	A	G	A	A	A	A	A	A	A	G	G	A	A	A	A	G	A	A	A	A
	G	A	A	G	A	G	G	G	A	G	A	A	A	A	A	A	A	G	A	G	A	A	A	A	A	A	G	A	G	A	G	A	A	A	A	A	A	A	G	G	A	A	A	A	G	A	A	A	A
PZE-101080322	G	G	G	G	A	G	G	G	A	G	0	A	G	G	G	G	G	G	G	G	G	A	G	A	G	G	G	G	G	G	G	G	G	A	G	G	A	G	G	G	A	G	G	G	G	A	A	G	0
	G	G	G	G	A	G	G	G	A	G	0	A	G	G	G	G	G	G	G	G	G	A	G	A	G	G	G	G	G	G	G	G	G	A	G	G	A	G	G	G	A	G	G	G	G	A	A	G	0
PZE-101080333	G	G	G	G	A	G	G	G	A	G	A	A	G	G	G	G	G	G	G	G	A	A	G	A	G	A	G	G	G	G	G	G	A	A	G	A	A	G	A	A	A	G	G	A	G	A	A	A	A
	G	G	G	G	A	G	G	G	A	G	A	A	G	G	G	G	G	G	G	G	A	A	G	A	G	A	G	G	G	G	G	G	A	A	G	A	A	G	A	A	A	G	G	A	G	A	A	A	A
PZE-101080334	T	C	C	T	T	T	T	T	T	T	T	T	C	T	C	C	T	T	C	T	T	T	T	T	C	T	T	C	T	C	T	T	T	T	C	T	T	T	T	T	T	T	C	T	C	T	T	T	T
	T	C	C	T	T	C	T	T	T	T	T	T	C	T	C	C	T	T	C	T	T	T	T	T	C	T	T	C	T	C	T	T	T	T	C	T	T	T	T	T	T	T	C	T	C	T	T	T	T
PZE-101080365	T	C	C	T	T	T	T	T	T	T	0	T	C	T	C	C	T	T	C	T	T	T	T	T	C	T	T	C	T	C	T	T	T	T	C	T	T	T	T	T	T	T	C	T	C	T	T	T	T
	T	C	C	T	T	C	T	T	T	T	0	T	C	T	C	C	T	T	C	T	T	T	T	T	C	T	T	C	T	C	T	T	T	T	C	T	T	T	T	T	T	T	C	T	C	T	T	T	T
PZE-101080366	C	C	C	C	C	C	C	C	C	C	C	C	C	C	C	C	C	C	C	C	C	C	C	C	C	T	C	C	C	C	C	C	C	C	C	T	C	C	T	C	C	C	C	C	C	C	C	C	C
	C	C	C	C	C	C	C	C	C	C	C	C	C	C	C	C	C	C	C	C	C	C	C	C	C	T	C	C	C	C	C	C	C	C	C	T	C	C	T	C	C	C	C	C	C	C	C	C	C
PZE-101080369	G	G	G	G	G	G	G	G	G	G	G	G	G	G	G	G	G	G	G	G	G	G	G	G	G	A	G	G	G	G	G	G	G	0	G	A	G	G	A	G	G	G	G	G	G	G	G	G	G
	G	G	G	G	G	G	G	G	G	G	G	G	G	G	G	G	G	G	G	G	G	G	G	G	G	A	G	G	G	G	G	G	G	0	G	A	G	G	A	G	G	G	G	G	G	G	G	G	G
PZE-101080376	G	G	G	G	G	G	G	G	A	G	0	A	G	G	G	G	G	G	G	G	G	A	G	G	G	G	G	G	G	G	G	G	G	A	G	G	A	G	G	A	G	G	G	G	G	A	G	A	G
	G	G	G	G	G	G	G	G	A	G	0	A	G	G	G	G	G	G	G	G	G	A	G	G	G	G	G	G	G	G	G	G	G	A	G	G	A	G	G	A	G	G	G	G	G	A	G	A	G
PZE-101080377	C	C	C	C	C	C	C	C	T	C	C	T	C	C	C	C	C	C	C	C	C	T	C	C	C	C	C	C	C	C	C	C	C	T	C	C	T	C	C	T	C	C	C	C	C	T	C	T	C
	C	C	C	C	C	C	C	C	T	C	C	T	C	C	C	C	C	C	C	C	C	T	C	C	C	C	C	C	C	C	C	C	C	T	C	C	T	C	C	T	C	C	C	C	C	T	C	T	C
PZE-101080378	G	G	G	G	G	G	G	G	A	G	0	A	G	G	G	G	G	G	G	G	A	A	G	A	0	A	G	G	G	G	G	A	G	A	G	A	A	G	A	A	A	G	G	A	G	A	A	A	A
	G	G	G	G	G	G	G	G	A	G	0	A	G	G	G	G	G	G	G	G	A	A	G	A	0	A	G	G	G	G	G	A	G	A	G	A	A	G	A	A	A	G	G	A	G	A	A	A	A
PZE-101080379	T	G	G	T	G	T	T	T	G	T	G	G	G	T	G	G	T	T	G	T	G	G	T	G	G	G	T	G	T	G	T	G	T	G	G	G	G	T	G	G	G	T	G	G	G	G	G	G	0
	T	G	G	T	G	G	T	T	G	T	G	G	G	T	G	G	T	T	G	T	G	G	T	G	G	G	T	G	T	G	T	G	T	G	G	G	G	T	G	G	G	T	G	G	G	G	G	G	0
PZE-101080389	C	T	T	C	T	T	C	C	T	C	C	T	T	C	T	T	C	T	T	T	T	T	C	T	T	T	C	T	C	T	C	T	C	T	T	T	T	C	T	T	T	C	T	T	T	T	T	T	0
	C	T	T	C	T	C	C	C	T	C	C	T	T	C	T	T	C	T	T	T	T	T	C	T	T	T	C	T	C	T	C	T	C	T	T	T	T	C	T	T	T	C	T	T	T	T	T	T	0
PZE-101080390	A	C	C	A	C	A	A	A	C	A	A	C	C	A	C	C	A	A	C	A	C	C	A	C	C	C	A	C	A	C	A	C	A	C	C	C	C	A	C	C	C	A	C	C	C	C	C	C	0
	A	C	C	A	C	C	A	A	C	A	A	C	C	A	C	C	A	A	C	A	C	C	A	C	C	C	A	C	A	C	A	C	A	C	C	C	C	A	C	C	C	A	C	C	C	C	C	C	0
PZE-101080419	C	C	C	C	C	C	C	C	C	C	C	C	C	C	C	C	C	C	C	C	C	C	C	T	C	C	C	C	C	C	C	C	C	C	C	C	C	C	C	C	T	C	C	C	C	C	T	C	T
	C	C	C	C	C	C	C	C	C	C	C	C	C	C	C	C	C	C	C	C	C	C	C	T	C	C	C	C	C	C	C	C	C	C	C	C	C	C	C	C	T	C	C	C	C	C	T	C	T
PZE-101080420	G	A	A	G	A	A	G	G	A	G	0	A	A	G	A	A	G	G	A	G	A	A	G	G	0	G	G	A	G	A	0	0	G	A	A	G	A	G	G	A	G	G	A	A	0	A	G	A	G
	G	A	A	G	A	G	G	G	A	G	0	A	A	G	A	A	G	G	A	G	A	A	G	G	0	G	G	A	G	A	0	0	G	A	A	G	A	G	G	A	G	G	A	A	0	A	G	A	G
PZE-101080433	G	G	G	G	G	G	G	G	G	G	G	G	G	G	G	G	G	G	G	G	A	G	G	0	0	G	G	G	G	G	G	G	G	G	G	G	G	G	A	G	0	G	G	G	0	G	0	G	G
	G	G	G	G	G	G	G	G	G	G	G	G	G	G	G	G	G	G	G	G	A	G	G	0	0	G	G	G	G	G	G	G	G	G	G	G	G	G	A	G	0	G	G	G	0	G	0	G	G
PZE-101080466	G	G	A	G	A	G	G	G	G	G	G	G	A	G	A	G	G	A	G	A	G	G	G	G	G	G	G	A	G	G	G	G	G	G	G	G	G	G	G	G	G	G	A	G	G	G	G	G	G
	G	G	A	G	A	G	G	G	G	G	G	G	A	G	A	G	G	A	G	A	G	G	G	G	G	G	G	A	G	G	G	G	G	G	G	G	G	G	G	G	G	G	A	G	G	G	G	G	G
PZE-101080470	A	A	C	A	C	A	A	A	A	A	A	A	C	A	C	A	A	C	A	C	A	A	A	A	A	A	A	C	A	A	A	A	A	A	A	A	A	A	A	A	A	A	C	A	A	A	A	A	A
	A	A	C	A	C	A	A	A	A	A	A	A	C	A	C	A	A	C	A	C	A	A	A	A	A	A	A	C	A	A	A	A	A	A	A	A	A	A	A	A	A	A	C	A	A	A	A	A	A
PZE-101080504	G	0	G	G	G	G	G	G	0	G	G	A	G	G	G	A	G	G	G	G	A	G	G	G	G	G	G	G	G	A	G	G	G	G	A	G	A	G	G	G	G	G	0	A	A	0	G	G	G
	G	0	G	G	G	G	G	G	0	G	G	G	G	G	G	A	G	G	G	G	A	G	G	G	G	G	G	G	G	A	G	G	G	G	G	G	G	G	G	G	G	G	0	A	A	0	G	G	G
PZE-101080509	T	C	C	T	C	T	T	T	C	T	0	C	C	T	C	C	T	C	C	C	C	T	T	C	C	C	T	C	T	C	C	C	T	C	C	C	C	T	C	T	C	C	C	C	C	C	C	T	C
	T	C	C	T	C	C	T	T	C	T	0	C	C	T	C	C	T	C	C	C	C	T	T	C	C	C	T	C	T	C	C	C	T	C	C	C	C	T	C	T	C	C	C	C	C	C	C	T	C
PZE-101080514	T	T	T	T	T	T	T	T	T	T	C	T	T	T	T	T	T	T	T	T	T	T	T	T	T	T	T	T	T	T	C	C	T	T	T	C	T	T	T	T	T	C	T	T	T	T	T	T	T
	T	T	T	T	T	C	T	T	T	T	C	T	T	T	T	T	T	T	T	T	T	T	T	T	T	T	T	T	T	T	C	C	T	T	T	C	T	T	T	T	T	C	T	T	T	T	T	T	T
PZE-101080531	A	A	G	A	G	A	A	A	0	A	A	A	G	A	G	A	A	G	A	G	A	A	A	A	G	A	0	G	A	A	A	A	A	A	A	A	A	A	A	A	A	A	A	A	A	A	A	A	A
	A	A	G	A	G	A	A	A	0	A	A	A	G	A	G	A	A	G	A	G	A	A	A	A	G	A	0	G	A	A	A	A	A	A	A	A	A	A	A	A	A	A	A	A	A	A	A	A	A
PZE-101080600	G	G	A	G	A	G	G	G	G	G	G	A	A	0	A	A	0	0	A	0	G	G	A	A	0	G	A	A	G	A	G	0	A	A	G	A	A	A	A	G	A	G	A	A	G	A	A	A	A
	G	G	A	G	A	G	G	G	G	G	G	A	A	0	A	A	0	0	A	0	G	G	A	A	0	G	A	A	G	A	G	0	A	A	G	A	A	A	A	G	A	G	A	A	G	A	A	A	A
PZE-101080614	A	A	C	A	C	A	A	A	A	A	A	C	C	A	C	C	A	A	C	A	A	A	A	A	A	A	C	C	A	C	A	A	A	A	A	C	C	A	A	A	A	A	C	C	C	C	A	A	A
	A	A	C	A	C	A	A	A	A	A	A	C	C	A	C	C	A	A	C	A	A	A	A	A	A	A	C	C	A	C	A	A	A	A	A	C	C	A	A	A	A	A	C	C	C	C	A	A	A
PZE-101080617	A	A	A	A	A	A	A	A	A	A	A	A	A	A	A	A	G	A	A	A	A	A	A	A	A	A	A	A	A	A	A	G	A	A	A	A	A	A	A	A	A	A	A	A	A	A	A	A	A
	A	A	A	A	A	A	A	A	A	A	A	A	A	A	A	A	G	A	A	A	A	A	A	A	A	A	A	A	A	A	A	G	A	A	A	A	A	A	A	A	A	A	A	A	A	A	A	A	A
PZE-101080622	C	C	T	C	T	C	C	C	C	C	C	T	T	C	T	T	C	C	T	C	C	C	C	C	C	C	T	T	C	T	C	C	C	C	C	T	T	C	C	C	C	C	T	T	T	T	C	C	C
	C	C	T	C	T	C	C	C	C	C	C	T	T	C	T	T	C	C	T	C	C	C	C	C	C	C	T	T	C	T	C	C	C	C	C	T	T	C	C	C	C	C	T	T	T	T	C	C	C
PZE-101080594	G	A	G	G	A	A	G	G	A	G	G	G	G	A	A	G	G	A	G	A	A	G	A	G	A	A	G	A	G	G	G	G	G	A	A	A	G	A	A	G	G	G	G	G	G	G	G	A	G
	G	A	G	G	A	A	G	G	A	G	G	G	G	A	A	G	G	A	G	A	A	G	A	G	A	A	G	A	G	G	G	G	G	A	A	A	G	A	A	G	G	G	G	G	G	G	G	A	G
PZE-101080672	C	C	C	C	A	A	C	C	C	C	A	C	C	A	C	A	A	A	C	A	C	A	A	A	A	A	C	A	A	A	C	C	A	A	A	C	C	A	A	C	A	A	C	A	A	A	C	A	A
	C	C	C	C	A	C	C	C	C	C	A	C	C	A	C	A	A	A	C	A	C	A	A	A	A	A	C	A	A	A	C	C	A	A	A	C	C	A	A	C	A	A	C	A	A	A	C	A	A
PZE-101080708	C	C	C	C	C	C	C	C	C	C	0	C	C	C	C	C	T	C	C	C	C	T	T	C	C	C	T	C	C	C	T	C	T	C	C	C	C	T	T	C	T	T	C	C	C	C	T	T	T
	C	C	C	C	C	C	C	C	C	C	0	C	C	C	C	C	T	C	C	C	C	C	T	C	C	C	T	C	C	C	C	C	T	C	C	C	C	T	C	C	C	C	C	C	C	C	C	C	C
PZE-101080712	G	G	A	G	G	G	G	G	G	G	G	A	A	G	G	A	G	G	G	G	G	G	G	G	G	G	G	G	G	A	G	G	G	G	G	G	G	G	G	G	G	G	A	A	G	A	G	G	G
	G	G	A	G	G	G	G	G	G	G	G	A	A	G	G	A	G	G	G	G	G	G	G	G	G	G	G	G	G	A	G	G	G	G	G	G	G	G	G	G	G	G	A	A	G	A	G	G	G
PZE-101080722	A	A	G	A	A	A	A	A	A	A	A	G	G	A	A	G	A	A	A	A	A	A	A	A	A	A	A	A	A	G	A	A	A	A	A	A	A	A	A	A	A	A	G	G	A	G	A	A	A
	A	A	G	A	A	A	A	A	A	A	A	G	G	A	A	G	A	A	A	A	A	A	A	A	A	A	A	A	A	G	A	A	A	A	A	A	A	A	A	A	A	A	G	G	A	G	A	A	A
PZE-101080725	T	T	C	T	C	T	T	T	T	T	T	C	C	T	T	C	T	T	T	T	T	T	T	T	T	T	T	C	T	C	T	T	T	T	T	T	T	T	T	T	T	T	C	C	T	C	T	T	T
	T	T	C	T	C	T	T	T	T	T	T	C	C	T	T	C	T	T	T	T	T	T	T	T	T	T	T	C	T	C	T	T	T	T	T	T	T	T	T	T	T	T	C	C	T	C	T	T	T
PZE-101080756	A	A	A	A	A	A	A	A	A	A	A	A	A	A	C	A	A	A	A	A	A	A	A	A	A	A	C	A	A	A	C	0	A	A	A	0	C	A	A	A	A	A	A	A	A	A	A	A	A
	A	A	A	A	A	C	A	A	A	A	A	A	A	A	C	A	A	A	A	A	A	A	A	A	A	A	C	A	A	A	C	0	A	A	A	0	C	A	A	A	A	A	A	A	A	A	A	A	A
PZE-101080824	G	G	G	G	G	A	G	G	G	G	G	G	G	G	A	G	G	G	G	G	G	G	G	G	G	G	A	G	G	G	A	A	G	G	G	A	A	G	G	G	G	G	G	G	G	G	G	G	G
	G	G	G	G	G	G	G	G	G	G	G	G	G	G	A	G	G	G	G	G	G	G	G	G	G	G	A	G	G	G	A	A	G	G	G	A	A	G	G	G	G	G	G	G	G	G	G	G	G
PZE-101119846	T	T	C	T	T	T	T	T	T	T	T	T	T	T	T	T	T	C	T	T	T	T	C	C	C	C	T	T	C	T	C	C	C	C	T	C	T	C	C	C	T	C	T	T	C	T	T	T	T
	T	T	C	T	T	T	T	T	T	T	T	T	T	T	T	T	T	C	T	T	T	T	C	C	C	C	T	T	C	T	C	C	C	C	T	C	T	C	C	C	T	C	T	T	C	T	T	T	T
PZE-101119915	G	A	A	G	A	A	A	A	A	A	A	G	A	A	G	A	G	G	A	A	A	A	A	A	G	A	A	A	G	G	A	A	A	A	A	G	G	G	G	G	A	A	A	A	A	G	A	A	G
	G	A	A	G	A	A	A	A	A	A	A	G	A	A	G	A	G	G	A	A	A	A	A	A	G	A	A	A	G	G	A	A	A	A	A	G	G	G	G	G	A	A	A	A	A	G	A	A	G
PZE-101119964	A	A	A	A	A	A	A	C	A	A	A	A	A	A	A	A	A	A	A	A	A	A	0	A	A	C	0	A	A	A	A	A	A	A	A	A	A	A	A	A	A	A	A	A	C	A	A	A	A
	A	A	A	A	A	A	A	C	A	A	A	A	A	A	A	A	A	A	A	A	A	A	0	A	A	C	0	A	A	A	A	A	A	A	A	A	A	A	A	A	A	A	A	A	C	A	A	A	A
PZE-101119968	A	A	A	A	A	A	A	A	A	A	A	0	A	A	A	A	A	C	C	0	A	A	C	A	C	0	0	A	0	C	0	A	C	C	A	A	C	C	A	A	A	C	A	A	0	A	A	A	A
	A	A	A	A	A	A	A	A	A	A	A	0	A	A	A	A	A	C	C	0	A	A	C	A	C	0	0	A	0	C	0	A	C	C	A	A	C	C	A	A	A	C	A	A	0	A	A	A	A
PZE-101120107	A	A	A	A	A	G	A	A	G	G	0	G	A	A	G	G	G	0	A	G	A	G	A	A	A	A	G	A	A	A	A	G	A	A	G	G	A	A	G	A	G	A	A	G	A	A	G	A	0
	A	A	A	A	A	G	A	A	G	G	0	G	A	A	G	G	G	0	A	G	A	G	A	A	A	A	G	A	A	A	A	G	A	A	G	G	A	A	G	A	G	A	A	G	A	A	G	A	0
PZE-101120118	G	G	G	G	0	G	0	G	G	G	0	G	G	T	G	G	G	G	G	G	G	G	G	G	T	T	G	T	T	G	G	G	G	T	G	G	T	G	T	T	G	T	G	G	T	T	G	G	G
	G	G	G	G	0	G	0	G	G	G	0	G	G	T	G	G	G	G	G	G	G	G	G	G	T	T	G	T	T	G	G	G	G	T	G	G	T	G	T	T	G	T	G	G	T	G	G	G	G
PZE-101120125	T	C	C	T	T	C	T	T	C	C	0	C	C	T	C	C	C	T	T	C	C	C	T	T	T	T	C	T	T	C	T	T	T	T	C	T	T	T	T	T	T	T	C	C	T	T	C	T	T
	T	C	C	T	T	C	T	T	C	C	0	C	C	T	C	C	C	T	T	C	C	C	T	T	T	T	C	T	T	C	T	T	T	T	C	T	T	T	T	T	T	T	C	C	T	T	C	T	T
PZE-101120159	C	C	A	C	C	A	C	C	C	C	C	C	A	C	C	C	C	C	C	C	A	C	C	C	C	C	0	C	C	0	C	C	C	C	C	C	C	C	C	C	C	C	C	C	C	C	C	C	C
	C	C	A	C	C	A	C	C	C	C	C	C	A	C	C	C	C	C	C	C	A	C	C	C	C	C	0	C	C	0	C	C	C	C	C	C	C	C	C	C	C	C	C	C	C	C	C	C	C
PZE-101120184	C	A	A	C	C	A	C	C	A	C	0	A	A	C	A	C	C	C	A	A	A	A	C	C	C	C	A	C	C	A	C	C	C	C	A	C	C	C	C	A	C	C	A	A	A	C	A	C	C
	C	A	A	C	C	A	C	C	A	C	0	A	A	C	A	C	C	C	A	A	A	A	C	C	C	C	A	C	C	A	C	C	C	C	A	C	C	C	C	A	C	C	A	A	A	C	A	C	C
PZE-101120190	A	A	G	A	A	G	A	A	G	A	A	G	G	A	G	A	A	A	0	G	G	G	A	A	A	A	0	A	A	G	0	G	A	A	G	A	A	A	A	G	A	A	0	G	G	A	G	A	A
	A	G	G	A	A	G	A	A	G	A	A	G	G	A	G	A	A	A	0	G	G	G	A	A	A	A	0	A	A	G	0	G	A	A	G	A	A	A	A	G	A	A	0	G	G	A	G	A	A
PZE-101120208	T	C	C	C	C	C	C	T	C	C	0	C	C	T	C	C	T	T	C	C	C	C	T	T	T	C	C	C	T	C	T	C	C	T	C	C	C	T	T	C	C	T	C	C	C	C	C	T	0
	T	C	C	C	C	C	C	T	C	C	0	C	C	T	C	C	T	T	C	C	C	C	T	T	T	C	C	C	T	C	T	C	C	T	C	C	C	T	T	C	C	T	C	C	C	C	C	T	0
PZE-101120253	G	G	G	G	G	G	G	G	G	G	G	G	G	G	G	G	G	G	G	G	G	G	G	G	G	G	G	G	G	G	G	G	G	G	G	G	G	G	G	G	A	G	G	G	G	G	G	G	A
	G	G	G	G	G	G	G	G	G	G	G	G	G	G	G	G	G	G	G	G	G	G	G	G	G	G	G	G	G	G	G	G	G	G	G	G	G	G	G	G	A	G	G	G	G	G	G	G	A
PZE-101120262	T	C	T	T	T	T	T	T	0	T	T	T	T	T	C	T	T	T	C	C	C	T	T	T	T	C	C	T	T	T	T	C	T	T	T	T	T	T	T	C	T	T	T	C	T	T	T	C	T
	T	C	T	T	T	C	T	T	0	T	T	T	T	T	C	T	T	T	C	C	C	T	T	T	T	C	C	T	T	T	T	C	T	T	T	T	T	T	T	C	T	T	T	C	T	T	T	C	T
PZE-101120269	G	G	G	G	T	G	G	G	G	G	0	T	G	G	G	T	G	G	G	G	G	T	G	G	G	G	G	G	G	G	G	G	G	G	T	G	G	G	G	G	G	G	T	G	G	G	T	G	0
	G	G	G	G	T	G	G	G	G	G	0	T	G	G	G	T	G	G	G	G	G	T	G	G	G	G	G	G	G	G	G	G	G	G	T	G	G	G	G	G	G	G	T	G	G	G	T	G	0
PZE-101120307	G	G	G	G	G	G	G	G	G	G	G	G	G	G	G	G	G	G	G	G	G	G	T	G	T	G	G	G	G	T	T	T	G	G	G	G	G	T	G	G	G	G	G	G	G	G	G	T	G
	G	G	G	G	G	G	G	G	G	G	G	G	G	G	G	G	G	G	G	G	G	G	T	G	T	G	G	G	G	T	T	T	G	G	G	G	G	T	G	G	G	G	G	G	G	G	G	T	G
PZE-101120324	T	T	T	T	T	T	T	T	T	T	T	T	T	T	T	T	T	T	T	T	T	T	T	T	T	T	T	T	C	T	C	T	T	T	T	C	T	T	T	T	T	C	T	T	T	T	T	T	T
	T	T	T	T	T	C	T	T	T	T	T	T	T	T	T	T	T	T	T	T	T	T	T	T	T	T	T	T	C	T	C	T	T	T	T	C	T	T	T	T	T	C	T	T	T	T	T	T	T
PZE-101120328	C	C	C	C	C	A	C	C	C	C	C	C	C	C	C	C	C	C	C	C	C	C	C	C	C	C	C	C	A	C	A	C	C	C	C	A	C	C	C	C	C	A	C	C	C	C	C	C	C
	C	C	C	C	C	C	C	C	C	C	C	C	C	C	C	C	C	C	C	C	C	C	C	C	C	C	C	C	A	C	A	C	C	C	C	A	C	C	C	C	C	A	C	C	C	C	C	C	C
PZE-101120330	C	0	C	C	C	T	C	C	C	C	C	C	C	C	C	C	C	C	C	C	C	C	C	C	C	C	C	C	T	0	0	0	0	C	C	T	C	C	C	C	0	T	C	C	T	C	C	C	0
	C	0	C	C	C	C	C	C	C	C	C	C	C	C	C	C	C	C	C	C	C	C	C	C	C	C	C	C	T	0	0	0	0	C	C	T	C	C	C	C	0	T	C	C	T	C	C	C	0
PZE-101120365	A	A	A	A	A	A	A	A	A	A	A	A	A	A	G	A	A	A	A	A	A	A	A	A	A	A	G	A	A	A	A	A	A	A	A	G	G	A	A	A	A	A	A	G	A	A	A	A	A
	A	A	A	A	A	G	A	A	A	A	A	A	A	A	G	A	A	A	A	A	A	A	A	A	A	A	G	A	A	A	A	A	A	A	A	G	G	A	A	A	A	A	A	G	A	A	A	A	A
PZE-101120366	A	A	C	A	A	A	A	A	A	A	A	A	C	A	A	A	A	A	A	A	A	A	A	A	A	A	A	A	C	A	C	A	A	A	A	A	A	A	A	A	A	A	A	A	C	A	A	A	A
	A	A	C	A	A	A	A	A	A	A	A	A	C	A	A	A	A	A	A	A	A	A	A	A	A	A	A	A	C	A	C	A	A	A	A	A	A	A	A	A	A	A	A	A	C	A	A	A	A
PZE-101120367	T	T	T	T	T	T	T	T	T	T	T	T	T	T	C	T	T	T	T	T	0	T	T	T	T	T	C	T	T	T	T	T	T	T	T	C	C	T	T	T	T	T	T	C	T	T	T	T	T
	T	T	T	T	T	C	T	T	T	T	T	T	T	T	C	T	T	T	T	T	0	T	T	T	T	T	C	T	T	T	T	T	T	T	T	C	C	T	T	T	T	T	T	C	T	T	T	T	T
PZE-101120377	C	C	C	C	C	T	C	C	C	C	0	C	C	T	C	T	T	T	C	T	T	T	T	T	C	C	C	C	C	T	C	C	C	C	C	0	C	T	T	C	T	T	C	C	T	T	C	T	T
	C	C	C	C	C	C	C	C	C	C	0	C	C	T	C	T	T	T	C	T	T	T	T	T	C	C	C	C	C	T	C	C	C	C	C	0	C	T	T	C	T	T	C	C	T	T	C	T	T
PZE-101120379	A	A	C	A	A	A	A	A	A	A	A	A	C	A	A	A	A	A	A	A	A	A	A	A	A	A	A	A	C	A	C	A	A	A	A	A	A	A	A	A	A	A	A	A	A	A	A	A	A
	A	A	C	A	A	A	A	A	A	A	A	A	C	A	A	A	A	A	A	A	A	A	A	A	A	A	A	A	C	A	C	A	A	A	A	A	A	A	A	A	A	A	A	A	A	A	A	A	A
PZE-101120380	T	T	C	T	T	T	T	T	T	T	T	T	C	T	T	T	T	T	T	T	T	T	T	T	T	T	T	T	C	T	C	T	T	T	T	T	T	T	T	T	T	T	T	T	T	T	T	T	T
	T	T	C	T	T	T	T	T	T	T	T	T	C	T	T	T	T	T	T	T	T	T	T	T	T	T	T	T	C	T	C	T	T	T	T	T	T	T	T	T	T	T	T	T	T	T	T	T	T
PZE-101081934	T	T	T	T	T	T	T	T	T	T	T	T	T	T	T	0	T	T	T	T	T	0	T	0	T	T	T	T	0	T	0	0	T	0	T	T	0	T	T	G	T	0	T	0	T	T	0	T	T
	T	T	T	T	T	T	T	T	T	T	T	T	T	T	T	0	T	T	T	T	T	0	T	0	T	T	T	T	0	T	0	0	T	0	T	T	0	T	T	G	T	0	T	0	T	T	0	T	T
PZE-101081951	A	A	A	A	A	A	A	A	A	A	A	A	A	A	A	A	A	A	A	A	A	A	A	A	A	A	A	A	A	A	A	A	A	A	A	A	A	A	A	G	A	A	A	A	A	A	A	A	A
	A	A	A	A	A	A	A	A	A	A	A	A	A	A	A	A	A	A	A	A	A	A	A	A	A	A	A	A	A	A	A	A	A	A	A	A	A	A	A	G	A	A	A	A	A	A	A	A	A
PZE-101081952	A	A	A	A	A	A	A	A	A	A	0	A	A	A	A	G	A	A	A	A	A	G	G	G	A	A	A	A	G	A	G	G	A	G	A	A	G	A	A	G	A	G	A	G	G	A	G	A	A
	A	A	A	A	A	A	A	A	A	A	0	A	A	A	A	G	A	A	A	A	A	G	G	G	A	A	A	A	G	A	G	G	A	G	A	A	G	A	A	G	A	G	A	G	G	A	G	A	A
PZE-101081959	C	C	C	T	C	C	T	C	C	C	0	T	C	T	C	T	T	C	C	C	C	T	C	T	C	C	C	C	T	C	T	T	C	T	C	T	T	C	C	C	C	T	C	T	C	C	T	C	C
	C	C	C	T	C	C	T	C	C	C	0	T	C	T	C	T	T	C	C	C	C	T	C	T	C	C	C	C	T	C	T	T	C	T	C	T	T	C	C	C	C	T	C	T	C	C	T	C	C
PZE-101081964	A	G	G	G	G	A	G	G	G	A	G	G	A	G	G	G	G	A	A	G	G	G	A	G	A	G	0	G	A	A	G	A	A	A	G	A	G	A	A	A	A	G	G	A	G	A	G	A	A
	A	G	G	G	G	A	G	G	G	A	G	G	A	G	G	G	G	A	A	G	G	G	A	G	A	G	0	G	A	A	G	A	A	A	G	A	G	A	A	A	A	G	G	A	G	A	G	A	A
PZE-101082165	T	G	G	T	G	T	T	G	0	T	0	T	T	T	T	G	T	T	G	T	G	T	T	T	T	T	G	T	T	T	T	T	T	T	G	T	G	T	T	T	T	T	G	T	T	T	T	T	T
	T	G	G	T	G	T	T	G	0	T	0	T	T	T	T	G	T	T	G	T	G	T	T	T	T	T	G	T	T	T	T	T	T	T	G	T	G	T	T	T	T	T	G	T	T	T	T	T	T
PZE-101082210	G	G	G	G	G	G	G	G	G	G	G	G	G	G	G	G	G	G	G	G	G	G	G	G	T	G	G	G	T	G	G	T	T	G	G	G	0	G	G	G	T	G	G	G	0	G	G	T	G
	G	G	G	G	G	G	G	G	G	G	G	G	G	G	G	G	G	G	G	G	G	G	G	G	T	G	G	G	T	G	G	T	T	G	G	G	0	G	G	G	T	G	G	G	0	G	G	T	G
PZE-101082224	G	A	A	G	A	G	G	A	A	G	0	G	G	G	G	A	G	G	A	G	A	G	G	G	A	G	A	G	G	G	G	A	G	A	A	G	A	G	G	G	G	G	A	A	G	G	G	G	G
	G	A	A	G	A	G	G	A	A	G	0	G	G	G	G	A	G	G	A	G	A	G	G	G	A	G	A	G	G	G	G	A	G	A	A	G	A	G	G	G	G	G	A	A	G	G	G	G	G
PZE-101082227	T	C	C	C	C	C	C	C	C	C	C	C	T	C	C	C	C	T	C	C	C	C	T	C	C	C	C	T	T	C	C	C	T	C	C	C	C	C	C	C	T	C	C	C	T	C	C	T	0
	T	C	C	C	C	C	C	C	C	C	C	C	T	C	C	C	C	T	C	C	C	C	T	C	C	C	C	T	T	C	C	C	T	C	C	C	C	C	C	C	T	C	C	C	T	C	C	T	0
PZE-101082238	T	T	T	C	T	C	C	T	T	C	0	C	T	C	C	T	C	T	T	C	T	C	T	C	C	C	T	T	T	C	C	C	T	T	T	C	C	C	C	C	T	C	T	T	T	C	C	T	C
	T	T	T	C	T	C	C	T	T	C	0	C	T	C	C	T	C	T	T	C	T	C	T	C	C	C	T	T	T	C	C	C	T	T	T	C	C	C	C	C	T	C	T	T	T	C	C	T	C
PZE-101082298	T	C	C	T	C	C	T	C	C	T	C	T	C	T	C	C	T	T	C	C	T	T	C	T	C	C	C	T	T	C	T	C	C	C	C	T	C	T	T	T	T	T	C	C	C	T	T	T	C
[truncated: 56,183 more rows]
[truncated: 34 more columns]
