# Supplementary material for: Testing the link between genome size and growth rate in maize
Source: PeerJ. 2016 Sep 7;4:e2408. doi: 10.7717/peerj.2408 (PMC5018661; doi:10.7717/peerj.2408)
Supplement: Data S2 [file peerj-04-2408-s002.xlsx]

## Sheet: LerMax
Accession	Inbred line	Replicate	LERmax
A6_usa	A6	1	4.810
A6_usa	A6	2	4.116
ARGL256_inra	L256	1	5.400
ARGL256_inra	L256	2	5.856
B73_inra	B73	1	5.160
B73_inra	B73	2	5.682
BA90_inra	BA90	1	5.640
BA90_inra	BA90	2	5.444
CH10	CH10	2	6.768
CI187-2_inra	CI1872U	1	5.470
CI187-2_inra	CI1872U	2	3.990
CLA17_cim	CLA17	1	5.770
CLA17_cim	CLA17	2	5.576
CML069_cim	CML69	1	4.770
CML069_cim	CML69	2	5.358
CML245_inra	CML245	1	6.300
CML245_inra	CML245	2	4.872
CML247_usa	CML247	1	5.690
CML247_usa	CML247	2	4.552
CML254_usa	CML254	1	6.290
CML254_usa	CML254	2	5.139
CML287_usa	CML287	1	5.420
CML287_usa	CML287	2	6.353
CML312	CML312	2	4.062
CML333_usa	CML333	1	5.330
CML333_usa	CML333	2	4.425
CML340	CML340	2	5.273
CML341	CML341	2	4.535
CML344	CML344	2	3.800
CML440	CML440	2	4.207
CML91_usa	CML91	1	5.170
CML91_usa	CML91	2	4.036
CML-P1_cim	CMLP1	1	4.820
CML-P1_cim	CMLP1	2	4.848
CML-P2_cim	CMLP2	1	5.530
CML-P2_cim	CMLP2	2	4.884
CZL04006	CZL04006	2	6.334
CZL0617	CZL0617	2	5.265
CZL071	CZL071	2	6.517
DTPWC9-F104	DTPWC9-F104	2	4.588
DTPWC9-F115	DTPWC9-F115	2	5.350
DTPWC9-F31	DTPWC9-F31	2	4.094
DTPYC9-F46	DTPYC9-F46	2	5.895
DTPYC9-F74	DTPYC9-F74	2	5.374
EA1197_inra	EA1197	1	6.090
EA1197_inra	EA1197	2	5.711
EA1201_inra	EA1201	1	6.090
EA1201_inra	EA1201	2	5.395
EA1433_inra	EA1433	1	4.580
EA1433_inra	EA1433	2	3.846
EA1866_inra	EA1866	1	6.090
EA1866_inra	EA1866	2	6.848
EM1712_inra	EA1712	1	5.91
EM1712_inra	EA1712	2	6.598
EP1_inra	EP1	1	4.43
EP1_inra	EP1	2	4.641
F2834T_usa	F2834T	1	5.44
F2834T_usa	F2834T	2	4.831
F39_inra	F39	1	6.68
F39_inra	F39	2	5.817
F471_inra	F471	1	5.74
F471_inra	F471	2	5.58
FC16	FC16	2	6.834
FC1852_inra	FC1852	1	5.94
FC1852_inra	FC1852	2	6.293
FC209_inra	FC209	1	6.24
FC209_inra	FC209	2	6.174
FC24_inra	FC24	1	6.02
FC24_inra	FC24	2	5.957
FV2_inra	FV2	1	5.58
FV2_inra	FV2	2	5.226
FV252_inra	FV252	1	4.72
FV252_inra	FV252	2	4.873
FV65	FV65	2	6.651
FV7_inra	FV7	1	5.94
FV7_inra	FV7	2	6.666
FV71_inra	FV71	1	5.23
FV71_inra	FV71	2	5.048
FV75_inra	FV75	1	5.45
FV75_inra	FV75	2	6.263
FV76	FV76	2	5.208
G37-inraGWA	G37	1	4.71
G37-inraGWA	G37	2	4.695
H16_cim	H16	1	4.25
H16_cim	H16	2	4.462
K44_inra	KUI44	1	5.21
K44_inra	KUI44	2	4.046
K64R_cim	K64R	1	5.5
K64R_cim	K64R	2	5.853
KUI11_usa	KUI11	1	5.53
KUI11_usa	KUI11	2	5.633
KUI3_usa	KUI3	1	3.98
KUI3_usa	KUI3	2	4.355
KY21_usa	KY21	1	4.93
KY21_usa	KY21	2	6.181
LAN496_inra	LAN496	1	5.98
LAN496_inra	LAN496	2	5.967
LP1037_inra	LP1037	1	5.73
LP1037_inra	LP1037	2	6.689
LP1233_inra	LP1233	1	5.65
LP1233_inra	LP1233	2	6.297
LP35_inra	LP35	1	5.81
LP35_inra	LP35	2	5.572
GCP-196prov_cim	LPSC7-F103	2	4.145
GCP-193prov_cim	LPSC7-F64	2	4.839
GCP-195prov_cim	LPSC7-F71	2	5.494
GCP-197prov_cim	LPSC7-F86	2	4.448
MBS847_inra	MBS847	1	4.08
MBS847_inra	MBS847	2	4.814
Mo17_inra	MO17	1	4.86
Mo17_inra	MO17	2	4.709
Mo22_inra	MO22	1	5.32
Mo22_inra	MO22	2	5.485
N25_inra	N25	1	4.45
N25_inra	N25	2	4.983
N6	N6	2	6.283
NC298_usa	NC298	1	5.35
NC298_usa	NC298	2	4.198
NC304_usa	NC304	1	5.11
NC304_usa	NC304	2	4.935
NC320_usa	NC320	1	6.14
NC320_usa	NC320	2	5.08
NC338_usa	NC338	1	4.88
NC338_usa	NC338	2	5.085
ND30	ND30	2	6.942
NY302_inra	NY302	1	5.42
NY302_inra	NY302	2	5.04
PB40R_inra	PB40R	1	5.01
PB40R_inra	PB40R	2	5.075
SC55_usa	SC55	1	6.07
SC55_usa	SC55	2	6.414
SC-Malawi_cim	SCMALAWI	1	6.07
SC-Malawi_cim	SCMALAWI	2	6.815
TZI18_usa	TZI18	1	5.31
TZI18_usa	TZI18	2	5.468
W117U	W117U	2	5.025
W85_inra	W85	1	5.52
W85_inra	W85	2	4.958
YUBR05	YUBR05	2	4.798
ZN6_inra	ZN6	1	5.98
ZN6_inra	ZN6	2	5.234

## Sheet: GS
Accession	Inbred line	Replicate	GenomeSize (pg)
A6_usa	A6	1	5.960
A6_usa	A6	2	5.728
A6_usa	A6	3	5.933
ARGL256_inra	L256	1	5.349
ARGL256_inra	L256	2	5.290
ARGL256_inra	L256	3	5.336
B73_inra	B73	1	5.190
B73_inra	B73	2	5.317
B73_inra	B73	3	5.170
B73_inra	B73	4	5.167
B73_inra	B73	5	5.202
B73_inra	B73	6	5.198
B73_inra	B73	8	5.192
B73_inra	B73	9	5.173
B73_inra	B73	10	5.170
B73_inra	B73	11	5.336
B73_inra	B73	2	5.245
B73_inra	B73	3	5.202
B73_inra	B73	4	5.250
B73_inra	B73	6	5.137
B73_inra	B73	7	5.160
B73_inra	B73	8	5.188
BA90_inra	BA90	1	5.432
BA90_inra	BA90	2	5.319
BA90_inra	BA90	3	5.474
CH10_inra	CH10	1	5.069
CH10_inra	CH10	2	5.022
CH10_inra	CH10	3	5.063
CI187-2_inra	CI1872U	1	5.254
CI187-2_inra	CI1872U	2	5.207
CI187-2_inra	CI1872U	3	5.314
CLA17_cim	CLA17	1	5.888
CLA17_cim	CLA17	2	5.623
CLA17_cim	CLA17	3	5.880
CML069_cim	CML69	1	5.643
CML069_cim	CML69	2	5.673
CML069_cim	CML69	3	5.595
CML245_inra	CML245	1	5.820
CML245_inra	CML245	2	5.559
CML245_inra	CML245	3	5.731
CML247_usa	CML247	1	5.756
CML247_usa	CML247	2	5.500
CML247_usa	CML247	3	5.657
CML254_usa	CML254	1	5.587
CML254_usa	CML254	2	5.425
CML254_usa	CML254	3	5.482
CML287_usa	CML287	1	5.522
CML287_usa	CML287	2	5.475
CML287_usa	CML287	3	5.438
CML312_cim	CML312	1	5.394
CML312_cim	CML312	2	5.283
CML312_cim	CML312	3	5.257
CML333_usa	CML333	1	5.516
CML333_usa	CML333	2	5.473
CML333_usa	CML333	3	5.511
CML333_usa	CML333	3	5.641
CML340_cim	CML340	1	5.558
CML340_cim	CML340	2	5.434
CML340_cim	CML340	3	5.544
CML341_cim	CML341	1	5.544
CML341_cim	CML341	2	5.498
CML341_cim	CML341	3	5.452
CML344_cim	CML344	1	5.648
CML344_cim	CML344	2	5.472
CML344_cim	CML344	3	5.609
CML440_cim	CML440	1	5.566
CML440_cim	CML440	2	5.617
CML440_cim	CML440	3	5.610
CML91_usa	CML91	1	5.480
CML91_usa	CML91	3	5.405
CML-P1_cim	CMLP1	1	5.695
CML-P1_cim	CMLP1	2	5.522
CML-P1_cim	CMLP1	3	5.587
CML-P2_cim	CMLP2	1	5.580
CML-P2_cim	CMLP2	2	5.515
CML-P2_cim	CMLP2	3	5.675
CZL04006_cim	CZL04006	1	5.673
CZL04006_cim	CZL04006	2	5.418
CZL04006_cim	CZL04006	3	5.436
CZL0617_cim	CZL0617	1	5.652
CZL0617_cim	CZL0617	2	5.459
CZL0617_cim	CZL0617	3	5.538
CZL071_cim	CZL071	1	5.360
CZL071_cim	CZL071	2	5.282
CZL071_cim	CZL071	3	5.257
EA1197_inra	EA1197	1	5.594
EA1197_inra	EA1197	2	5.408
EA1197_inra	EA1197	3	5.642
EA1201_inra	EA1201	1	5.723
EA1201_inra	EA1201	2	5.396
EA1201_inra	EA1201	3	5.566
EA1433_inra	EA1433	1	5.218
EA1433_inra	EA1433	2	5.301
EA1433_inra	EA1433	3	5.205
EA1866_inra	EA1866	1	5.509
EA1866_inra	EA1866	2	5.458
EA1866_inra	EA1866	3	5.356
EM1712_inra	EA1712	1	5.328
EM1712_inra	EA1712	2	5.334
EM1712_inra	EA1712	3	5.352
EP1_inra	EP1	1	5.039
EP1_inra	EP1	2	5.297
EP1_inra	EP1	3	5.178
F2834T_usa	F2834T	1	5.508
F2834T_usa	F2834T	2	5.392
F2834T_usa	F2834T	3	5.426
F39_inra	F39	1	5.334
F39_inra	F39	2	5.234
F39_inra	F39	3	5.370
F471_inra	F471	1	5.354
F471_inra	F471	2	5.152
F471_inra	F471	3	5.264
FC16_inra	FC16	1	5.245
FC16_inra	FC16	2	5.298
FC16_inra	FC16	3	5.271
FC1852_inra	FC1852	1	5.296
FC1852_inra	FC1852	2	5.390
FC1852_inra	FC1852	3	5.297
FC209_inra	FC209	1	4.996
FC209_inra	FC209	2	5.154
FC209_inra	FC209	3	5.000
FC24_inra	FC24	1	5.477
FC24_inra	FC24	3	5.346
FV2_inra	FV2	1	5.244
FV2_inra	FV2	2	5.116
FV2_inra	FV2	3	5.226
FV252_inra	FV252	1	5.109
FV252_inra	FV252	2	5.226
FV252_inra	FV252	3	5.511
FV252_inra	FV252	4	5.072
FV65_inra	FV65	1	5.229
FV65_inra	FV65	2	5.192
FV65_inra	FV65	3	5.223
FV7_inra	FV7	1	5.259
FV7_inra	FV7	2	5.174
FV7_inra	FV7	3	5.279
FV71_inra	FV71	1	5.081
FV71_inra	FV71	2	5.121
FV71_inra	FV71	3	5.107
FV75_inra	FV75	1	5.096
FV75_inra	FV75	2	5.157
FV75_inra	FV75	3	5.078
FV76_inra	FV76	1	5.297
FV76_inra	FV76	2	5.170
FV76_inra	FV76	3	5.341
G37-inraGWA	G37	1	5.615
G37-inraGWA	G37	2	5.756
G37-inraGWA	G37	3	5.573
GCP-186prov_cim	DTPWC9-F115	1	5.637
GCP-186prov_cim	DTPWC9-F115	2	5.498
GCP-186prov_cim	DTPWC9-F115	3	5.530
GCP-187prov_cim	DTPWC9-F104	1	5.545
GCP-187prov_cim	DTPWC9-F104	2	5.536
GCP-187prov_cim	DTPWC9-F104	3	5.489
GCP-188prov_cim	DTPWC9-F31	1	5.703
GCP-188prov_cim	DTPWC9-F31	2	5.671
GCP-188prov_cim	DTPWC9-F31	3	5.572
GCP-189prov_cim	DTPWC9-F74	1	5.412
GCP-189prov_cim	DTPWC9-F74	2	5.420
GCP-189prov_cim	DTPWC9-F74	3	5.367
GCP-189prov_cim	DTPWC9-F74	4	5.580
GCP-189prov_cim	DTPWC9-F74	5	5.545
GCP-191prov_cim	DTPWC9-F46	1	5.357
GCP-191prov_cim	DTPWC9-F46	2	5.461
GCP-191prov_cim	DTPWC9-F46	3	5.521
GCP-191prov_cim	DTPWC9-F46	4	5.608
GCP-193prov_cim	LPSC7-F64	1	5.456
GCP-193prov_cim	LPSC7-F64	2	5.449
GCP-193prov_cim	LPSC7-F64	3	5.457
GCP-195prov_cim	LPSC7-F71	1	5.384
GCP-195prov_cim	LPSC7-F71	2	5.392
GCP-195prov_cim	LPSC7-F71	3	5.463
GCP-196prov_cim	LPSC7-F103	1	5.438
GCP-196prov_cim	LPSC7-F103	2	5.444
GCP-196prov_cim	LPSC7-F103	3	5.474
GCP-197prov_cim	LPSC7-F86	1	5.509
GCP-197prov_cim	LPSC7-F86	2	5.400
GCP-197prov_cim	LPSC7-F86	3	5.566
H16_cim	H16	1	5.351
H16_cim	H16	2	5.407
H16_cim	H16	3	5.365
K44_inra	KUI44	1	5.342
K44_inra	KUI44	2	5.144
K44_inra	KUI44	3	5.281
K64R_cim	K64R	1	5.367
K64R_cim	K64R	2	5.156
K64R_cim	K64R	3	5.182
KUI11_usa	KUI11	1	5.488
KUI11_usa	KUI11	2	5.549
KUI11_usa	KUI11	3	5.587
KUI3_usa	KUI3	1	5.617
KUI3_usa	KUI3	2	5.700
KUI3_usa	KUI3	3	5.603
KY21_usa	KY21	1	5.221
KY21_usa	KY21	2	5.146
KY21_usa	KY21	3	5.225
LAN496_inra	LAN496	1	5.126
LAN496_inra	LAN496	2	5.160
LAN496_inra	LAN496	3	5.225
LP1037_inra	LP1037	2	5.303
LP1037_inra	LP1037	3	5.267
LP1037_inra	LP1037	4	5.341
LP1233_inra	LP1233	1	5.435
LP1233_inra	LP1233	2	5.394
LP1233_inra	LP1233	3	5.425
LP1233_inra	LP1233	4	5.316
LP35_inra	LP35	1	5.580
LP35_inra	LP35	2	5.339
LP35_inra	LP35	3	5.282
MBS847_inra	MBS847	1	5.172
MBS847_inra	MBS847	2	5.159
MBS847_inra	MBS847	3	5.172
Mo17_inra	MO17	1	5.149
Mo17_inra	MO17	2	5.154
Mo17_inra	MO17	3	5.168
Mo22_inra	MO22	1	5.559
Mo22_inra	MO22	2	5.381
Mo22_inra	MO22	3	5.402
N25_inra	N25	1	5.314
N25_inra	N25	2	5.250
N25_inra	N25	3	5.361
N6_inra	N6	1	5.263
N6_inra	N6	2	5.147
N6_inra	N6	3	5.262
NC298_usa	NC298	1	5.766
NC298_usa	NC298	2	5.841
NC298_usa	NC298	3	5.630
NC304_usa	NC304	1	5.502
NC304_usa	NC304	2	5.452
NC304_usa	NC304	3	5.491
NC320_usa	NC320	1	5.540
NC320_usa	NC320	3	5.308
NC320_usa	NC320	4	5.382
NC320_usa	NC320	5	5.370
NC338_usa	NC338	1	5.793
NC338_usa	NC338	2	5.668
NC338_usa	NC338	3	5.881
ND30_inra	ND30	1	4.991
ND30_inra	ND30	2	5.049
ND30_inra	ND30	3	5.084
NY302_inra	NY302	1	5.018
NY302_inra	NY302	2	4.968
NY302_inra	NY302	3	4.904
PB40R_inra	PB40R	1	5.357
PB40R_inra	PB40R	2	5.182
PB40R_inra	PB40R	3	5.295
SC55_usa	SC55	1	5.467
SC55_usa	SC55	2	5.485
SC55_usa	SC55	3	5.499
SC-Malawi_cim	SCMALAWI	1	5.414
SC-Malawi_cim	SCMALAWI	2	5.368
SC-Malawi_cim	SCMALAWI	3	5.573
TZI18_usa	TZI18	2	5.861
TZI18_usa	TZI18	3	5.923
W117_inra	W117U	1	5.289
W117_inra	W117U	2	5.337
W117_inra	W117U	3	5.333
W85_inra	W85	1	5.178
W85_inra	W85	2	5.147
W85_inra	W85	3	5.177
W85_inra	W85	4	5.252
YUBR5_inra	YUBR05	1	5.144
YUBR5_inra	YUBR05	2	5.209
YUBR5_inra	YUBR05	3	5.289
ZN6_inra	ZN6	1	5.395
ZN6_inra	ZN6	2	5.403
ZN6_inra	ZN6	3	5.461
